# Supplementary material for: Genome-Wide Identification and Functional Characterization of β-Agarases in Vibrio astriarenae Strain HN897
Source: PubMed Central journal article supplement (PMC7326809; doi:10.3389/fmicb.2020.01404), 2020-06-24

COG Categories

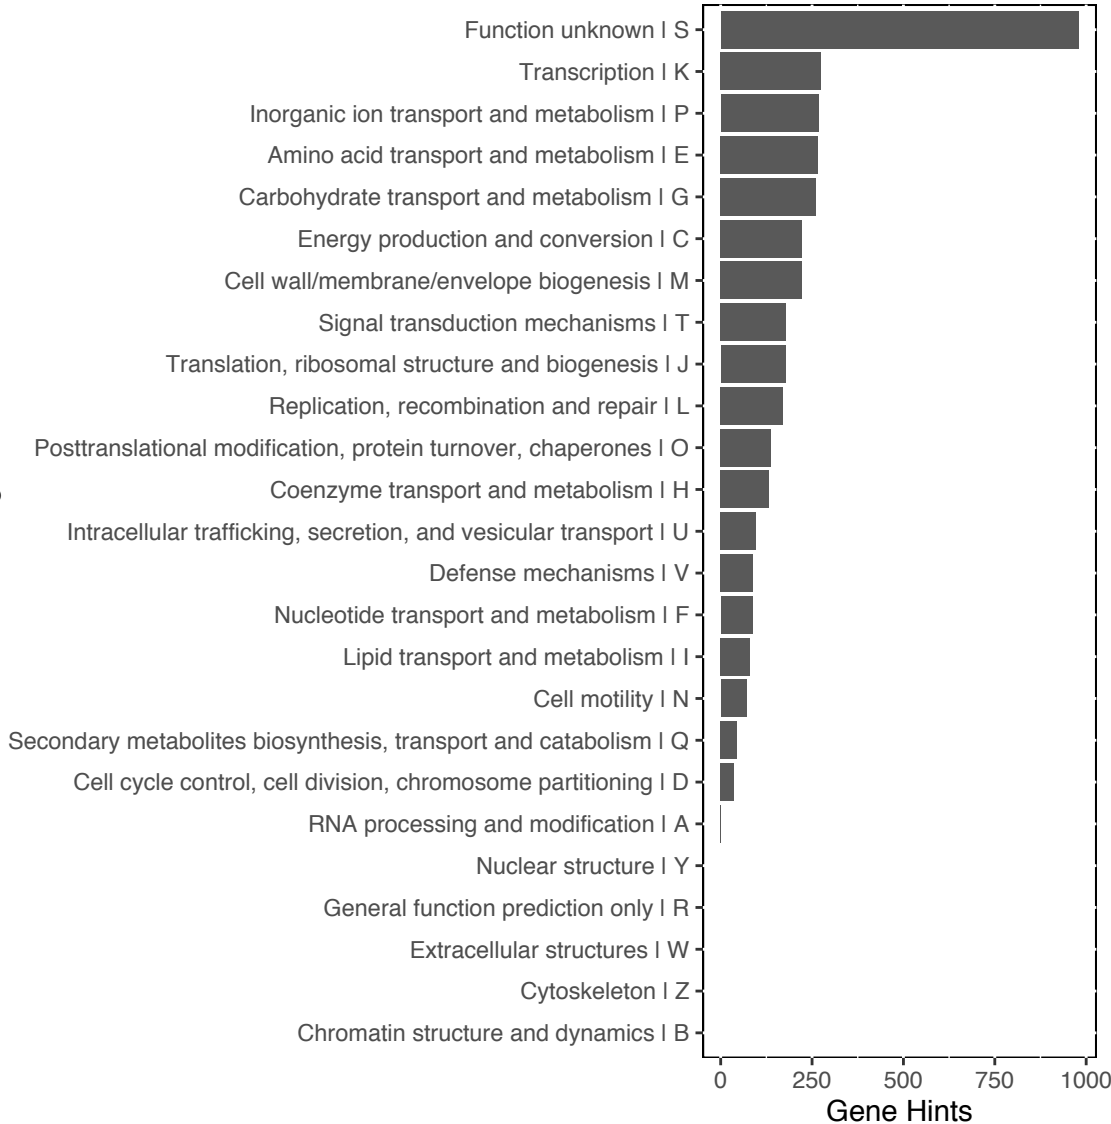

Supplement: Image_2.pdf [file Image_2.pdf]
