# Supplementary material for: Genome-Wide Identification and Functional Characterization of β-Agarases in Vibrio astriarenae Strain HN897
Source: PubMed Central journal article supplement (PMC7326809; doi:10.3389/fmicb.2020.01404), 2020-06-24

**A** The proportion of hit species for **Vas1**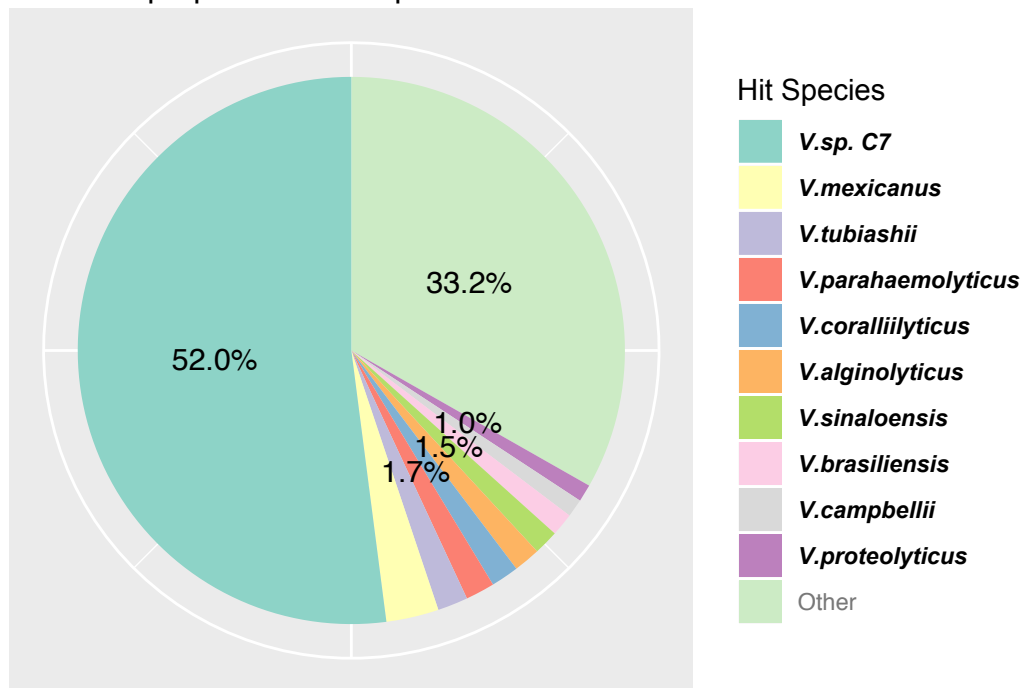**B** The proportion of hit species for **Vas2**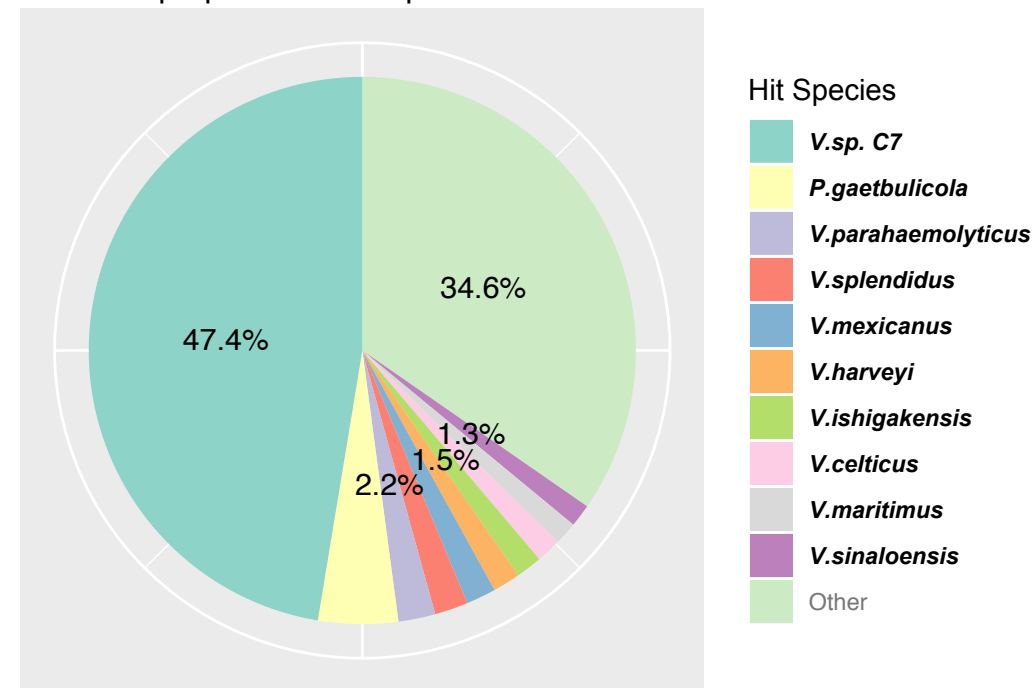**C** Alignment statistics of top 10 hit species for **Vas1**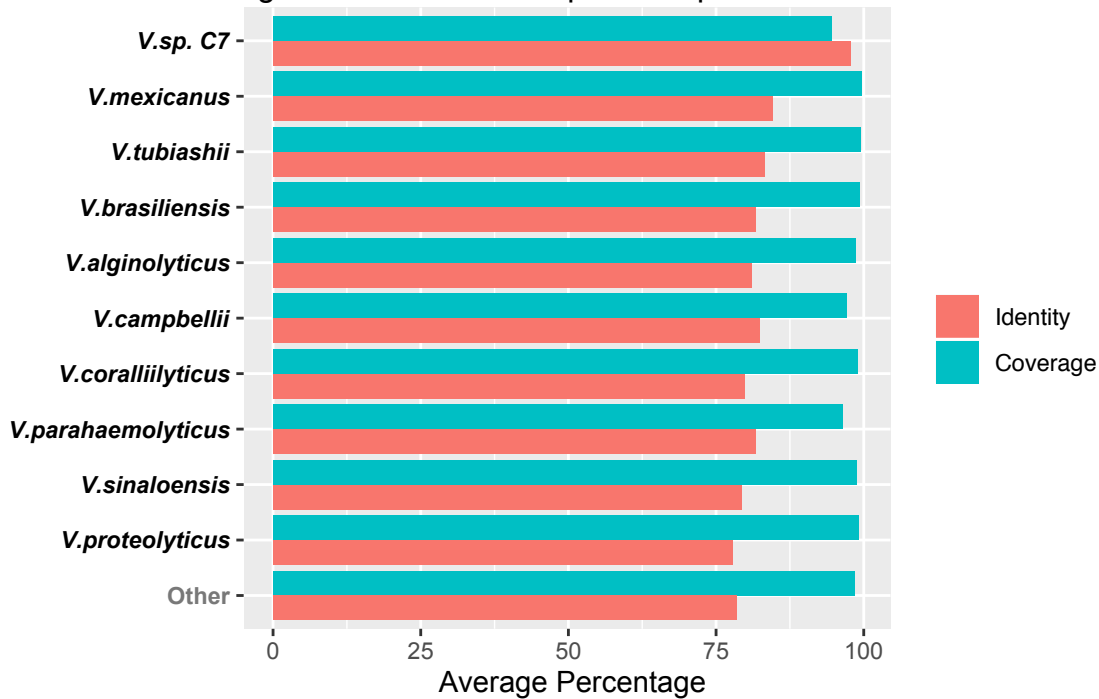**D** Alignment statistics of top 10 hit species for **Vas2**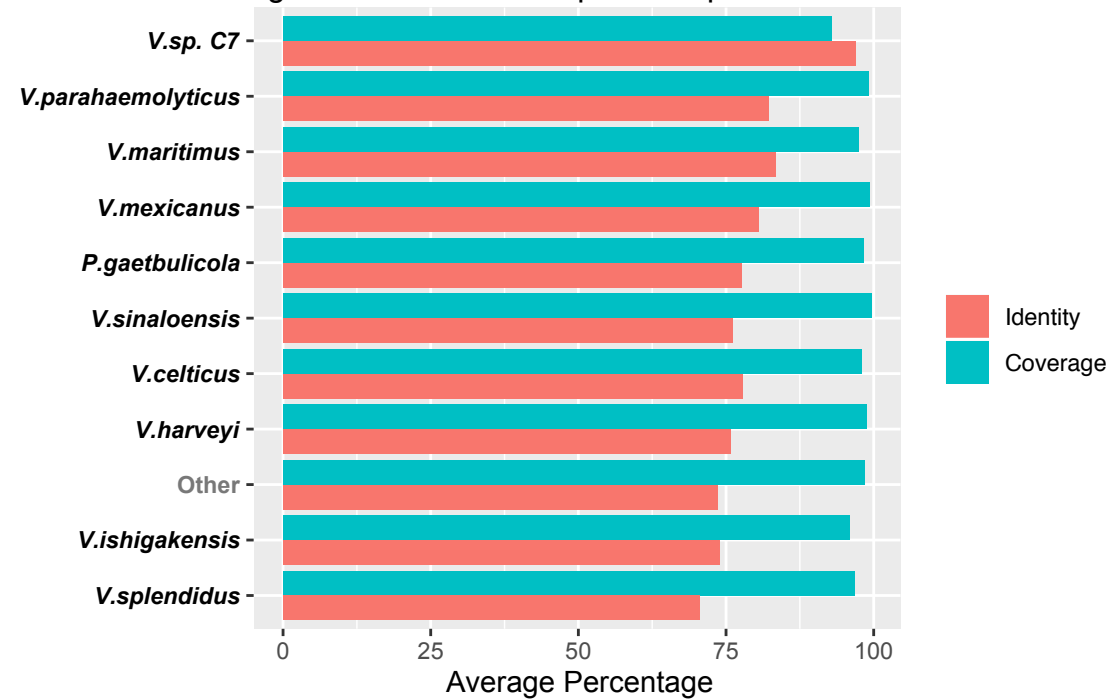

Supplement: Image_3.pdf [file Image_3.pdf]
