# Supplementary material for: Genome-Wide Identification and Functional Characterization of β-Agarases in Vibrio astriarenae Strain HN897
Source: PubMed Central journal article supplement (PMC7326809; doi:10.3389/fmicb.2020.01404), 2020-06-24

# Colored ranges

- Marisflavi
- Scopthalmi
- Orientalis
- Rumoiensis
- Halioticoli
- Nigripulchritudo
- Splendidus
- Mediterranei
- Anguillarum
- Gazogenes
- Cholerae
- Vulnificus
- Harveyi

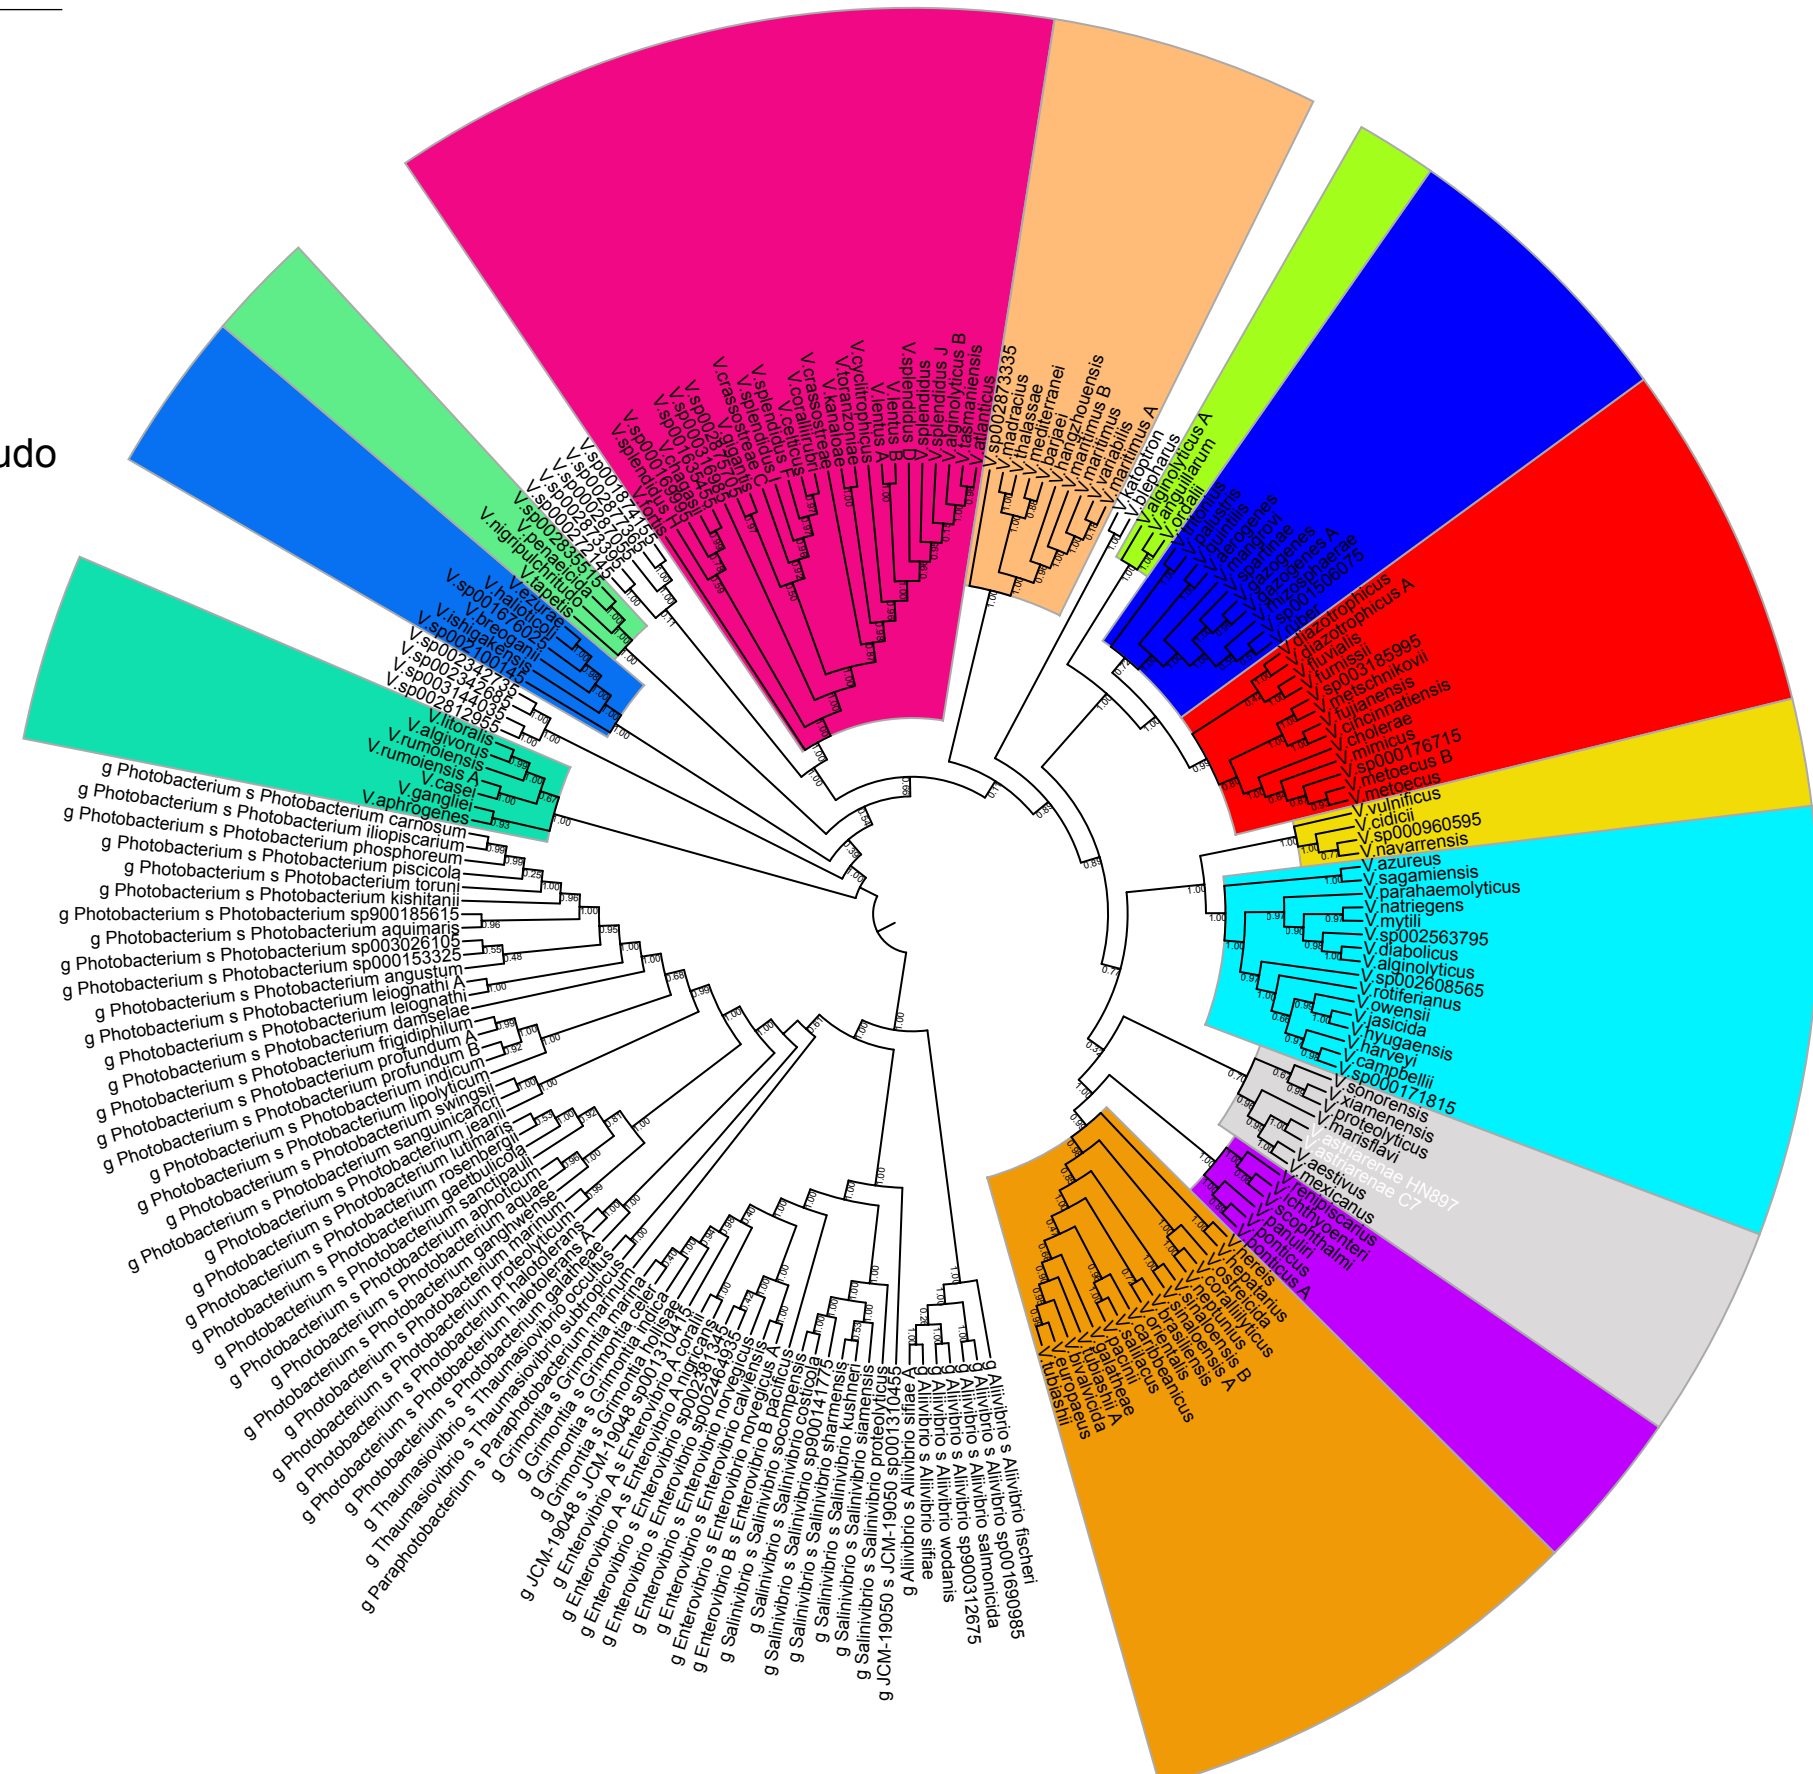

Supplement: Image_4.pdf [file Image_4.pdf]
