# Supplementary material for: Genome-Wide Identification and Functional Characterization of β-Agarases in Vibrio astriarenae Strain HN897
Source: Front Microbiol. 2020 Jun 24;11:1404. doi: 10.3389/fmicb.2020.01404 (PMC7326809; doi:10.3389/fmicb.2020.01404)
Supplement: TABLE S5 — Identification of the β-agarase gene repertoire in HN897. tab#1: Related to Figure 3A. Annotations for a total of 72 identified GH subfamilies in HN897 (Eight putative beta-agarase were highlighted). tab#2: Related to Figures 1C,D, 3A,B. InterProScan outputs for the protein domains of 72 Glycoside Hydrolases, together with the first two longest CDSs that contain the tandem repeat sequences discussed in manuscript. tab#3: Related to Figure 3A. Generic Feature Format Version 3 (GFF3) file of the catalytic protein domains for a total of 72 GHs annotated by CAZy database. tab#4: Related to Figure 3C. A total of 45 subject genome assemblies used for sequence similarity searching of β-agarase gene cluster. tab#5: Related to Figure 3C Upper panel: The output of MultiGeneBLAST v1.1.14 concerning the comparions of β-agarases containing regions on Vas1 (Four GH50s and a single GH16 Vas1_1339) among the investigated 46 genomes. tab#6: Related to Figure 3C Bottom panel: The output of MultiGeneBLAST v1.1.14 concerning the comparions of β-agarases containing regions on Vas2 (Three GH16s) among the investigated 46 genomes. [file Table_5.XLSX]

## Sheet: All72_CAZy_GHs
Related to Figure.3A #Annotations for a total of 72 identified GH subfamilies in HN897 (Eight putative beta-agarase were highlighted).
Gene	Family	Evalue	Covered_fraction	Class	Class_definition	Class_Description
Vas1_1058	GH13_27	8.4e-159	0.990566	GH	Glycoside Hydrolases
Vas1_1120	GH1	1.3e-147	0.990676	GH	Glycoside Hydrolases	beta-glucosidase (EC 3.2.1.21); beta-galactosidase (EC 3.2.1.23); beta-mannosidase (EC 3.2.1.25); beta-glucuronidase (EC 3.2.1.31); beta-D-fucosidase (EC 3.2.1.38); phlorizin hydrolase (EC 3.2.1.62); exo-beta-1,4-glucanase (EC 3.2.1.74); 6-phospho-beta-galactosidase (EC 3.2.1.85); 6-phospho-beta-glucosidase (EC 3.2.1.86); strictosidine beta-glucosidase (EC 3.2.1.105); lactase (EC 3.2.1.108); amyg…
Vas1_1280	GH3	4e-65	0.976852	GH	Glycoside Hydrolases	beta-glucosidase (EC 3.2.1.21); xylan 1,4-beta-xylosidase (EC 3.2.1.37); beta-N-acetylhexosaminidase (EC 3.2.1.52); glucan 1,3-beta-glucosidase (EC 3.2.1.58); glucan 1,4-beta-glucosidase (EC 3.2.1.74); exo-1,3-1,4-glucanase (EC 3.2.1.-); alphalpha-L-arabinofuranosidase (EC 3.2.1.55).
Vas1_1309	GH2	1.1e-107	0.654255	GH	Glycoside Hydrolases	beta-galactosidase (EC 3.2.1.23) ; beta-mannosidase (EC 3.2.1.25); beta-glucuronidase (EC 3.2.1.31); mannosylglycoprotein endo-beta-mannosidase (EC 3.2.1.152); exo-beta-glucosaminidase (EC 3.2.1.165)
Vas1_1310	GH117	1.3e-46	0.554502	GH	Glycoside Hydrolases	alpha-1,3-L-neoagarooligosaccharide hydrolase (EC 3.2.1.-); alpha-1,3-L-neoagarobiase / neoagarobiose hydrolase (EC 3.2.1.-)
Vas1_1312	GH50	5.9e-246	0.998469	GH	Glycoside Hydrolases	beta-agarase (EC 3.2.1.81).
Vas1_1313	GH50	3.3e-192	0.996937	GH	Glycoside Hydrolases	beta-agarase (EC 3.2.1.81).
Vas1_1314	GH50	2.8e-220	0.97856	GH	Glycoside Hydrolases	beta-agarase (EC 3.2.1.81).
Vas1_1317	GH50	4.9e-208	0.977029	GH	Glycoside Hydrolases	beta-agarase (EC 3.2.1.81).
Vas1_1339	GH16	5.6e-33	0.978836	GH	Glycoside Hydrolases	xyloglucan:xyloglucosyltransferase (EC 2.4.1.207); keratan-sulfate endo-1,4-beta-galactosidase (EC 3.2.1.103); endo-1,3-beta-glucanase (EC 3.2.1.39); endo-1,3(4)-beta-glucanase (EC 3.2.1.6); licheninase (EC 3.2.1.73); beta-agarase (EC 3.2.1.81); kappa;-carrageenase (EC 3.2.1.83); xyloglucanase (EC 3.2.1.151)
Vas1_1435	GH73	8.3e-20	0.882812	GH	Glycoside Hydrolases	peptidoglycan hydrolase with endo-beta-N-acetylglucosaminidase specificity (EC 3.2.1.-)
Vas1_1562	GH26	1.7e-23	0.508251	GH	Glycoside Hydrolases	beta-mannanase (EC 3.2.1.78); beta-1,3-xylanase (EC 3.2.1.32)
Vas1_1621	GH117	9e-38	0.791469	GH	Glycoside Hydrolases	alpha-1,3-L-neoagarooligosaccharide hydrolase (EC 3.2.1.-); alpha-1,3-L-neoagarobiase / neoagarobiose hydrolase (EC 3.2.1.-)
Vas1_1669	GH2	8.9e-91	0.732713	GH	Glycoside Hydrolases	beta-galactosidase (EC 3.2.1.23) ; beta-mannosidase (EC 3.2.1.25); beta-glucuronidase (EC 3.2.1.31); mannosylglycoprotein endo-beta-mannosidase (EC 3.2.1.152); exo-beta-glucosaminidase (EC 3.2.1.165)
Vas1_1780	GH36	2e-73	0.37936	GH	Glycoside Hydrolases	alpha-galactosidase (EC 3.2.1.22); alpha-N-acetylgalactosaminidase (EC 3.2.1.49); stachyose synthase (EC 2.4.1.67); raffinose synthase (EC 2.4.1.82)
Vas1_1781	GH103	6.9e-119	0.99322	GH	Glycoside Hydrolases	peptidoglycan lytic transglycosylase (EC 3.2.1.-)
Vas1_1937	GH36	5.6e-234	0.975291	GH	Glycoside Hydrolases	alpha-galactosidase (EC 3.2.1.22); alpha-N-acetylgalactosaminidase (EC 3.2.1.49); stachyose synthase (EC 2.4.1.67); raffinose synthase (EC 2.4.1.82)
Vas1_1940	GH2	3.7e-225	0.976064	GH	Glycoside Hydrolases	beta-galactosidase (EC 3.2.1.23) ; beta-mannosidase (EC 3.2.1.25); beta-glucuronidase (EC 3.2.1.31); mannosylglycoprotein endo-beta-mannosidase (EC 3.2.1.152); exo-beta-glucosaminidase (EC 3.2.1.165)
Vas1_201	GH116	2.2e-104	0.944904	GH	Glycoside Hydrolases	acid beta-glucosidase (EC 3.2.1.45); beta-glucosidase (EC 3.2.1.21); beta-xylosidase (EC 3.2.1.37)
Vas1_203	GH94	9.2e-246	0.745174	GH	Glycoside Hydrolases	cellobiose phosphorylase (EC 2.4.1.20); cellodextrin phosphorylase (EC 2.4.1.49); chitobiose phosphorylase (EC 2.4.1.-); cyclic beta-1,2-glucan synthase (EC 2.4.1.-)
Vas1_2045	GH73	1.7e-35	0.96875	GH	Glycoside Hydrolases	peptidoglycan hydrolase with endo-beta-N-acetylglucosaminidase specificity (EC 3.2.1.-)
Vas1_205	GH1	9.7e-160	0.974359	GH	Glycoside Hydrolases	beta-glucosidase (EC 3.2.1.21); beta-galactosidase (EC 3.2.1.23); beta-mannosidase (EC 3.2.1.25); beta-glucuronidase (EC 3.2.1.31); beta-D-fucosidase (EC 3.2.1.38); phlorizin hydrolase (EC 3.2.1.62); exo-beta-1,4-glucanase (EC 3.2.1.74); 6-phospho-beta-galactosidase (EC 3.2.1.85); 6-phospho-beta-glucosidase (EC 3.2.1.86); strictosidine beta-glucosidase (EC 3.2.1.105); lactase (EC 3.2.1.108); amyg…
Vas1_2069	GH20	5.1e-105	0.973294	GH	Glycoside Hydrolases	beta-hexosaminidase (EC 3.2.1.52); lacto-N-biosidase (EC 3.2.1.140); beta-1,6-N-acetylglucosaminidase) (EC 3.2.1.-); beta-6-SO3-N-acetylglucosaminidase (EC 3.2.1.-)
Vas1_2086	GH23	1e-21	0.925926	GH	Glycoside Hydrolases	lysozyme type G (EC 3.2.1.17); peptidoglycan lyase (EC 4.2.2.-) also known in the literature as peptidoglycan lytic transglycosylase
Vas1_2308	GH9	4.5e-48	0.851675	GH	Glycoside Hydrolases	endoglucanase (EC 3.2.1.4); cellobiohydrolase (EC 3.2.1.91); beta-glucosidase (EC 3.2.1.21); exo-beta-glucosaminidase (EC 3.2.1.165)
Vas1_2310	GH20	3.9e-118	0.973294	GH	Glycoside Hydrolases	beta-hexosaminidase (EC 3.2.1.52); lacto-N-biosidase (EC 3.2.1.140); beta-1,6-N-acetylglucosaminidase) (EC 3.2.1.-); beta-6-SO3-N-acetylglucosaminidase (EC 3.2.1.-)
Vas1_2311	GH94	9.4e-280	0.746139	GH	Glycoside Hydrolases	cellobiose phosphorylase (EC 2.4.1.20); cellodextrin phosphorylase (EC 2.4.1.49); chitobiose phosphorylase (EC 2.4.1.-); cyclic beta-1,2-glucan synthase (EC 2.4.1.-)
Vas1_2369	GH23	8.7e-09	0.82963	GH	Glycoside Hydrolases	lysozyme type G (EC 3.2.1.17); peptidoglycan lyase (EC 4.2.2.-) also known in the literature as peptidoglycan lytic transglycosylase
Vas1_34	GH13_19	8.6e-145	0.993789	GH	Glycoside Hydrolases
Vas1_379	GH23	7.1e-23	0.822222	GH	Glycoside Hydrolases	lysozyme type G (EC 3.2.1.17); peptidoglycan lyase (EC 4.2.2.-) also known in the literature as peptidoglycan lytic transglycosylase
Vas1_561	GH3	7.8e-52	0.976852	GH	Glycoside Hydrolases	beta-glucosidase (EC 3.2.1.21); xylan 1,4-beta-xylosidase (EC 3.2.1.37); beta-N-acetylhexosaminidase (EC 3.2.1.52); glucan 1,3-beta-glucosidase (EC 3.2.1.58); glucan 1,4-beta-glucosidase (EC 3.2.1.74); exo-1,3-1,4-glucanase (EC 3.2.1.-); alphalpha-L-arabinofuranosidase (EC 3.2.1.55).
Vas1_568	GH23	1.7e-28	0.755556	GH	Glycoside Hydrolases	lysozyme type G (EC 3.2.1.17); peptidoglycan lyase (EC 4.2.2.-) also known in the literature as peptidoglycan lytic transglycosylase
Vas1_575	GH23	7.3e-21	0.814815	GH	Glycoside Hydrolases	lysozyme type G (EC 3.2.1.17); peptidoglycan lyase (EC 4.2.2.-) also known in the literature as peptidoglycan lytic transglycosylase
Vas1_647	GH102	3.7e-38	0.675159	GH	Glycoside Hydrolases	peptidoglycan lytic transglycosylase (EC 3.2.1.-)
Vas1_681	GH23	1e-24	0.822222	GH	Glycoside Hydrolases	lysozyme type G (EC 3.2.1.17); peptidoglycan lyase (EC 4.2.2.-) also known in the literature as peptidoglycan lytic transglycosylase
Vas1_720	GH13_29	1.9e-186	0.994203	GH	Glycoside Hydrolases
Vas1_962	GH13_13	1.9e-135	0.994778	GH	Glycoside Hydrolases
Vas2_108	GH43_11	1.9e-139	0.996575	GH	Glycoside Hydrolases
Vas2_1256	GH18	7.2e-76	0.942568	GH	Glycoside Hydrolases	chitinase (EC 3.2.1.14); endo-beta-N-acetylglucosaminidase (EC 3.2.1.96); xylanase inhibitor; concanavalin B; narbonin
Vas2_1261	GH13_9	1.5e-138	0.993127	GH	Glycoside Hydrolases
Vas2_1262	GH77	3.9e-154	0.993927	GH	Glycoside Hydrolases	amylomaltase or 4-alpha-glucanotransferase (EC 2.4.1.25)
Vas2_127	GH5_25	3.2e-73	0.984733	GH	Glycoside Hydrolases
Vas2_1287	GH13_11	7.9e-111	0.99422	GH	Glycoside Hydrolases
Vas2_1290	GH13_37	5.5e-130	0.996552	GH	Glycoside Hydrolases
Vas2_1291	GH13_21	2.2e-111	0.993789	GH	Glycoside Hydrolases
Vas2_1315	GH109	3e-10	0.849206	GH	Glycoside Hydrolases	alpha-N-acetylgalactosaminidase (EC 3.2.1.49)
Vas2_1437	GH109	1.1e-14	0.968254	GH	Glycoside Hydrolases	alpha-N-acetylgalactosaminidase (EC 3.2.1.49)
Vas2_150	GH4	2.8e-65	0.988827	GH	Glycoside Hydrolases	maltose-6-phosphate glucosidase (EC 3.2.1.122); alpha-glucosidase (EC 3.2.1.20); alpha-galactosidase (EC 3.2.1.22); 6-phospho-beta-glucosidase (EC 3.2.1.86); alpha-glucuronidase (EC 3.2.1.139).
Vas2_250	GH8	1.6e-64	0.978125	GH	Glycoside Hydrolases	chitosanase (EC 3.2.1.132); cellulase (EC 3.2.1.4); licheninase (EC 3.2.1.73); endo-1,4-beta-xylanase (EC 3.2.1.8); reducing-end-xylose releasing exo-oligoxylanase (EC 3.2.1.156)
Vas2_301	GH13	9.7e-50	0.936455	GH	Glycoside Hydrolases	alpha-amylase (EC 3.2.1.1); pullulanase (EC 3.2.1.41); cyclomaltodextrin glucanotransferase (EC 2.4.1.19); cyclomaltodextrinase (EC 3.2.1.54); trehalose-6-phosphate hydrolase (EC 3.2.1.93); oligo-alpha-glucosidase (EC 3.2.1.10); maltogenic amylase (EC 3.2.1.133); neopullulanase (EC 3.2.1.135); alpha-glucosidase (EC 3.2.1.20); maltotetraose-forming alpha-amylase (EC 3.2.1.60); isoamylase (EC 3.2.1…
Vas2_434	GH9	3.9e-114	0.992823	GH	Glycoside Hydrolases	endoglucanase (EC 3.2.1.4); cellobiohydrolase (EC 3.2.1.91); beta-glucosidase (EC 3.2.1.21); exo-beta-glucosaminidase (EC 3.2.1.165)
Vas2_57	GH3	6.5e-75	0.986111	GH	Glycoside Hydrolases	beta-glucosidase (EC 3.2.1.21); xylan 1,4-beta-xylosidase (EC 3.2.1.37); beta-N-acetylhexosaminidase (EC 3.2.1.52); glucan 1,3-beta-glucosidase (EC 3.2.1.58); glucan 1,4-beta-glucosidase (EC 3.2.1.74); exo-1,3-1,4-glucanase (EC 3.2.1.-); alphalpha-L-arabinofuranosidase (EC 3.2.1.55).
Vas2_607	GH109	2.4e-08	0.912698	GH	Glycoside Hydrolases	alpha-N-acetylgalactosaminidase (EC 3.2.1.49)
Vas2_61	GH10	7.5e-101	0.980198	GH	Glycoside Hydrolases	endo-1,4-beta-xylanase (EC 3.2.1.8); endo-1,3-beta-xylanase (EC 3.2.1.32)
Vas2_67	GH10	2.1e-104	0.970297	GH	Glycoside Hydrolases	endo-1,4-beta-xylanase (EC 3.2.1.8); endo-1,3-beta-xylanase (EC 3.2.1.32)
Vas2_71	GH36	9e-230	0.985465	GH	Glycoside Hydrolases	alpha-galactosidase (EC 3.2.1.22); alpha-N-acetylgalactosaminidase (EC 3.2.1.49); stachyose synthase (EC 2.4.1.67); raffinose synthase (EC 2.4.1.82)
Vas2_739	GH43_10	5.6e-59	0.996183	GH	Glycoside Hydrolases
Vas2_741	GH88	1.6e-99	0.978723	GH	Glycoside Hydrolases	d-4,5 unsaturated beta-glucuronyl hydrolase (EC 3.2.1.-)
Vas2_758	GH88	1.6e-114	0.978723	GH	Glycoside Hydrolases	d-4,5 unsaturated beta-glucuronyl hydrolase (EC 3.2.1.-)
Vas2_764	GH43_10	1.6e-56	0.992366	GH	Glycoside Hydrolases
Vas2_765	GH78	8.5e-171	0.996032	GH	Glycoside Hydrolases	alpha-L-rhamnosidase (EC 3.2.1.40)
Vas2_768	GH88	5e-122	0.987842	GH	Glycoside Hydrolases	d-4,5 unsaturated beta-glucuronyl hydrolase (EC 3.2.1.-)
Vas2_771	GH88	1.6e-111	0.975684	GH	Glycoside Hydrolases	d-4,5 unsaturated beta-glucuronyl hydrolase (EC 3.2.1.-)
Vas2_79	GH43_1	6.4e-162	0.996774	GH	Glycoside Hydrolases
Vas2_80	GH43_11	7.4e-136	0.996575	GH	Glycoside Hydrolases
Vas2_84	GH3	7.5e-64	0.986111	GH	Glycoside Hydrolases	beta-glucosidase (EC 3.2.1.21); xylan 1,4-beta-xylosidase (EC 3.2.1.37); beta-N-acetylhexosaminidase (EC 3.2.1.52); glucan 1,3-beta-glucosidase (EC 3.2.1.58); glucan 1,4-beta-glucosidase (EC 3.2.1.74); exo-1,3-1,4-glucanase (EC 3.2.1.-); alphalpha-L-arabinofuranosidase (EC 3.2.1.55).
Vas2_844	GH109	0.00025	0.460317	GH	Glycoside Hydrolases	alpha-N-acetylgalactosaminidase (EC 3.2.1.49)
Vas2_850	GH109	7.6e-09	0.666667	GH	Glycoside Hydrolases	alpha-N-acetylgalactosaminidase (EC 3.2.1.49)
Vas2_922	GH16	1e-30	0.984127	GH	Glycoside Hydrolases	xyloglucan:xyloglucosyltransferase (EC 2.4.1.207); keratan-sulfate endo-1,4-beta-galactosidase (EC 3.2.1.103); endo-1,3-beta-glucanase (EC 3.2.1.39); endo-1,3(4)-beta-glucanase (EC 3.2.1.6); licheninase (EC 3.2.1.73); beta-agarase (EC 3.2.1.81); kappa;-carrageenase (EC 3.2.1.83); xyloglucanase (EC 3.2.1.151)
Vas2_927	GH16	1e-33	0.989418	GH	Glycoside Hydrolases	xyloglucan:xyloglucosyltransferase (EC 2.4.1.207); keratan-sulfate endo-1,4-beta-galactosidase (EC 3.2.1.103); endo-1,3-beta-glucanase (EC 3.2.1.39); endo-1,3(4)-beta-glucanase (EC 3.2.1.6); licheninase (EC 3.2.1.73); beta-agarase (EC 3.2.1.81); kappa;-carrageenase (EC 3.2.1.83); xyloglucanase (EC 3.2.1.151)
Vas2_928	GH16	1.8e-32	0.994709	GH	Glycoside Hydrolases	xyloglucan:xyloglucosyltransferase (EC 2.4.1.207); keratan-sulfate endo-1,4-beta-galactosidase (EC 3.2.1.103); endo-1,3-beta-glucanase (EC 3.2.1.39); endo-1,3(4)-beta-glucanase (EC 3.2.1.6); licheninase (EC 3.2.1.73); beta-agarase (EC 3.2.1.81); kappa;-carrageenase (EC 3.2.1.83); xyloglucanase (EC 3.2.1.151)
Vas2_929	GH127	1e-148	0.996183	GH	Glycoside Hydrolases

## Sheet: InterProScan
Related to Figure.1C and D; Figure.3A and B #InterProScan outputs for the protein domains of 72 Glycoside Hydrolases, together with the first two longest CDSs that contain the tandem repeat sequences discussed in manuscript.
Query Protein	Sequence Length	Analysis Signature	Signature Accession	Signature Description	Start location	Stop location	Score	Status of the match (T: true)	InterPro annotations	InterPro annotations description	GO annotations	Pathways annotations
Vas1_1312_GH50	952	Phobius	SIGNAL_PEPTIDE_C_REGION	C-terminal region of a signal peptide.	18	22	-	T
Vas1_1312_GH50	952	ProSiteProfiles	PS51257	Prokaryotic membrane lipoprotein lipid attachment site profile.	1	20	7	T
Vas1_1312_GH50	952	Gene3D	G3DSA:3.20.20.80		423	950	4.5e-189	T
Vas1_1312_GH50	952	Pfam	PF17992	Agarase CBM like domain	252	418	2e-27	T	IPR040669	Agarase, CBM-like domain		MetaCyc: PWY-6815|MetaCyc: PWY-6816
Vas1_1312_GH50	952	Gene3D	G3DSA:2.60.120.430		236	420	1.1e-52	T
Vas1_1312_GH50	952	Gene3D	G3DSA:2.60.120.430		42	171	4.2e-06	T
Vas1_1312_GH50	952	SUPERFAMILY	SSF51445		595	937	1.19e-27	T	IPR017853	Glycoside hydrolase superfamily
Vas1_1312_GH50	952	Phobius	SIGNAL_PEPTIDE_N_REGION	N-terminal region of a signal peptide.	1	5	-	T
Vas1_1312_GH50	952	SignalP_GRAM_NEGATIVE	SignalP-noTM		1	22	-	T
Vas1_1312_GH50	952	Phobius	SIGNAL_PEPTIDE	Signal peptide region	1	22	-	T
Vas1_1312_GH50	952	Pfam	PF02449	Beta-galactosidase	658	842	6.4e-09	T	IPR013529	Glycoside hydrolase, family 42, N-terminal	GO:0004565|GO:0005975|GO:0009341	KEGG: 00052+3.2.1.23|KEGG: 00511+3.2.1.23|KEGG: 00531+3.2.1.23|KEGG: 00600+3.2.1.23|KEGG: 00604+3.2.1.23|MetaCyc: PWY-6807
Vas1_1312_GH50	952	SignalP_EUK	SignalP-noTM		1	19	-	T
Vas1_1312_GH50	952	SignalP_GRAM_POSITIVE	SignalP-TM		1	30	-	T
Vas1_1312_GH50	952	Phobius	SIGNAL_PEPTIDE_H_REGION	Hydrophobic region of a signal peptide.	6	17	-	T
Vas1_1312_GH50	952	Phobius	NON_CYTOPLASMIC_DOMAIN	Region of a membrane-bound protein predicted to be outside the membrane, in the extracellular region.	23	952	-	T
Vas1_1313_GH50	996	SignalP_EUK	SignalP-noTM		1	21	-	T
Vas1_1313_GH50	996	Phobius	SIGNAL_PEPTIDE_C_REGION	C-terminal region of a signal peptide.	14	21	-	T
Vas1_1313_GH50	996	Phobius	SIGNAL_PEPTIDE	Signal peptide region	1	21	-	T
Vas1_1313_GH50	996	Phobius	TRANSMEMBRANE	Region of a membrane-bound protein predicted to be embedded in the membrane.	972	990	-	T
Vas1_1313_GH50	996	MobiDBLite	mobidb-lite	consensus disorder prediction	177	199	-	T
Vas1_1313_GH50	996	Phobius	NON_CYTOPLASMIC_DOMAIN	Region of a membrane-bound protein predicted to be outside the membrane, in the extracellular region.	22	971	-	T
Vas1_1313_GH50	996	Phobius	SIGNAL_PEPTIDE_N_REGION	N-terminal region of a signal peptide.	1	5	-	T
Vas1_1313_GH50	996	Pfam	PF17992	Agarase CBM like domain	214	381	1.7e-11	T	IPR040669	Agarase, CBM-like domain		MetaCyc: PWY-6815|MetaCyc: PWY-6816
Vas1_1313_GH50	996	Gene3D	G3DSA:3.20.20.80		389	911	1.3e-144	T
Vas1_1313_GH50	996	SignalP_GRAM_POSITIVE	SignalP-TM		1	21	-	T
Vas1_1313_GH50	996	Gene3D	G3DSA:2.60.120.260		23	176	1.2e-05	T	IPR008979	Galactose-binding-like domain superfamily
Vas1_1313_GH50	996	Phobius	SIGNAL_PEPTIDE_H_REGION	Hydrophobic region of a signal peptide.	6	13	-	T
Vas1_1313_GH50	996	SignalP_GRAM_NEGATIVE	SignalP-noTM		1	21	-	T
Vas1_1313_GH50	996	Gene3D	G3DSA:2.60.120.430		208	388	4.9e-12	T
Vas1_1313_GH50	996	SUPERFAMILY	SSF51445		543	894	3.87e-17	T	IPR017853	Glycoside hydrolase superfamily
Vas1_1313_GH50	996	MobiDBLite	mobidb-lite	consensus disorder prediction	949	975	-	T
Vas1_1313_GH50	996	Phobius	CYTOPLASMIC_DOMAIN	Region of a membrane-bound protein predicted to be outside the membrane, in the cytoplasm.	991	996	-	T
Vas1_1314_GH50	970	Gene3D	G3DSA:3.20.20.80		423	965	6.3e-189	T
Vas1_1314_GH50	970	SignalP_GRAM_POSITIVE	SignalP-TM		1	25	-	T
Vas1_1314_GH50	970	Phobius	SIGNAL_PEPTIDE_H_REGION	Hydrophobic region of a signal peptide.	7	18	-	T
Vas1_1314_GH50	970	Gene3D	G3DSA:2.60.120.430		229	420	4.9e-45	T
Vas1_1314_GH50	970	SignalP_GRAM_NEGATIVE	SignalP-noTM		1	23	-	T
Vas1_1314_GH50	970	Pfam	PF17992	Agarase CBM like domain	232	418	1.2e-23	T	IPR040669	Agarase, CBM-like domain		MetaCyc: PWY-6815|MetaCyc: PWY-6816
Vas1_1314_GH50	970	Phobius	SIGNAL_PEPTIDE_C_REGION	C-terminal region of a signal peptide.	19	23	-	T
Vas1_1314_GH50	970	Pfam	PF02449	Beta-galactosidase	677	849	3.8e-06	T	IPR013529	Glycoside hydrolase, family 42, N-terminal	GO:0004565|GO:0005975|GO:0009341	KEGG: 00052+3.2.1.23|KEGG: 00511+3.2.1.23|KEGG: 00531+3.2.1.23|KEGG: 00600+3.2.1.23|KEGG: 00604+3.2.1.23|MetaCyc: PWY-6807
Vas1_1314_GH50	970	Phobius	SIGNAL_PEPTIDE	Signal peptide region	1	23	-	T
Vas1_1314_GH50	970	Phobius	SIGNAL_PEPTIDE_N_REGION	N-terminal region of a signal peptide.	1	6	-	T
Vas1_1314_GH50	970	Phobius	NON_CYTOPLASMIC_DOMAIN	Region of a membrane-bound protein predicted to be outside the membrane, in the extracellular region.	24	970	-	T
Vas1_1314_GH50	970	SUPERFAMILY	SSF51445		610	955	4.5e-26	T	IPR017853	Glycoside hydrolase superfamily
Vas1_1314_GH50	970	SignalP_EUK	SignalP-noTM		1	23	-	T
Vas1_1317_GH50	744	Pfam	PF17992	Agarase CBM like domain	22	202	2.5e-53	T	IPR040669	Agarase, CBM-like domain		MetaCyc: PWY-6815|MetaCyc: PWY-6816
Vas1_1317_GH50	744	Pfam	PF02449	Beta-galactosidase	458	627	2.8e-05	T	IPR013529	Glycoside hydrolase, family 42, N-terminal	GO:0004565|GO:0005975|GO:0009341	KEGG: 00052+3.2.1.23|KEGG: 00511+3.2.1.23|KEGG: 00531+3.2.1.23|KEGG: 00600+3.2.1.23|KEGG: 00604+3.2.1.23|MetaCyc: PWY-6807
Vas1_1317_GH50	744	Gene3D	G3DSA:3.20.20.80		203	742	9.2e-195	T
Vas1_1317_GH50	744	SUPERFAMILY	SSF51445		427	732	5.72e-26	T	IPR017853	Glycoside hydrolase superfamily
Vas1_1317_GH50	744	Gene3D	G3DSA:2.60.120.430		19	201	9e-58	T
Vas1_1339_GH16	452	Phobius	SIGNAL_PEPTIDE_C_REGION	C-terminal region of a signal peptide.	18	22	-	T
Vas1_1339_GH16	452	SignalP_EUK	SignalP-noTM		1	22	-	T
Vas1_1339_GH16	452	CDD	cd02178	GH16_beta_agarase	21	296	8.71013e-90	T	IPR016287	Beta-agarase	GO:0033916
Vas1_1339_GH16	452	Gene3D	G3DSA:2.60.120.200		18	296	7.8e-88	T
Vas1_1339_GH16	452	PANTHER	PTHR10963:SF55		39	295	1.7e-19	T
Vas1_1339_GH16	452	PANTHER	PTHR10963		39	295	1.7e-19	T
Vas1_1339_GH16	452	CDD	cd00161	RICIN	320	450	5.95459e-22	T	IPR000772	Ricin B, lectin domain
Vas1_1339_GH16	452	ProSiteProfiles	PS50231	Lectin domain of ricin B chain profile.	309	451	23.856	T	IPR000772	Ricin B, lectin domain
Vas1_1339_GH16	452	SignalP_GRAM_NEGATIVE	SignalP-noTM		1	22	-	T
Vas1_1339_GH16	452	SMART	SM00458		311	451	1.7e-17	T	IPR000772	Ricin B, lectin domain
Vas1_1339_GH16	452	SUPERFAMILY	SSF49899		22	298	2.88e-63	T	IPR013320	Concanavalin A-like lectin/glucanase domain superfamily
Vas1_1339_GH16	452	SignalP_GRAM_POSITIVE	SignalP-TM		1	22	-	T
Vas1_1339_GH16	452	Phobius	SIGNAL_PEPTIDE	Signal peptide region	1	22	-	T
Vas1_1339_GH16	452	SUPERFAMILY	SSF50370		287	447	7.8e-32	T	IPR035992	Ricin B-like lectins
Vas1_1339_GH16	452	Phobius	SIGNAL_PEPTIDE_H_REGION	Hydrophobic region of a signal peptide.	7	17	-	T
Vas1_1339_GH16	452	Pfam	PF00652	Ricin-type beta-trefoil lectin domain	318	447	1.1e-20	T	IPR000772	Ricin B, lectin domain
Vas1_1339_GH16	452	ProSiteProfiles	PS51762	Glycosyl hydrolases family 16 (GH16) domain profile.	23	300	25.716	T	IPR000757	Glycoside hydrolase family 16	GO:0004553|GO:0005975
Vas1_1339_GH16	452	Phobius	SIGNAL_PEPTIDE_N_REGION	N-terminal region of a signal peptide.	1	6	-	T
Vas1_1339_GH16	452	Phobius	NON_CYTOPLASMIC_DOMAIN	Region of a membrane-bound protein predicted to be outside the membrane, in the extracellular region.	23	452	-	T
Vas1_1339_GH16	452	Gene3D	G3DSA:2.80.10.50		297	451	9.1e-33	T
Vas2_922_GH16	305	Phobius	SIGNAL_PEPTIDE_H_REGION	Hydrophobic region of a signal peptide.	11	22	-	T
Vas2_922_GH16	305	Phobius	SIGNAL_PEPTIDE_C_REGION	C-terminal region of a signal peptide.	23	28	-	T
Vas2_922_GH16	305	SUPERFAMILY	SSF49899		36	301	3.04e-48	T	IPR013320	Concanavalin A-like lectin/glucanase domain superfamily
Vas2_922_GH16	305	PANTHER	PTHR31062		58	302	5.7e-43	T
Vas2_922_GH16	305	Phobius	SIGNAL_PEPTIDE	Signal peptide region	1	28	-	T
Vas2_922_GH16	305	SignalP_EUK	SignalP-noTM		1	28	-	T
Vas2_922_GH16	305	PANTHER	PTHR31062:SF143		58	302	5.7e-43	T
Vas2_922_GH16	305	ProSiteProfiles	PS51762	Glycosyl hydrolases family 16 (GH16) domain profile.	41	305	23.447	T	IPR000757	Glycoside hydrolase family 16	GO:0004553|GO:0005975
Vas2_922_GH16	305	Phobius	SIGNAL_PEPTIDE_N_REGION	N-terminal region of a signal peptide.	1	10	-	T
Vas2_922_GH16	305	Phobius	NON_CYTOPLASMIC_DOMAIN	Region of a membrane-bound protein predicted to be outside the membrane, in the extracellular region.	29	305	-	T
Vas2_922_GH16	305	Gene3D	G3DSA:2.60.120.200		32	301	9.6e-68	T
Vas2_922_GH16	305	Pfam	PF00722	Glycosyl hydrolases family 16	71	267	2.5e-16	T	IPR000757	Glycoside hydrolase family 16	GO:0004553|GO:0005975
Vas2_922_GH16	305	SignalP_GRAM_NEGATIVE	SignalP-noTM		1	28	-	T
Vas2_922_GH16	305	SignalP_GRAM_POSITIVE	SignalP-TM		1	28	-	T
Vas2_927_GH16	303	SignalP_EUK	SignalP-TM		1	28	-	T
Vas2_927_GH16	303	PANTHER	PTHR31062		25	299	3.1e-45	T
Vas2_927_GH16	303	Phobius	NON_CYTOPLASMIC_DOMAIN	Region of a membrane-bound protein predicted to be outside the membrane, in the extracellular region.	29	303	-	T
Vas2_927_GH16	303	Phobius	SIGNAL_PEPTIDE	Signal peptide region	1	28	-	T
Vas2_927_GH16	303	PANTHER	PTHR31062:SF143		25	299	3.1e-45	T
Vas2_927_GH16	303	Pfam	PF00722	Glycosyl hydrolases family 16	70	266	5.7e-19	T	IPR000757	Glycoside hydrolase family 16	GO:0004553|GO:0005975
Vas2_927_GH16	303	Phobius	SIGNAL_PEPTIDE_N_REGION	N-terminal region of a signal peptide.	1	10	-	T
Vas2_927_GH16	303	Phobius	SIGNAL_PEPTIDE_C_REGION	C-terminal region of a signal peptide.	24	28	-	T
Vas2_927_GH16	303	Gene3D	G3DSA:2.60.120.200		31	302	1.6e-70	T
Vas2_927_GH16	303	SignalP_GRAM_NEGATIVE	SignalP-noTM		1	28	-	T
Vas2_927_GH16	303	ProSiteProfiles	PS51762	Glycosyl hydrolases family 16 (GH16) domain profile.	25	303	24.858	T	IPR000757	Glycoside hydrolase family 16	GO:0004553|GO:0005975
Vas2_927_GH16	303	SUPERFAMILY	SSF49899		32	301	1.92e-50	T	IPR013320	Concanavalin A-like lectin/glucanase domain superfamily
Vas2_927_GH16	303	Phobius	SIGNAL_PEPTIDE_H_REGION	Hydrophobic region of a signal peptide.	11	23	-	T
Vas2_927_GH16	303	SignalP_GRAM_POSITIVE	SignalP-TM		1	28	-	T
Vas2_928_GH16	625	SignalP_GRAM_POSITIVE	SignalP-TM		1	20	-	T
Vas2_928_GH16	625	PANTHER	PTHR31062:SF143		41	315	3.7e-34	T
Vas2_928_GH16	625	Gene3D	G3DSA:2.60.120.200		29	319	2.1e-55	T
Vas2_928_GH16	625	ProSiteProfiles	PS51762	Glycosyl hydrolases family 16 (GH16) domain profile.	33	322	21.913	T	IPR000757	Glycoside hydrolase family 16	GO:0004553|GO:0005975
Vas2_928_GH16	625	SMART	SM00635		455	529	4.5e-16	T	IPR003343	Bacterial Ig-like, group 2
Vas2_928_GH16	625	SMART	SM00635		544	621	7.9e-15	T	IPR003343	Bacterial Ig-like, group 2
Vas2_928_GH16	625	Phobius	NON_CYTOPLASMIC_DOMAIN	Region of a membrane-bound protein predicted to be outside the membrane, in the extracellular region.	21	625	-	T
Vas2_928_GH16	625	SUPERFAMILY	SSF49373		454	533	8.24e-15	T	IPR008964	Invasin/intimin cell-adhesion fragments
Vas2_928_GH16	625	Pfam	PF02368	Bacterial Ig-like domain (group 2)	455	526	4.2e-15	T	IPR003343	Bacterial Ig-like, group 2
Vas2_928_GH16	625	Pfam	PF02368	Bacterial Ig-like domain (group 2)	544	621	6.4e-15	T	IPR003343	Bacterial Ig-like, group 2
Vas2_928_GH16	625	SignalP_EUK	SignalP-noTM		1	20	-	T
Vas2_928_GH16	625	SUPERFAMILY	SSF49899		42	318	4.3e-37	T	IPR013320	Concanavalin A-like lectin/glucanase domain superfamily
Vas2_928_GH16	625	Phobius	SIGNAL_PEPTIDE_N_REGION	N-terminal region of a signal peptide.	1	5	-	T
Vas2_928_GH16	625	Phobius	SIGNAL_PEPTIDE_C_REGION	C-terminal region of a signal peptide.	16	20	-	T
Vas2_928_GH16	625	Phobius	SIGNAL_PEPTIDE	Signal peptide region	1	20	-	T
Vas2_928_GH16	625	Gene3D	G3DSA:2.60.40.1080		542	625	8.1e-23	T
Vas2_928_GH16	625	Gene3D	G3DSA:2.60.40.1080		452	536	2.5e-19	T
Vas2_928_GH16	625	SUPERFAMILY	SSF49373		543	624	2.59e-17	T	IPR008964	Invasin/intimin cell-adhesion fragments
Vas2_928_GH16	625	Pfam	PF00722	Glycosyl hydrolases family 16	67	263	1.4e-13	T	IPR000757	Glycoside hydrolase family 16	GO:0004553|GO:0005975
Vas2_928_GH16	625	SignalP_GRAM_NEGATIVE	SignalP-noTM		1	20	-	T
Vas2_928_GH16	625	PANTHER	PTHR31062		41	315	3.7e-34	T
Vas2_928_GH16	625	Phobius	SIGNAL_PEPTIDE_H_REGION	Hydrophobic region of a signal peptide.	6	15	-	T
Vas1_1058_GH13	458	PRINTS	PR00110	Alpha-amylase signature	55	72	2.7e-15	T	IPR006046	Alpha amylase	GO:0003824|GO:0005975|GO:0043169	KEGG: 00500+3.2.1.1|Reactome: R-HSA-189085
Vas1_1058_GH13	458	PRINTS	PR00110	Alpha-amylase signature	88	99	2.7e-15	T	IPR006046	Alpha amylase	GO:0003824|GO:0005975|GO:0043169	KEGG: 00500+3.2.1.1|Reactome: R-HSA-189085
Vas1_1058_GH13	458	PRINTS	PR00110	Alpha-amylase signature	296	308	2.7e-15	T	IPR006046	Alpha amylase	GO:0003824|GO:0005975|GO:0043169	KEGG: 00500+3.2.1.1|Reactome: R-HSA-189085
Vas1_1058_GH13	458	PRINTS	PR00110	Alpha-amylase signature	201	212	2.7e-15	T	IPR006046	Alpha amylase	GO:0003824|GO:0005975|GO:0043169	KEGG: 00500+3.2.1.1|Reactome: R-HSA-189085
Vas1_1058_GH13	458	PRINTS	PR00110	Alpha-amylase signature	230	248	2.7e-15	T	IPR006046	Alpha amylase	GO:0003824|GO:0005975|GO:0043169	KEGG: 00500+3.2.1.1|Reactome: R-HSA-189085
Vas1_1058_GH13	458	SUPERFAMILY	SSF51011		404	454	1.56e-05	T
Vas1_1058_GH13	458	PANTHER	PTHR43447:SF8		8	417	2e-54	T
Vas1_1058_GH13	458	PANTHER	PTHR43447		8	417	2e-54	T
Vas1_1058_GH13	458	SMART	SM00642		10	374	7.3e-24	T	IPR006047	Glycosyl hydrolase, family 13, catalytic domain	GO:0003824|GO:0005975
Vas1_1058_GH13	458	SUPERFAMILY	SSF51445		4	344	1.61e-58	T	IPR017853	Glycoside hydrolase superfamily
Vas1_1058_GH13	458	Pfam	PF00128	Alpha amylase, catalytic domain	33	257	3.8e-18	T	IPR006047	Glycosyl hydrolase, family 13, catalytic domain	GO:0003824|GO:0005975
Vas1_1058_GH13	458	CDD	cd11315	AmyAc_bac1_AmyA	11	384	1.04834e-142	T
Vas1_1058_GH13	458	Gene3D	G3DSA:2.60.40.1180		383	454	3.2e-06	T	IPR013780	Glycosyl hydrolase, all-beta
Vas1_1058_GH13	458	Gene3D	G3DSA:3.20.20.80		3	366	3.3e-70	T	IPR013781	Glycoside hydrolase, catalytic domain	GO:0005975
Vas1_1120_GH1	476	ProSitePatterns	PS00653	Glycosyl hydrolases family 1 N-terminal signature.	10	24	-	T	IPR033132	Glycosyl hydrolases family 1, N-terminal conserved site
Vas1_1120_GH1	476	SUPERFAMILY	SSF51445		4	474	1.81e-159	T	IPR017853	Glycoside hydrolase superfamily
Vas1_1120_GH1	476	PANTHER	PTHR10353:SF117		1	474	5.1e-234	T
Vas1_1120_GH1	476	PANTHER	PTHR10353		1	474	5.1e-234	T	IPR001360	Glycoside hydrolase family 1	GO:0004553|GO:0005975
Vas1_1120_GH1	476	Gene3D	G3DSA:3.20.20.80		5	475	2.9e-150	T	IPR013781	Glycoside hydrolase, catalytic domain	GO:0005975
Vas1_1120_GH1	476	ProSitePatterns	PS00572	Glycosyl hydrolases family 1 active site.	370	378	-	T	IPR018120	Glycoside hydrolase family 1, active site
Vas1_1120_GH1	476	PRINTS	PR00131	Glycosyl hydrolase family 1 signature	304	318	2e-14	T	IPR001360	Glycoside hydrolase family 1	GO:0004553|GO:0005975
Vas1_1120_GH1	476	PRINTS	PR00131	Glycosyl hydrolase family 1 signature	370	378	2e-14	T	IPR001360	Glycoside hydrolase family 1	GO:0004553|GO:0005975
Vas1_1120_GH1	476	PRINTS	PR00131	Glycosyl hydrolase family 1 signature	391	402	2e-14	T	IPR001360	Glycoside hydrolase family 1	GO:0004553|GO:0005975
Vas1_1120_GH1	476	PRINTS	PR00131	Glycosyl hydrolase family 1 signature	437	449	2e-14	T	IPR001360	Glycoside hydrolase family 1	GO:0004553|GO:0005975
Vas1_1120_GH1	476	PRINTS	PR00131	Glycosyl hydrolase family 1 signature	412	429	2e-14	T	IPR001360	Glycoside hydrolase family 1	GO:0004553|GO:0005975
Vas1_1120_GH1	476	Pfam	PF00232	Glycosyl hydrolase family 1	4	472	4.5e-137	T	IPR001360	Glycoside hydrolase family 1	GO:0004553|GO:0005975
Vas1_1280_GH3	1085	PANTHER	PTHR30620		50	678	3.6e-161	T
Vas1_1280_GH3	1085	SUPERFAMILY	SSF49785		937	1085	9.35e-08	T	IPR008979	Galactose-binding domain-like
Vas1_1280_GH3	1085	SignalP_EUK	SignalP-noTM		1	16	-	T
Vas1_1280_GH3	1085	SUPERFAMILY	SSF51445		51	445	4.21e-102	T	IPR017853	Glycoside hydrolase superfamily
Vas1_1280_GH3	1085	Gene3D	G3DSA:3.40.50.1700		432	673	2.4e-48	T	IPR002772	Glycoside hydrolase family 3 C-terminal domain	GO:0004553|GO:0005975
Vas1_1280_GH3	1085	SignalP_GRAM_POSITIVE	SignalP-TM		1	25	-	T
Vas1_1280_GH3	1085	Gene3D	G3DSA:3.20.20.300		54	419	9.3e-103	T	IPR001764	Glycoside hydrolase, family 3, N-terminal	GO:0004553|GO:0005975
Vas1_1280_GH3	1085	PRINTS	PR00133	Glycosyl hydrolase family 3 signature	204	220	5.5e-21	T	IPR001764	Glycoside hydrolase, family 3, N-terminal	GO:0004553|GO:0005975
Vas1_1280_GH3	1085	PRINTS	PR00133	Glycosyl hydrolase family 3 signature	243	259	5.5e-21	T	IPR001764	Glycoside hydrolase, family 3, N-terminal	GO:0004553|GO:0005975
Vas1_1280_GH3	1085	PRINTS	PR00133	Glycosyl hydrolase family 3 signature	326	344	5.5e-21	T	IPR001764	Glycoside hydrolase, family 3, N-terminal	GO:0004553|GO:0005975
Vas1_1280_GH3	1085	PRINTS	PR00133	Glycosyl hydrolase family 3 signature	158	177	5.5e-21	T	IPR001764	Glycoside hydrolase, family 3, N-terminal	GO:0004553|GO:0005975
Vas1_1280_GH3	1085	PRINTS	PR00133	Glycosyl hydrolase family 3 signature	134	150	5.5e-21	T	IPR001764	Glycoside hydrolase, family 3, N-terminal	GO:0004553|GO:0005975
Vas1_1280_GH3	1085	SUPERFAMILY	SSF52279		446	676	8.63e-37	T	IPR002772	Glycoside hydrolase family 3 C-terminal domain	GO:0004553|GO:0005975
Vas1_1280_GH3	1085	SignalP_GRAM_NEGATIVE	SignalP-noTM		1	23	-	T
Vas1_1280_GH3	1085	Pfam	PF00933	Glycosyl hydrolase family 3 N terminal domain	67	405	7.6e-79	T	IPR001764	Glycoside hydrolase, family 3, N-terminal	GO:0004553|GO:0005975
Vas1_1280_GH3	1085	SUPERFAMILY	SSF49785		758	886	2.47e-07	T	IPR008979	Galactose-binding domain-like
Vas1_1280_GH3	1085	Pfam	PF01915	Glycosyl hydrolase family 3 C-terminal domain	446	675	1.7e-27	T	IPR002772	Glycoside hydrolase family 3 C-terminal domain	GO:0004553|GO:0005975
Vas1_1280_GH3	1085	ProSiteProfiles	PS51257	Prokaryotic membrane lipoprotein lipid attachment site profile.	1	20	6	T
Vas1_1309_GH2	809	SUPERFAMILY	SSF51445		458	586	5.28e-61	T	IPR017853	Glycoside hydrolase superfamily
Vas1_1309_GH2	809	SUPERFAMILY	SSF51445		264	412	5.28e-61	T	IPR017853	Glycoside hydrolase superfamily
Vas1_1309_GH2	809	Gene3D	G3DSA:3.20.20.80		273	416	3.4e-68	T	IPR013781	Glycoside hydrolase, catalytic domain	GO:0005975
Vas1_1309_GH2	809	Gene3D	G3DSA:3.20.20.80		458	588	3.4e-68	T	IPR013781	Glycoside hydrolase, catalytic domain	GO:0005975
Vas1_1309_GH2	809	PRINTS	PR00132	Glycosyl hydrolase family 2 signature	278	292	1.4e-06	T	IPR006101	Glycoside hydrolase, family 2	GO:0004553|GO:0005975	KEGG: 00052+3.2.1.23|KEGG: 00511+3.2.1.23|KEGG: 00531+3.2.1.23|KEGG: 00600+3.2.1.23|KEGG: 00604+3.2.1.23|MetaCyc: PWY-6807|Reactome: R-HSA-2024096|Reactome: R-HSA-2160916|Reactome: R-HSA-6798695
Vas1_1309_GH2	809	PRINTS	PR00132	Glycosyl hydrolase family 2 signature	309	327	1.4e-06	T	IPR006101	Glycoside hydrolase, family 2	GO:0004553|GO:0005975	KEGG: 00052+3.2.1.23|KEGG: 00511+3.2.1.23|KEGG: 00531+3.2.1.23|KEGG: 00600+3.2.1.23|KEGG: 00604+3.2.1.23|MetaCyc: PWY-6807|Reactome: R-HSA-2024096|Reactome: R-HSA-2160916|Reactome: R-HSA-6798695
Vas1_1309_GH2	809	PRINTS	PR00132	Glycosyl hydrolase family 2 signature	392	407	1.4e-06	T	IPR006101	Glycoside hydrolase, family 2	GO:0004553|GO:0005975	KEGG: 00052+3.2.1.23|KEGG: 00511+3.2.1.23|KEGG: 00531+3.2.1.23|KEGG: 00600+3.2.1.23|KEGG: 00604+3.2.1.23|MetaCyc: PWY-6807|Reactome: R-HSA-2024096|Reactome: R-HSA-2160916|Reactome: R-HSA-6798695
Vas1_1309_GH2	809	PANTHER	PTHR42732		529	798	2.3e-144	T
Vas1_1309_GH2	809	Gene3D	G3DSA:2.60.40.1560		631	713	2.5e-13	T
Vas1_1309_GH2	809	Pfam	PF16355	Domain of unknown function (DUF4982)	642	699	2.1e-10	T	IPR032311	Domain of unknown function DUF4982		KEGG: 00052+3.2.1.23|KEGG: 00511+3.2.1.23|KEGG: 00531+3.2.1.23|KEGG: 00600+3.2.1.23|KEGG: 00604+3.2.1.23|MetaCyc: PWY-6807
Vas1_1309_GH2	809	Gene3D	G3DSA:2.60.40.320		141	267	3e-19	T	IPR013812	Glycoside hydrolase, family 2/20, immunoglobulin-like beta-sandwich domain	GO:0004553|GO:0005975
Vas1_1309_GH2	809	SUPERFAMILY	SSF49303		170	266	1.32e-12	T	IPR006102	Glycoside hydrolase, family 2, immunoglobulin-like beta-sandwich	GO:0004553|GO:0005975
Vas1_1309_GH2	809	Pfam	PF00703	Glycosyl hydrolases family 2	181	266	1.6e-11	T	IPR006102	Glycoside hydrolase, family 2, immunoglobulin-like beta-sandwich	GO:0004553|GO:0005975
Vas1_1309_GH2	809	Pfam	PF02837	Glycosyl hydrolases family 2, sugar binding domain	11	148	4.7e-20	T	IPR006104	Glycosyl hydrolases family 2, sugar binding domain	GO:0004553|GO:0005975	KEGG: 00052+3.2.1.23|KEGG: 00511+3.2.1.23|KEGG: 00531+3.2.1.23|KEGG: 00600+3.2.1.23|KEGG: 00604+3.2.1.23|MetaCyc: PWY-6807
Vas1_1309_GH2	809	Gene3D	G3DSA:2.60.120.260		7	140	4.5e-33	T	IPR008979	Galactose-binding domain-like
Vas1_1309_GH2	809	Pfam	PF02836	Glycosyl hydrolases family 2, TIM barrel domain	274	410	1.1e-19	T	IPR006103	Glycoside hydrolase family 2, catalytic domain	GO:0004553|GO:0005975	KEGG: 00052+3.2.1.23|KEGG: 00511+3.2.1.23|KEGG: 00531+3.2.1.23|KEGG: 00600+3.2.1.23|KEGG: 00604+3.2.1.23|MetaCyc: PWY-6807|Reactome: R-HSA-6798695
Vas1_1309_GH2	809	SUPERFAMILY	SSF49785		6	151	6.66e-33	T	IPR008979	Galactose-binding domain-like
Vas1_1310_GH117	360	PANTHER	PTHR35279:SF2		190	240	5e-13	T
Vas1_1310_GH117	360	Gene3D	G3DSA:2.115.10.20		211	293	3.3e-08	T	IPR023296	Glycosyl hydrolase, five-bladed beta-propellor domain
Vas1_1310_GH117	360	SUPERFAMILY	SSF75005		49	305	4.52e-39	T	IPR023296	Glycosyl hydrolase, five-bladed beta-propellor domain
Vas1_1310_GH117	360	Gene3D	G3DSA:2.115.10.20		48	210	2.6e-22	T	IPR023296	Glycosyl hydrolase, five-bladed beta-propellor domain
Vas1_1310_GH117	360	Pfam	PF04616	Glycosyl hydrolases family 43	71	173	2e-08	T	IPR006710	Glycoside hydrolase, family 43	GO:0004553|GO:0005975
Vas1_1310_GH117	360	PANTHER	PTHR35279		190	240	5e-13	T
Vas1_1435_GH73	261	PANTHER	PTHR40572		14	255	1.6e-73	T
Vas1_1435_GH73	261	PANTHER	PTHR40572:SF2		14	255	1.6e-73	T
Vas1_1435_GH73	261	Pfam	PF01832	Mannosyl-glycoprotein endo-beta-N-acetylglucosaminidase	115	250	2.1e-13	T	IPR002901	Mannosyl-glycoprotein endo-beta-N-acetylglucosamidase-like domain	GO:0004040
Vas1_1562_GH26	479	SUPERFAMILY	SSF49785		362	477	7.65e-07	T	IPR008979	Galactose-binding domain-like
Vas1_1562_GH26	479	ProSiteProfiles	PS51257	Prokaryotic membrane lipoprotein lipid attachment site profile.	1	17	5	T
Vas1_1562_GH26	479	PANTHER	PTHR40079:SF4		50	275	2.6e-15	T
Vas1_1562_GH26	479	CDD	cd02795	CBM6-CBM35-CBM36_like	362	476	9.99119e-06	T
Vas1_1562_GH26	479	PANTHER	PTHR40079		50	275	2.6e-15	T	IPR000805	Glycoside hydrolase family 26	GO:0006080|GO:0016985	KEGG: 00051+3.2.1.78|MetaCyc: PWY-7456
Vas1_1562_GH26	479	SUPERFAMILY	SSF51445		117	307	5.36e-31	T	IPR017853	Glycoside hydrolase superfamily
Vas1_1562_GH26	479	SignalP_EUK	SignalP-noTM		1	19	-	T
Vas1_1562_GH26	479	Pfam	PF02156	Glycosyl hydrolase family 26	115	287	3.5e-07	T	IPR022790	Glycosyl hydrolase family 26 domain	GO:0004553
Vas1_1562_GH26	479	Gene3D	G3DSA:3.20.20.80		119	320	3.5e-25	T	IPR013781	Glycoside hydrolase, catalytic domain	GO:0005975
Vas1_1562_GH26	479	ProSiteProfiles	PS51764	Glycosyl hydrolases family 26 (GH26) domain profile.	1	320	25.309	T	IPR022790	Glycosyl hydrolase family 26 domain	GO:0004553
Vas1_1562_GH26	479	SignalP_GRAM_POSITIVE	SignalP-TM		1	22	-	T
Vas1_1621_GH117	381	SUPERFAMILY	SSF75005		169	262	8.04e-15	T	IPR023296	Glycosyl hydrolase, five-bladed beta-propellor domain
Vas1_1621_GH117	381	SUPERFAMILY	SSF75005		37	118	8.04e-15	T	IPR023296	Glycosyl hydrolase, five-bladed beta-propellor domain
Vas1_1621_GH117	381	Gene3D	G3DSA:2.115.10.20		37	116	5.2e-09	T	IPR023296	Glycosyl hydrolase, five-bladed beta-propellor domain
Vas1_1621_GH117	381	Gene3D	G3DSA:2.115.10.20		163	224	5.2e-09	T	IPR023296	Glycosyl hydrolase, five-bladed beta-propellor domain
Vas1_1621_GH117	381	Gene3D	G3DSA:2.115.10.20		225	256	0.00023	T	IPR023296	Glycosyl hydrolase, five-bladed beta-propellor domain
Vas1_1621_GH117	381	CDD	cd08994	GH43_like_2	17	359	5.47608e-71	T
Vas1_1669_GH2	787	PANTHER	PTHR43730		8	743	9.7e-92	T
Vas1_1669_GH2	787	SUPERFAMILY	SSF51445		303	645	1.83e-62	T	IPR017853	Glycoside hydrolase superfamily
Vas1_1669_GH2	787	SUPERFAMILY	SSF49785		12	191	1.58e-41	T	IPR008979	Galactose-binding domain-like
Vas1_1669_GH2	787	Gene3D	G3DSA:3.20.20.80		306	544	1.5e-38	T	IPR013781	Glycoside hydrolase, catalytic domain	GO:0005975
Vas1_1669_GH2	787	Gene3D	G3DSA:3.20.20.80		581	647	1.5e-38	T	IPR013781	Glycoside hydrolase, catalytic domain	GO:0005975
Vas1_1669_GH2	787	Gene3D	G3DSA:2.60.120.260		6	181	1.8e-37	T	IPR008979	Galactose-binding domain-like
Vas1_1669_GH2	787	Pfam	PF02837	Glycosyl hydrolases family 2, sugar binding domain	80	152	7.6e-13	T	IPR006104	Glycosyl hydrolases family 2, sugar binding domain	GO:0004553|GO:0005975	KEGG: 00052+3.2.1.23|KEGG: 00511+3.2.1.23|KEGG: 00531+3.2.1.23|KEGG: 00600+3.2.1.23|KEGG: 00604+3.2.1.23|MetaCyc: PWY-6807
Vas1_1669_GH2	787	SUPERFAMILY	SSF49303		194	306	1.4e-16	T	IPR006102	Glycoside hydrolase, family 2, immunoglobulin-like beta-sandwich	GO:0004553|GO:0005975
Vas1_1669_GH2	787	Gene3D	G3DSA:2.60.40.320		182	305	7.9e-16	T	IPR013812	Glycoside hydrolase, family 2/20, immunoglobulin-like beta-sandwich domain	GO:0004553|GO:0005975
Vas1_1669_GH2	787	Pfam	PF00703	Glycosyl hydrolases family 2	194	306	5.5e-12	T	IPR006102	Glycoside hydrolase, family 2, immunoglobulin-like beta-sandwich	GO:0004553|GO:0005975
Vas1_1669_GH2	787	Pfam	PF02836	Glycosyl hydrolases family 2, TIM barrel domain	358	443	2.2e-05	T	IPR006103	Glycoside hydrolase family 2, catalytic domain	GO:0004553|GO:0005975	KEGG: 00052+3.2.1.23|KEGG: 00511+3.2.1.23|KEGG: 00531+3.2.1.23|KEGG: 00600+3.2.1.23|KEGG: 00604+3.2.1.23|MetaCyc: PWY-6807|Reactome: R-HSA-6798695
Vas1_1780_GH36	578	Gene3D	G3DSA:3.20.20.70		189	489	9.2e-45	T	IPR013785	Aldolase-type TIM barrel	GO:0003824
Vas1_1780_GH36	578	CDD	cd14791	GH36	194	492	3.28214e-76	T
Vas1_1780_GH36	578	Pfam	PF02065	Melibiase	162	351	7.9e-17	T	IPR002252	Glycoside hydrolase family 36	GO:0004557|GO:0005975	KEGG: 00052+3.2.1.22|KEGG: 00561+3.2.1.22|KEGG: 00600+3.2.1.22|KEGG: 00603+3.2.1.22|MetaCyc: PWY-6527
Vas1_1780_GH36	578	SUPERFAMILY	SSF51445		194	535	2.33e-75	T	IPR017853	Glycoside hydrolase superfamily
Vas1_1780_GH36	578	PANTHER	PTHR43053		424	454	3.4e-58	T
Vas1_1780_GH36	578	PANTHER	PTHR43053:SF6		424	454	3.4e-58	T
Vas1_1781_GH103	323	Pfam	PF13406	Transglycosylase SLT domain	24	319	1.1e-108	T	IPR031304	Transglycosylase SLT domain 2
Vas1_1781_GH103	323	CDD	cd00254	LT_GEWL	169	234	4.02026e-06	T
Vas1_1781_GH103	323	PANTHER	PTHR30163:SF5		12	321	3e-113	T
Vas1_1781_GH103	323	SignalP_EUK	SignalP-noTM		1	19	-	T
Vas1_1781_GH103	323	Gene3D	G3DSA:1.10.530.10		68	124	1.2e-60	T
Vas1_1781_GH103	323	Gene3D	G3DSA:1.10.530.10		205	321	1.2e-60	T
Vas1_1781_GH103	323	PANTHER	PTHR30163		12	321	3e-113	T
Vas1_1781_GH103	323	SignalP_GRAM_NEGATIVE	SignalP-noTM		1	19	-	T
Vas1_1781_GH103	323	TIGRFAM	TIGR02283	MltB_2: lytic murein transglycosylase	23	321	1.7e-111	T	IPR011970	Lytic murein transglycosylase
Vas1_1781_GH103	323	SUPERFAMILY	SSF53955		11	321	1.56e-100	T	IPR023346	Lysozyme-like domain
Vas1_1937_GH36	705	Pfam	PF16874	Glycosyl hydrolase family 36 C-terminal domain	611	690	2.2e-09	T	IPR031705	Glycosyl hydrolase family 36, C-terminal		KEGG: 00052+3.2.1.22|KEGG: 00561+3.2.1.22|KEGG: 00600+3.2.1.22|KEGG: 00603+3.2.1.22|MetaCyc: PWY-6527
Vas1_1937_GH36	705	ProSitePatterns	PS00512	Alpha-galactosidase signature.	324	339	-	T	IPR000111	Glycoside hydrolase family 27/36, conserved site	GO:0004553|GO:0005975	KEGG: 00052+3.2.1.22|KEGG: 00561+3.2.1.22|KEGG: 00600+3.2.1.22|KEGG: 00603+3.2.1.22|MetaCyc: PWY-6527
Vas1_1937_GH36	705	SUPERFAMILY	SSF51445		290	622	6.96e-106	T	IPR017853	Glycoside hydrolase superfamily
Vas1_1937_GH36	705	PANTHER	PTHR43053:SF6		12	661	9.7e-128	T
Vas1_1937_GH36	705	PANTHER	PTHR43053		12	661	9.7e-128	T
Vas1_1937_GH36	705	Pfam	PF16875	Glycosyl hydrolase family 36 N-terminal domain	24	244	3.6e-43	T	IPR031704	Glycosyl hydrolase family 36, N-terminal		KEGG: 00052+3.2.1.22|KEGG: 00561+3.2.1.22|KEGG: 00600+3.2.1.22|KEGG: 00603+3.2.1.22|MetaCyc: PWY-6527
Vas1_1937_GH36	705	CDD	cd14791	GH36	293	585	6.05288e-126	T
Vas1_1937_GH36	705	PIRSF	PIRSF005536		1	702	2.1e-229	T	IPR002252	Glycoside hydrolase family 36	GO:0004557|GO:0005975	KEGG: 00052+3.2.1.22|KEGG: 00561+3.2.1.22|KEGG: 00600+3.2.1.22|KEGG: 00603+3.2.1.22|MetaCyc: PWY-6527
Vas1_1937_GH36	705	PRINTS	PR00743	Glycosyl hydrolase family 36 signature	323	338	1.6e-56	T	IPR002252	Glycoside hydrolase family 36	GO:0004557|GO:0005975	KEGG: 00052+3.2.1.22|KEGG: 00561+3.2.1.22|KEGG: 00600+3.2.1.22|KEGG: 00603+3.2.1.22|MetaCyc: PWY-6527
Vas1_1937_GH36	705	PRINTS	PR00743	Glycosyl hydrolase family 36 signature	373	395	1.6e-56	T	IPR002252	Glycoside hydrolase family 36	GO:0004557|GO:0005975	KEGG: 00052+3.2.1.22|KEGG: 00561+3.2.1.22|KEGG: 00600+3.2.1.22|KEGG: 00603+3.2.1.22|MetaCyc: PWY-6527
Vas1_1937_GH36	705	PRINTS	PR00743	Glycosyl hydrolase family 36 signature	206	221	1.6e-56	T	IPR002252	Glycoside hydrolase family 36	GO:0004557|GO:0005975	KEGG: 00052+3.2.1.22|KEGG: 00561+3.2.1.22|KEGG: 00600+3.2.1.22|KEGG: 00603+3.2.1.22|MetaCyc: PWY-6527
Vas1_1937_GH36	705	PRINTS	PR00743	Glycosyl hydrolase family 36 signature	295	309	1.6e-56	T	IPR002252	Glycoside hydrolase family 36	GO:0004557|GO:0005975	KEGG: 00052+3.2.1.22|KEGG: 00561+3.2.1.22|KEGG: 00600+3.2.1.22|KEGG: 00603+3.2.1.22|MetaCyc: PWY-6527
Vas1_1937_GH36	705	PRINTS	PR00743	Glycosyl hydrolase family 36 signature	257	277	1.6e-56	T	IPR002252	Glycoside hydrolase family 36	GO:0004557|GO:0005975	KEGG: 00052+3.2.1.22|KEGG: 00561+3.2.1.22|KEGG: 00600+3.2.1.22|KEGG: 00603+3.2.1.22|MetaCyc: PWY-6527
Vas1_1937_GH36	705	PRINTS	PR00743	Glycosyl hydrolase family 36 signature	479	495	1.6e-56	T	IPR002252	Glycoside hydrolase family 36	GO:0004557|GO:0005975	KEGG: 00052+3.2.1.22|KEGG: 00561+3.2.1.22|KEGG: 00600+3.2.1.22|KEGG: 00603+3.2.1.22|MetaCyc: PWY-6527
Vas1_1937_GH36	705	PRINTS	PR00743	Glycosyl hydrolase family 36 signature	504	520	1.6e-56	T	IPR002252	Glycoside hydrolase family 36	GO:0004557|GO:0005975	KEGG: 00052+3.2.1.22|KEGG: 00561+3.2.1.22|KEGG: 00600+3.2.1.22|KEGG: 00603+3.2.1.22|MetaCyc: PWY-6527
Vas1_1937_GH36	705	PRINTS	PR00743	Glycosyl hydrolase family 36 signature	431	446	1.6e-56	T	IPR002252	Glycoside hydrolase family 36	GO:0004557|GO:0005975	KEGG: 00052+3.2.1.22|KEGG: 00561+3.2.1.22|KEGG: 00600+3.2.1.22|KEGG: 00603+3.2.1.22|MetaCyc: PWY-6527
Vas1_1937_GH36	705	Pfam	PF02065	Melibiase	254	593	8.4e-122	T	IPR002252	Glycoside hydrolase family 36	GO:0004557|GO:0005975	KEGG: 00052+3.2.1.22|KEGG: 00561+3.2.1.22|KEGG: 00600+3.2.1.22|KEGG: 00603+3.2.1.22|MetaCyc: PWY-6527
Vas1_1937_GH36	705	Gene3D	G3DSA:3.20.20.70		291	574	9.8e-44	T	IPR013785	Aldolase-type TIM barrel	GO:0003824
Vas1_1940_GH2	1021	Gene3D	G3DSA:2.60.40.320		633	725	1.8e-24	T	IPR013812	Glycoside hydrolase, family 2/20, immunoglobulin-like beta-sandwich domain	GO:0004553|GO:0005975
Vas1_1940_GH2	1021	Gene3D	G3DSA:3.20.20.80		329	616	4.6e-112	T	IPR013781	Glycoside hydrolase, catalytic domain	GO:0005975
Vas1_1940_GH2	1021	Gene3D	G3DSA:2.60.40.320		204	328	1.6e-31	T	IPR013812	Glycoside hydrolase, family 2/20, immunoglobulin-like beta-sandwich domain	GO:0004553|GO:0005975
Vas1_1940_GH2	1021	Pfam	PF02836	Glycosyl hydrolases family 2, TIM barrel domain	330	621	8.6e-113	T	IPR006103	Glycoside hydrolase family 2, catalytic domain	GO:0004553|GO:0005975	KEGG: 00052+3.2.1.23|KEGG: 00511+3.2.1.23|KEGG: 00531+3.2.1.23|KEGG: 00600+3.2.1.23|KEGG: 00604+3.2.1.23|MetaCyc: PWY-6807|Reactome: R-HSA-6798695
Vas1_1940_GH2	1021	Gene3D	G3DSA:2.70.98.10		738	1020	4.6e-89	T	IPR014718	Glycoside hydrolase-type carbohydrate-binding	GO:0003824|GO:0005975|GO:0030246
Vas1_1940_GH2	1021	SUPERFAMILY	SSF49303		218	328	4.6e-23	T	IPR006102	Glycoside hydrolase, family 2, immunoglobulin-like beta-sandwich	GO:0004553|GO:0005975
Vas1_1940_GH2	1021	PRINTS	PR00132	Glycosyl hydrolase family 2 signature	142	157	8.2e-38	T	IPR006101	Glycoside hydrolase, family 2	GO:0004553|GO:0005975	KEGG: 00052+3.2.1.23|KEGG: 00511+3.2.1.23|KEGG: 00531+3.2.1.23|KEGG: 00600+3.2.1.23|KEGG: 00604+3.2.1.23|MetaCyc: PWY-6807|Reactome: R-HSA-2024096|Reactome: R-HSA-2160916|Reactome: R-HSA-6798695
Vas1_1940_GH2	1021	PRINTS	PR00132	Glycosyl hydrolase family 2 signature	339	353	8.2e-38	T	IPR006101	Glycoside hydrolase, family 2	GO:0004553|GO:0005975	KEGG: 00052+3.2.1.23|KEGG: 00511+3.2.1.23|KEGG: 00531+3.2.1.23|KEGG: 00600+3.2.1.23|KEGG: 00604+3.2.1.23|MetaCyc: PWY-6807|Reactome: R-HSA-2024096|Reactome: R-HSA-2160916|Reactome: R-HSA-6798695
Vas1_1940_GH2	1021	PRINTS	PR00132	Glycosyl hydrolase family 2 signature	370	388	8.2e-38	T	IPR006101	Glycoside hydrolase, family 2	GO:0004553|GO:0005975	KEGG: 00052+3.2.1.23|KEGG: 00511+3.2.1.23|KEGG: 00531+3.2.1.23|KEGG: 00600+3.2.1.23|KEGG: 00604+3.2.1.23|MetaCyc: PWY-6807|Reactome: R-HSA-2024096|Reactome: R-HSA-2160916|Reactome: R-HSA-6798695
Vas1_1940_GH2	1021	PRINTS	PR00132	Glycosyl hydrolase family 2 signature	442	457	8.2e-38	T	IPR006101	Glycoside hydrolase, family 2	GO:0004553|GO:0005975	KEGG: 00052+3.2.1.23|KEGG: 00511+3.2.1.23|KEGG: 00531+3.2.1.23|KEGG: 00600+3.2.1.23|KEGG: 00604+3.2.1.23|MetaCyc: PWY-6807|Reactome: R-HSA-2024096|Reactome: R-HSA-2160916|Reactome: R-HSA-6798695
Vas1_1940_GH2	1021	PRINTS	PR00132	Glycosyl hydrolase family 2 signature	526	541	8.2e-38	T	IPR006101	Glycoside hydrolase, family 2	GO:0004553|GO:0005975	KEGG: 00052+3.2.1.23|KEGG: 00511+3.2.1.23|KEGG: 00531+3.2.1.23|KEGG: 00600+3.2.1.23|KEGG: 00604+3.2.1.23|MetaCyc: PWY-6807|Reactome: R-HSA-2024096|Reactome: R-HSA-2160916|Reactome: R-HSA-6798695
Vas1_1940_GH2	1021	Pfam	PF02837	Glycosyl hydrolases family 2, sugar binding domain	47	214	2.1e-55	T	IPR006104	Glycosyl hydrolases family 2, sugar binding domain	GO:0004553|GO:0005975	KEGG: 00052+3.2.1.23|KEGG: 00511+3.2.1.23|KEGG: 00531+3.2.1.23|KEGG: 00600+3.2.1.23|KEGG: 00604+3.2.1.23|MetaCyc: PWY-6807
Vas1_1940_GH2	1021	Pfam	PF16353	Domain of unknown function(DUF4981)	636	722	3e-17	T	IPR032312	Beta-galactosidase, domain 4		KEGG: 00052+3.2.1.23|KEGG: 00511+3.2.1.23|KEGG: 00531+3.2.1.23|KEGG: 00600+3.2.1.23|KEGG: 00604+3.2.1.23|MetaCyc: PWY-6807
Vas1_1940_GH2	1021	SUPERFAMILY	SSF74650		738	1020	1.08e-90	T	IPR011013	Galactose mutarotase-like domain	GO:0003824|GO:0005975|GO:0030246
Vas1_1940_GH2	1021	SUPERFAMILY	SSF49303		632	724	1.73e-23	T	IPR006102	Glycoside hydrolase, family 2, immunoglobulin-like beta-sandwich	GO:0004553|GO:0005975
Vas1_1940_GH2	1021	SMART	SM01038		749	1021	4.2e-102	T	IPR004199	Beta galactosidase small chain/ domain 5	GO:0004565|GO:0005975|GO:0009341	KEGG: 00052+3.2.1.23|KEGG: 00511+3.2.1.23|KEGG: 00531+3.2.1.23|KEGG: 00600+3.2.1.23|KEGG: 00604+3.2.1.23|MetaCyc: PWY-6807
Vas1_1940_GH2	1021	PANTHER	PTHR10066:SF75		3	1020	0	T	IPR023933	Glycoside hydrolase, family 2, beta-galactosidase	GO:0016798	KEGG: 00052+3.2.1.23|KEGG: 00511+3.2.1.23|KEGG: 00531+3.2.1.23|KEGG: 00600+3.2.1.23|KEGG: 00604+3.2.1.23|MetaCyc: PWY-6807
Vas1_1940_GH2	1021	SUPERFAMILY	SSF49785		10	214	4.82e-65	T	IPR008979	Galactose-binding domain-like
Vas1_1940_GH2	1021	Gene3D	G3DSA:2.60.120.260		4	203	9.6e-81	T	IPR008979	Galactose-binding domain-like
Vas1_1940_GH2	1021	PANTHER	PTHR10066		3	1020	0	T
Vas1_1940_GH2	1021	Hamap	MF_01687	Beta-galactosidase [lacZ].	1	1021	16.641	T	IPR023933	Glycoside hydrolase, family 2, beta-galactosidase	GO:0016798	KEGG: 00052+3.2.1.23|KEGG: 00511+3.2.1.23|KEGG: 00531+3.2.1.23|KEGG: 00600+3.2.1.23|KEGG: 00604+3.2.1.23|MetaCyc: PWY-6807
Vas1_1940_GH2	1021	ProSitePatterns	PS00608	Glycosyl hydrolases family 2 acid/base catalyst.	442	456	-	T	IPR023232	Glycoside hydrolase, family 2, active site		KEGG: 00052+3.2.1.23|KEGG: 00511+3.2.1.23|KEGG: 00531+3.2.1.23|KEGG: 00600+3.2.1.23|KEGG: 00604+3.2.1.23|MetaCyc: PWY-6807|Reactome: R-HSA-2024096|Reactome: R-HSA-2160916|Reactome: R-HSA-6798695
Vas1_1940_GH2	1021	SUPERFAMILY	SSF51445		329	616	1.82e-100	T	IPR017853	Glycoside hydrolase superfamily
Vas1_1940_GH2	1021	Pfam	PF00703	Glycosyl hydrolases family 2	218	328	1.5e-15	T	IPR006102	Glycoside hydrolase, family 2, immunoglobulin-like beta-sandwich	GO:0004553|GO:0005975
Vas1_1940_GH2	1021	Pfam	PF02929	Beta galactosidase small chain	754	1020	2e-66	T	IPR004199	Beta galactosidase small chain/ domain 5	GO:0004565|GO:0005975|GO:0009341	KEGG: 00052+3.2.1.23|KEGG: 00511+3.2.1.23|KEGG: 00531+3.2.1.23|KEGG: 00600+3.2.1.23|KEGG: 00604+3.2.1.23|MetaCyc: PWY-6807
Vas1_201_GH116	1024	Coils	Coil		710	730	-	T
Vas1_201_GH116	1024	PANTHER	PTHR12654		143	932	9e-79	T
Vas1_201_GH116	1024	Pfam	PF04685	Glycosyl-hydrolase family 116, catalytic region	509	932	4.5e-59	T	IPR006775	Glycosyl-hydrolase family 116, catalytic region	GO:0004553	KEGG: 00511+3.2.1.45|KEGG: 00600+3.2.1.45|Reactome: R-HSA-1660662
Vas1_201_GH116	1024	Pfam	PF12215	beta-glucosidase 2, glycosyl-hydrolase family 116 N-term	148	450	2.7e-18	T	IPR024462	Glycosyl-hydrolase family 116, N-terminal		KEGG: 00511+3.2.1.45|KEGG: 00600+3.2.1.45|Reactome: R-HSA-1660662
Vas1_201_GH116	1024	Gene3D	G3DSA:1.50.10.10		619	770	5.1e-07	T	IPR012341	Six-hairpin glycosidase	GO:0003824
Vas1_201_GH116	1024	SUPERFAMILY	SSF48208		455	734	4.02e-30	T	IPR008928	Six-hairpin glycosidase-like	GO:0003824
Vas1_201_GH116	1024	SUPERFAMILY	SSF48208		812	930	4.02e-30	T	IPR008928	Six-hairpin glycosidase-like	GO:0003824
Vas1_203_GH94	803	Gene3D	G3DSA:2.70.98.40		2	335	3.1e-60	T	IPR005196	Glycoside hydrolase, family 65, N-terminal	GO:0003824|GO:0005975
Vas1_203_GH94	803	SUPERFAMILY	SSF48208		283	803	3.25e-104	T	IPR008928	Six-hairpin glycosidase-like	GO:0003824
Vas1_203_GH94	803	Pfam	PF06165	Glycosyltransferase family 36	22	273	3e-43	T	IPR010383	Glycosyl hydrolase 94
Vas1_203_GH94	803	Pfam	PF17167	Glycosyl hydrolase 36 superfamily, catalytic domain	306	730	7.1e-134	T	IPR033432	Glycosyl hydrolase 36, catalytic domain
Vas1_203_GH94	803	SUPERFAMILY	SSF74650		2	259	1.6e-33	T	IPR011013	Galactose mutarotase-like domain	GO:0003824|GO:0005975|GO:0030246
Vas1_203_GH94	803	PANTHER	PTHR37469		204	802	6.3e-178	T
Vas1_203_GH94	803	Gene3D	G3DSA:2.60.420.10		722	783	1.6e-10	T
Vas1_203_GH94	803	Gene3D	G3DSA:1.50.10.10		373	580	3.1e-05	T	IPR012341	Six-hairpin glycosidase	GO:0003824
Vas1_2045_GH73	316	SMART	SM00047		155	314	8.7e-50	T	IPR002901	Mannosyl-glycoprotein endo-beta-N-acetylglucosamidase-like domain	GO:0004040
Vas1_2045_GH73	316	PANTHER	PTHR33308:SF5		167	307	8.3e-15	T
Vas1_2045_GH73	316	Pfam	PF10135	Rod binding protein	53	102	2.6e-15	T	IPR019301	Flagellar protein FlgJ, N-terminal
Vas1_2045_GH73	316	PANTHER	PTHR33308		167	307	8.3e-15	T
Vas1_2045_GH73	316	PRINTS	PR01002	Flagellar protein FlgJ signature	252	273	2.1e-26	T
Vas1_2045_GH73	316	PRINTS	PR01002	Flagellar protein FlgJ signature	31	54	2.1e-26	T
Vas1_2045_GH73	316	PRINTS	PR01002	Flagellar protein FlgJ signature	208	229	2.1e-26	T
Vas1_2045_GH73	316	PRINTS	PR01002	Flagellar protein FlgJ signature	296	314	2.1e-26	T
Vas1_2045_GH73	316	PRINTS	PR01002	Flagellar protein FlgJ signature	230	251	2.1e-26	T
Vas1_2045_GH73	316	PRINTS	PR01002	Flagellar protein FlgJ signature	79	101	2.1e-26	T
Vas1_2045_GH73	316	TIGRFAM	TIGR02541	flagell_FlgJ: flagellar rod assembly protein/muramidase FlgJ	10	313	9.3e-103	T	IPR013377	Peptidoglycan hydrolase FlgJ	GO:0016798|GO:0044780
Vas1_2045_GH73	316	Pfam	PF01832	Mannosyl-glycoprotein endo-beta-N-acetylglucosaminidase	176	313	1.6e-20	T	IPR002901	Mannosyl-glycoprotein endo-beta-N-acetylglucosamidase-like domain	GO:0004040
Vas1_205_GH1	451	PRINTS	PR00131	Glycosyl hydrolase family 1 signature	391	408	2.3e-23	T	IPR001360	Glycoside hydrolase family 1	GO:0004553|GO:0005975
Vas1_205_GH1	451	PRINTS	PR00131	Glycosyl hydrolase family 1 signature	350	358	2.3e-23	T	IPR001360	Glycoside hydrolase family 1	GO:0004553|GO:0005975
Vas1_205_GH1	451	PRINTS	PR00131	Glycosyl hydrolase family 1 signature	289	303	2.3e-23	T	IPR001360	Glycoside hydrolase family 1	GO:0004553|GO:0005975
Vas1_205_GH1	451	PRINTS	PR00131	Glycosyl hydrolase family 1 signature	415	427	2.3e-23	T	IPR001360	Glycoside hydrolase family 1	GO:0004553|GO:0005975
Vas1_205_GH1	451	PRINTS	PR00131	Glycosyl hydrolase family 1 signature	370	381	2.3e-23	T	IPR001360	Glycoside hydrolase family 1	GO:0004553|GO:0005975
Vas1_205_GH1	451	TIGRFAM	TIGR03356	BGL: beta-galactosidase	16	437	3.3e-182	T	IPR017736	Glycoside hydrolase, family 1, beta-glucosidase	GO:0008422|GO:0030245	KEGG: 00460+3.2.1.21|KEGG: 00500+3.2.1.21|KEGG: 00940+3.2.1.21|MetaCyc: PWY-3121|MetaCyc: PWY-5176|MetaCyc: PWY-6002|MetaCyc: PWY-6788|MetaCyc: PWY-7091|MetaCyc: PWY-7092
Vas1_205_GH1	451	ProSitePatterns	PS00572	Glycosyl hydrolases family 1 active site.	350	358	-	T	IPR018120	Glycoside hydrolase family 1, active site
Vas1_205_GH1	451	ProSitePatterns	PS00653	Glycosyl hydrolases family 1 N-terminal signature.	17	31	-	T	IPR033132	Glycosyl hydrolases family 1, N-terminal conserved site
Vas1_205_GH1	451	Gene3D	G3DSA:3.20.20.80		15	446	2.2e-156	T	IPR013781	Glycoside hydrolase, catalytic domain	GO:0005975
Vas1_205_GH1	451	SUPERFAMILY	SSF51445		16	441	4.83e-157	T	IPR017853	Glycoside hydrolase superfamily
Vas1_205_GH1	451	PANTHER	PTHR10353		15	447	1.3e-140	T	IPR001360	Glycoside hydrolase family 1	GO:0004553|GO:0005975
Vas1_205_GH1	451	PANTHER	PTHR10353:SF115		15	447	1.3e-140	T
Vas1_205_GH1	451	Pfam	PF00232	Glycosyl hydrolase family 1	16	441	7.1e-149	T	IPR001360	Glycoside hydrolase family 1	GO:0004553|GO:0005975
Vas1_2069_GH20	883	Gene3D	G3DSA:3.20.20.80		330	832	8.6e-157	T	IPR013781	Glycoside hydrolase, catalytic domain	GO:0005975
Vas1_2069_GH20	883	PANTHER	PTHR22600:SF25		21	877	0	T
Vas1_2069_GH20	883	Pfam	PF02838	Glycosyl hydrolase family 20, domain 2	211	329	1.9e-13	T	IPR015882	Beta-hexosaminidase, bacteial type, N-terminal		KEGG: 00511+3.2.1.52|KEGG: 00513+3.2.1.52|KEGG: 00520+3.2.1.52|KEGG: 00531+3.2.1.52|KEGG: 00603+3.2.1.52|KEGG: 00604+3.2.1.52|MetaCyc: PWY-6902|MetaCyc: PWY-7822
Vas1_2069_GH20	883	SUPERFAMILY	SSF51445		332	773	1.26e-141	T	IPR017853	Glycoside hydrolase superfamily
Vas1_2069_GH20	883	ProSiteProfiles	PS51257	Prokaryotic membrane lipoprotein lipid attachment site profile.	1	18	5	T
Vas1_2069_GH20	883	PRINTS	PR00738	Glycosyl hydrolase family 20 signature	326	343	1.3e-47	T	IPR025705	Beta-hexosaminidase	GO:0004563|GO:0005975	KEGG: 00511+3.2.1.52|KEGG: 00513+3.2.1.52|KEGG: 00520+3.2.1.52|KEGG: 00531+3.2.1.52|KEGG: 00603+3.2.1.52|KEGG: 00604+3.2.1.52|MetaCyc: PWY-6902|MetaCyc: PWY-7822|Reactome: R-HSA-1660662|Reactome: R-HSA-2022857|Reactome: R-HSA-2024101|Reactome: R-HSA-2160916
Vas1_2069_GH20	883	PRINTS	PR00738	Glycosyl hydrolase family 20 signature	355	376	1.3e-47	T	IPR025705	Beta-hexosaminidase	GO:0004563|GO:0005975	KEGG: 00511+3.2.1.52|KEGG: 00513+3.2.1.52|KEGG: 00520+3.2.1.52|KEGG: 00531+3.2.1.52|KEGG: 00603+3.2.1.52|KEGG: 00604+3.2.1.52|MetaCyc: PWY-6902|MetaCyc: PWY-7822|Reactome: R-HSA-1660662|Reactome: R-HSA-2022857|Reactome: R-HSA-2024101|Reactome: R-HSA-2160916
Vas1_2069_GH20	883	PRINTS	PR00738	Glycosyl hydrolase family 20 signature	728	744	1.3e-47	T	IPR025705	Beta-hexosaminidase	GO:0004563|GO:0005975	KEGG: 00511+3.2.1.52|KEGG: 00513+3.2.1.52|KEGG: 00520+3.2.1.52|KEGG: 00531+3.2.1.52|KEGG: 00603+3.2.1.52|KEGG: 00604+3.2.1.52|MetaCyc: PWY-6902|MetaCyc: PWY-7822|Reactome: R-HSA-1660662|Reactome: R-HSA-2022857|Reactome: R-HSA-2024101|Reactome: R-HSA-2160916
Vas1_2069_GH20	883	PRINTS	PR00738	Glycosyl hydrolase family 20 signature	746	763	1.3e-47	T	IPR025705	Beta-hexosaminidase	GO:0004563|GO:0005975	KEGG: 00511+3.2.1.52|KEGG: 00513+3.2.1.52|KEGG: 00520+3.2.1.52|KEGG: 00531+3.2.1.52|KEGG: 00603+3.2.1.52|KEGG: 00604+3.2.1.52|MetaCyc: PWY-6902|MetaCyc: PWY-7822|Reactome: R-HSA-1660662|Reactome: R-HSA-2022857|Reactome: R-HSA-2024101|Reactome: R-HSA-2160916
Vas1_2069_GH20	883	PRINTS	PR00738	Glycosyl hydrolase family 20 signature	292	312	1.3e-47	T	IPR025705	Beta-hexosaminidase	GO:0004563|GO:0005975	KEGG: 00511+3.2.1.52|KEGG: 00513+3.2.1.52|KEGG: 00520+3.2.1.52|KEGG: 00531+3.2.1.52|KEGG: 00603+3.2.1.52|KEGG: 00604+3.2.1.52|MetaCyc: PWY-6902|MetaCyc: PWY-7822|Reactome: R-HSA-1660662|Reactome: R-HSA-2022857|Reactome: R-HSA-2024101|Reactome: R-HSA-2160916
Vas1_2069_GH20	883	PRINTS	PR00738	Glycosyl hydrolase family 20 signature	526	539	1.3e-47	T	IPR025705	Beta-hexosaminidase	GO:0004563|GO:0005975	KEGG: 00511+3.2.1.52|KEGG: 00513+3.2.1.52|KEGG: 00520+3.2.1.52|KEGG: 00531+3.2.1.52|KEGG: 00603+3.2.1.52|KEGG: 00604+3.2.1.52|MetaCyc: PWY-6902|MetaCyc: PWY-7822|Reactome: R-HSA-1660662|Reactome: R-HSA-2022857|Reactome: R-HSA-2024101|Reactome: R-HSA-2160916
Vas1_2069_GH20	883	PRINTS	PR00738	Glycosyl hydrolase family 20 signature	432	449	1.3e-47	T	IPR025705	Beta-hexosaminidase	GO:0004563|GO:0005975	KEGG: 00511+3.2.1.52|KEGG: 00513+3.2.1.52|KEGG: 00520+3.2.1.52|KEGG: 00531+3.2.1.52|KEGG: 00603+3.2.1.52|KEGG: 00604+3.2.1.52|MetaCyc: PWY-6902|MetaCyc: PWY-7822|Reactome: R-HSA-1660662|Reactome: R-HSA-2022857|Reactome: R-HSA-2024101|Reactome: R-HSA-2160916
Vas1_2069_GH20	883	PRINTS	PR00738	Glycosyl hydrolase family 20 signature	499	517	1.3e-47	T	IPR025705	Beta-hexosaminidase	GO:0004563|GO:0005975	KEGG: 00511+3.2.1.52|KEGG: 00513+3.2.1.52|KEGG: 00520+3.2.1.52|KEGG: 00531+3.2.1.52|KEGG: 00603+3.2.1.52|KEGG: 00604+3.2.1.52|MetaCyc: PWY-6902|MetaCyc: PWY-7822|Reactome: R-HSA-1660662|Reactome: R-HSA-2022857|Reactome: R-HSA-2024101|Reactome: R-HSA-2160916
Vas1_2069_GH20	883	ProSitePatterns	PS00018	EF-hand calcium-binding domain.	711	723	-	T	IPR018247	EF-Hand 1, calcium-binding site
Vas1_2069_GH20	883	Gene3D	G3DSA:2.60.40.320		833	881	1.7e-25	T	IPR013812	Glycoside hydrolase, family 2/20, immunoglobulin-like beta-sandwich domain	GO:0004553|GO:0005975
Vas1_2069_GH20	883	Pfam	PF03173	Putative carbohydrate binding domain	35	193	1.7e-62	T	IPR004866	Chitobiase/beta-hexosaminidases, N-terminal domain		KEGG: 00511+3.2.1.52|KEGG: 00513+3.2.1.52|KEGG: 00520+3.2.1.52|KEGG: 00531+3.2.1.52|KEGG: 00603+3.2.1.52|KEGG: 00604+3.2.1.52|MetaCyc: PWY-6902|MetaCyc: PWY-7822
Vas1_2069_GH20	883	CDD	cd06569	GH20_Sm-chitobiase-like	328	800	0	T
Vas1_2069_GH20	883	SignalP_GRAM_POSITIVE	SignalP-TM		1	24	-	T
Vas1_2069_GH20	883	Pfam	PF00728	Glycosyl hydrolase family 20, catalytic domain	332	764	2.4e-108	T	IPR015883	Glycoside hydrolase family 20, catalytic domain	GO:0004553|GO:0005975	KEGG: 00511+3.2.1.52|KEGG: 00513+3.2.1.52|KEGG: 00520+3.2.1.52|KEGG: 00531+3.2.1.52|KEGG: 00603+3.2.1.52|KEGG: 00604+3.2.1.52|MetaCyc: PWY-6902|MetaCyc: PWY-7822
Vas1_2069_GH20	883	Pfam	PF03174	Chitobiase/beta-hexosaminidase C-terminal domain	804	879	3.1e-28	T	IPR004867	Chitobiase C-terminal domain		KEGG: 00511+3.2.1.52|KEGG: 00513+3.2.1.52|KEGG: 00520+3.2.1.52|KEGG: 00531+3.2.1.52|KEGG: 00603+3.2.1.52|KEGG: 00604+3.2.1.52|MetaCyc: PWY-6902|MetaCyc: PWY-7822
Vas1_2069_GH20	883	CDD	cd02847	E_set_Chitobiase_C	819	882	6.05959e-23	T	IPR004867	Chitobiase C-terminal domain		KEGG: 00511+3.2.1.52|KEGG: 00513+3.2.1.52|KEGG: 00520+3.2.1.52|KEGG: 00531+3.2.1.52|KEGG: 00603+3.2.1.52|KEGG: 00604+3.2.1.52|MetaCyc: PWY-6902|MetaCyc: PWY-7822
Vas1_2069_GH20	883	SUPERFAMILY	SSF49384		26	198	1.99e-65	T	IPR008965	Carbohydrate-binding domain	GO:0030246
Vas1_2069_GH20	883	Coils	Coil		454	474	-	T
Vas1_2069_GH20	883	SignalP_EUK	SignalP-noTM		1	21	-	T
Vas1_2069_GH20	883	PANTHER	PTHR22600		21	877	0	T
Vas1_2069_GH20	883	SignalP_GRAM_NEGATIVE	SignalP-noTM		1	24	-	T
Vas1_2069_GH20	883	SUPERFAMILY	SSF81296		780	882	2.52e-35	T	IPR014756	Immunoglobulin E-set
Vas1_2069_GH20	883	SMART	SM01081		34	195	1.2e-89	T	IPR004866	Chitobiase/beta-hexosaminidases, N-terminal domain		KEGG: 00511+3.2.1.52|KEGG: 00513+3.2.1.52|KEGG: 00520+3.2.1.52|KEGG: 00531+3.2.1.52|KEGG: 00603+3.2.1.52|KEGG: 00604+3.2.1.52|MetaCyc: PWY-6902|MetaCyc: PWY-7822
Vas1_2069_GH20	883	Gene3D	G3DSA:3.30.379.10		206	329	2.6e-23	T	IPR029018	Chitobiase/beta-hexosaminidase domain 2-like		Reactome: R-HSA-1660662|Reactome: R-HSA-2022857|Reactome: R-HSA-2024101|Reactome: R-HSA-2160916
Vas1_2069_GH20	883	Gene3D	G3DSA:2.60.40.290		26	167	3.9e-59	T	IPR012291	Cellulose-binding family II/chitobiase, carbohydrate-binding domain	GO:0004553|GO:0030247
Vas1_2069_GH20	883	SUPERFAMILY	SSF55545		207	331	1.57e-23	T	IPR029018	Chitobiase/beta-hexosaminidase domain 2-like		Reactome: R-HSA-1660662|Reactome: R-HSA-2022857|Reactome: R-HSA-2024101|Reactome: R-HSA-2160916
Vas1_2086_GH23	525	Pfam	PF01464	Transglycosylase SLT domain	124	225	2.2e-22	T	IPR008258	Transglycosylase SLT domain 1
Vas1_2086_GH23	525	SUPERFAMILY	SSF54106		341	385	1.31e-10	T	IPR018392	LysM domain
Vas1_2086_GH23	525	SignalP_GRAM_POSITIVE	SignalP-TM		1	26	-	T
Vas1_2086_GH23	525	Gene3D	G3DSA:3.10.350.10		341	386	2.6e-16	T	IPR018392	LysM domain
Vas1_2086_GH23	525	SUPERFAMILY	SSF54106		416	460	1.57e-10	T	IPR018392	LysM domain
Vas1_2086_GH23	525	Gene3D	G3DSA:3.10.350.10		417	461	4e-16	T	IPR018392	LysM domain
Vas1_2086_GH23	525	Gene3D	G3DSA:3.10.350.10		471	517	9e-14	T	IPR018392	LysM domain
Vas1_2086_GH23	525	CDD	cd00118	LysM	341	384	7.43716e-11	T	IPR018392	LysM domain
Vas1_2086_GH23	525	CDD	cd00254	LT_GEWL	126	250	2.419e-25	T
Vas1_2086_GH23	525	PANTHER	PTHR21666:SF253		5	518	3.8e-169	T
Vas1_2086_GH23	525	Gene3D	G3DSA:1.10.530.10		107	269	2.2e-44	T
Vas1_2086_GH23	525	CDD	cd00118	LysM	472	516	1.65961e-09	T	IPR018392	LysM domain
Vas1_2086_GH23	525	SUPERFAMILY	SSF54106		472	517	5.1e-09	T	IPR018392	LysM domain
Vas1_2086_GH23	525	SMART	SM00257		416	460	2.7e-10	T	IPR018392	LysM domain
Vas1_2086_GH23	525	SMART	SM00257		473	517	9.2e-08	T	IPR018392	LysM domain
Vas1_2086_GH23	525	SMART	SM00257		342	385	1e-12	T	IPR018392	LysM domain
Vas1_2086_GH23	525	Pfam	PF01476	LysM domain	417	459	6.5e-12	T	IPR018392	LysM domain
Vas1_2086_GH23	525	Pfam	PF01476	LysM domain	343	385	2.7e-11	T	IPR018392	LysM domain
Vas1_2086_GH23	525	Pfam	PF01476	LysM domain	474	515	1.4e-09	T	IPR018392	LysM domain
Vas1_2086_GH23	525	SignalP_EUK	SignalP-noTM		1	18	-	T
Vas1_2086_GH23	525	PANTHER	PTHR21666		5	518	3.8e-169	T
Vas1_2086_GH23	525	MobiDBLite	mobidb-lite	consensus disorder prediction	20	64	-	T
Vas1_2086_GH23	525	ProSitePatterns	PS00922	Prokaryotic transglycosylases signature.	132	160	-	T	IPR000189	Prokaryotic transglycosylase, active site	GO:0000270|GO:0008933|GO:0016020
Vas1_2086_GH23	525	CDD	cd00118	LysM	417	459	1.92788e-12	T	IPR018392	LysM domain
Vas1_2086_GH23	525	SUPERFAMILY	SSF53955		111	262	3.49e-39	T	IPR023346	Lysozyme-like domain
Vas1_2086_GH23	525	ProSiteProfiles	PS51257	Prokaryotic membrane lipoprotein lipid attachment site profile.	1	16	5	T
Vas1_2308_GH9	571	Gene3D	G3DSA:1.50.10.10		95	560	2e-67	T	IPR012341	Six-hairpin glycosidase	GO:0003824
Vas1_2308_GH9	571	SUPERFAMILY	SSF48208		87	561	5.1e-82	T	IPR008928	Six-hairpin glycosidase-like	GO:0003824
Vas1_2308_GH9	571	Gene3D	G3DSA:2.60.40.10		4	90	3.9e-15	T	IPR013783	Immunoglobulin-like fold
Vas1_2308_GH9	571	Pfam	PF00759	Glycosyl hydrolase family 9	96	500	8.4e-25	T	IPR001701	Glycoside hydrolase family 9	GO:0004553|GO:0005975	KEGG: 00500+3.2.1.4|MetaCyc: PWY-6788
Vas1_2308_GH9	571	Pfam	PF02927	Cellulase N-terminal ig-like domain	4	83	3.6e-10	T	IPR004197	Cellulase, Ig-like domain	GO:0005975|GO:0008810
Vas1_2308_GH9	571	PANTHER	PTHR22298:SF62		99	509	3.3e-20	T
Vas1_2308_GH9	571	CDD	cd02850	E_set_Cellulase_N	2	89	5.97524e-17	T	IPR004197	Cellulase, Ig-like domain	GO:0005975|GO:0008810
Vas1_2308_GH9	571	SUPERFAMILY	SSF81296		2	89	1.26e-12	T	IPR014756	Immunoglobulin E-set
Vas1_2308_GH9	571	PANTHER	PTHR22298		99	509	3.3e-20	T
Vas1_2310_GH20	640	SUPERFAMILY	SSF51445		260	620	3.44e-124	T	IPR017853	Glycoside hydrolase superfamily
Vas1_2310_GH20	640	Pfam	PF00728	Glycosyl hydrolase family 20, catalytic domain	260	607	1.8e-114	T	IPR015883	Glycoside hydrolase family 20, catalytic domain	GO:0004553|GO:0005975	KEGG: 00511+3.2.1.52|KEGG: 00513+3.2.1.52|KEGG: 00520+3.2.1.52|KEGG: 00531+3.2.1.52|KEGG: 00603+3.2.1.52|KEGG: 00604+3.2.1.52|MetaCyc: PWY-6902|MetaCyc: PWY-7822
Vas1_2310_GH20	640	Pfam	PF02838	Glycosyl hydrolase family 20, domain 2	135	257	2.5e-13	T	IPR015882	Beta-hexosaminidase, bacteial type, N-terminal		KEGG: 00511+3.2.1.52|KEGG: 00513+3.2.1.52|KEGG: 00520+3.2.1.52|KEGG: 00531+3.2.1.52|KEGG: 00603+3.2.1.52|KEGG: 00604+3.2.1.52|MetaCyc: PWY-6902|MetaCyc: PWY-7822
Vas1_2310_GH20	640	Gene3D	G3DSA:3.20.20.80		258	638	6.9e-132	T	IPR013781	Glycoside hydrolase, catalytic domain	GO:0005975
Vas1_2310_GH20	640	PANTHER	PTHR22600		124	628	3.3e-156	T
Vas1_2310_GH20	640	Gene3D	G3DSA:3.30.379.10		135	257	5.9e-17	T	IPR029018	Chitobiase/beta-hexosaminidase domain 2-like		Reactome: R-HSA-1660662|Reactome: R-HSA-2022857|Reactome: R-HSA-2024101|Reactome: R-HSA-2160916
Vas1_2310_GH20	640	PRINTS	PR00738	Glycosyl hydrolase family 20 signature	589	606	3e-47	T	IPR025705	Beta-hexosaminidase	GO:0004563|GO:0005975	KEGG: 00511+3.2.1.52|KEGG: 00513+3.2.1.52|KEGG: 00520+3.2.1.52|KEGG: 00531+3.2.1.52|KEGG: 00603+3.2.1.52|KEGG: 00604+3.2.1.52|MetaCyc: PWY-6902|MetaCyc: PWY-7822|Reactome: R-HSA-1660662|Reactome: R-HSA-2022857|Reactome: R-HSA-2024101|Reactome: R-HSA-2160916
Vas1_2310_GH20	640	PRINTS	PR00738	Glycosyl hydrolase family 20 signature	218	238	3e-47	T	IPR025705	Beta-hexosaminidase	GO:0004563|GO:0005975	KEGG: 00511+3.2.1.52|KEGG: 00513+3.2.1.52|KEGG: 00520+3.2.1.52|KEGG: 00531+3.2.1.52|KEGG: 00603+3.2.1.52|KEGG: 00604+3.2.1.52|MetaCyc: PWY-6902|MetaCyc: PWY-7822|Reactome: R-HSA-1660662|Reactome: R-HSA-2022857|Reactome: R-HSA-2024101|Reactome: R-HSA-2160916
Vas1_2310_GH20	640	PRINTS	PR00738	Glycosyl hydrolase family 20 signature	402	420	3e-47	T	IPR025705	Beta-hexosaminidase	GO:0004563|GO:0005975	KEGG: 00511+3.2.1.52|KEGG: 00513+3.2.1.52|KEGG: 00520+3.2.1.52|KEGG: 00531+3.2.1.52|KEGG: 00603+3.2.1.52|KEGG: 00604+3.2.1.52|MetaCyc: PWY-6902|MetaCyc: PWY-7822|Reactome: R-HSA-1660662|Reactome: R-HSA-2022857|Reactome: R-HSA-2024101|Reactome: R-HSA-2160916
Vas1_2310_GH20	640	PRINTS	PR00738	Glycosyl hydrolase family 20 signature	571	587	3e-47	T	IPR025705	Beta-hexosaminidase	GO:0004563|GO:0005975	KEGG: 00511+3.2.1.52|KEGG: 00513+3.2.1.52|KEGG: 00520+3.2.1.52|KEGG: 00531+3.2.1.52|KEGG: 00603+3.2.1.52|KEGG: 00604+3.2.1.52|MetaCyc: PWY-6902|MetaCyc: PWY-7822|Reactome: R-HSA-1660662|Reactome: R-HSA-2022857|Reactome: R-HSA-2024101|Reactome: R-HSA-2160916
Vas1_2310_GH20	640	PRINTS	PR00738	Glycosyl hydrolase family 20 signature	353	370	3e-47	T	IPR025705	Beta-hexosaminidase	GO:0004563|GO:0005975	KEGG: 00511+3.2.1.52|KEGG: 00513+3.2.1.52|KEGG: 00520+3.2.1.52|KEGG: 00531+3.2.1.52|KEGG: 00603+3.2.1.52|KEGG: 00604+3.2.1.52|MetaCyc: PWY-6902|MetaCyc: PWY-7822|Reactome: R-HSA-1660662|Reactome: R-HSA-2022857|Reactome: R-HSA-2024101|Reactome: R-HSA-2160916
Vas1_2310_GH20	640	PRINTS	PR00738	Glycosyl hydrolase family 20 signature	283	304	3e-47	T	IPR025705	Beta-hexosaminidase	GO:0004563|GO:0005975	KEGG: 00511+3.2.1.52|KEGG: 00513+3.2.1.52|KEGG: 00520+3.2.1.52|KEGG: 00531+3.2.1.52|KEGG: 00603+3.2.1.52|KEGG: 00604+3.2.1.52|MetaCyc: PWY-6902|MetaCyc: PWY-7822|Reactome: R-HSA-1660662|Reactome: R-HSA-2022857|Reactome: R-HSA-2024101|Reactome: R-HSA-2160916
Vas1_2310_GH20	640	PRINTS	PR00738	Glycosyl hydrolase family 20 signature	254	271	3e-47	T	IPR025705	Beta-hexosaminidase	GO:0004563|GO:0005975	KEGG: 00511+3.2.1.52|KEGG: 00513+3.2.1.52|KEGG: 00520+3.2.1.52|KEGG: 00531+3.2.1.52|KEGG: 00603+3.2.1.52|KEGG: 00604+3.2.1.52|MetaCyc: PWY-6902|MetaCyc: PWY-7822|Reactome: R-HSA-1660662|Reactome: R-HSA-2022857|Reactome: R-HSA-2024101|Reactome: R-HSA-2160916
Vas1_2310_GH20	640	PRINTS	PR00738	Glycosyl hydrolase family 20 signature	424	437	3e-47	T	IPR025705	Beta-hexosaminidase	GO:0004563|GO:0005975	KEGG: 00511+3.2.1.52|KEGG: 00513+3.2.1.52|KEGG: 00520+3.2.1.52|KEGG: 00531+3.2.1.52|KEGG: 00603+3.2.1.52|KEGG: 00604+3.2.1.52|MetaCyc: PWY-6902|MetaCyc: PWY-7822|Reactome: R-HSA-1660662|Reactome: R-HSA-2022857|Reactome: R-HSA-2024101|Reactome: R-HSA-2160916
Vas1_2310_GH20	640	SUPERFAMILY	SSF55545		134	259	2.84e-17	T	IPR029018	Chitobiase/beta-hexosaminidase domain 2-like		Reactome: R-HSA-1660662|Reactome: R-HSA-2022857|Reactome: R-HSA-2024101|Reactome: R-HSA-2160916
Vas1_2310_GH20	640	CDD	cd06563	GH20_chitobiase-like	260	620	0	T
Vas1_2310_GH20	640	PANTHER	PTHR22600:SF28		124	628	3.3e-156	T
Vas1_2311_GH94	801	PANTHER	PTHR37469		1	801	0	T
Vas1_2311_GH94	801	CDD	cd11755	GH94N_ChBP_like	1	292	1.76118e-169	T
Vas1_2311_GH94	801	Gene3D	G3DSA:1.50.10.10		465	675	3.9e-08	T	IPR012341	Six-hairpin glycosidase	GO:0003824
Vas1_2311_GH94	801	Pfam	PF17167	Glycosyl hydrolase 36 superfamily, catalytic domain	296	728	6.7e-206	T	IPR033432	Glycosyl hydrolase 36, catalytic domain
Vas1_2311_GH94	801	Gene3D	G3DSA:2.60.420.10		720	781	2.9e-10	T
Vas1_2311_GH94	801	SMART	SM01068		1	63	6.4e-19	T	IPR009342	Putative carbohydrate binding domain
Vas1_2311_GH94	801	SUPERFAMILY	SSF74650		1	269	5.96e-83	T	IPR011013	Galactose mutarotase-like domain	GO:0003824|GO:0005975|GO:0030246
Vas1_2311_GH94	801	Gene3D	G3DSA:2.70.98.40		1	325	7.2e-102	T	IPR005196	Glycoside hydrolase, family 65, N-terminal	GO:0003824|GO:0005975
Vas1_2311_GH94	801	PANTHER	PTHR37469:SF5		1	801	0	T
Vas1_2311_GH94	801	Pfam	PF06165	Glycosyltransferase family 36	21	267	4.8e-85	T	IPR010383	Glycosyl hydrolase 94
Vas1_2311_GH94	801	SUPERFAMILY	SSF48208		274	801	6.8e-111	T	IPR008928	Six-hairpin glycosidase-like	GO:0003824
Vas1_2369_GH23	205	SignalP_GRAM_POSITIVE	SignalP-TM		1	30	-	T
Vas1_2369_GH23	205	SignalP_EUK	SignalP-noTM		1	22	-	T
Vas1_2369_GH23	205	SUPERFAMILY	SSF53955		17	169	6.75e-21	T	IPR023346	Lysozyme-like domain
Vas1_2369_GH23	205	Gene3D	G3DSA:1.10.530.10		49	167	6.5e-06	T
Vas1_2369_GH23	205	SignalP_GRAM_NEGATIVE	SignalP-noTM		1	20	-	T
Vas1_2369_GH23	205	ProSiteProfiles	PS51257	Prokaryotic membrane lipoprotein lipid attachment site profile.	1	22	5	T
Vas1_2369_GH23	205	CDD	cd00254	LT_GEWL	59	165	1.17187e-09	T
Vas1_34_GH13	694	SignalP_EUK	SignalP-noTM		1	21	-	T
Vas1_34_GH13	694	ProSiteProfiles	PS51257	Prokaryotic membrane lipoprotein lipid attachment site profile.	1	16	6	T
Vas1_34_GH13	694	Coils	Coil		475	495	-	T
Vas1_34_GH13	694	PANTHER	PTHR10357:SF181		70	693	2.1e-207	T
Vas1_34_GH13	694	SUPERFAMILY	SSF51445		194	328	3.83e-76	T	IPR017853	Glycoside hydrolase superfamily
Vas1_34_GH13	694	SUPERFAMILY	SSF51445		382	664	3.83e-76	T	IPR017853	Glycoside hydrolase superfamily
Vas1_34_GH13	694	SMART	SM00642		203	656	4.1e-76	T	IPR006047	Glycosyl hydrolase, family 13, catalytic domain	GO:0003824|GO:0005975
Vas1_34_GH13	694	Gene3D	G3DSA:3.20.20.80		195	664	8.4e-87	T	IPR013781	Glycoside hydrolase, catalytic domain	GO:0005975
Vas1_34_GH13	694	PIRSF	PIRSF036917		1	694	0	T	IPR014635	Alpha-amylase, MalS type	GO:0004556|GO:0005509|GO:0030980|GO:0042597|GO:0051692	KEGG: 00500+3.2.1.1
Vas1_34_GH13	694	Pfam	PF00128	Alpha amylase, catalytic domain	236	614	1.3e-39	T	IPR006047	Glycosyl hydrolase, family 13, catalytic domain	GO:0003824|GO:0005975
Vas1_34_GH13	694	PANTHER	PTHR10357		70	693	2.1e-207	T
Vas1_34_GH13	694	SignalP_GRAM_POSITIVE	SignalP-TM		1	21	-	T
Vas1_379_GH23	379	PANTHER	PTHR21666		1	375	6.2e-171	T
Vas1_379_GH23	379	ProSiteProfiles	PS51257	Prokaryotic membrane lipoprotein lipid attachment site profile.	1	16	6	T
Vas1_379_GH23	379	Pfam	PF11873	Domain of unknown function (DUF3393)	3	206	8.8e-77	T	IPR024570	Murein transglycosylase-C, N-terminal
Vas1_379_GH23	379	Gene3D	G3DSA:1.10.530.10		179	374	1.9e-40	T
Vas1_379_GH23	379	SignalP_EUK	SignalP-noTM		1	23	-	T
Vas1_379_GH23	379	CDD	cd00254	LT_GEWL	223	324	7.47061e-20	T
Vas1_379_GH23	379	ProSitePatterns	PS00922	Prokaryotic transglycosylases signature.	228	256	-	T	IPR000189	Prokaryotic transglycosylase, active site	GO:0000270|GO:0008933|GO:0016020
Vas1_379_GH23	379	Pfam	PF01464	Transglycosylase SLT domain	211	332	6.2e-28	T	IPR008258	Transglycosylase SLT domain 1
Vas1_379_GH23	379	SUPERFAMILY	SSF53955		206	371	5.63e-35	T	IPR023346	Lysozyme-like domain
Vas1_379_GH23	379	PANTHER	PTHR21666:SF232		1	375	6.2e-171	T
Vas1_561_GH3	327	ProSitePatterns	PS00775	Glycosyl hydrolases family 3 active site.	229	246	-	T	IPR019800	Glycoside hydrolase, family 3, active site	GO:0004553|GO:0005975
Vas1_561_GH3	327	SUPERFAMILY	SSF51445		2	282	6.53e-86	T	IPR017853	Glycoside hydrolase superfamily
Vas1_561_GH3	327	Hamap	MF_00364	Beta-hexosaminidase [nagZ].	3	326	44.941	T	IPR022956	Beta-hexosaminidase, bacterial	GO:0004563	KEGG: 00511+3.2.1.52|KEGG: 00513+3.2.1.52|KEGG: 00520+3.2.1.52|KEGG: 00531+3.2.1.52|KEGG: 00603+3.2.1.52|KEGG: 00604+3.2.1.52|MetaCyc: PWY-6902|MetaCyc: PWY-7822
Vas1_561_GH3	327	Pfam	PF00933	Glycosyl hydrolase family 3 N terminal domain	11	284	1.3e-84	T	IPR001764	Glycoside hydrolase, family 3, N-terminal	GO:0004553|GO:0005975
Vas1_561_GH3	327	PANTHER	PTHR30480		3	297	1.4e-106	T
Vas1_561_GH3	327	Gene3D	G3DSA:3.20.20.300		3	283	5.1e-93	T	IPR001764	Glycoside hydrolase, family 3, N-terminal	GO:0004553|GO:0005975
Vas1_561_GH3	327	PANTHER	PTHR30480:SF11		3	297	1.4e-106	T
Vas1_568_GH23	640	SignalP_GRAM_NEGATIVE	SignalP-noTM		1	24	-	T
Vas1_568_GH23	640	SUPERFAMILY	SSF53955		476	631	1.84e-47	T	IPR023346	Lysozyme-like domain
Vas1_568_GH23	640	Gene3D	G3DSA:1.10.530.10		471	629	1.6e-49	T
Vas1_568_GH23	640	Gene3D	G3DSA:1.10.1240.20		401	467	3e-26	T	IPR012289	Lytic transglycosylase, superhelical linker	GO:0004553|GO:0042597
Vas1_568_GH23	640	PANTHER	PTHR21666		289	603	7.9e-71	T
Vas1_568_GH23	640	Pfam	PF01464	Transglycosylase SLT domain	481	590	1.1e-29	T	IPR008258	Transglycosylase SLT domain 1
Vas1_568_GH23	640	SignalP_EUK	SignalP-noTM		1	24	-	T
Vas1_568_GH23	640	SUPERFAMILY	SSF48435		26	473	4.45e-113	T	IPR016026	Lytic transglycosylase, superhelical U-shaped and linker domain	GO:0004553|GO:0042597
Vas1_568_GH23	640	Pfam	PF14718	Soluble lytic murein transglycosylase L domain	404	467	3.8e-23	T	IPR012289	Lytic transglycosylase, superhelical linker	GO:0004553|GO:0042597
Vas1_568_GH23	640	SignalP_GRAM_POSITIVE	SignalP-TM		1	24	-	T
Vas1_568_GH23	640	Gene3D	G3DSA:1.25.20.10		26	384	4.9e-97	T	IPR008939	Lytic transglycosylase, superhelical U-shaped	GO:0004553|GO:0042597
Vas1_568_GH23	640	PANTHER	PTHR21666:SF240		289	603	7.9e-71	T
Vas1_568_GH23	640	CDD	cd00254	LT_GEWL	493	614	8.25218e-29	T
Vas1_575_GH23	489	SUPERFAMILY	SSF53955		305	462	2.25e-33	T	IPR023346	Lysozyme-like domain
Vas1_575_GH23	489	Gene3D	G3DSA:1.10.530.10		302	463	5.2e-37	T
Vas1_575_GH23	489	Gene3D	G3DSA:3.40.190.10		128	200	7.3e-05	T
Vas1_575_GH23	489	SUPERFAMILY	SSF53850		48	286	3.78e-32	T
Vas1_575_GH23	489	MobiDBLite	mobidb-lite	consensus disorder prediction	468	489	-	T
Vas1_575_GH23	489	Pfam	PF00497	Bacterial extracellular solute-binding proteins, family 3	60	270	5.6e-22	T	IPR001638	Solute-binding protein family 3/N-terminal domain of MltF
Vas1_575_GH23	489	CDD	cd01009	PBP2_YfhD_N	48	282	6.77103e-61	T
Vas1_575_GH23	489	SMART	SM00062		49	286	2.7e-13	T	IPR001638	Solute-binding protein family 3/N-terminal domain of MltF
Vas1_575_GH23	489	TMHMM	TMhelix	Region of a membrane-bound protein predicted to be embedded in the membrane.	7	29	-	T
Vas1_575_GH23	489	Pfam	PF01464	Transglycosylase SLT domain	308	419	8.1e-15	T	IPR008258	Transglycosylase SLT domain 1
Vas1_575_GH23	489	CDD	cd00254	LT_GEWL	324	454	2.38741e-18	T
Vas1_575_GH23	489	Gene3D	G3DSA:3.40.190.10		46	127	3.3e-19	T
Vas1_575_GH23	489	Gene3D	G3DSA:3.40.190.10		240	271	3.3e-19	T
Vas1_647_GH102	368	SUPERFAMILY	SSF50685		24	352	1.67e-99	T	IPR009009	RlpA-like protein, double-psi beta-barrel domain
Vas1_647_GH102	368	SignalP_GRAM_NEGATIVE	SignalP-noTM		1	18	-	T
Vas1_647_GH102	368	CDD	cd14668	mlta_B	130	256	1.70482e-47	T
Vas1_647_GH102	368	Pfam	PF03562	MltA specific insert domain	147	253	1.5e-31	T	IPR005300	Lytic transglycosylase MltA	GO:0004553
Vas1_647_GH102	368	SignalP_GRAM_POSITIVE	SignalP-TM		1	26	-	T
Vas1_647_GH102	368	SMART	SM00925		121	254	5.1e-62	T	IPR005300	Lytic transglycosylase MltA	GO:0004553
Vas1_647_GH102	368	CDD	cd14485	mltA_like_LT_A	227	350	7.47365e-31	T
Vas1_647_GH102	368	Gene3D	G3DSA:2.40.40.10		91	159	8.7e-08	T	IPR009009	RlpA-like protein, double-psi beta-barrel domain
Vas1_647_GH102	368	Gene3D	G3DSA:2.40.40.10		163	353	1e-41	T	IPR009009	RlpA-like protein, double-psi beta-barrel domain
Vas1_647_GH102	368	PANTHER	PTHR30124		6	366	5e-100	T
Vas1_647_GH102	368	SignalP_EUK	SignalP-noTM		1	20	-	T
Vas1_647_GH102	368	Pfam	PF06725	3D domain	274	350	1.3e-20	T	IPR010611	3D domain	GO:0004553|GO:0009254|GO:0019867
Vas1_681_GH23	520	SignalP_GRAM_NEGATIVE	SignalP-noTM		1	19	-	T
Vas1_681_GH23	520	SUPERFAMILY	SSF53955		255	405	8.13e-36	T	IPR023346	Lysozyme-like domain
Vas1_681_GH23	520	SUPERFAMILY	SSF53955		440	456	8.13e-36	T	IPR023346	Lysozyme-like domain
Vas1_681_GH23	520	Gene3D	G3DSA:1.10.530.10		295	472	1.2e-37	T
Vas1_681_GH23	520	PANTHER	PTHR21666:SF252		95	460	5.6e-27	T
Vas1_681_GH23	520	ProSitePatterns	PS00922	Prokaryotic transglycosylases signature.	317	345	-	T	IPR000189	Prokaryotic transglycosylase, active site	GO:0000270|GO:0008933|GO:0016020
Vas1_681_GH23	520	MobiDBLite	mobidb-lite	consensus disorder prediction	493	520	-	T
Vas1_681_GH23	520	CDD	cd00254	LT_GEWL	311	456	4.28292e-20	T
Vas1_681_GH23	520	SignalP_EUK	SignalP-noTM		1	24	-	T
Vas1_681_GH23	520	CDD	cd01009	PBP2_YfhD_N	39	274	2.61144e-73	T
Vas1_681_GH23	520	Hamap	MF_02016	Membrane-bound lytic murein transglycosylase F [mltF].	4	477	48.145	T	IPR023703	Membrane-bound lytic murein transglycosylase F	GO:0016837
Vas1_681_GH23	520	ProSiteProfiles	PS51257	Prokaryotic membrane lipoprotein lipid attachment site profile.	1	22	6	T
Vas1_681_GH23	520	PANTHER	PTHR21666		95	460	5.6e-27	T
Vas1_681_GH23	520	SMART	SM00062		40	276	4.7e-22	T	IPR001638	Solute-binding protein family 3/N-terminal domain of MltF
Vas1_681_GH23	520	SignalP_GRAM_POSITIVE	SignalP-TM		1	24	-	T
Vas1_681_GH23	520	Gene3D	G3DSA:3.40.190.10		16	131	3.2e-17	T
Vas1_681_GH23	520	Pfam	PF00497	Bacterial extracellular solute-binding proteins, family 3	41	275	1.6e-24	T	IPR001638	Solute-binding protein family 3/N-terminal domain of MltF
Vas1_681_GH23	520	SUPERFAMILY	SSF53850		41	275	7.6e-30	T
Vas1_681_GH23	520	Pfam	PF01464	Transglycosylase SLT domain	308	409	2.3e-21	T	IPR008258	Transglycosylase SLT domain 1
Vas1_720_GH13	561	SMART	SM00642		18	419	1.4e-161	T	IPR006047	Glycosyl hydrolase, family 13, catalytic domain	GO:0003824|GO:0005975
Vas1_720_GH13	561	Pfam	PF00128	Alpha amylase, catalytic domain	33	376	3.7e-127	T	IPR006047	Glycosyl hydrolase, family 13, catalytic domain	GO:0003824|GO:0005975
Vas1_720_GH13	561	Gene3D	G3DSA:3.20.20.80		8	109	5.8e-128	T	IPR013781	Glycoside hydrolase, catalytic domain	GO:0005975
Vas1_720_GH13	561	Gene3D	G3DSA:3.20.20.80		180	478	5.8e-128	T	IPR013781	Glycoside hydrolase, catalytic domain	GO:0005975
Vas1_720_GH13	561	Gene3D	G3DSA:2.60.40.1180		481	560	1e-15	T	IPR013780	Glycosyl hydrolase, all-beta
Vas1_720_GH13	561	TIGRFAM	TIGR02403	trehalose_treC: alpha,alpha-phosphotrehalase	10	557	1.2e-261	T	IPR012769	Trehalose-6-phosphate hydrolase	GO:0005737|GO:0005993|GO:0008788	KEGG: 00500+3.2.1.93
Vas1_720_GH13	561	SUPERFAMILY	SSF51445		9	476	4.7e-161	T	IPR017853	Glycoside hydrolase superfamily
Vas1_720_GH13	561	PANTHER	PTHR10357:SF193		8	559	2.9e-218	T
Vas1_720_GH13	561	CDD	cd11333	AmyAc_SI_OligoGlu_DGase	12	473	0	T
Vas1_720_GH13	561	SUPERFAMILY	SSF51011		480	559	5.28e-14	T
Vas1_720_GH13	561	Gene3D	G3DSA:3.90.400.10		110	179	1.1e-31	T
Vas1_720_GH13	561	PANTHER	PTHR10357		8	559	2.9e-218	T
Vas1_962_GH13	1325	PANTHER	PTHR43631		94	1082	4.9e-293	T
Vas1_962_GH13	1325	ProSiteProfiles	PS51257	Prokaryotic membrane lipoprotein lipid attachment site profile.	1	24	6	T
Vas1_962_GH13	1325	SUPERFAMILY	SSF81296		1102	1148	7.6e-06	T	IPR014756	Immunoglobulin E-set
Vas1_962_GH13	1325	SUPERFAMILY	SSF81296		310	413	2.97e-19	T	IPR014756	Immunoglobulin E-set
Vas1_962_GH13	1325	SUPERFAMILY	SSF51445		421	981	2.7e-122	T	IPR017853	Glycoside hydrolase superfamily
Vas1_962_GH13	1325	SUPERFAMILY	SSF49452		46	172	8.18e-28	T	IPR013784	Carbohydrate-binding-like fold	GO:0030246
Vas1_962_GH13	1325	SUPERFAMILY	SSF51011		984	1084	9.35e-30	T
Vas1_962_GH13	1325	Pfam	PF02922	Carbohydrate-binding module 48 (Isoamylase N-terminal domain)	313	397	4e-11	T	IPR004193	Glycoside hydrolase, family 13, N-terminal	GO:0004553|GO:0005975	Reactome: R-HSA-3322077
Vas1_962_GH13	1325	CDD	cd02860	E_set_Pullulanase	312	412	1.12286e-27	T
Vas1_962_GH13	1325	Pfam	PF00128	Alpha amylase, catalytic domain	588	622	0.00027	T	IPR006047	Glycosyl hydrolase, family 13, catalytic domain	GO:0003824|GO:0005975
Vas1_962_GH13	1325	CDD	cd02861	E_set_pullulanase_like	1210	1299	1.30774e-23	T
Vas1_962_GH13	1325	CDD	cd02861	E_set_pullulanase_like	1097	1180	2.08212e-27	T
Vas1_962_GH13	1325	CDD	cd11341	AmyAc_Pullulanase_LD-like	437	926	8.8414e-169	T
Vas1_962_GH13	1325	TIGRFAM	TIGR02103	pullul_strch: alpha-1,6-glucosidases, pullulanase-type	182	1081	0	T	IPR011839	Alpha-1,6-glucosidases, pullulanase-type	GO:0005975|GO:0051060
Vas1_962_GH13	1325	Pfam	PF11852	Domain of unknown function (DUF3372)	923	1081	6.9e-60	T	IPR024561	Alpha-1,6-glucosidases, pullulanase-type, C-terminal
Vas1_962_GH13	1325	Pfam	PF03714	Bacterial pullanase-associated domain	52	172	2e-15	T	IPR005323	Pullulanase, carbohydrate-binding module 41	GO:0005975|GO:0030246
Vas1_962_GH13	1325	SUPERFAMILY	SSF81296		172	298	7.56e-24	T	IPR014756	Immunoglobulin E-set
Vas1_962_GH13	1325	CDD	cd10315	CBM41_pullulanase	50	174	3.09893e-14	T	IPR005323	Pullulanase, carbohydrate-binding module 41	GO:0005975|GO:0030246
Vas1_962_GH13	1325	SMART	SM00642		532	942	0.001	T	IPR006047	Glycosyl hydrolase, family 13, catalytic domain	GO:0003824|GO:0005975
Vas1_962_GH13	1325	Pfam	PF16411	Outer membrane protein SusF_SusE	1114	1283	5.4e-07	T	IPR032187	Outer membrane protein SusF/SusE	GO:0019867|GO:2001070
Vas1_962_GH13	1325	Gene3D	G3DSA:2.60.40.10		313	412	6.6e-17	T	IPR013783	Immunoglobulin-like fold
Vas1_962_GH13	1325	Gene3D	G3DSA:3.20.20.80		557	798	1e-78	T	IPR013781	Glycoside hydrolase, catalytic domain	GO:0005975
Vas1_962_GH13	1325	Gene3D	G3DSA:3.20.20.80		956	977	1e-78	T	IPR013781	Glycoside hydrolase, catalytic domain	GO:0005975
Vas1_962_GH13	1325	Gene3D	G3DSA:3.20.20.80		423	506	1e-78	T	IPR013781	Glycoside hydrolase, catalytic domain	GO:0005975
Vas1_962_GH13	1325	Gene3D	G3DSA:3.20.20.80		830	921	1e-78	T	IPR013781	Glycoside hydrolase, catalytic domain	GO:0005975
Vas2_108_GH43	538	Pfam	PF04616	Glycosyl hydrolases family 43	2	302	2.7e-102	T	IPR006710	Glycoside hydrolase, family 43	GO:0004553|GO:0005975
Vas2_108_GH43	538	SUPERFAMILY	SSF49899		328	536	7.52e-59	T	IPR013320	Concanavalin A-like lectin/glucanase domain
Vas2_108_GH43	538	Gene3D	G3DSA:2.115.10.20		2	318	1.8e-96	T	IPR023296	Glycosyl hydrolase, five-bladed beta-propellor domain
Vas2_108_GH43	538	CDD	cd09000	GH43_XYL_1	4	302	3.7148e-159	T
Vas2_108_GH43	538	SUPERFAMILY	SSF75005		2	315	3.57e-101	T	IPR023296	Glycosyl hydrolase, five-bladed beta-propellor domain
Vas2_108_GH43	538	Gene3D	G3DSA:2.60.120.200		331	537	1.3e-59	T	IPR013320	Concanavalin A-like lectin/glucanase domain
Vas2_108_GH43	538	PANTHER	PTHR42812		2	536	8.2e-162	T
Vas2_108_GH43	538	PANTHER	PTHR42812:SF1		2	536	8.2e-162	T
Vas2_1256_GH18	853	CDD	cd02848	E_set_Chitinase_N	29	136	1.29765e-38	T
Vas2_1256_GH18	853	Pfam	PF00704	Glycosyl hydrolases family 18	167	581	2.7e-88	T	IPR001223	Glycoside hydrolase family 18, catalytic domain	GO:0004553|GO:0005975
Vas2_1256_GH18	853	SUPERFAMILY	SSF51445		141	467	2.55e-91	T	IPR017853	Glycoside hydrolase superfamily
Vas2_1256_GH18	853	SUPERFAMILY	SSF51445		554	595	2.55e-91	T	IPR017853	Glycoside hydrolase superfamily
Vas2_1256_GH18	853	PANTHER	PTHR11177:SF257		167	582	3.1e-50	T
Vas2_1256_GH18	853	SUPERFAMILY	SSF81296		27	139	1.82e-31	T	IPR014756	Immunoglobulin E-set
Vas2_1256_GH18	853	SignalP_GRAM_POSITIVE	SignalP-TM		1	27	-	T
Vas2_1256_GH18	853	CDD	cd12215	ChiC_BD	803	844	2.35478e-15	T
Vas2_1256_GH18	853	SMART	SM00495		800	845	5.7e-09	T	IPR003610	Carbohydrate-binding module family 5/12	GO:0004553|GO:0005576|GO:0005975|GO:0030246
Vas2_1256_GH18	853	SUPERFAMILY	SSF54556		467	552	4.89e-17	T	IPR029070	Chitinase insertion domain
Vas2_1256_GH18	853	SignalP_GRAM_NEGATIVE	SignalP-noTM		1	27	-	T
Vas2_1256_GH18	853	SMART	SM00089		57	140	1.1	T	IPR022409	PKD/Chitinase domain
Vas2_1256_GH18	853	SMART	SM00089		606	696	6.7	T	IPR022409	PKD/Chitinase domain
Vas2_1256_GH18	853	SMART	SM00089		705	792	0.22	T	IPR022409	PKD/Chitinase domain
Vas2_1256_GH18	853	SUPERFAMILY	SSF51055		791	847	4.12e-13	T	IPR003610	Carbohydrate-binding module family 5/12	GO:0004553|GO:0005576|GO:0005975|GO:0030246
Vas2_1256_GH18	853	ProSitePatterns	PS01095	Chitinases family 18 active site.	313	321	-	T	IPR001579	Glycoside hydrolase, chitinase active site	GO:0004553|GO:0005975	KEGG: 00520+3.2.1.14|MetaCyc: PWY-6855|MetaCyc: PWY-6902|MetaCyc: PWY-7822
Vas2_1256_GH18	853	Gene3D	G3DSA:3.20.20.80		144	468	2.6e-117	T	IPR013781	Glycoside hydrolase, catalytic domain	GO:0005975
Vas2_1256_GH18	853	Gene3D	G3DSA:3.20.20.80		558	598	2.6e-117	T	IPR013781	Glycoside hydrolase, catalytic domain	GO:0005975
Vas2_1256_GH18	853	Gene3D	G3DSA:2.60.40.670		711	790	7.8e-05	T	IPR000601	PKD domain
Vas2_1256_GH18	853	SMART	SM00636		165	581	1.1e-160	T	IPR011583	Chitinase II	GO:0004568|GO:0006032
Vas2_1256_GH18	853	Pfam	PF08329	Chitinase A, N-terminal domain	27	162	4.9e-52	T	IPR013540	Chitinase A N-terminal	GO:0004568|GO:0006032	KEGG: 00520+3.2.1.14|MetaCyc: PWY-6855|MetaCyc: PWY-6902|MetaCyc: PWY-7822
Vas2_1256_GH18	853	Gene3D	G3DSA:3.10.50.10		469	555	1.7e-24	T	IPR029070	Chitinase insertion domain
Vas2_1256_GH18	853	Gene3D	G3DSA:2.60.40.10		29	138	3.2e-38	T	IPR013783	Immunoglobulin-like fold
Vas2_1256_GH18	853	Gene3D	G3DSA:2.10.10.20		798	843	7.2e-16	T	IPR003610	Carbohydrate-binding module family 5/12	GO:0004553|GO:0005576|GO:0005975|GO:0030246
Vas2_1256_GH18	853	CDD	cd00146	PKD	705	789	0.000527062	T
Vas2_1256_GH18	853	CDD	cd06548	GH18_chitinase	167	581	1.13738e-127	T
Vas2_1256_GH18	853	Pfam	PF02839	Carbohydrate binding domain	803	842	7.8e-09	T	IPR003610	Carbohydrate-binding module family 5/12	GO:0004553|GO:0005576|GO:0005975|GO:0030246
Vas2_1256_GH18	853	SUPERFAMILY	SSF49299		702	790	2.75e-05	T	IPR000601	PKD domain
Vas2_1256_GH18	853	SignalP_EUK	SignalP-noTM		1	27	-	T
Vas2_1256_GH18	853	PANTHER	PTHR11177		167	582	3.1e-50	T
Vas2_1261_GH13	728	PANTHER	PTHR43651		81	727	6.6e-203	T
Vas2_1261_GH13	728	Pfam	PF00128	Alpha amylase, catalytic domain	275	349	2.5e-06	T	IPR006047	Glycosyl hydrolase, family 13, catalytic domain	GO:0003824|GO:0005975
Vas2_1261_GH13	728	Gene3D	G3DSA:2.60.40.1180		623	725	1.5e-27	T	IPR013780	Glycosyl hydrolase, all-beta
Vas2_1261_GH13	728	Hamap	MF_00685	1,4-alpha-glucan branching enzyme GlgB [glgB].	91	726	40.904	T	IPR006407	1,4-alpha-glucan-branching enzyme, GlgB	GO:0003844|GO:0005978	KEGG: 00500+2.4.1.18|MetaCyc: PWY-5067|MetaCyc: PWY-622|Reactome: R-HSA-3322077
Vas2_1261_GH13	728	Gene3D	G3DSA:2.60.40.10		115	222	2.1e-28	T	IPR013783	Immunoglobulin-like fold
Vas2_1261_GH13	728	Gene3D	G3DSA:2.60.40.10		17	102	4.7e-13	T	IPR013783	Immunoglobulin-like fold
Vas2_1261_GH13	728	SMART	SM00642		257	595	1.1e-06	T	IPR006047	Glycosyl hydrolase, family 13, catalytic domain	GO:0003824|GO:0005975
Vas2_1261_GH13	728	CDD	cd11322	AmyAc_Glg_BE	214	612	0	T
Vas2_1261_GH13	728	TIGRFAM	TIGR01515	branching_enzym: 1,4-alpha-glucan branching enzyme	115	722	2.8e-245	T	IPR006407	1,4-alpha-glucan-branching enzyme, GlgB	GO:0003844|GO:0005978	KEGG: 00500+2.4.1.18|MetaCyc: PWY-5067|MetaCyc: PWY-622|Reactome: R-HSA-3322077
Vas2_1261_GH13	728	PIRSF	PIRSF000463		11	728	7.8e-279	T	IPR006407	1,4-alpha-glucan-branching enzyme, GlgB	GO:0003844|GO:0005978	KEGG: 00500+2.4.1.18|MetaCyc: PWY-5067|MetaCyc: PWY-622|Reactome: R-HSA-3322077
Vas2_1261_GH13	728	SUPERFAMILY	SSF81296		21	104	6.12e-14	T	IPR014756	Immunoglobulin E-set
Vas2_1261_GH13	728	PANTHER	PTHR43651:SF1		81	727	6.6e-203	T
Vas2_1261_GH13	728	Pfam	PF02922	Carbohydrate-binding module 48 (Isoamylase N-terminal domain)	131	207	7.4e-20	T	IPR004193	Glycoside hydrolase, family 13, N-terminal	GO:0004553|GO:0005975	Reactome: R-HSA-3322077
Vas2_1261_GH13	728	Pfam	PF02806	Alpha amylase, C-terminal all-beta domain	628	725	2.2e-17	T	IPR006048	Alpha-amylase/branching enzyme, C-terminal all beta	GO:0003824|GO:0005975|GO:0043169	KEGG: 00500+2.4.1.18|MetaCyc: PWY-5067|MetaCyc: PWY-622
Vas2_1261_GH13	728	SUPERFAMILY	SSF51011		623	726	6.48e-27	T
Vas2_1261_GH13	728	SUPERFAMILY	SSF81296		138	193	4.2e-07	T	IPR014756	Immunoglobulin E-set
Vas2_1261_GH13	728	SUPERFAMILY	SSF51445		179	616	5.97e-109	T	IPR017853	Glycoside hydrolase superfamily
Vas2_1261_GH13	728	Gene3D	G3DSA:3.20.20.80		237	611	7.4e-90	T	IPR013781	Glycoside hydrolase, catalytic domain	GO:0005975
Vas2_1261_GH13	728	CDD	cd02855	E_set_GBE_prok_N	118	222	7.16305e-39	T
Vas2_1262_GH77	726	PANTHER	PTHR32438		6	723	1.5e-190	T	IPR003385	Glycoside hydrolase, family 77	GO:0004134|GO:0005975	KEGG: 00500+2.4.1.25|MetaCyc: PWY-5941|MetaCyc: PWY-6724|MetaCyc: PWY-6737|MetaCyc: PWY-7238
Vas2_1262_GH77	726	Gene3D	G3DSA:3.20.20.80		170	607	1.6e-157	T	IPR013781	Glycoside hydrolase, catalytic domain	GO:0005975
Vas2_1262_GH77	726	Gene3D	G3DSA:3.20.20.80		646	712	1.6e-157	T	IPR013781	Glycoside hydrolase, catalytic domain	GO:0005975
Vas2_1262_GH77	726	TIGRFAM	TIGR00217	malQ: 4-alpha-glucanotransferase	127	717	4e-190	T	IPR003385	Glycoside hydrolase, family 77	GO:0004134|GO:0005975	KEGG: 00500+2.4.1.25|MetaCyc: PWY-5941|MetaCyc: PWY-6724|MetaCyc: PWY-6737|MetaCyc: PWY-7238
Vas2_1262_GH77	726	SUPERFAMILY	SSF51445		633	718	1.57e-147	T	IPR017853	Glycoside hydrolase superfamily
Vas2_1262_GH77	726	SUPERFAMILY	SSF51445		161	594	1.57e-147	T	IPR017853	Glycoside hydrolase superfamily
Vas2_1262_GH77	726	Pfam	PF02446	4-alpha-glucanotransferase	177	699	8.1e-127	T	IPR003385	Glycoside hydrolase, family 77	GO:0004134|GO:0005975	KEGG: 00500+2.4.1.25|MetaCyc: PWY-5941|MetaCyc: PWY-6724|MetaCyc: PWY-6737|MetaCyc: PWY-7238
Vas2_127_GH5	382	SignalP_EUK	SignalP-noTM		1	24	-	T
Vas2_127_GH5	382	PANTHER	PTHR31297		53	381	3.1e-83	T
Vas2_127_GH5	382	ProSitePatterns	PS00659	Glycosyl hydrolases family 5 signature.	182	191	-	T	IPR018087	Glycoside hydrolase, family 5, conserved site	GO:0004553|GO:0005975
Vas2_127_GH5	382	PANTHER	PTHR31297:SF22		53	381	3.1e-83	T
Vas2_127_GH5	382	Gene3D	G3DSA:3.20.20.80		44	372	1.9e-57	T	IPR013781	Glycoside hydrolase, catalytic domain	GO:0005975
Vas2_127_GH5	382	SignalP_GRAM_POSITIVE	SignalP-TM		1	30	-	T
Vas2_127_GH5	382	Pfam	PF00150	Cellulase (glycosyl hydrolase family 5)	65	356	1.1e-36	T	IPR001547	Glycoside hydrolase, family 5	GO:0004553|GO:0005975
Vas2_127_GH5	382	SUPERFAMILY	SSF51445		50	375	3.24e-49	T	IPR017853	Glycoside hydrolase superfamily
Vas2_1287_GH13	661	SUPERFAMILY	SSF51445		480	550	3.84e-97	T	IPR017853	Glycoside hydrolase superfamily
Vas2_1287_GH13	661	SUPERFAMILY	SSF51445		122	451	3.84e-97	T	IPR017853	Glycoside hydrolase superfamily
Vas2_1287_GH13	661	Pfam	PF02922	Carbohydrate-binding module 48 (Isoamylase N-terminal domain)	19	96	0.00018	T	IPR004193	Glycoside hydrolase, family 13, N-terminal	GO:0004553|GO:0005975	Reactome: R-HSA-3322077
Vas2_1287_GH13	661	Gene3D	G3DSA:3.20.20.80		140	550	2.9e-81	T	IPR013781	Glycoside hydrolase, catalytic domain	GO:0005975
Vas2_1287_GH13	661	Gene3D	G3DSA:2.60.40.10		17	139	4.9e-17	T	IPR013783	Immunoglobulin-like fold
Vas2_1287_GH13	661	PANTHER	PTHR43002:SF2		16	640	6.2e-199	T
Vas2_1287_GH13	661	TIGRFAM	TIGR02100	glgX_debranch: glycogen debranching enzyme GlgX	17	656	9.9e-197	T	IPR011837	Glycogen debranching enzyme, GlgX type	GO:0004133|GO:0004553|GO:0005980
Vas2_1287_GH13	661	PANTHER	PTHR43002		16	640	6.2e-199	T
Vas2_1287_GH13	661	SUPERFAMILY	SSF81296		17	132	1.75e-14	T	IPR014756	Immunoglobulin E-set
Vas2_1287_GH13	661	SUPERFAMILY	SSF51011		565	656	9.35e-13	T
Vas2_1287_GH13	661	SMART	SM00642		121	548	7.7e-05	T	IPR006047	Glycosyl hydrolase, family 13, catalytic domain	GO:0003824|GO:0005975
Vas2_1287_GH13	661	MobiDBLite	mobidb-lite	consensus disorder prediction	446	470	-	T
Vas2_1287_GH13	661	Gene3D	G3DSA:2.60.40.1180		565	648	7.5e-09	T	IPR013780	Glycosyl hydrolase, all-beta
Vas2_1287_GH13	661	Pfam	PF00128	Alpha amylase, catalytic domain	185	259	2.7e-05	T	IPR006047	Glycosyl hydrolase, family 13, catalytic domain	GO:0003824|GO:0005975
Vas2_1287_GH13	661	CDD	cd11326	AmyAc_Glg_debranch	127	551	0	T
Vas2_1290_GH13	529	ProSiteProfiles	PS51257	Prokaryotic membrane lipoprotein lipid attachment site profile.	1	21	6	T
Vas2_1290_GH13	529	PANTHER	PTHR43862:SF1		45	519	1.4e-82	T
Vas2_1290_GH13	529	Gene3D	G3DSA:2.60.40.1180		457	526	1.1e-07	T	IPR013780	Glycosyl hydrolase, all-beta
Vas2_1290_GH13	529	SignalP_EUK	SignalP-noTM		1	20	-	T
Vas2_1290_GH13	529	SignalP_GRAM_POSITIVE	SignalP-TM		1	26	-	T
Vas2_1290_GH13	529	SUPERFAMILY	SSF51011		458	525	1.6e-07	T
Vas2_1290_GH13	529	SUPERFAMILY	SSF51445		49	450	9.62e-70	T	IPR017853	Glycoside hydrolase superfamily
Vas2_1290_GH13	529	SMART	SM00642		54	440	5.5e-33	T	IPR006047	Glycosyl hydrolase, family 13, catalytic domain	GO:0003824|GO:0005975
Vas2_1290_GH13	529	PANTHER	PTHR43862		45	519	1.4e-82	T
Vas2_1290_GH13	529	Gene3D	G3DSA:3.20.20.80		49	449	9.6e-65	T	IPR013781	Glycoside hydrolase, catalytic domain	GO:0005975
Vas2_1290_GH13	529	Pfam	PF00128	Alpha amylase, catalytic domain	198	383	6.7e-15	T	IPR006047	Glycosyl hydrolase, family 13, catalytic domain	GO:0003824|GO:0005975
Vas2_1290_GH13	529	Pfam	PF00128	Alpha amylase, catalytic domain	80	167	1.4e-26	T	IPR006047	Glycosyl hydrolase, family 13, catalytic domain	GO:0003824|GO:0005975
Vas2_1290_GH13	529	SignalP_GRAM_NEGATIVE	SignalP-noTM		1	20	-	T
Vas2_1291_GH13	596	PIRSF	PIRSF036918		1	591	1.7e-238	T	IPR017069	Maltodextrin glucosidase	GO:0004558|GO:0005737|GO:0005975	KEGG: 00052+3.2.1.20|KEGG: 00500+3.2.1.20|MetaCyc: PWY-842
Vas2_1291_GH13	596	SMART	SM00642		127	524	3.1e-96	T	IPR006047	Glycosyl hydrolase, family 13, catalytic domain	GO:0003824|GO:0005975
Vas2_1291_GH13	596	Pfam	PF00128	Alpha amylase, catalytic domain	179	497	2.6e-80	T	IPR006047	Glycosyl hydrolase, family 13, catalytic domain	GO:0003824|GO:0005975
Vas2_1291_GH13	596	Gene3D	G3DSA:3.20.20.80		119	525	3.7e-116	T	IPR013781	Glycoside hydrolase, catalytic domain	GO:0005975
Vas2_1291_GH13	596	Gene3D	G3DSA:2.60.40.10		5	118	3.1e-10	T	IPR013783	Immunoglobulin-like fold
Vas2_1291_GH13	596	CDD	cd02857	E_set_CDase_PDE_N	20	112	7.0595e-09	T	IPR004185	Glycoside hydrolase, family 13, N-terminal Ig-like domain	GO:0004553|GO:0005975
Vas2_1291_GH13	596	SUPERFAMILY	SSF51011		533	586	4.01e-05	T
Vas2_1291_GH13	596	PANTHER	PTHR43862:SF1		20	577	3.7e-164	T
Vas2_1291_GH13	596	SUPERFAMILY	SSF81296		1	109	1.76e-15	T	IPR014756	Immunoglobulin E-set
Vas2_1291_GH13	596	Gene3D	G3DSA:2.60.40.1180		528	575	3.7e-08	T	IPR013780	Glycosyl hydrolase, all-beta
Vas2_1291_GH13	596	SUPERFAMILY	SSF51445		116	533	2.23e-104	T	IPR017853	Glycoside hydrolase superfamily
Vas2_1291_GH13	596	PANTHER	PTHR43862		20	577	3.7e-164	T
Vas2_1291_GH13	596	CDD	cd11338	AmyAc_CMD	122	535	0	T
Vas2_1315_GH109	326	Gene3D	G3DSA:3.40.50.720		1	141	1.7e-41	T	IPR016040	NAD(P)-binding domain
Vas2_1315_GH109	326	Gene3D	G3DSA:3.30.360.10		142	324	4.3e-66	T
Vas2_1315_GH109	326	Pfam	PF01408	Oxidoreductase family, NAD-binding Rossmann fold	2	118	2.7e-25	T	IPR000683	Oxidoreductase, N-terminal	GO:0016491
Vas2_1315_GH109	326	PANTHER	PTHR43054:SF1		1	324	7.3e-133	T
Vas2_1315_GH109	326	SUPERFAMILY	SSF55347		127	290	9.65e-24	T
Vas2_1315_GH109	326	SUPERFAMILY	SSF51735		2	152	1.03e-41	T	IPR016040	NAD(P)-binding domain
Vas2_1315_GH109	326	PANTHER	PTHR43054		1	324	7.3e-133	T
Vas2_1437_GH109	336	SUPERFAMILY	SSF51735		4	159	5.49e-56	T	IPR016040	NAD(P)-binding domain
Vas2_1437_GH109	336	Gene3D	G3DSA:3.30.360.10		149	330	2.9e-47	T
Vas2_1437_GH109	336	PANTHER	PTHR22604		5	329	5.6e-79	T
Vas2_1437_GH109	336	Pfam	PF01408	Oxidoreductase family, NAD-binding Rossmann fold	9	125	1.4e-27	T	IPR000683	Oxidoreductase, N-terminal	GO:0016491
Vas2_1437_GH109	336	Gene3D	G3DSA:3.40.50.720		4	148	1e-53	T	IPR016040	NAD(P)-binding domain
Vas2_1437_GH109	336	SUPERFAMILY	SSF55347		133	297	1.54e-39	T
Vas2_150_GH4	447	Pfam	PF11975	Family 4 glycosyl hydrolase C-terminal domain	196	409	5.6e-48	T	IPR022616	Glycosyl hydrolase, family 4, C-terminal	GO:0004553
Vas2_150_GH4	447	PANTHER	PTHR32092:SF10		3	433	9.9e-157	T
Vas2_150_GH4	447	PRINTS	PR00732	Glycosyl hydrolase family 4 signature	6	21	1.2e-37	T	IPR001088	Glycoside hydrolase, family 4	GO:0004553|GO:0005975
Vas2_150_GH4	447	PRINTS	PR00732	Glycosyl hydrolase family 4 signature	141	158	1.2e-37	T	IPR001088	Glycoside hydrolase, family 4	GO:0004553|GO:0005975
Vas2_150_GH4	447	PRINTS	PR00732	Glycosyl hydrolase family 4 signature	98	111	1.2e-37	T	IPR001088	Glycoside hydrolase, family 4	GO:0004553|GO:0005975
Vas2_150_GH4	447	PRINTS	PR00732	Glycosyl hydrolase family 4 signature	112	132	1.2e-37	T	IPR001088	Glycoside hydrolase, family 4	GO:0004553|GO:0005975
Vas2_150_GH4	447	PRINTS	PR00732	Glycosyl hydrolase family 4 signature	77	93	1.2e-37	T	IPR001088	Glycoside hydrolase, family 4	GO:0004553|GO:0005975
Vas2_150_GH4	447	PRINTS	PR00732	Glycosyl hydrolase family 4 signature	166	177	1.2e-37	T	IPR001088	Glycoside hydrolase, family 4	GO:0004553|GO:0005975
Vas2_150_GH4	447	PRINTS	PR00732	Glycosyl hydrolase family 4 signature	192	204	1.2e-37	T	IPR001088	Glycoside hydrolase, family 4	GO:0004553|GO:0005975
Vas2_150_GH4	447	ProSitePatterns	PS01324	Glycosyl hydrolases family 4 signature.	141	171	-	T	IPR019802	Glycoside hydrolase, family 4, conserved site	GO:0004553|GO:0005975
Vas2_150_GH4	447	Gene3D	G3DSA:3.40.50.720		3	168	6.5e-62	T	IPR016040	NAD(P)-binding domain
Vas2_150_GH4	447	SUPERFAMILY	SSF51735		4	169	1.69e-49	T	IPR016040	NAD(P)-binding domain
Vas2_150_GH4	447	Pfam	PF02056	Family 4 glycosyl hydrolase	6	186	5.3e-56	T	IPR001088	Glycoside hydrolase, family 4	GO:0004553|GO:0005975
Vas2_150_GH4	447	PANTHER	PTHR32092		3	433	9.9e-157	T	IPR001088	Glycoside hydrolase, family 4	GO:0004553|GO:0005975
Vas2_150_GH4	447	CDD	cd05296	GH4_P_beta_glucosidase	5	427	0	T
Vas2_150_GH4	447	Gene3D	G3DSA:3.90.110.10		169	433	3.4e-83	T	IPR015955	Lactate dehydrogenase/glycoside hydrolase, family 4, C-terminal	GO:0003824|GO:0005975|GO:0016616|GO:0055114
Vas2_150_GH4	447	SUPERFAMILY	SSF56327		172	435	1.37e-71	T	IPR015955	Lactate dehydrogenase/glycoside hydrolase, family 4, C-terminal	GO:0003824|GO:0005975|GO:0016616|GO:0055114
Vas2_250_GH8	424	SignalP_GRAM_NEGATIVE	SignalP-noTM		1	24	-	T
Vas2_250_GH8	424	SignalP_EUK	SignalP-noTM		1	24	-	T
Vas2_250_GH8	424	Pfam	PF01270	Glycosyl hydrolases family 8	81	416	3.3e-20	T	IPR002037	Glycoside hydrolase, family 8	GO:0004553|GO:0005975	KEGG: 00500+3.2.1.4|MetaCyc: PWY-6788
Vas2_250_GH8	424	SUPERFAMILY	SSF48208		29	424	1.16e-98	T	IPR008928	Six-hairpin glycosidase-like	GO:0003824
Vas2_250_GH8	424	TMHMM	TMhelix	Region of a membrane-bound protein predicted to be embedded in the membrane.	5	27	-	T
Vas2_250_GH8	424	PRINTS	PR00735	Glycosyl hydrolase family 8 signature	302	311	1.5e-05	T	IPR002037	Glycoside hydrolase, family 8	GO:0004553|GO:0005975	KEGG: 00500+3.2.1.4|MetaCyc: PWY-6788
Vas2_250_GH8	424	PRINTS	PR00735	Glycosyl hydrolase family 8 signature	99	112	1.5e-05	T	IPR002037	Glycoside hydrolase, family 8	GO:0004553|GO:0005975	KEGG: 00500+3.2.1.4|MetaCyc: PWY-6788
Vas2_250_GH8	424	PRINTS	PR00735	Glycosyl hydrolase family 8 signature	404	418	1.5e-05	T	IPR002037	Glycoside hydrolase, family 8	GO:0004553|GO:0005975	KEGG: 00500+3.2.1.4|MetaCyc: PWY-6788
Vas2_250_GH8	424	SignalP_GRAM_POSITIVE	SignalP-TM		1	24	-	T
Vas2_250_GH8	424	Gene3D	G3DSA:1.50.10.10		33	423	6.4e-96	T	IPR012341	Six-hairpin glycosidase	GO:0003824
Vas2_301_GH13	410	CDD	cd11313	AmyAc_arch_bac_AmyA	9	349	1.60374e-172	T
Vas2_301_GH13	410	SMART	SM00642		4	340	6.1e-11	T	IPR006047	Glycosyl hydrolase, family 13, catalytic domain	GO:0003824|GO:0005975
Vas2_301_GH13	410	PANTHER	PTHR10357		7	391	1.3e-52	T
Vas2_301_GH13	410	SUPERFAMILY	SSF51445		6	349	1.13e-78	T	IPR017853	Glycoside hydrolase superfamily
Vas2_301_GH13	410	Gene3D	G3DSA:3.20.20.80		4	344	4e-74	T	IPR013781	Glycoside hydrolase, catalytic domain	GO:0005975
Vas2_301_GH13	410	Pfam	PF00128	Alpha amylase, catalytic domain	27	310	2.3e-36	T	IPR006047	Glycosyl hydrolase, family 13, catalytic domain	GO:0003824|GO:0005975
Vas2_434_GH9	762	PANTHER	PTHR22298:SF62		245	759	9.3e-60	T
Vas2_434_GH9	762	ProSitePatterns	PS00698	Glycosyl hydrolases family 9 active sites signature 2.	729	747	-	T	IPR033126	Glycosyl hydrolases family 9, Asp/Glu active sites		KEGG: 00500+3.2.1.4|MetaCyc: PWY-6788
Vas2_434_GH9	762	Gene3D	G3DSA:1.50.10.10		260	757	1.2e-149	T	IPR012341	Six-hairpin glycosidase	GO:0003824
Vas2_434_GH9	762	Pfam	PF00759	Glycosyl hydrolase family 9	261	752	4.5e-101	T	IPR001701	Glycoside hydrolase family 9	GO:0004553|GO:0005975	KEGG: 00500+3.2.1.4|MetaCyc: PWY-6788
Vas2_434_GH9	762	SUPERFAMILY	SSF81296		169	257	1.4e-09	T	IPR014756	Immunoglobulin E-set
Vas2_434_GH9	762	SignalP_GRAM_POSITIVE	SignalP-TM		1	23	-	T
Vas2_434_GH9	762	Pfam	PF02927	Cellulase N-terminal ig-like domain	169	238	7.3e-10	T	IPR004197	Cellulase, Ig-like domain	GO:0005975|GO:0008810
Vas2_434_GH9	762	PANTHER	PTHR22298		245	759	9.3e-60	T
Vas2_434_GH9	762	CDD	cd02850	E_set_Cellulase_N	172	256	5.16499e-11	T	IPR004197	Cellulase, Ig-like domain	GO:0005975|GO:0008810
Vas2_434_GH9	762	ProSitePatterns	PS00592	Glycosyl hydrolases family 9 active sites signature 1.	668	684	-	T	IPR018221	Glycoside hydrolase family 9, His active site		KEGG: 00500+3.2.1.4|MetaCyc: PWY-6788
Vas2_434_GH9	762	SignalP_GRAM_NEGATIVE	SignalP-noTM		1	23	-	T
Vas2_434_GH9	762	Gene3D	G3DSA:2.60.40.10		169	257	1.6e-16	T	IPR013783	Immunoglobulin-like fold
Vas2_434_GH9	762	Pfam	PF02018	Carbohydrate binding domain	25	145	2e-18	T	IPR003305	Carbohydrate-binding, CenC-like	GO:0016798
Vas2_434_GH9	762	SUPERFAMILY	SSF49785		23	158	9.01e-32	T	IPR008979	Galactose-binding domain-like
Vas2_434_GH9	762	SignalP_EUK	SignalP-noTM		1	23	-	T
Vas2_434_GH9	762	Gene3D	G3DSA:2.60.120.260		23	159	3e-38	T	IPR008979	Galactose-binding domain-like
Vas2_434_GH9	762	SUPERFAMILY	SSF48208		259	757	1.57e-118	T	IPR008928	Six-hairpin glycosidase-like	GO:0003824
Vas2_57_GH3	737	PANTHER	PTHR30620:SF67		4	726	3.3e-202	T
Vas2_57_GH3	737	Pfam	PF14310	Fibronectin type III-like domain	650	719	3.9e-20	T	IPR026891	Fibronectin type III-like domain
Vas2_57_GH3	737	SMART	SM01217		650	719	8e-26	T	IPR026891	Fibronectin type III-like domain
Vas2_57_GH3	737	SUPERFAMILY	SSF52279		369	616	2.62e-42	T	IPR002772	Glycoside hydrolase family 3 C-terminal domain	GO:0004553|GO:0005975
Vas2_57_GH3	737	Pfam	PF01915	Glycosyl hydrolase family 3 C-terminal domain	369	610	6.8e-42	T	IPR002772	Glycoside hydrolase family 3 C-terminal domain	GO:0004553|GO:0005975
Vas2_57_GH3	737	Gene3D	G3DSA:3.40.50.1700		354	616	4.7e-59	T	IPR002772	Glycoside hydrolase family 3 C-terminal domain	GO:0004553|GO:0005975
Vas2_57_GH3	737	Pfam	PF00933	Glycosyl hydrolase family 3 N terminal domain	24	330	1.6e-69	T	IPR001764	Glycoside hydrolase, family 3, N-terminal	GO:0004553|GO:0005975
Vas2_57_GH3	737	Gene3D	G3DSA:3.20.20.300		4	340	5.8e-112	T	IPR001764	Glycoside hydrolase, family 3, N-terminal	GO:0004553|GO:0005975
Vas2_57_GH3	737	PRINTS	PR00133	Glycosyl hydrolase family 3 signature	97	116	1.7e-22	T	IPR001764	Glycoside hydrolase, family 3, N-terminal	GO:0004553|GO:0005975
Vas2_57_GH3	737	PRINTS	PR00133	Glycosyl hydrolase family 3 signature	251	269	1.7e-22	T	IPR001764	Glycoside hydrolase, family 3, N-terminal	GO:0004553|GO:0005975
Vas2_57_GH3	737	PRINTS	PR00133	Glycosyl hydrolase family 3 signature	73	89	1.7e-22	T	IPR001764	Glycoside hydrolase, family 3, N-terminal	GO:0004553|GO:0005975
Vas2_57_GH3	737	PRINTS	PR00133	Glycosyl hydrolase family 3 signature	180	196	1.7e-22	T	IPR001764	Glycoside hydrolase, family 3, N-terminal	GO:0004553|GO:0005975
Vas2_57_GH3	737	PRINTS	PR00133	Glycosyl hydrolase family 3 signature	143	159	1.7e-22	T	IPR001764	Glycoside hydrolase, family 3, N-terminal	GO:0004553|GO:0005975
Vas2_57_GH3	737	PANTHER	PTHR30620		4	726	3.3e-202	T
Vas2_57_GH3	737	SUPERFAMILY	SSF51445		4	368	7.26e-108	T	IPR017853	Glycoside hydrolase superfamily
Vas2_607_GH109	385	SUPERFAMILY	SSF51735		2	169	7.89e-33	T	IPR016040	NAD(P)-binding domain
Vas2_607_GH109	385	PANTHER	PTHR43708		3	383	2.4e-115	T
Vas2_607_GH109	385	Gene3D	G3DSA:3.40.50.720		1	153	5.8e-35	T	IPR016040	NAD(P)-binding domain
Vas2_607_GH109	385	Pfam	PF02894	Oxidoreductase family, C-terminal alpha/beta domain	146	267	1e-08	T	IPR004104	Oxidoreductase, C-terminal	GO:0008152|GO:0016491|GO:0055114
Vas2_607_GH109	385	Pfam	PF01408	Oxidoreductase family, NAD-binding Rossmann fold	5	127	9.2e-19	T	IPR000683	Oxidoreductase, N-terminal	GO:0016491
Vas2_607_GH109	385	PANTHER	PTHR43708:SF5		3	383	2.4e-115	T
Vas2_607_GH109	385	SUPERFAMILY	SSF55347		140	318	5.23e-39	T
Vas2_607_GH109	385	Gene3D	G3DSA:3.30.360.10		154	276	4.3e-38	T
Vas2_607_GH109	385	Gene3D	G3DSA:3.30.360.10		322	384	4.3e-38	T
Vas2_61_GH10	531	Pfam	PF00331	Glycosyl hydrolase family 10	44	362	1.2e-103	T	IPR001000	Glycoside hydrolase family 10 domain	GO:0004553|GO:0005975	MetaCyc: PWY-6784
Vas2_61_GH10	531	ProSiteProfiles	PS51257	Prokaryotic membrane lipoprotein lipid attachment site profile.	1	19	5	T
Vas2_61_GH10	531	PRINTS	PR00134	Glycosyl hydrolase family 10 signature	236	248	2.9e-17	T	IPR001000	Glycoside hydrolase family 10 domain	GO:0004553|GO:0005975	MetaCyc: PWY-6784
Vas2_61_GH10	531	PRINTS	PR00134	Glycosyl hydrolase family 10 signature	115	127	2.9e-17	T	IPR001000	Glycoside hydrolase family 10 domain	GO:0004553|GO:0005975	MetaCyc: PWY-6784
Vas2_61_GH10	531	PRINTS	PR00134	Glycosyl hydrolase family 10 signature	158	169	2.9e-17	T	IPR001000	Glycoside hydrolase family 10 domain	GO:0004553|GO:0005975	MetaCyc: PWY-6784
Vas2_61_GH10	531	PRINTS	PR00134	Glycosyl hydrolase family 10 signature	207	218	2.9e-17	T	IPR001000	Glycoside hydrolase family 10 domain	GO:0004553|GO:0005975	MetaCyc: PWY-6784
Vas2_61_GH10	531	Gene3D	G3DSA:3.20.20.80		42	366	1e-107	T	IPR013781	Glycoside hydrolase, catalytic domain	GO:0005975
Vas2_61_GH10	531	SMART	SM00633		84	364	5.9e-99	T	IPR001000	Glycoside hydrolase family 10 domain	GO:0004553|GO:0005975	MetaCyc: PWY-6784
Vas2_61_GH10	531	ProSiteProfiles	PS51760	Glycosyl hydrolases family 10 (GH10) domain profile.	49	363	60.505	T	IPR001000	Glycoside hydrolase family 10 domain	GO:0004553|GO:0005975	MetaCyc: PWY-6784
Vas2_61_GH10	531	PANTHER	PTHR31490		42	372	5.8e-79	T
Vas2_61_GH10	531	SignalP_GRAM_POSITIVE	SignalP-TM		1	24	-	T
Vas2_61_GH10	531	SignalP_EUK	SignalP-noTM		1	26	-	T
Vas2_61_GH10	531	SUPERFAMILY	SSF51445		40	367	8.87e-100	T	IPR017853	Glycoside hydrolase superfamily
Vas2_61_GH10	531	Gene3D	G3DSA:2.60.120.260		376	486	6.5e-05	T	IPR008979	Galactose-binding domain-like
Vas2_67_GH10	748	ProSiteProfiles	PS51760	Glycosyl hydrolases family 10 (GH10) domain profile.	44	351	71.964	T	IPR001000	Glycoside hydrolase family 10 domain	GO:0004553|GO:0005975	MetaCyc: PWY-6784
Vas2_67_GH10	748	SUPERFAMILY	SSF51445		49	358	4.53e-108	T	IPR017853	Glycoside hydrolase superfamily
Vas2_67_GH10	748	SignalP_GRAM_NEGATIVE	SignalP-noTM		1	23	-	T
Vas2_67_GH10	748	Pfam	PF00331	Glycosyl hydrolase family 10	42	349	4.2e-104	T	IPR001000	Glycoside hydrolase family 10 domain	GO:0004553|GO:0005975	MetaCyc: PWY-6784
Vas2_67_GH10	748	PANTHER	PTHR31490		47	383	7.3e-90	T
Vas2_67_GH10	748	Gene3D	G3DSA:3.20.20.80		45	352	1.7e-107	T	IPR013781	Glycoside hydrolase, catalytic domain	GO:0005975
Vas2_67_GH10	748	PRINTS	PR00134	Glycosyl hydrolase family 10 signature	202	213	1.2e-13	T	IPR001000	Glycoside hydrolase family 10 domain	GO:0004553|GO:0005975	MetaCyc: PWY-6784
Vas2_67_GH10	748	PRINTS	PR00134	Glycosyl hydrolase family 10 signature	231	243	1.2e-13	T	IPR001000	Glycoside hydrolase family 10 domain	GO:0004553|GO:0005975	MetaCyc: PWY-6784
Vas2_67_GH10	748	PRINTS	PR00134	Glycosyl hydrolase family 10 signature	158	169	1.2e-13	T	IPR001000	Glycoside hydrolase family 10 domain	GO:0004553|GO:0005975	MetaCyc: PWY-6784
Vas2_67_GH10	748	PRINTS	PR00134	Glycosyl hydrolase family 10 signature	114	126	1.2e-13	T	IPR001000	Glycoside hydrolase family 10 domain	GO:0004553|GO:0005975	MetaCyc: PWY-6784
Vas2_67_GH10	748	SMART	SM00633		83	352	4.5e-109	T	IPR001000	Glycoside hydrolase family 10 domain	GO:0004553|GO:0005975	MetaCyc: PWY-6784
Vas2_67_GH10	748	SUPERFAMILY	SSF49344		416	545	2.59e-05	T
Vas2_67_GH10	748	SignalP_GRAM_POSITIVE	SignalP-TM		1	29	-	T
Vas2_67_GH10	748	ProSiteProfiles	PS51257	Prokaryotic membrane lipoprotein lipid attachment site profile.	1	17	6	T
Vas2_67_GH10	748	SignalP_EUK	SignalP-noTM		1	21	-	T
Vas2_71_GH36	704	PIRSF	PIRSF005536		2	704	6.4e-227	T	IPR002252	Glycoside hydrolase family 36	GO:0004557|GO:0005975	KEGG: 00052+3.2.1.22|KEGG: 00561+3.2.1.22|KEGG: 00600+3.2.1.22|KEGG: 00603+3.2.1.22|MetaCyc: PWY-6527
Vas2_71_GH36	704	CDD	cd14791	GH36	295	588	1.21379e-124	T
Vas2_71_GH36	704	Pfam	PF02065	Melibiase	257	595	3.3e-117	T	IPR002252	Glycoside hydrolase family 36	GO:0004557|GO:0005975	KEGG: 00052+3.2.1.22|KEGG: 00561+3.2.1.22|KEGG: 00600+3.2.1.22|KEGG: 00603+3.2.1.22|MetaCyc: PWY-6527
Vas2_71_GH36	704	Pfam	PF16875	Glycosyl hydrolase family 36 N-terminal domain	26	248	9.9e-50	T	IPR031704	Glycosyl hydrolase family 36, N-terminal		KEGG: 00052+3.2.1.22|KEGG: 00561+3.2.1.22|KEGG: 00600+3.2.1.22|KEGG: 00603+3.2.1.22|MetaCyc: PWY-6527
Vas2_71_GH36	704	PRINTS	PR00743	Glycosyl hydrolase family 36 signature	481	497	1.9e-53	T	IPR002252	Glycoside hydrolase family 36	GO:0004557|GO:0005975	KEGG: 00052+3.2.1.22|KEGG: 00561+3.2.1.22|KEGG: 00600+3.2.1.22|KEGG: 00603+3.2.1.22|MetaCyc: PWY-6527
Vas2_71_GH36	704	PRINTS	PR00743	Glycosyl hydrolase family 36 signature	375	397	1.9e-53	T	IPR002252	Glycoside hydrolase family 36	GO:0004557|GO:0005975	KEGG: 00052+3.2.1.22|KEGG: 00561+3.2.1.22|KEGG: 00600+3.2.1.22|KEGG: 00603+3.2.1.22|MetaCyc: PWY-6527
Vas2_71_GH36	704	PRINTS	PR00743	Glycosyl hydrolase family 36 signature	260	280	1.9e-53	T	IPR002252	Glycoside hydrolase family 36	GO:0004557|GO:0005975	KEGG: 00052+3.2.1.22|KEGG: 00561+3.2.1.22|KEGG: 00600+3.2.1.22|KEGG: 00603+3.2.1.22|MetaCyc: PWY-6527
Vas2_71_GH36	704	PRINTS	PR00743	Glycosyl hydrolase family 36 signature	506	522	1.9e-53	T	IPR002252	Glycoside hydrolase family 36	GO:0004557|GO:0005975	KEGG: 00052+3.2.1.22|KEGG: 00561+3.2.1.22|KEGG: 00600+3.2.1.22|KEGG: 00603+3.2.1.22|MetaCyc: PWY-6527
Vas2_71_GH36	704	PRINTS	PR00743	Glycosyl hydrolase family 36 signature	209	224	1.9e-53	T	IPR002252	Glycoside hydrolase family 36	GO:0004557|GO:0005975	KEGG: 00052+3.2.1.22|KEGG: 00561+3.2.1.22|KEGG: 00600+3.2.1.22|KEGG: 00603+3.2.1.22|MetaCyc: PWY-6527
Vas2_71_GH36	704	PRINTS	PR00743	Glycosyl hydrolase family 36 signature	325	340	1.9e-53	T	IPR002252	Glycoside hydrolase family 36	GO:0004557|GO:0005975	KEGG: 00052+3.2.1.22|KEGG: 00561+3.2.1.22|KEGG: 00600+3.2.1.22|KEGG: 00603+3.2.1.22|MetaCyc: PWY-6527
Vas2_71_GH36	704	PRINTS	PR00743	Glycosyl hydrolase family 36 signature	297	311	1.9e-53	T	IPR002252	Glycoside hydrolase family 36	GO:0004557|GO:0005975	KEGG: 00052+3.2.1.22|KEGG: 00561+3.2.1.22|KEGG: 00600+3.2.1.22|KEGG: 00603+3.2.1.22|MetaCyc: PWY-6527
Vas2_71_GH36	704	PRINTS	PR00743	Glycosyl hydrolase family 36 signature	433	448	1.9e-53	T	IPR002252	Glycoside hydrolase family 36	GO:0004557|GO:0005975	KEGG: 00052+3.2.1.22|KEGG: 00561+3.2.1.22|KEGG: 00600+3.2.1.22|KEGG: 00603+3.2.1.22|MetaCyc: PWY-6527
Vas2_71_GH36	704	SUPERFAMILY	SSF51445		293	617	3.51e-101	T	IPR017853	Glycoside hydrolase superfamily
Vas2_71_GH36	704	ProSitePatterns	PS00512	Alpha-galactosidase signature.	326	341	-	T	IPR000111	Glycoside hydrolase family 27/36, conserved site	GO:0004553|GO:0005975	KEGG: 00052+3.2.1.22|KEGG: 00561+3.2.1.22|KEGG: 00600+3.2.1.22|KEGG: 00603+3.2.1.22|MetaCyc: PWY-6527
Vas2_71_GH36	704	PANTHER	PTHR43053		5	685	1.7e-118	T
Vas2_71_GH36	704	PANTHER	PTHR43053:SF6		5	685	1.7e-118	T
Vas2_71_GH36	704	Gene3D	G3DSA:3.20.20.70		292	579	4.4e-43	T	IPR013785	Aldolase-type TIM barrel	GO:0003824
Vas2_739_GH43	572	Gene3D	G3DSA:2.60.120.200		350	556	2e-23	T	IPR013320	Concanavalin A-like lectin/glucanase domain
Vas2_739_GH43	572	Gene3D	G3DSA:2.115.10.20		23	324	1.8e-56	T	IPR023296	Glycosyl hydrolase, five-bladed beta-propellor domain
Vas2_739_GH43	572	PANTHER	PTHR42812:SF2		22	556	8.4e-115	T
Vas2_739_GH43	572	Pfam	PF04616	Glycosyl hydrolases family 43	24	319	2.4e-49	T	IPR006710	Glycoside hydrolase, family 43	GO:0004553|GO:0005975
Vas2_739_GH43	572	SUPERFAMILY	SSF49899		350	555	3.68e-23	T	IPR013320	Concanavalin A-like lectin/glucanase domain
Vas2_739_GH43	572	SUPERFAMILY	SSF75005		24	323	2.43e-60	T	IPR023296	Glycosyl hydrolase, five-bladed beta-propellor domain
Vas2_739_GH43	572	PANTHER	PTHR42812		22	556	8.4e-115	T
Vas2_741_GH88	396	SUPERFAMILY	SSF48208		18	396	9.28e-82	T	IPR008928	Six-hairpin glycosidase-like	GO:0003824
Vas2_741_GH88	396	PANTHER	PTHR36845		45	391	1.1e-88	T
Vas2_741_GH88	396	Pfam	PF07470	Glycosyl Hydrolase Family 88	46	387	6.7e-19	T	IPR010905	Glycosyl hydrolase, family 88
Vas2_741_GH88	396	Gene3D	G3DSA:1.50.10.10		18	394	1.8e-104	T	IPR012341	Six-hairpin glycosidase	GO:0003824
Vas2_758_GH88	389	PANTHER	PTHR36845		7	373	4.6e-95	T
Vas2_758_GH88	389	Gene3D	G3DSA:1.50.10.10		7	372	1.3e-121	T	IPR012341	Six-hairpin glycosidase	GO:0003824
Vas2_758_GH88	389	SUPERFAMILY	SSF48208		8	373	6.8e-92	T	IPR008928	Six-hairpin glycosidase-like	GO:0003824
Vas2_758_GH88	389	Pfam	PF07470	Glycosyl Hydrolase Family 88	34	322	1.7e-15	T	IPR010905	Glycosyl hydrolase, family 88
Vas2_764_GH43	555	Gene3D	G3DSA:2.115.10.20		16	317	2.4e-52	T	IPR023296	Glycosyl hydrolase, five-bladed beta-propellor domain
Vas2_764_GH43	555	PANTHER	PTHR42812		15	549	2.3e-110	T
Vas2_764_GH43	555	SUPERFAMILY	SSF49899		346	549	1.98e-27	T	IPR013320	Concanavalin A-like lectin/glucanase domain
Vas2_764_GH43	555	Gene3D	G3DSA:2.60.120.200		345	549	3.1e-26	T	IPR013320	Concanavalin A-like lectin/glucanase domain
Vas2_764_GH43	555	SUPERFAMILY	SSF75005		17	317	5e-57	T	IPR023296	Glycosyl hydrolase, five-bladed beta-propellor domain
Vas2_764_GH43	555	Pfam	PF04616	Glycosyl hydrolases family 43	18	312	5.4e-45	T	IPR006710	Glycoside hydrolase, family 43	GO:0004553|GO:0005975
Vas2_764_GH43	555	PANTHER	PTHR42812:SF2		15	549	2.3e-110	T
Vas2_765_GH78	889	PIRSF	PIRSF010631		9	885	2.2e-240	T	IPR016007	Alpha-L-rhamnosidase
Vas2_765_GH78	889	SUPERFAMILY	SSF48208		428	879	8.16e-44	T	IPR008928	Six-hairpin glycosidase-like	GO:0003824
Vas2_765_GH78	889	Pfam	PF05592	Bacterial alpha-L-rhamnosidase	323	848	1.3e-169	T	IPR008902	Bacterial alpha-L-rhamnosidase
Vas2_765_GH78	889	PANTHER	PTHR33307		23	879	4e-220	T
Vas2_765_GH78	889	Pfam	PF08531	Alpha-L-rhamnosidase N-terminal domain	147	313	4.4e-43	T	IPR013737	Bacterial alpha-L-rhamnosidase N-terminal
Vas2_765_GH78	889	Gene3D	G3DSA:2.60.120.260		314	427	1.2e-19	T	IPR008979	Galactose-binding domain-like
Vas2_768_GH88	388	PANTHER	PTHR36845		40	385	4.1e-100	T
Vas2_768_GH88	388	Gene3D	G3DSA:1.50.10.10		21	388	1e-130	T	IPR012341	Six-hairpin glycosidase	GO:0003824
Vas2_768_GH88	388	Pfam	PF07470	Glycosyl Hydrolase Family 88	57	379	1.6e-40	T	IPR010905	Glycosyl hydrolase, family 88
Vas2_768_GH88	388	SUPERFAMILY	SSF48208		21	388	1.98e-108	T	IPR008928	Six-hairpin glycosidase-like	GO:0003824
Vas2_771_GH88	377	PANTHER	PTHR36845		37	373	7.6e-95	T
Vas2_771_GH88	377	SUPERFAMILY	SSF48208		8	372	4.59e-90	T	IPR008928	Six-hairpin glycosidase-like	GO:0003824
Vas2_771_GH88	377	Gene3D	G3DSA:1.50.10.10		7	373	6.2e-120	T	IPR012341	Six-hairpin glycosidase	GO:0003824
Vas2_771_GH88	377	PANTHER	PTHR36845:SF2		37	373	7.6e-95	T
Vas2_771_GH88	377	Pfam	PF07470	Glycosyl Hydrolase Family 88	40	312	6e-13	T	IPR010905	Glycosyl hydrolase, family 88
Vas2_79_GH43	349	PANTHER	PTHR43772		33	345	8.2e-136	T
Vas2_79_GH43	349	MobiDBLite	mobidb-lite	consensus disorder prediction	1	25	-	T
Vas2_79_GH43	349	Gene3D	G3DSA:2.115.10.20		30	341	4.6e-70	T	IPR023296	Glycosyl hydrolase, five-bladed beta-propellor domain
Vas2_79_GH43	349	CDD	cd08990	GH43_AXH_like	42	343	1.30864e-131	T
Vas2_79_GH43	349	Pfam	PF04616	Glycosyl hydrolases family 43	95	340	5.4e-28	T	IPR006710	Glycoside hydrolase, family 43	GO:0004553|GO:0005975
Vas2_79_GH43	349	SUPERFAMILY	SSF75005		26	341	6.15e-58	T	IPR023296	Glycosyl hydrolase, five-bladed beta-propellor domain
Vas2_79_GH43	349	PANTHER	PTHR43772:SF1		33	345	8.2e-136	T
Vas2_80_GH43	537	CDD	cd09000	GH43_XYL_1	7	309	7.25158e-161	T
Vas2_80_GH43	537	SUPERFAMILY	SSF49899		329	535	7.91e-61	T	IPR013320	Concanavalin A-like lectin/glucanase domain
Vas2_80_GH43	537	SUPERFAMILY	SSF75005		5	322	2e-97	T	IPR023296	Glycosyl hydrolase, five-bladed beta-propellor domain
Vas2_80_GH43	537	Gene3D	G3DSA:2.115.10.20		4	321	6.8e-100	T	IPR023296	Glycosyl hydrolase, five-bladed beta-propellor domain
Vas2_80_GH43	537	PANTHER	PTHR42812		4	534	2.1e-138	T
Vas2_80_GH43	537	Gene3D	G3DSA:2.60.120.200		333	536	1.5e-61	T	IPR013320	Concanavalin A-like lectin/glucanase domain
Vas2_80_GH43	537	PANTHER	PTHR42812:SF1		4	534	2.1e-138	T
Vas2_80_GH43	537	Pfam	PF04616	Glycosyl hydrolases family 43	5	307	5.2e-99	T	IPR006710	Glycoside hydrolase, family 43	GO:0004553|GO:0005975
Vas2_84_GH3	785	Gene3D	G3DSA:3.20.20.300		2	367	1.2e-103	T	IPR001764	Glycoside hydrolase, family 3, N-terminal	GO:0004553|GO:0005975
Vas2_84_GH3	785	Pfam	PF00933	Glycosyl hydrolase family 3 N terminal domain	23	353	1.1e-71	T	IPR001764	Glycoside hydrolase, family 3, N-terminal	GO:0004553|GO:0005975
Vas2_84_GH3	785	PRINTS	PR00133	Glycosyl hydrolase family 3 signature	124	143	2.6e-21	T	IPR001764	Glycoside hydrolase, family 3, N-terminal	GO:0004553|GO:0005975
Vas2_84_GH3	785	PRINTS	PR00133	Glycosyl hydrolase family 3 signature	170	186	2.6e-21	T	IPR001764	Glycoside hydrolase, family 3, N-terminal	GO:0004553|GO:0005975
Vas2_84_GH3	785	PRINTS	PR00133	Glycosyl hydrolase family 3 signature	274	292	2.6e-21	T	IPR001764	Glycoside hydrolase, family 3, N-terminal	GO:0004553|GO:0005975
Vas2_84_GH3	785	PRINTS	PR00133	Glycosyl hydrolase family 3 signature	203	219	2.6e-21	T	IPR001764	Glycoside hydrolase, family 3, N-terminal	GO:0004553|GO:0005975
Vas2_84_GH3	785	PRINTS	PR00133	Glycosyl hydrolase family 3 signature	101	117	2.6e-21	T	IPR001764	Glycoside hydrolase, family 3, N-terminal	GO:0004553|GO:0005975
Vas2_84_GH3	785	PANTHER	PTHR30620		3	770	6.8e-245	T
Vas2_84_GH3	785	Gene3D	G3DSA:3.40.50.1700		377	469	6.5e-62	T	IPR002772	Glycoside hydrolase family 3 C-terminal domain	GO:0004553|GO:0005975
Vas2_84_GH3	785	Gene3D	G3DSA:3.40.50.1700		501	651	6.5e-62	T	IPR002772	Glycoside hydrolase family 3 C-terminal domain	GO:0004553|GO:0005975
Vas2_84_GH3	785	SUPERFAMILY	SSF51445		2	389	7.58e-95	T	IPR017853	Glycoside hydrolase superfamily
Vas2_84_GH3	785	SMART	SM01217		685	754	9e-32	T	IPR026891	Fibronectin type III-like domain
Vas2_84_GH3	785	PANTHER	PTHR30620:SF67		3	770	6.8e-245	T
Vas2_84_GH3	785	Pfam	PF01915	Glycosyl hydrolase family 3 C-terminal domain	390	648	6.5e-51	T	IPR002772	Glycoside hydrolase family 3 C-terminal domain	GO:0004553|GO:0005975
Vas2_84_GH3	785	Pfam	PF14310	Fibronectin type III-like domain	685	754	4.2e-21	T	IPR026891	Fibronectin type III-like domain
Vas2_84_GH3	785	SUPERFAMILY	SSF52279		390	467	1.29e-46	T	IPR002772	Glycoside hydrolase family 3 C-terminal domain	GO:0004553|GO:0005975
Vas2_84_GH3	785	SUPERFAMILY	SSF52279		501	651	1.29e-46	T	IPR002772	Glycoside hydrolase family 3 C-terminal domain	GO:0004553|GO:0005975
Vas2_844_GH109	329	Gene3D	G3DSA:3.30.360.10		133	327	8.5e-55	T
Vas2_844_GH109	329	Gene3D	G3DSA:3.40.50.720		1	132	1.6e-35	T	IPR016040	NAD(P)-binding domain
Vas2_844_GH109	329	PANTHER	PTHR42840:SF5		3	327	3.5e-95	T
Vas2_844_GH109	329	TIGRFAM	TIGR04380	myo_inos_iolG: inositol 2-dehydrogenase	1	326	1.5e-129	T	IPR030827	Inositol 2-dehydrogenase
Vas2_844_GH109	329	PANTHER	PTHR42840		3	327	3.5e-95	T
Vas2_844_GH109	329	Pfam	PF01408	Oxidoreductase family, NAD-binding Rossmann fold	2	116	2.2e-18	T	IPR000683	Oxidoreductase, N-terminal	GO:0016491
Vas2_844_GH109	329	SUPERFAMILY	SSF55347		125	288	5.89e-38	T
Vas2_844_GH109	329	Pfam	PF02894	Oxidoreductase family, C-terminal alpha/beta domain	132	238	1.7e-13	T	IPR004104	Oxidoreductase, C-terminal	GO:0008152|GO:0016491|GO:0055114
Vas2_844_GH109	329	SUPERFAMILY	SSF51735		2	146	4.25e-39	T	IPR016040	NAD(P)-binding domain
Vas2_850_GH109	391	SUPERFAMILY	SSF51735		9	173	3.78e-40	T	IPR016040	NAD(P)-binding domain
Vas2_850_GH109	391	PANTHER	PTHR43708:SF5		2	391	1.4e-147	T
Vas2_850_GH109	391	Pfam	PF02894	Oxidoreductase family, C-terminal alpha/beta domain	154	276	3.8e-13	T	IPR004104	Oxidoreductase, C-terminal	GO:0008152|GO:0016491|GO:0055114
Vas2_850_GH109	391	Gene3D	G3DSA:3.30.360.10		336	385	5.3e-33	T
Vas2_850_GH109	391	Gene3D	G3DSA:3.30.360.10		162	284	5.3e-33	T
Vas2_850_GH109	391	Gene3D	G3DSA:3.40.50.720		9	161	2.6e-41	T	IPR016040	NAD(P)-binding domain
Vas2_850_GH109	391	PANTHER	PTHR43708		2	391	1.4e-147	T
Vas2_850_GH109	391	Pfam	PF01408	Oxidoreductase family, NAD-binding Rossmann fold	12	142	2.6e-26	T	IPR000683	Oxidoreductase, N-terminal	GO:0016491
Vas2_850_GH109	391	SUPERFAMILY	SSF55347		148	319	1.14e-32	T
Vas2_929_GH127	627	SUPERFAMILY	SSF48208		55	355	2.72e-25	T	IPR008928	Six-hairpin glycosidase-like	GO:0003824
Vas2_929_GH127	627	PANTHER	PTHR43465		3	625	1.3e-165	T
Vas2_929_GH127	627	Pfam	PF07944	Beta-L-arabinofuranosidase, GH127	11	538	7.4e-118	T	IPR012878	Beta-L-arabinofuranosidase, GH127		KEGG: 00511+3.2.1.18|KEGG: 00600+3.2.1.18
Vas2_929_GH127	627	MobiDBLite	mobidb-lite	consensus disorder prediction	216	235	-	T
Vas2_929_GH127	627	Gene3D	G3DSA:1.50.10.10		80	275	2.2e-09	T	IPR012341	Six-hairpin glycosidase	GO:0003824
Vas2_433	12076	MobiDBLite	mobidb-lite	consensus disorder prediction	1	65	-	T
Vas2_433	12076	Pfam	PF17892	Cadherin-like domain	1080	1173	2.3e-24	T	IPR041690	Cadherin-like domain
Vas2_433	12076	Pfam	PF17892	Cadherin-like domain	11378	11466	2.4e-16	T	IPR041690	Cadherin-like domain
Vas2_433	12076	Pfam	PF17892	Cadherin-like domain	7872	7967	2.1e-23	T	IPR041690	Cadherin-like domain
Vas2_433	12076	Pfam	PF17892	Cadherin-like domain	6439	6532	5.4e-23	T	IPR041690	Cadherin-like domain
Vas2_433	12076	Pfam	PF17892	Cadherin-like domain	1368	1462	2.7e-22	T	IPR041690	Cadherin-like domain
Vas2_433	12076	Pfam	PF17892	Cadherin-like domain	3091	3185	1.7e-22	T	IPR041690	Cadherin-like domain
Vas2_433	12076	Pfam	PF17892	Cadherin-like domain	1753	1845	3.8e-22	T	IPR041690	Cadherin-like domain
Vas2_433	12076	Pfam	PF17892	Cadherin-like domain	4908	5001	3.3e-24	T	IPR041690	Cadherin-like domain
Vas2_433	12076	Pfam	PF17892	Cadherin-like domain	9638	9732	2.7e-22	T	IPR041690	Cadherin-like domain
Vas2_433	12076	Pfam	PF17892	Cadherin-like domain	506	599	1.3e-23	T	IPR041690	Cadherin-like domain
Vas2_433	12076	Pfam	PF17892	Cadherin-like domain	220	312	1.8e-23	T	IPR041690	Cadherin-like domain
Vas2_433	12076	Pfam	PF17892	Cadherin-like domain	2326	2420	1e-22	T	IPR041690	Cadherin-like domain
Vas2_433	12076	Pfam	PF17892	Cadherin-like domain	6151	6245	2e-23	T	IPR041690	Cadherin-like domain
Vas2_433	12076	Pfam	PF17892	Cadherin-like domain	4335	4428	1.8e-24	T	IPR041690	Cadherin-like domain
Vas2_433	12076	Pfam	PF17892	Cadherin-like domain	5099	5192	1.3e-23	T	IPR041690	Cadherin-like domain
Vas2_433	12076	Pfam	PF17892	Cadherin-like domain	3953	4046	4.2e-24	T	IPR041690	Cadherin-like domain
Vas2_433	12076	Pfam	PF17892	Cadherin-like domain	5196	5288	7.1e-22	T	IPR041690	Cadherin-like domain
Vas2_433	12076	Pfam	PF17892	Cadherin-like domain	5387	5479	5.3e-22	T	IPR041690	Cadherin-like domain
Vas2_433	12076	Pfam	PF17892	Cadherin-like domain	10406	10499	5.5e-23	T	IPR041690	Cadherin-like domain
Vas2_433	12076	Pfam	PF17892	Cadherin-like domain	5672	5765	2.2e-24	T	IPR041690	Cadherin-like domain
Vas2_433	12076	Pfam	PF17892	Cadherin-like domain	412	504	3.2e-22	T	IPR041690	Cadherin-like domain
Vas2_433	12076	Pfam	PF17892	Cadherin-like domain	10022	10116	2.4e-22	T	IPR041690	Cadherin-like domain
Vas2_433	12076	Pfam	PF17892	Cadherin-like domain	2901	2993	7.1e-22	T	IPR041690	Cadherin-like domain
Vas2_433	12076	Pfam	PF17892	Cadherin-like domain	984	1078	2.1e-23	T	IPR041690	Cadherin-like domain
Vas2_433	12076	Pfam	PF17892	Cadherin-like domain	11183	11278	2.4e-25	T	IPR041690	Cadherin-like domain
Vas2_433	12076	Pfam	PF17892	Cadherin-like domain	3475	3569	2.7e-22	T	IPR041690	Cadherin-like domain
Vas2_433	12076	Pfam	PF17892	Cadherin-like domain	7205	7299	3.7e-23	T	IPR041690	Cadherin-like domain
Vas2_433	12076	Pfam	PF17892	Cadherin-like domain	315	408	1.6e-24	T	IPR041690	Cadherin-like domain
Vas2_433	12076	Pfam	PF17892	Cadherin-like domain	8966	9059	1.8e-24	T	IPR041690	Cadherin-like domain
Vas2_433	12076	Pfam	PF17892	Cadherin-like domain	697	790	1.9e-24	T	IPR041690	Cadherin-like domain
Vas2_433	12076	Pfam	PF17892	Cadherin-like domain	7595	7663	5.8e-19	T	IPR041690	Cadherin-like domain
Vas2_433	12076	Pfam	PF17892	Cadherin-like domain	10214	10307	6.1e-20	T	IPR041690	Cadherin-like domain
Vas2_433	12076	Pfam	PF17892	Cadherin-like domain	10310	10403	5.1e-18	T	IPR041690	Cadherin-like domain
Vas2_433	12076	Pfam	PF17892	Cadherin-like domain	10501	10594	2.6e-24	T	IPR041690	Cadherin-like domain
Vas2_433	12076	Pfam	PF17892	Cadherin-like domain	1943	2036	1.3e-21	T	IPR041690	Cadherin-like domain
Vas2_433	12076	Pfam	PF17892	Cadherin-like domain	6247	6340	1.2e-23	T	IPR041690	Cadherin-like domain
Vas2_433	12076	Pfam	PF17892	Cadherin-like domain	7110	7203	1.7e-24	T	IPR041690	Cadherin-like domain
Vas2_433	12076	Pfam	PF17892	Cadherin-like domain	10885	10945	7.7e-09	T	IPR041690	Cadherin-like domain
Vas2_433	12076	Pfam	PF17892	Cadherin-like domain	5290	5383	2.9e-24	T	IPR041690	Cadherin-like domain
Vas2_433	12076	Pfam	PF17892	Cadherin-like domain	3571	3664	6.7e-24	T	IPR041690	Cadherin-like domain
Vas2_433	12076	Pfam	PF17892	Cadherin-like domain	4526	4619	2.7e-23	T	IPR041690	Cadherin-like domain
Vas2_433	12076	Pfam	PF17892	Cadherin-like domain	4050	4142	3.8e-22	T	IPR041690	Cadherin-like domain
Vas2_433	12076	Pfam	PF17892	Cadherin-like domain	2519	2611	7.8e-22	T	IPR041690	Cadherin-like domain
Vas2_433	12076	Pfam	PF17892	Cadherin-like domain	888	981	8.1e-24	T	IPR041690	Cadherin-like domain
Vas2_433	12076	Pfam	PF17892	Cadherin-like domain	3762	3855	2.7e-23	T	IPR041690	Cadherin-like domain
Vas2_433	12076	Pfam	PF17892	Cadherin-like domain	8585	8677	2.3e-24	T	IPR041690	Cadherin-like domain
Vas2_433	12076	Pfam	PF17892	Cadherin-like domain	4241	4333	5.3e-22	T	IPR041690	Cadherin-like domain
Vas2_433	12076	Pfam	PF17892	Cadherin-like domain	4814	4906	5.3e-22	T	IPR041690	Cadherin-like domain
Vas2_433	12076	Pfam	PF17892	Cadherin-like domain	10118	10211	6.3e-24	T	IPR041690	Cadherin-like domain
Vas2_433	12076	Pfam	PF17892	Cadherin-like domain	3859	3951	7.1e-22	T	IPR041690	Cadherin-like domain
Vas2_433	12076	Pfam	PF17892	Cadherin-like domain	2804	2897	2.9e-24	T	IPR041690	Cadherin-like domain
Vas2_433	12076	Pfam	PF17892	Cadherin-like domain	9446	9540	8.8e-23	T	IPR041690	Cadherin-like domain
Vas2_433	12076	Pfam	PF17892	Cadherin-like domain	7969	8062	2.2e-17	T	IPR041690	Cadherin-like domain
Vas2_433	12076	Pfam	PF17892	Cadherin-like domain	9350	9443	2e-24	T	IPR041690	Cadherin-like domain
Vas2_433	12076	Pfam	PF17892	Cadherin-like domain	8679	8772	2.5e-24	T	IPR041690	Cadherin-like domain
Vas2_433	12076	Pfam	PF17892	Cadherin-like domain	9254	9348	1.9e-21	T	IPR041690	Cadherin-like domain
Vas2_433	12076	Pfam	PF17892	Cadherin-like domain	5769	5861	5.3e-22	T	IPR041690	Cadherin-like domain
Vas2_433	12076	Pfam	PF17892	Cadherin-like domain	5863	5956	1.2e-23	T	IPR041690	Cadherin-like domain
Vas2_433	12076	Pfam	PF17892	Cadherin-like domain	1656	1749	1.5e-23	T	IPR041690	Cadherin-like domain
Vas2_433	12076	Pfam	PF17892	Cadherin-like domain	2613	2706	4e-24	T	IPR041690	Cadherin-like domain
Vas2_433	12076	Pfam	PF17892	Cadherin-like domain	10693	10786	4e-19	T	IPR041690	Cadherin-like domain
Vas2_433	12076	Pfam	PF17892	Cadherin-like domain	2995	3088	1.3e-24	T	IPR041690	Cadherin-like domain
Vas2_433	12076	Pfam	PF17892	Cadherin-like domain	3187	3280	2.8e-23	T	IPR041690	Cadherin-like domain
Vas2_433	12076	Pfam	PF17892	Cadherin-like domain	7014	7107	2.4e-23	T	IPR041690	Cadherin-like domain
Vas2_433	12076	Pfam	PF17892	Cadherin-like domain	1560	1654	2.7e-22	T	IPR041690	Cadherin-like domain
Vas2_433	12076	Pfam	PF17892	Cadherin-like domain	2135	2228	9e-23	T	IPR041690	Cadherin-like domain
Vas2_433	12076	Pfam	PF17892	Cadherin-like domain	4623	4715	7.1e-22	T	IPR041690	Cadherin-like domain
Vas2_433	12076	Pfam	PF17892	Cadherin-like domain	1176	1268	5.9e-22	T	IPR041690	Cadherin-like domain
Vas2_433	12076	Pfam	PF17892	Cadherin-like domain	8065	8159	7.3e-24	T	IPR041690	Cadherin-like domain
Vas2_433	12076	Pfam	PF17892	Cadherin-like domain	9062	9156	2.3e-22	T	IPR041690	Cadherin-like domain
Vas2_433	12076	Pfam	PF17892	Cadherin-like domain	5005	5097	5.3e-22	T	IPR041690	Cadherin-like domain
Vas2_433	12076	Pfam	PF17892	Cadherin-like domain	8871	8964	2.6e-23	T	IPR041690	Cadherin-like domain
Vas2_433	12076	Pfam	PF17892	Cadherin-like domain	3283	3376	4.2e-22	T	IPR041690	Cadherin-like domain
Vas2_433	12076	Pfam	PF17892	Cadherin-like domain	5959	6053	2e-23	T	IPR041690	Cadherin-like domain
Vas2_433	12076	Pfam	PF17892	Cadherin-like domain	5578	5670	3.8e-22	T	IPR041690	Cadherin-like domain
Vas2_433	12076	Pfam	PF17892	Cadherin-like domain	1272	1365	4e-23	T	IPR041690	Cadherin-like domain
Vas2_433	12076	Pfam	PF17892	Cadherin-like domain	9926	10019	2.3e-23	T	IPR041690	Cadherin-like domain
Vas2_433	12076	Pfam	PF17892	Cadherin-like domain	11685	11775	1.4e-15	T	IPR041690	Cadherin-like domain
Vas2_433	12076	Pfam	PF17892	Cadherin-like domain	7677	7771	1.7e-27	T	IPR041690	Cadherin-like domain
Vas2_433	12076	Pfam	PF17892	Cadherin-like domain	3668	3760	3.8e-22	T	IPR041690	Cadherin-like domain
Vas2_433	12076	Pfam	PF17892	Cadherin-like domain	9830	9924	2.4e-22	T	IPR041690	Cadherin-like domain
Vas2_433	12076	Pfam	PF17892	Cadherin-like domain	8775	8868	2.1e-17	T	IPR041690	Cadherin-like domain
Vas2_433	12076	Pfam	PF17892	Cadherin-like domain	6822	6915	7.3e-24	T	IPR041690	Cadherin-like domain
Vas2_433	12076	Pfam	PF17892	Cadherin-like domain	1464	1557	2.3e-23	T	IPR041690	Cadherin-like domain
Vas2_433	12076	Pfam	PF17892	Cadherin-like domain	2230	2323	4e-24	T	IPR041690	Cadherin-like domain
Vas2_433	12076	Pfam	PF17892	Cadherin-like domain	2422	2515	3.4e-24	T	IPR041690	Cadherin-like domain
Vas2_433	12076	Pfam	PF17892	Cadherin-like domain	6728	6820	5.2e-22	T	IPR041690	Cadherin-like domain
Vas2_433	12076	Pfam	PF17892	Cadherin-like domain	10790	10882	3.4e-20	T	IPR041690	Cadherin-like domain
Vas2_433	12076	Pfam	PF17892	Cadherin-like domain	6535	6629	4.4e-23	T	IPR041690	Cadherin-like domain
Vas2_433	12076	Pfam	PF17892	Cadherin-like domain	794	886	7.1e-22	T	IPR041690	Cadherin-like domain
Vas2_433	12076	Pfam	PF17892	Cadherin-like domain	7774	7869	1.2e-23	T	IPR041690	Cadherin-like domain
Vas2_433	12076	Pfam	PF17892	Cadherin-like domain	3379	3472	4e-23	T	IPR041690	Cadherin-like domain
Vas2_433	12076	Pfam	PF17892	Cadherin-like domain	2039	2132	2.5e-18	T	IPR041690	Cadherin-like domain
Vas2_433	12076	Pfam	PF17892	Cadherin-like domain	4717	4810	7e-24	T	IPR041690	Cadherin-like domain
Vas2_433	12076	Pfam	PF17892	Cadherin-like domain	1847	1940	1.1e-25	T	IPR041690	Cadherin-like domain
Vas2_433	12076	Pfam	PF17892	Cadherin-like domain	10597	10690	3.5e-21	T	IPR041690	Cadherin-like domain
Vas2_433	12076	Pfam	PF17892	Cadherin-like domain	9734	9827	1.7e-22	T	IPR041690	Cadherin-like domain
Vas2_433	12076	Pfam	PF17892	Cadherin-like domain	603	695	1.2e-20	T	IPR041690	Cadherin-like domain
Vas2_433	12076	Pfam	PF17892	Cadherin-like domain	2710	2802	5.3e-22	T	IPR041690	Cadherin-like domain
Vas2_433	12076	Pfam	PF17892	Cadherin-like domain	11596	11666	1.5e-11	T	IPR041690	Cadherin-like domain
Vas2_433	12076	Pfam	PF17892	Cadherin-like domain	11281	11375	2.1e-13	T	IPR041690	Cadherin-like domain
Vas2_433	12076	Pfam	PF17892	Cadherin-like domain	9542	9635	2.3e-24	T	IPR041690	Cadherin-like domain
Vas2_433	12076	Pfam	PF17892	Cadherin-like domain	6055	6148	2.3e-23	T	IPR041690	Cadherin-like domain
Vas2_433	12076	Pfam	PF17892	Cadherin-like domain	6631	6724	1.9e-23	T	IPR041690	Cadherin-like domain
Vas2_433	12076	Pfam	PF17892	Cadherin-like domain	4432	4524	3.8e-22	T	IPR041690	Cadherin-like domain
Vas2_433	12076	Pfam	PF17892	Cadherin-like domain	8161	8254	3e-25	T	IPR041690	Cadherin-like domain
Vas2_433	12076	Pfam	PF17892	Cadherin-like domain	6343	6437	2e-23	T	IPR041690	Cadherin-like domain
Vas2_433	12076	Pfam	PF17892	Cadherin-like domain	5481	5574	2.9e-24	T	IPR041690	Cadherin-like domain
Vas2_433	12076	Pfam	PF17892	Cadherin-like domain	9158	9251	1.1e-23	T	IPR041690	Cadherin-like domain
Vas2_433	12076	Pfam	PF17892	Cadherin-like domain	4144	4237	2.7e-23	T	IPR041690	Cadherin-like domain
Vas2_433	12076	Pfam	PF17892	Cadherin-like domain	6918	7011	5.4e-18	T	IPR041690	Cadherin-like domain
Vas2_433	12076	MobiDBLite	mobidb-lite	consensus disorder prediction	1	208	-	T
Vas2_433	12076	MobiDBLite	mobidb-lite	consensus disorder prediction	12009	12076	-	T
Vas2_433	12076	SMART	SM00710		6666	6686	4000	T	IPR006626	Parallel beta-helix repeat
Vas2_433	12076	SMART	SM00710		3606	3626	4000	T	IPR006626	Parallel beta-helix repeat
Vas2_433	12076	SMART	SM00710		9961	9981	4000	T	IPR006626	Parallel beta-helix repeat
Vas2_433	12076	SMART	SM00710		1499	1519	4000	T	IPR006626	Parallel beta-helix repeat
Vas2_433	12076	SMART	SM00710		6090	6110	4000	T	IPR006626	Parallel beta-helix repeat
Vas2_433	12076	SMART	SM00710		2648	2668	10000	T	IPR006626	Parallel beta-helix repeat
Vas2_433	12076	SMART	SM00710		5898	5918	3000	T	IPR006626	Parallel beta-helix repeat
Vas2_433	12076	SMART	SM00710		3222	3242	4000	T	IPR006626	Parallel beta-helix repeat
Vas2_433	12076	SMART	SM00710		5516	5536	10000	T	IPR006626	Parallel beta-helix repeat
Vas2_433	12076	SMART	SM00710		9769	9789	4000	T	IPR006626	Parallel beta-helix repeat
Vas2_433	12076	SMART	SM00710		1691	1711	4000	T	IPR006626	Parallel beta-helix repeat
Vas2_433	12076	SMART	SM00710		10153	10173	4000	T	IPR006626	Parallel beta-helix repeat
Vas2_433	12076	SMART	SM00710		6282	6302	4000	T	IPR006626	Parallel beta-helix repeat
Vas2_433	12076	SMART	SM00710		11116	11137	3700	T	IPR006626	Parallel beta-helix repeat
Vas2_433	12076	SMART	SM00710		9193	9213	5400	T	IPR006626	Parallel beta-helix repeat
Vas2_433	12076	SMART	SM00710		923	943	3300	T	IPR006626	Parallel beta-helix repeat
Vas2_433	12076	SMART	SM00710		5325	5345	10000	T	IPR006626	Parallel beta-helix repeat
Vas2_433	12076	SMART	SM00710		8714	8734	5100	T	IPR006626	Parallel beta-helix repeat
Vas2_433	12076	SMART	SM00710		9290	9318	9000	T	IPR006626	Parallel beta-helix repeat
Vas2_433	12076	SMART	SM00710		2839	2859	10000	T	IPR006626	Parallel beta-helix repeat
Vas2_433	12076	SMART	SM00710		6474	6494	4000	T	IPR006626	Parallel beta-helix repeat
Vas2_433	12076	SMART	SM00710		4370	4390	10000	T	IPR006626	Parallel beta-helix repeat
Vas2_433	12076	SMART	SM00710		3414	3434	4000	T	IPR006626	Parallel beta-helix repeat
Vas2_433	12076	SMART	SM00710		541	561	3300	T	IPR006626	Parallel beta-helix repeat
Vas2_433	12076	SMART	SM00710		5134	5154	10000	T	IPR006626	Parallel beta-helix repeat
Vas2_433	12076	SMART	SM00710		1307	1327	4000	T	IPR006626	Parallel beta-helix repeat
Vas2_433	12076	SMART	SM00710		11565	11592	1700	T	IPR006626	Parallel beta-helix repeat
Vas2_433	12076	MobiDBLite	mobidb-lite	consensus disorder prediction	11868	11925	-	T
Vas2_433	12076	Gene3D	G3DSA:2.60.40.2750		505	569	4.5e-07	T
Vas2_433	12076	Gene3D	G3DSA:2.60.40.2750		3188	3250	2.8e-05	T
Vas2_433	12076	Gene3D	G3DSA:2.60.40.2750		4334	4398	2.2e-07	T
Vas2_433	12076	Gene3D	G3DSA:2.60.40.2750		6056	6118	5.5e-05	T
Vas2_433	12076	Gene3D	G3DSA:2.60.40.2750		9158	9221	2.9e-06	T
Vas2_433	12076	Gene3D	G3DSA:2.60.40.2750		5290	5353	1.3e-07	T
Vas2_433	12076	Gene3D	G3DSA:2.60.40.2750		1465	1527	5.5e-05	T
Vas2_433	12076	Gene3D	G3DSA:2.60.40.2750		6440	6502	5.5e-05	T
Vas2_433	12076	Gene3D	G3DSA:2.60.40.2750		4907	4971	2e-06	T
Vas2_433	12076	Gene3D	G3DSA:2.60.40.2750		5480	5544	2e-06	T
Vas2_433	12076	Gene3D	G3DSA:2.60.40.2750		4527	4589	3.6e-07	T
Vas2_433	12076	Gene3D	G3DSA:2.60.40.2750		2994	3058	7.2e-07	T
Vas2_433	12076	Gene3D	G3DSA:2.60.40.2750		1273	1335	2.8e-05	T
Vas2_433	12076	Gene3D	G3DSA:2.60.40.2750		4145	4207	3.6e-07	T
Vas2_433	12076	Gene3D	G3DSA:2.60.40.2750		3763	3825	3.6e-07	T
Vas2_433	12076	Gene3D	G3DSA:2.60.40.2750		9540	9605	9.4e-08	T
Vas2_433	12076	Gene3D	G3DSA:2.60.40.2750		888	951	7.5e-08	T
Vas2_433	12076	Gene3D	G3DSA:2.60.40.2750		5669	5735	6.5e-07	T
Vas2_433	12076	Gene3D	G3DSA:2.60.40.2750		2804	2867	1.3e-07	T
Vas2_433	12076	Gene3D	G3DSA:2.60.40.2750		5862	5926	2.7e-05	T
Vas2_433	12076	Gene3D	G3DSA:2.60.40.2750		2231	2293	4.8e-07	T
Vas2_433	12076	Gene3D	G3DSA:2.60.40.2750		3380	3442	2.8e-05	T
Vas2_433	12076	Gene3D	G3DSA:2.60.40.2750		5098	5162	5e-06	T
Vas2_433	12076	Gene3D	G3DSA:2.60.40.2750		8967	9029	8.7e-07	T
Vas2_433	12076	Gene3D	G3DSA:2.60.40.2750		9927	9989	5.5e-05	T
Vas2_433	12076	Gene3D	G3DSA:2.60.40.2750		6248	6310	5.5e-05	T
Vas2_433	12076	Gene3D	G3DSA:2.60.40.2750		4717	4780	1.3e-07	T
Vas2_433	12076	Gene3D	G3DSA:2.60.40.2750		1079	1143	5.5e-07	T
Vas2_433	12076	Gene3D	G3DSA:2.60.40.2750		9735	9797	5.9e-05	T
Vas2_433	12076	Gene3D	G3DSA:2.60.40.2750		6632	6694	5.5e-05	T
Vas2_433	12076	Gene3D	G3DSA:2.60.40.2750		9351	9413	1.1e-07	T
Vas2_433	12076	Gene3D	G3DSA:2.60.40.2750		3953	4016	1.3e-07	T
Vas2_433	12076	Gene3D	G3DSA:2.60.40.2750		2611	2676	1.2e-07	T
Vas2_433	12076	Gene3D	G3DSA:2.60.40.2750		1657	1719	4.5e-05	T
Vas2_433	12076	Gene3D	G3DSA:2.60.40.2750		2422	2485	1.3e-07	T
Vas2_433	12076	Gene3D	G3DSA:2.60.40.2750		695	760	1.6e-07	T
Vas2_433	12076	MobiDBLite	mobidb-lite	consensus disorder prediction	11868	11890	-	T
Vas2_433	12076	PANTHER	PTHR45739		2301	2557	2.9e-181	T
Vas2_433	12076	PANTHER	PTHR45739		4310	4567	2.9e-181	T
Vas2_433	12076	PANTHER	PTHR45739		6126	6309	2.9e-181	T
Vas2_433	12076	PANTHER	PTHR45739		9709	9871	2.9e-181	T
Vas2_433	12076	PANTHER	PTHR45739		6510	6766	2.9e-181	T
Vas2_433	12076	PANTHER	PTHR45739		3738	3994	2.9e-181	T
Vas2_433	12076	PANTHER	PTHR45739		9518	9679	2.9e-181	T
Vas2_433	12076	PANTHER	PTHR45739		2970	3132	2.9e-181	T
Vas2_433	12076	PANTHER	PTHR45739		3162	3324	2.9e-181	T
Vas2_433	12076	PANTHER	PTHR45739		9325	9581	2.9e-181	T
Vas2_433	12076	PANTHER	PTHR45739		4693	4852	2.9e-181	T
Vas2_433	12076	PANTHER	PTHR45739		6988	7244	2.9e-181	T
Vas2_433	12076	PANTHER	PTHR45739		1151	1334	2.9e-181	T
Vas2_433	12076	PANTHER	PTHR45739		1343	1526	2.9e-181	T
Vas2_433	12076	PANTHER	PTHR45739		3355	3516	2.9e-181	T
Vas2_433	12076	PANTHER	PTHR45739		1535	1791	2.9e-181	T
Vas2_433	12076	PANTHER	PTHR45739		5934	6117	2.9e-181	T
Vas2_433	12076	PANTHER	PTHR45739		959	1142	2.9e-181	T
Vas2_433	12076	PANTHER	PTHR45739		482	740	2.9e-181	T
Vas2_433	12076	PANTHER	PTHR45739		6318	6503	2.9e-181	T
Vas2_433	12076	MobiDBLite	mobidb-lite	consensus disorder prediction	12054	12076	-	T
Vas2_433	12076	MobiDBLite	mobidb-lite	consensus disorder prediction	169	205	-	T
Vas2_433	12076	MobiDBLite	mobidb-lite	consensus disorder prediction	12009	12028	-	T
Vas2_433	12076	MobiDBLite	mobidb-lite	consensus disorder prediction	79	106	-	T
Vas2_433	12076	SUPERFAMILY	SSF49899		10942	11088	5.54e-12	T	IPR013320	Concanavalin A-like lectin/glucanase domain superfamily
Vas2_1198	5779	MobiDBLite	mobidb-lite	consensus disorder prediction	1910	1924	-	T
Vas2_1198	5779	MobiDBLite	mobidb-lite	consensus disorder prediction	2873	2893	-	T
Vas2_1198	5779	MobiDBLite	mobidb-lite	consensus disorder prediction	953	967	-	T
Vas2_1198	5779	Pfam	PF17892	Cadherin-like domain	5229	5321	1.1e-15	T	IPR041690	Cadherin-like domain
Vas2_1198	5779	Pfam	PF00353	RTX calcium-binding nonapeptide repeat (4 copies)	5638	5671	1.4e-07	T	IPR001343	RTX calcium-binding nonapeptide repeat	GO:0005509
Vas2_1198	5779	MobiDBLite	mobidb-lite	consensus disorder prediction	1272	1292	-	T
Vas2_1198	5779	MobiDBLite	mobidb-lite	consensus disorder prediction	3194	3214	-	T
Vas2_1198	5779	TIGRFAM	TIGR03660	T1SS_rpt_143: T1SS-143 repeat domain	505	651	1.1e-19	T	IPR019959	T1SS-143 repeat-containing domain
Vas2_1198	5779	TIGRFAM	TIGR03660	T1SS_rpt_143: T1SS-143 repeat domain	1444	1597	1.4e-24	T	IPR019959	T1SS-143 repeat-containing domain
Vas2_1198	5779	TIGRFAM	TIGR03660	T1SS_rpt_143: T1SS-143 repeat domain	2084	2237	1.8e-24	T	IPR019959	T1SS-143 repeat-containing domain
Vas2_1198	5779	TIGRFAM	TIGR03660	T1SS_rpt_143: T1SS-143 repeat domain	1125	1279	8.3e-25	T	IPR019959	T1SS-143 repeat-containing domain
Vas2_1198	5779	TIGRFAM	TIGR03660	T1SS_rpt_143: T1SS-143 repeat domain	1763	1916	1.4e-24	T	IPR019959	T1SS-143 repeat-containing domain
Vas2_1198	5779	TIGRFAM	TIGR03660	T1SS_rpt_143: T1SS-143 repeat domain	799	959	1.2e-19	T	IPR019959	T1SS-143 repeat-containing domain
Vas2_1198	5779	TIGRFAM	TIGR03660	T1SS_rpt_143: T1SS-143 repeat domain	3366	3509	1e-24	T	IPR019959	T1SS-143 repeat-containing domain
Vas2_1198	5779	TIGRFAM	TIGR03660	T1SS_rpt_143: T1SS-143 repeat domain	2726	2879	3.5e-24	T	IPR019959	T1SS-143 repeat-containing domain
Vas2_1198	5779	TIGRFAM	TIGR03660	T1SS_rpt_143: T1SS-143 repeat domain	3047	3200	1.8e-24	T	IPR019959	T1SS-143 repeat-containing domain
Vas2_1198	5779	TIGRFAM	TIGR03660	T1SS_rpt_143: T1SS-143 repeat domain	2405	2558	1.8e-24	T	IPR019959	T1SS-143 repeat-containing domain
Vas2_1198	5779	MobiDBLite	mobidb-lite	consensus disorder prediction	2552	2572	-	T
Vas2_1198	5779	MobiDBLite	mobidb-lite	consensus disorder prediction	2873	2887	-	T
Vas2_1198	5779	MobiDBLite	mobidb-lite	consensus disorder prediction	953	973	-	T
Vas2_1198	5779	TIGRFAM	TIGR03661	T1SS_VCA0849: type I secretion C-terminal target domain (VC_A0849 subclass)	5683	5775	2.8e-08	T	IPR019960	Type I secretion C-terminal target domain, VC_A0849 subclass
Vas2_1198	5779	MobiDBLite	mobidb-lite	consensus disorder prediction	2552	2566	-	T
Vas2_1198	5779	MobiDBLite	mobidb-lite	consensus disorder prediction	2231	2251	-	T
Vas2_1198	5779	MobiDBLite	mobidb-lite	consensus disorder prediction	1591	1605	-	T
Vas2_1198	5779	ProSitePatterns	PS00330	Hemolysin-type calcium-binding region signature.	5643	5661	-	T	IPR018511	Hemolysin-type calcium-binding conserved site
Vas2_1198	5779	MobiDBLite	mobidb-lite	consensus disorder prediction	3194	3208	-	T
Vas2_1198	5779	ProSitePatterns	PS00330	Hemolysin-type calcium-binding region signature.	5652	5670	-	T	IPR018511	Hemolysin-type calcium-binding conserved site
Vas2_1198	5779	MobiDBLite	mobidb-lite	consensus disorder prediction	2231	2245	-	T
Vas2_1198	5779	MobiDBLite	mobidb-lite	consensus disorder prediction	1591	1611	-	T
Vas2_1198	5779	MobiDBLite	mobidb-lite	consensus disorder prediction	1272	1286	-	T
Vas2_1198	5779	MobiDBLite	mobidb-lite	consensus disorder prediction	1910	1930	-	T
Vas2_1198	5779	SUPERFAMILY	SSF51120		5543	5728	2.49e-17	T	IPR011049	Serralysin-like metalloprotease, C-terminal

## Sheet: 72GHs_GFF3
Related to Figure.3A. Generic Feature Format Version 3 (GFF3) file of the catalytic protein domains for a total of 72 GHs annotated by CAZy database.
seqid	source	type	start	end	score	strand	phase	attributes
Vas1_1058_GH13	SMART	protein_match	10	454	7.3e-24	+	.	Target=Vas1_1058_GH13 10 374;Ontology_term="GO:0003824","GO:0005975";ID=match$16_10_374;Name=SM00642;status=T;Dbxref="InterPro:IPR006047"
Vas1_1120_GH1	Pfam	protein_match	4	472	4.5e-137	+	.	Target=Vas1_1120_GH1 4 472;Ontology_term="GO:0004553","GO:0005975";ID=match$440_4_472;signature_desc=Glycosyl hydrolase family 1;Name=PF00232;status=T;Dbxref="InterPro:IPR001360"
Vas1_1280_GH3	Pfam	protein_match	51	676	7.6e-79	+	.	Target=Vas1_1280_GH3 67 405;Ontology_term="GO:0004553","GO:0005975";ID=match$483_67_405;signature_desc=Glycosyl hydrolase family 3 N terminal domain;Name=PF00933;status=T;Dbxref="InterPro:IPR001764"
Vas1_1309_GH2	SUPERFAMILY	protein_match	264	586	5.28e-61	+	.	Target=Vas1_1309_GH2 458 586;ID=match$268_458_586;Name=SSF51445;status=T;Dbxref="InterPro:IPR017853"
Vas1_1310_GH117	Gene3D	protein_match	48	305	3.3e-08	+	.	Target=Vas1_1310_GH117 211 293;ID=match$531_211_293;Name=G3DSA:2.115.10.20;status=T;Dbxref="InterPro:IPR023296"
Vas1_1312_GH50	Pfam	protein_match	595	939	5.8e-09	+	.	Target=Vas1_1312_GH50 658 842;Ontology_term="GO:0004565","GO:0005975","GO:0009341";ID=match$158_658_842;signature_desc=Beta-galactosidase;Name=PF02449;status=T;Dbxref="InterPro:IPR013529","KEGG:00052+3.2.1.23","KEGG:00511+3.2.1.23","KEGG:00531+3.2.1.23","KEGG:00600+3.2.1.23","KEGG:00604+3.2.1.23","MetaCyc:PWY-6807"
Vas1_1313_GH50	Gene3D	protein_match	543	904	1.6e-17	+	.	Target=Vas1_1313_GH50 602 904;Ontology_term="GO:0005975";ID=match$655_602_904;Name=G3DSA:3.20.20.80;status=T;Dbxref="InterPro:IPR013781"
Vas1_1314_GH50	Pfam	protein_match	610	955	3.5e-06	+	.	Target=Vas1_1314_GH50 677 849;Ontology_term="GO:0004565","GO:0005975","GO:0009341";ID=match$150_677_849;signature_desc=Beta-galactosidase;Name=PF02449;status=T;Dbxref="InterPro:IPR013529","KEGG:00052+3.2.1.23","KEGG:00511+3.2.1.23","KEGG:00531+3.2.1.23","KEGG:00600+3.2.1.23","KEGG:00604+3.2.1.23","MetaCyc:PWY-6807"
Vas1_1317_GH50	Pfam	protein_match	427	736	2.6e-05	+	.	Target=Vas1_1317_GH50 458 627;Ontology_term="GO:0004565","GO:0005975","GO:0009341";ID=match$359_458_627;signature_desc=Beta-galactosidase;Name=PF02449;status=T;Dbxref="InterPro:IPR013529","KEGG:00052+3.2.1.23","KEGG:00511+3.2.1.23","KEGG:00531+3.2.1.23","KEGG:00600+3.2.1.23","KEGG:00604+3.2.1.23","MetaCyc:PWY-6807"
Vas1_1339_GH16	ProSiteProfiles	protein_match	20	307	25.716	+	.	Target=Vas1_1339_GH16 23 300;Ontology_term="GO:0004553","GO:0005975";ID=match$505_23_300;signature_desc=Glycosyl hydrolases family 16 (GH16) domain profile.;Name=PS51762;status=T;Dbxref="InterPro:IPR000757"
Vas1_1435_GH73	PANTHER	protein_match	14	255	1.6e-73	+	.	Target=Vas1_1435_GH73 14 255;ID=match$161_14_255;Name=PTHR40572;status=T
Vas1_1562_GH26	Pfam	protein_match	1	320	3.5e-07	+	.	Target=Vas1_1562_GH26 115 287;Ontology_term="GO:0004553";ID=match$402_115_287;signature_desc=Glycosyl hydrolase family 26;Name=PF02156;status=T;Dbxref="InterPro:IPR022790"
Vas1_1621_GH117	CDD	protein_match	37	262	5.48e-71	+	.	Target=Vas1_1621_GH117 17 359;ID=match$661_17_359;signature_desc=GH43_like_2;Name=cd08994;status=T
Vas1_1669_GH2	SUPERFAMILY	protein_match	303	645	1.83e-62	+	.	Target=Vas1_1669_GH2 303 645;ID=match$72_303_645;Name=SSF51445;status=T;Dbxref="InterPro:IPR017853"
Vas1_1780_GH36	SUPERFAMILY	protein_match	194	535	2.33e-75	+	.	Target=Vas1_1780_GH36 194 535;ID=match$354_194_535;Name=SSF51445;status=T;Dbxref="InterPro:IPR017853"
Vas1_1781_GH103	Pfam	protein_match	11	321	1.1e-108	+	.	Target=Vas1_1781_GH103 24 319;ID=match$62_24_319;signature_desc=Transglycosylase SLT domain;Name=PF13406;status=T;Dbxref="InterPro:IPR031304"
Vas1_1937_GH36	SUPERFAMILY	protein_match	290	622	6.96e-106	+	.	Target=Vas1_1937_GH36 290 622;ID=match$643_290_622;Name=SSF51445;status=T;Dbxref="InterPro:IPR017853"
Vas1_1940_GH2	SUPERFAMILY	protein_match	329	616	1.82e-100	+	.	Target=Vas1_1940_GH2 329 616;ID=match$222_329_616;Name=SSF51445;status=T;Dbxref="InterPro:IPR017853"
Vas1_201_GH116	Pfam	protein_match	148	932	4.5e-59	+	.	Target=Vas1_201_GH116 509 932;Ontology_term="GO:0004553";ID=match$324_509_932;signature_desc=Glycosyl-hydrolase family 116, catalytic region;Name=PF04685;status=T;Dbxref="InterPro:IPR006775","KEGG:00511+3.2.1.45","KEGG:00600+3.2.1.45","Reactome:R-HSA-1660662"
Vas1_203_GH94	Pfam	protein_match	306	730	7.1e-134	+	.	Target=Vas1_203_GH94 306 730;ID=match$57_306_730;signature_desc=Glycosyl hydrolase 36 superfamily, catalytic domain;Name=PF17167;status=T;Dbxref="InterPro:IPR033432"
Vas1_2045_GH73	TIGRFAM	protein_match	10	313	9.3e-103	+	.	Target=Vas1_2045_GH73 10 313;Ontology_term="GO:0016798","GO:0044780";ID=match$558_10_313;signature_desc=flagell_FlgJ: flagellar rod assembly protein/muramidase FlgJ;Name=TIGR02541;status=T;Dbxref="InterPro:IPR013377"
Vas1_205_GH1	Pfam	protein_match	16	441	7.1e-149	+	.	Target=Vas1_205_GH1 16 441;Ontology_term="GO:0004553","GO:0005975";ID=match$588_16_441;signature_desc=Glycosyl hydrolase family 1;Name=PF00232;status=T;Dbxref="InterPro:IPR001360"
Vas1_2069_GH20	Pfam	protein_match	332	764	2.4e-108	+	.	Target=Vas1_2069_GH20 332 764;Ontology_term="GO:0004553","GO:0005975";ID=match$382_332_764;signature_desc=Glycosyl hydrolase family 20, catalytic domain;Name=PF00728;status=T;Dbxref="InterPro:IPR015883","KEGG:00511+3.2.1.52","KEGG:00513+3.2.1.52","KEGG:00520+3.2.1.52","KEGG:00531+3.2.1.52","KEGG:00603+3.2.1.52","KEGG:00604+3.2.1.52","MetaCyc:PWY-6902","MetaCyc:PWY-7822"
Vas1_2086_GH23	Gene3D	protein_match	107	269	2.2e-44	+	.	Target=Vas1_2086_GH23 107 269;ID=match$31_107_269;Name=G3DSA:1.10.530.10;status=T
Vas1_2308_GH9	SUPERFAMILY	protein_match	2	561	5.1e-82	+	.	Target=Vas1_2308_GH9 87 561;Ontology_term="GO:0003824";ID=match$136_87_561;Name=SSF48208;status=T;Dbxref="InterPro:IPR008928"
Vas1_2310_GH20	Pfam	protein_match	260	607	1.8e-114	+	.	Target=Vas1_2310_GH20 260 607;Ontology_term="GO:0004553","GO:0005975";ID=match$618_260_607;signature_desc=Glycosyl hydrolase family 20, catalytic domain;Name=PF00728;status=T;Dbxref="InterPro:IPR015883","KEGG:00511+3.2.1.52","KEGG:00513+3.2.1.52","KEGG:00520+3.2.1.52","KEGG:00531+3.2.1.52","KEGG:00603+3.2.1.52","KEGG:00604+3.2.1.52","MetaCyc:PWY-6902","MetaCyc:PWY-7822"
Vas1_2311_GH94	Pfam	protein_match	296	728	6.7e-206	+	.	Target=Vas1_2311_GH94 296 728;ID=match$451_296_728;signature_desc=Glycosyl hydrolase 36 superfamily, catalytic domain;Name=PF17167;status=T;Dbxref="InterPro:IPR033432"
Vas1_2369_GH23	SUPERFAMILY	protein_match	17	169	6.75e-21	+	.	Target=Vas1_2369_GH23 17 169;ID=match$468_17_169;Name=SSF53955;status=T;Dbxref="InterPro:IPR023346"
Vas1_34_GH13	SMART	protein_match	70	693	4.1e-76	+	.	Target=Vas1_34_GH13 203 656;Ontology_term="GO:0003824","GO:0005975";ID=match$516_203_656;Name=SM00642;status=T;Dbxref="InterPro:IPR006047"
Vas1_379_GH23	SUPERFAMILY	protein_match	206	371	5.63e-35	+	.	Target=Vas1_379_GH23 206 371;ID=match$431_206_371;Name=SSF53955;status=T;Dbxref="InterPro:IPR023346"
Vas1_561_GH3	Gene3D	protein_match	2	326	5.1e-93	+	.	Target=Vas1_561_GH3 3 283;Ontology_term="GO:0004553","GO:0005975";ID=match$446_3_283;Name=G3DSA:3.20.20.300;status=T;Dbxref="InterPro:IPR001764"
Vas1_568_GH23	SUPERFAMILY	protein_match	476	631	1.84e-47	+	.	Target=Vas1_568_GH23 476 631;ID=match$123_476_631;Name=SSF53955;status=T;Dbxref="InterPro:IPR023346"
Vas1_575_GH23	SUPERFAMILY	protein_match	305	462	2.25e-33	+	.	Target=Vas1_575_GH23 305 462;ID=match$541_305_462;Name=SSF53955;status=T;Dbxref="InterPro:IPR023346"
Vas1_647_GH102	SUPERFAMILY	protein_match	24	353	1.67e-99	+	.	Target=Vas1_647_GH102 24 352;ID=match$1_24_352;Name=SSF50685;status=T;Dbxref="InterPro:IPR009009"
Vas1_681_GH23	SUPERFAMILY	protein_match	255	405	8.13e-36	+	.	Target=Vas1_681_GH23 255 405;ID=match$165_255_405;Name=SSF53955;status=T;Dbxref="InterPro:IPR023346"
Vas1_720_GH13	SMART	protein_match	8	559	1.4e-161	+	.	Target=Vas1_720_GH13 18 419;Ontology_term="GO:0003824","GO:0005975";ID=match$487_18_419;Name=SM00642;status=T;Dbxref="InterPro:IPR006047"
Vas1_962_GH13	SMART	protein_match	182	1081	0.001	+	.	Target=Vas1_962_GH13 532 942;Ontology_term="GO:0003824","GO:0005975";ID=match$200_532_942;Name=SM00642;status=T;Dbxref="InterPro:IPR006047"
Vas2_108_GH43	SUPERFAMILY	protein_match	2	315	3.57e-101	+	.	Target=Vas2_108_GH43 2 315;ID=match$229_2_315;Name=SSF75005;status=T;Dbxref="InterPro:IPR023296"
Vas2_1256_GH18	Pfam	protein_match	27	598	2.7e-88	+	.	Target=Vas2_1256_GH18 167 581;Ontology_term="GO:0004553","GO:0005975";ID=match$243_167_581;signature_desc=Glycosyl hydrolases family 18;Name=PF00704;status=T;Dbxref="InterPro:IPR001223"
Vas2_1261_GH13	SMART	protein_match	131	725	1.1e-06	+	.	Target=Vas2_1261_GH13 257 595;Ontology_term="GO:0003824","GO:0005975";ID=match$86_257_595;Name=SM00642;status=T;Dbxref="InterPro:IPR006047"
Vas2_1262_GH77	Pfam	protein_match	6	723	8.1e-127	+	.	Target=Vas2_1262_GH77 177 699;Ontology_term="GO:0004134","GO:0005975";ID=match$700_177_699;signature_desc=4-alpha-glucanotransferase;Name=PF02446;status=T;Dbxref="InterPro:IPR003385","KEGG:00500+2.4.1.25","MetaCyc:PWY-5941","MetaCyc:PWY-6724","MetaCyc:PWY-6737","MetaCyc:PWY-7238"
Vas2_127_GH5	Pfam	protein_match	44	375	1.1e-36	+	.	Target=Vas2_127_GH5 65 356;Ontology_term="GO:0004553","GO:0005975";ID=match$320_65_356;signature_desc=Cellulase (glycosyl hydrolase family 5);Name=PF00150;status=T;Dbxref="InterPro:IPR001547"
Vas2_1287_GH13	SMART	protein_match	19	648	7.7e-05	+	.	Target=Vas2_1287_GH13 121 548;Ontology_term="GO:0003824","GO:0005975";ID=match$636_121_548;Name=SM00642;status=T;Dbxref="InterPro:IPR006047"
Vas2_1290_GH13	SMART	protein_match	49	526	5.5e-33	+	.	Target=Vas2_1290_GH13 54 440;Ontology_term="GO:0003824","GO:0005975";ID=match$288_54_440;Name=SM00642;status=T;Dbxref="InterPro:IPR006047"
Vas2_1291_GH13	SMART	protein_match	20	575	3.1e-96	+	.	Target=Vas2_1291_GH13 127 524;Ontology_term="GO:0003824","GO:0005975";ID=match$568_127_524;Name=SM00642;status=T;Dbxref="InterPro:IPR006047"
Vas2_1315_GH109	Pfam	protein_match	2	290	2.7e-25	+	.	Target=Vas2_1315_GH109 2 118;Ontology_term="GO:0016491";ID=match$562_2_118;signature_desc=Oxidoreductase family, NAD-binding Rossmann fold;Name=PF01408;status=T;Dbxref="InterPro:IPR000683";Target=Vas2_1315_GH109 142 324;ID=match$561_142_324;Name=G3DSA:3.30.360.10;status=T
Vas2_1437_GH109	Pfam	protein_match	9	297	1.4e-27	+	.	Target=Vas2_1437_GH109 9 125;Ontology_term="GO:0016491";ID=match$704_9_125;signature_desc=Oxidoreductase family, NAD-binding Rossmann fold;Name=PF01408;status=T;Dbxref="InterPro:IPR000683";Target=Vas2_1437_GH109 149 330;ID=match$702_149_330;Name=G3DSA:3.30.360.10;status=T
Vas2_150_GH4	Pfam	protein_match	3	435	5.6e-48	+	.	Target=Vas2_150_GH4 196 409;Ontology_term="GO:0004553";ID=match$43_196_409;signature_desc=Family 4 glycosyl hydrolase C-terminal domain;Name=PF11975;status=T;Dbxref="InterPro:IPR022616"
Vas2_250_GH8	Pfam	protein_match	29	424	3.3e-20	+	.	Target=Vas2_250_GH8 81 416;Ontology_term="GO:0004553","GO:0005975";ID=match$524_81_416;signature_desc=Glycosyl hydrolases family 8;Name=PF01270;status=T;Dbxref="InterPro:IPR002037","KEGG:00500+3.2.1.4","MetaCyc:PWY-6788"
Vas2_301_GH13	SMART	protein_match	7	391	6.1e-11	+	.	Target=Vas2_301_GH13 4 340;Ontology_term="GO:0003824","GO:0005975";ID=match$117_4_340;Name=SM00642;status=T;Dbxref="InterPro:IPR006047"
Vas2_434_GH9	SUPERFAMILY	protein_match	169	757	1.57e-118	+	.	Target=Vas2_434_GH9 259 757;Ontology_term="GO:0003824";ID=match$422_259_757;Name=SSF48208;status=T;Dbxref="InterPro:IPR008928"
Vas2_57_GH3	Pfam	protein_match	4	616	1.6e-69	+	.	Target=Vas2_57_GH3 24 330;Ontology_term="GO:0004553","GO:0005975";ID=match$605_24_330;signature_desc=Glycosyl hydrolase family 3 N terminal domain;Name=PF00933;status=T;Dbxref="InterPro:IPR001764"
Vas2_607_GH109	Pfam	protein_match	5	318	9.2e-19	+	.	Target=Vas2_607_GH109 5 127;Ontology_term="GO:0016491";ID=match$666_5_127;signature_desc=Oxidoreductase family, NAD-binding Rossmann fold;Name=PF01408;status=T;Dbxref="InterPro:IPR000683";Target=Vas2_607_GH109 146 267;Ontology_term="GO:0008152","GO:0016491","GO:0055114";ID=match$665_146_267;signature_desc=Oxidoreductase family, C-terminal alpha/beta domain;Name=PF02894;status=T;Dbxref="InterPro:I…
Vas2_61_GH10	Pfam	protein_match	44	362	1.2e-103	+	.	Target=Vas2_61_GH10 44 362;Ontology_term="GO:0004553","GO:0005975";ID=match$328_44_362;signature_desc=Glycosyl hydrolase family 10;Name=PF00331;status=T;Dbxref="InterPro:IPR001000","MetaCyc:PWY-6784"
Vas2_67_GH10	Pfam	protein_match	42	349	4.2e-104	+	.	Target=Vas2_67_GH10 42 349;Ontology_term="GO:0004553","GO:0005975";ID=match$342_42_349;signature_desc=Glycosyl hydrolase family 10;Name=PF00331;status=T;Dbxref="InterPro:IPR001000","MetaCyc:PWY-6784"
Vas2_71_GH36	SUPERFAMILY	protein_match	293	617	3.51e-101	+	.	Target=Vas2_71_GH36 293 617;ID=match$594_293_617;Name=SSF51445;status=T;Dbxref="InterPro:IPR017853"
Vas2_739_GH43	SUPERFAMILY	protein_match	24	323	2.43e-60	+	.	Target=Vas2_739_GH43 24 323;ID=match$464_24_323;Name=SSF75005;status=T;Dbxref="InterPro:IPR023296"
Vas2_741_GH88	Pfam	protein_match	18	396	6.7e-19	+	.	Target=Vas2_741_GH88 46 387;ID=match$709_46_387;signature_desc=Glycosyl Hydrolase Family 88;Name=PF07470;status=T;Dbxref="InterPro:IPR010905"
Vas2_758_GH88	Pfam	protein_match	7	373	1.7e-15	+	.	Target=Vas2_758_GH88 34 322;ID=match$687_34_322;signature_desc=Glycosyl Hydrolase Family 88;Name=PF07470;status=T;Dbxref="InterPro:IPR010905"
Vas2_764_GH43	SUPERFAMILY	protein_match	17	317	5e-57	+	.	Target=Vas2_764_GH43 17 317;ID=match$614_17_317;Name=SSF75005;status=T;Dbxref="InterPro:IPR023296"
Vas2_765_GH78	SUPERFAMILY	protein_match	147	879	8.16e-44	+	.	Target=Vas2_765_GH78 428 879;Ontology_term="GO:0003824";ID=match$712_428_879;Name=SSF48208;status=T;Dbxref="InterPro:IPR008928"
Vas2_768_GH88	Pfam	protein_match	21	388	1.6e-40	+	.	Target=Vas2_768_GH88 57 379;ID=match$146_57_379;signature_desc=Glycosyl Hydrolase Family 88;Name=PF07470;status=T;Dbxref="InterPro:IPR010905"
Vas2_771_GH88	Pfam	protein_match	7	373	6e-13	+	.	Target=Vas2_771_GH88 40 312;ID=match$540_40_312;signature_desc=Glycosyl Hydrolase Family 88;Name=PF07470;status=T;Dbxref="InterPro:IPR010905"
Vas2_79_GH43	SUPERFAMILY	protein_match	26	341	6.15e-58	+	.	Target=Vas2_79_GH43 26 341;ID=match$312_26_341;Name=SSF75005;status=T;Dbxref="InterPro:IPR023296"
Vas2_80_GH43	SUPERFAMILY	protein_match	5	322	2e-97	+	.	Target=Vas2_80_GH43 5 322;ID=match$110_5_322;Name=SSF75005;status=T;Dbxref="InterPro:IPR023296"
Vas2_84_GH3	Pfam	protein_match	2	651	1.1e-71	+	.	Target=Vas2_84_GH3 23 353;Ontology_term="GO:0004553","GO:0005975";ID=match$361_23_353;signature_desc=Glycosyl hydrolase family 3 N terminal domain;Name=PF00933;status=T;Dbxref="InterPro:IPR001764"
Vas2_844_GH109	Pfam	protein_match	2	288	2.2e-18	+	.	Target=Vas2_844_GH109 2 116;Ontology_term="GO:0016491";ID=match$104_2_116;signature_desc=Oxidoreductase family, NAD-binding Rossmann fold;Name=PF01408;status=T;Dbxref="InterPro:IPR000683";Target=Vas2_844_GH109 132 238;Ontology_term="GO:0008152","GO:0016491","GO:0055114";ID=match$106_132_238;signature_desc=Oxidoreductase family, C-terminal alpha/beta domain;Name=PF02894;status=T;Dbxref="InterPro:I…
Vas2_850_GH109	Pfam	protein_match	12	319	2.6e-26	+	.	Target=Vas2_850_GH109 12 142;Ontology_term="GO:0016491";ID=match$694_12_142;signature_desc=Oxidoreductase family, NAD-binding Rossmann fold;Name=PF01408;status=T;Dbxref="InterPro:IPR000683";Target=Vas2_850_GH109 154 276;Ontology_term="GO:0008152","GO:0016491","GO:0055114";ID=match$690_154_276;signature_desc=Oxidoreductase family, C-terminal alpha/beta domain;Name=PF02894;status=T;Dbxref="InterPro…
Vas2_922_GH16	Pfam	protein_match	36	305	1.6e-16	+	.	Target=Vas2_922_GH16 71 267;Ontology_term="GO:0004553","GO:0005975";ID=match$234_71_267;signature_desc=Glycosyl hydrolases family 16;Name=PF00722;status=T;Dbxref="InterPro:IPR000757"
Vas2_927_GH16	Pfam	protein_match	25	303	5.5e-19	+	.	Target=Vas2_927_GH16 70 266;Ontology_term="GO:0004553","GO:0005975";ID=match$676_70_266;signature_desc=Glycosyl hydrolases family 16;Name=PF00722;status=T;Dbxref="InterPro:IPR000757"
Vas2_928_GH16	Pfam	protein_match	33	322	1.3e-13	+	.	Target=Vas2_928_GH16 67 263;Ontology_term="GO:0004553","GO:0005975";ID=match$294_67_263;signature_desc=Glycosyl hydrolases family 16;Name=PF00722;status=T;Dbxref="InterPro:IPR000757"
Vas2_929_GH127	SUPERFAMILY	protein_match	11	538	2.72e-25	+	.	Target=Vas2_929_GH127 55 355;Ontology_term="GO:0003824";ID=match$679_55_355;Name=SSF48208;status=T;Dbxref="InterPro:IPR008928"

## Sheet: GenomeAssembly_list
Related to Figure.3C #A total of 45 subject genome assemblies used for sequence similarity searching of β-agarase gene cluster.
Species	Strain	NCBI_acc	Assembly
Agarivorans albus	MKT 106	GCA_000414175.1	ASM41417v1
Zobellia galactanivorans	DsiJT	GCF_000973105.1	ASM97310v1
Catenovulum agarivorans	YM01	GCF_000281085.1	ASM28108v1
Gayadomonas joobiniege	G7	GCF_000300815.1
Aliagarivorans marinus	DSM 23064	GCF_000429485.1	ASM42948v1
Agarivorans gilvus	WH0801	GCF_001420915.1	ASM142091v1
Alteromonas stellipolaris	LMG 21861	GCF_001562115.1	ASM156211v1
Shewanella japonica	KCTC 22435	GCF_002075795.1	ASM207579v1
Aquimarina agarilytica	ZC1	GCF_000255455.1	ASM25545v1
Colwellia agarivorans	QM50	GCF_002000085.1	ASM200008v1
Gilvimarinus agarilyticus	JEA5	GCF_000832015.1	ASM83201v1
Lewinella agarilytica	DSM 24740	GCF_900110645.1
Lewinella persica	DSM 23188	GCF_000373105.1	ASM37310v1
Vibrio agarivorans	289T	GCA_002894965.1	ASM289496v1
Vibrio astriarenae	C7	GCA_000755365.1	ASM75536v1
Vibrio sp.	EJY3		ASM24138v1
Photobacterium gaetbulicola	Gung47	GCA_000940995.1	ASM94099v1
Vibrio fluvialis	FDAARGOS_100	GCA_002953375.1	ASM295337v1
Vibrio fluvialis	ATCC 33809/FDAARGOS_104	GCA_001558415.2	ASM155841v2
Vibrio harveyi	QT520	GCA_001908435.2	ASM190843v2
Vibrio caribbeanicus	ATCC BAA-2122	GCF_000165125.1
Vibrio brasiliensis	LMG 20546	GCF_000189255.1	ASM18925v1
Vibrio sinaloensis	DSM 21326	GCF_000189275.1	ASM18927v1
Vibrio azureus	NBRC 104587	GCF_000467165.1	ASM46716v1
Vibrio maritimus	JCM 19235	GCF_000755385.1	ASM75538v1
Vibrio tubiashii	ATCC 19109	GCF_000772105.1	ASM77210v1
Vibrio harveyi	FDAARGOS_107	GCF_001558435.2	ASM155843v2
Vibrio vulnificus	CECT 4999	GCF_002215135.1	ASM221513v1
Vibrio celticus	CECT 7224	GCF_900089965.1
Vibrio hepatarius	DSM 19134	GCF_001274785.1	ASM127478v1
Vibrio variabilis	T01	GCF_000783325.1	ASM78332v1
Vibrio hangzhouensis		GCA_900107935.1
Vibrio mediterranei	117-T6	GCA_003726935.1	ASM372693v1
Vibrio orientalis	CIP 102891 = ATCC 33934	GCA_000222645.2	ASM22264v2
Catenovulum sp.	CCB-QB4	GCA_003063625.1	ASM306362v1
Alteromonas addita	R10SW13	GCF_001562195.1	ASM156219v1
Shewanella donghaensis	LT17	GCA_007567505.1	ASM756750v1
Vibrio parahaemolyticus	RIMD 2210633	GCF_000196095.1	ASM19609v1
Vibrio splendidus		GCF_001558015.1	ASM155801v1
Vibrio mexicanus		GCF_001012815.1	ASM101281v1
Vibrio ishigakensis	JCM19241	GCA_000830475.1	ASM83047v1
Vibrio coralliilyticus		GCF_000772065.1	ASM77206v1
Vibrio alginolyticus	NBRC 15630 = ATCC 17749	GCF_000354175.2	ASM35417v2
Vibrio campbellii	ATCC BAA-1116	GCF_000017705.1	ASM1770v1
Vibrio proteolyticus	NBRC 13287	GCF_000467125.1	ASM46712v1

## Sheet: Vas1_5GHs
Related to Figure.3C Upper panel# The output of MultiGeneBLAST v1.1.14 concerning the comparions of β-agarases containing regions on Vas1 (Four GH50s and a single GH16 Vas1_1339) among the investigated 46 genomes
Table of genes, locations, strands and annotations of query cluster:
Vas1_1305_1398836-14	0	1251	+	Vas1_1305_1398836-14	Vas1_1305_1398836-14
Vas1_1306_1400393-14	1351	2440	+	Vas1_1306_1400393-14	Vas1_1306_1400393-14
Vas1_1307_1401957-14	2540	3296	+	Vas1_1307_1401957-14	Vas1_1307_1401957-14
Vas1_1308_1402890-14	3396	4836	+	Vas1_1308_1402890-14	Vas1_1308_1402890-14
Vas1_1309_1404514-14	4936	7363	+	Vas1_1309_1404514-14	Vas1_1309_1404514-14
Vas1_1310_1407068-14	7463	8543	+	Vas1_1310_1407068-14	Vas1_1310_1407068-14
Vas1_1311_1408543-14	8643	9969	+	Vas1_1311_1408543-14	Vas1_1311_1408543-14
Vas1_1312_1409962-14	10069	12925	+	Vas1_1312_1409962-14	Vas1_1312_1409962-14
Vas1_1313_1412905-14	13025	16013	+	Vas1_1313_1412905-14	Vas1_1313_1412905-14
Vas1_1314_1416090-14	16113	19023	+	Vas1_1314_1416090-14	Vas1_1314_1416090-14
Vas1_1315_1419506-14	19123	20230	+	Vas1_1315_1419506-14	Vas1_1315_1419506-14
Vas1_1316_1421693-14	20330	21359	+	Vas1_1316_1421693-14	Vas1_1316_1421693-14
Vas1_1317_1423172-14	21459	23691	+	Vas1_1317_1423172-14	Vas1_1317_1423172-14
Vas1_1318_1425727-14	23791	24547	+	Vas1_1318_1425727-14	Vas1_1318_1425727-14
Vas1_1319_1426727-14	24647	25916	+	Vas1_1319_1426727-14	Vas1_1319_1426727-14
Vas1_1320_1428028-14	26016	26484	+	Vas1_1320_1428028-14	Vas1_1320_1428028-14
Vas1_1321_1428738-14	26584	28366	+	Vas1_1321_1428738-14	Vas1_1321_1428738-14
Vas1_1322_1430714-14	28466	29471	+	Vas1_1322_1430714-14	Vas1_1322_1430714-14
Vas1_1323_1431740-14	29571	30585	+	Vas1_1323_1431740-14	Vas1_1323_1431740-14
Vas1_1324_1432779-14	30685	32143	+	Vas1_1324_1432779-14	Vas1_1324_1432779-14
Vas1_1325_1434591-14	32243	33206	+	Vas1_1325_1434591-14	Vas1_1325_1434591-14
Vas1_1326_1435569-14	33306	33924	+	Vas1_1326_1435569-14	Vas1_1326_1435569-14
Vas1_1327_1436204-14	34024	35110	+	Vas1_1327_1436204-14	Vas1_1327_1436204-14
Vas1_1328_1437485-14	35210	38408	+	Vas1_1328_1437485-14	Vas1_1328_1437485-14
Vas1_1329_1440918-14	38508	38940	+	Vas1_1329_1440918-14	Vas1_1329_1440918-14
Vas1_1330_1441483-14	39040	40375	+	Vas1_1330_1441483-14	Vas1_1330_1441483-14
Vas1_1331_1442887-14	40475	41792	+	Vas1_1331_1442887-14	Vas1_1331_1442887-14
Vas1_1332_1444387-14	41892	42744	+	Vas1_1332_1444387-14	Vas1_1332_1444387-14
Vas1_1333_1445600-14	42844	43786	+	Vas1_1333_1445600-14	Vas1_1333_1445600-14
Vas1_1334_1446738-14	43886	45479	+	Vas1_1334_1446738-14	Vas1_1334_1446738-14
Vas1_1335_1448550-14	45579	47055	+	Vas1_1335_1448550-14	Vas1_1335_1448550-14
Vas1_1336_1450038-14	47155	48127	+	Vas1_1336_1450038-14	Vas1_1336_1450038-14
Vas1_1337_1451012-14	48227	49523	+	Vas1_1337_1451012-14	Vas1_1337_1451012-14
Vas1_1338_1452377-14	49623	50376	+	Vas1_1338_1452377-14	Vas1_1338_1452377-14
Vas1_1339_1453450-14	50476	51832	+	Vas1_1339_1453450-14	Vas1_1339_1453450-14
Vas1_1340_1455206-14	51932	52721	+	Vas1_1340_1455206-14	Vas1_1340_1455206-14
Vas1_1341_1456011-14	52821	53487	+	Vas1_1341_1456011-14	Vas1_1341_1456011-14
Vas1_1342_1456691-14	53587	54235	+	Vas1_1342_1456691-14	Vas1_1342_1456691-14
Vas1_1343_1457463-14	54335	54926	+	Vas1_1343_1457463-14	Vas1_1343_1457463-14
Vas1_1344_1458095-14	55026	55836	+	Vas1_1344_1458095-14	Vas1_1344_1458095-14
Vas1_1345_1458933-14	55936	57127	+	Vas1_1345_1458933-14	Vas1_1345_1458933-14
Vas1_1346_1460123-14	57227	58796	+	Vas1_1346_1460123-14	Vas1_1346_1460123-14
Vas1_1347_1461691-14	58896	60123	+	Vas1_1347_1461691-14	Vas1_1347_1461691-14
Vas1_1348_1462939-14	60223	61474	+	Vas1_1348_1462939-14	Vas1_1348_1462939-14
Vas1_1349_1464197-14	61574	62420	+	Vas1_1349_1464197-14	Vas1_1349_1464197-14
Vas1_1350_1465069-14	62520	63093	+	Vas1_1350_1465069-14	Vas1_1350_1465069-14
Significant hits:
1. Vas1_8	No definition line found.
2. CP003241_14	Vibrio sp. EJY3 chromosome 1, complete sequence.
3. BBMQ01000089_0	Vibrio sp. C7 DNA, contig: contig00048, strain: JCM 19233, whole genome shotgun sequence.
4. NZ_CP013021_17	Agarivorans gilvus strain WH0801, complete genome.
5. BARX01000027_0	Agarivorans albus MKT 106 DNA, contig: contig00027, whole genome shotgun sequence.
6. NZ_KE386908_1	Aliagarivorans marinus DSM 23064 G461DRAFT_scaffold00002.2, whole genome shotgun sequence.
7. NZ_FLQZ01000063_0	Vibrio celticus strain CECT 7224, whole genome shotgun sequence.
8. NZ_JXCJ01000001_4	Gilvimarinus agarilyticus strain JEA5 scaffold1, whole genome shotgun sequence.
9. BBMQ01000118_0	Vibrio sp. C7 DNA, contig: contig00027, strain: JCM 19233, whole genome shotgun sequence.
10. NZ_MUZU01000002_0	Colwellia agarivorans strain QM50 contig2, whole genome shotgun sequence.
11. NZ_CP020472_10	Shewanella japonica strain KCTC 22435 chromosome, complete genome.
12. BBSC01000005_1	Vibrio ishigakensis DNA, contig00005, strain: JCM19241, whole genome shotgun sequence.
13. NZ_CP013926_4	Alteromonas stellipolaris strain LMG 21861, complete genome.
14. BBMQ01000064_0	Vibrio sp. C7 DNA, contig: contig00095, strain: JCM 19233, whole genome shotgun sequence.
15. CP014034_5	Vibrio fluvialis strain ATCC 33809 chromosome 1, complete sequence.
16. CP014032_7	Vibrio fluvialis strain FDAARGOS_100 chromosome 2, complete sequence.
17. NZ_AMRX01000008_2	Gayadomonas joobiniege G7 plasmid pG7, whole genome shotgun sequence.
18. CP026604_2	Catenovulum sp. CCB-QB4 chromosome, complete genome.
19. CP018681_8	Vibrio harveyi isolate QT520 chromosome 2, complete sequence.
20. NZ_CP014322_2	Alteromonas addita strain R10SW13, complete genome.
21. NZ_FLQZ01000176_0	Vibrio celticus strain CECT 7224, whole genome shotgun sequence.
22. CP026604_9	Catenovulum sp. CCB-QB4 chromosome, complete genome.
23. CP005973_4	Photobacterium gaetbulicola Gung47 chromosome 1, complete sequence.
24. NZ_AMRX01000008_3	Gayadomonas joobiniege G7 plasmid pG7, whole genome shotgun sequence.
25. NZ_AMRX01000008_8	Gayadomonas joobiniege G7 plasmid pG7, whole genome shotgun sequence.
26. NZ_AMRX01000008_10	Gayadomonas joobiniege G7 plasmid pG7, whole genome shotgun sequence.
27. NZ_AUBY01000017_0	Aliagarivorans marinus DSM 23064 G461DRAFT_scaffold00012.12_C, whole genome shotgun sequence.
28. NZ_AUBY01000016_0	Aliagarivorans marinus DSM 23064 G461DRAFT_scaffold00011.11_C, whole genome shotgun sequence.
29. CP003241_7	Vibrio sp. EJY3 chromosome 1, complete sequence.
30. CP026604_3	Catenovulum sp. CCB-QB4 chromosome, complete genome.
31. CP026604_19	Catenovulum sp. CCB-QB4 chromosome, complete genome.
32. NZ_KB890458_0	Lewinella persica DSM 23188 B036DRAFT_scaffold_5.6, whole genome shotgun sequence.
33. NZ_CP014636_8	Vibrio vulnificus strain CECT 4999 chromosome I, complete sequence.
34. NZ_LHPI01000001_1	Vibrio hepatarius strain DSM 19134 contig0001, whole genome shotgun sequence.
35. CP005973_13	Photobacterium gaetbulicola Gung47 chromosome 1, complete sequence.
36. NZ_AUBY01000013_0	Aliagarivorans marinus DSM 23064 G461DRAFT_scaffold00008.8_C, whole genome shotgun sequence.
37. CP026604_10	Catenovulum sp. CCB-QB4 chromosome, complete genome.
38. BBMQ01000126_0	Vibrio sp. C7 DNA, contig: contig00105, strain: JCM 19233, whole genome shotgun sequence.
39. NZ_JH621246_1	Aquimarina agarilytica ZC1 Scaffold1, whole genome shotgun sequence.
40. NZ_JH767538_0	Catenovulum agarivorans YM01 Scaffold19, whole genome shotgun sequence.
41. NC_015844_21	Zobellia galactanivorans strain DsiJT chromosome, complete genome.
42. NZ_AJWM01000041_1	Catenovulum agarivorans YM01 Scaffold10_1, whole genome shotgun sequence.
43. CP026604_11	Catenovulum sp. CCB-QB4 chromosome, complete genome.
44. NZ_JH767544_0	Catenovulum agarivorans YM01 Scaffold26, whole genome shotgun sequence.
45. NZ_CP013926_8	Alteromonas stellipolaris strain LMG 21861, complete genome.
46. NZ_AUBY01000016_1	Aliagarivorans marinus DSM 23064 G461DRAFT_scaffold00011.11_C, whole genome shotgun sequence.
47. CP003242_5	Vibrio sp. EJY3 chromosome 2, complete sequence.
48. NZ_CP013021_32	Agarivorans gilvus strain WH0801, complete genome.
49. BARX01000022_1	Agarivorans albus MKT 106 DNA, contig: contig00022, whole genome shotgun sequence.
50. CP033578_4	Vibrio mediterranei strain 117-T6 chromosome 2, complete sequence.
51. BBSC01000003_0	Vibrio ishigakensis DNA, contig00003, strain: JCM19241, whole genome shotgun sequence.
52. CP014034_9	Vibrio fluvialis strain ATCC 33809 chromosome 1, complete sequence.
53. FNVG01000014_0	Vibrio hangzhouensis strain CGMCC 1.7062 genome assembly, contig: Ga0070180_114, whole genome shotgun sequence.
54. NZ_AMRX01000008_1	Gayadomonas joobiniege G7 plasmid pG7, whole genome shotgun sequence.
55. NZ_JH767544_1	Catenovulum agarivorans YM01 Scaffold26, whole genome shotgun sequence.
56. NZ_CP020472_7	Shewanella japonica strain KCTC 22435 chromosome, complete genome.
57. BBMQ01000193_0	Vibrio sp. C7 DNA, contig: contig00133, strain: JCM 19233, whole genome shotgun sequence.
58. NZ_AJWM01000041_0	Catenovulum agarivorans YM01 Scaffold10_1, whole genome shotgun sequence.
59. NZ_MUZU01000001_1	Colwellia agarivorans strain QM50 contig1, whole genome shotgun sequence.
60. CP026604_15	Catenovulum sp. CCB-QB4 chromosome, complete genome.
61. CP026604_28	Catenovulum sp. CCB-QB4 chromosome, complete genome.
62. NZ_FOFB01000005_0	Lewinella agarilytica strain DSM 24740, whole genome shotgun sequence.
63. NZ_LNQX01000001_0	Vibrio splendidus strain NCCB 53037 NODE_1, whole genome shotgun sequence.
64. NZ_CP014039_4	Vibrio harveyi strain FDAARGOS_107 chromosome 2, complete sequence.
65. CP026604_17	Catenovulum sp. CCB-QB4 chromosome, complete genome.
66. CP014034_3	Vibrio fluvialis strain ATCC 33809 chromosome 1, complete sequence.
67. CP014032_5	Vibrio fluvialis strain FDAARGOS_100 chromosome 2, complete sequence.
68. NZ_CP014637_14	Vibrio vulnificus strain CECT 4999 chromosome II, complete sequence.
69. CP018681_14	Vibrio harveyi isolate QT520 chromosome 2, complete sequence.
70. NC_004605_13	Vibrio parahaemolyticus RIMD 2210633 chromosome 2, complete sequence.
71. NZ_CP009355_3	Vibrio tubiashii ATCC 19109 chromosome 2, complete sequence.
72. NZ_FOFB01000021_0	Lewinella agarilytica strain DSM 24740, whole genome shotgun sequence.
73. CP014032_9	Vibrio fluvialis strain FDAARGOS_100 chromosome 2, complete sequence.
74. NZ_FLQZ01000031_0	Vibrio celticus strain CECT 7224, whole genome shotgun sequence.
75. NZ_CP013926_16	Alteromonas stellipolaris strain LMG 21861, complete genome.
76. BBMQ01000263_0	Vibrio sp. C7 DNA, contig: contig00022, strain: JCM 19233, whole genome shotgun sequence.
77. NZ_KE386909_1	Aliagarivorans marinus DSM 23064 G461DRAFT_scaffold00003.3, whole genome shotgun sequence.
78. BBMQ01000053_0	Vibrio sp. C7 DNA, contig: contig00002, strain: JCM 19233, whole genome shotgun sequence.
79. NC_022359_12	Vibrio alginolyticus NBRC 15630 = ATCC 17749 chromosome 2, complete sequence.
80. AFWH01000018_0	Vibrio orientalis CIP 102891 = ATCC 33934 strain CIP 102891 VIOR3934_2, whole genome shotgun sequence.
81. CP014034_13	Vibrio fluvialis strain ATCC 33809 chromosome 1, complete sequence.
82. CP033578_7	Vibrio mediterranei strain 117-T6 chromosome 2, complete sequence.
83. CP014032_1	Vibrio fluvialis strain FDAARGOS_100 chromosome 2, complete sequence.
84. NZ_BATJ01000011_1	Vibrio proteolyticus NBRC 13287, whole genome shotgun sequence.
85. BBMQ01000319_0	Vibrio sp. C7 DNA, contig: contig00056, strain: JCM 19233, whole genome shotgun sequence.
86. NZ_MUZU01000002_5	Colwellia agarivorans strain QM50 contig2, whole genome shotgun sequence.
87. NZ_JH621250_0	Aquimarina agarilytica ZC1 Scaffold5, whole genome shotgun sequence.
88. NZ_LNQX01000004_1	Vibrio splendidus strain NCCB 53037 NODE_4, whole genome shotgun sequence.
89. Vas1_10	No definition line found.
90. NZ_BATJ01000017_0	Vibrio proteolyticus NBRC 13287, whole genome shotgun sequence.
91. AFWH01000018_1	Vibrio orientalis CIP 102891 = ATCC 33934 strain CIP 102891 VIOR3934_2, whole genome shotgun sequence.
92. BARX01000033_0	Agarivorans albus MKT 106 DNA, contig: contig00033, whole genome shotgun sequence.
93. NZ_AMRX01000006_4	Gayadomonas joobiniege G7 G7_contig6, whole genome shotgun sequence.
94. Vas2_1	No definition line found.
95. NZ_LHPI01000001_0	Vibrio hepatarius strain DSM 19134 contig0001, whole genome shotgun sequence.
96. NZ_CP013926_9	Alteromonas stellipolaris strain LMG 21861, complete genome.
97. CP014034_1	Vibrio fluvialis strain ATCC 33809 chromosome 1, complete sequence.
98. CP005973_17	Photobacterium gaetbulicola Gung47 chromosome 1, complete sequence.
99. NZ_AMRX01000008_0	Gayadomonas joobiniege G7 plasmid pG7, whole genome shotgun sequence.
100. NZ_AMRX01000006_3	Gayadomonas joobiniege G7 G7_contig6, whole genome shotgun sequence.
101. CP005974_14	Photobacterium gaetbulicola Gung47 chromosome 2, complete sequence.
102. NC_009783_11	Vibrio campbellii ATCC BAA-1116 chromosome I, complete sequence.
103. CP033578_5	Vibrio mediterranei strain 117-T6 chromosome 2, complete sequence.
104. NZ_BBMR01000005_0	Vibrio maritimus strain JCM 19235, whole genome shotgun sequence.
105. NZ_AEIU01000069_2	Vibrio caribbeanicus ATCC BAA-2122 VIBC2010_38, whole genome shotgun sequence.
106. NZ_AEIU01000052_0	Vibrio caribbeanicus ATCC BAA-2122 VIBC2010_20, whole genome shotgun sequence.
107. NZ_AEVS01000084_0	Vibrio brasiliensis LMG 20546 VIBR0546_55, whole genome shotgun sequence.
108. NZ_CP014637_0	Vibrio vulnificus strain CECT 4999 chromosome II, complete sequence.
109. BARX01000001_0	Agarivorans albus MKT 106 DNA, contig: contig00001, whole genome shotgun sequence.
110. NZ_AEVT01000018_0	Vibrio sinaloensis DSM 21326 VISI1226_12, whole genome shotgun sequence.
111. NZ_BBMR01000001_4	Vibrio maritimus strain JCM 19235, whole genome shotgun sequence.
112. NZ_AUBY01000009_1	Aliagarivorans marinus DSM 23064 G461DRAFT_scaffold00005.5_C, whole genome shotgun sequence.
113. NZ_MUZU01000002_1	Colwellia agarivorans strain QM50 contig2, whole genome shotgun sequence.
114. NZ_AEVS01000094_0	Vibrio brasiliensis LMG 20546 VIBR0546_64, whole genome shotgun sequence.
115. FNVG01000001_2	Vibrio hangzhouensis strain CGMCC 1.7062 genome assembly, contig: Ga0070180_101, whole genome shotgun sequence.
116. CP026604_7	Catenovulum sp. CCB-QB4 chromosome, complete genome.
117. NZ_CP014038_2	Vibrio harveyi strain FDAARGOS_107 chromosome 1, complete sequence.
118. CP018680_6	Vibrio harveyi isolate QT520 chromosome 1, complete sequence.
119. CP033578_10	Vibrio mediterranei strain 117-T6 chromosome 2, complete sequence.
120. NZ_AEIU01000074_0	Vibrio caribbeanicus ATCC BAA-2122 VIBC2010_42, whole genome shotgun sequence.
121. CP026605_0	Catenovulum sp. CCB-QB4 plasmid unnamed1, complete sequence.
122. CP033578_2	Vibrio mediterranei strain 117-T6 chromosome 2, complete sequence.
123. NZ_JRWM01000028_0	Vibrio variabilis strain T01 Contig28, whole genome shotgun sequence.
124. CP003242_3	Vibrio sp. EJY3 chromosome 2, complete sequence.
125. CP003242_12	Vibrio sp. EJY3 chromosome 2, complete sequence.
126. NC_022359_14	Vibrio alginolyticus NBRC 15630 = ATCC 17749 chromosome 2, complete sequence.
127. NZ_CP009356_0	Vibrio tubiashii ATCC 19109 plasmid p251, complete sequence.
128. CP018681_6	Vibrio harveyi isolate QT520 chromosome 2, complete sequence.
129. NZ_CP014039_12	Vibrio harveyi strain FDAARGOS_107 chromosome 2, complete sequence.
130. CP026604_1	Catenovulum sp. CCB-QB4 chromosome, complete genome.
131. NZ_BATJ01000001_4	Vibrio proteolyticus NBRC 13287, whole genome shotgun sequence.
132. NZ_LNQX01000001_7	Vibrio splendidus strain NCCB 53037 NODE_1, whole genome shotgun sequence.
133. NZ_KB890423_1	Lewinella persica DSM 23188 B036DRAFT_scaffold_18.19, whole genome shotgun sequence.
134. NZ_AEIU01000069_1	Vibrio caribbeanicus ATCC BAA-2122 VIBC2010_38, whole genome shotgun sequence.
135. BARX01000002_2	Agarivorans albus MKT 106 DNA, contig: contig00002, whole genome shotgun sequence.
136. NC_015844_11	Zobellia galactanivorans strain DsiJT chromosome, complete genome.
137. NZ_FLQZ01000080_0	Vibrio celticus strain CECT 7224, whole genome shotgun sequence.
138. NC_015844_12	Zobellia galactanivorans strain DsiJT chromosome, complete genome.
139. CP033577_11	Vibrio mediterranei strain 117-T6 chromosome 1, complete sequence.
140. BBSC01000003_5	Vibrio ishigakensis DNA, contig00003, strain: JCM19241, whole genome shotgun sequence.
141. CP014035_13	Vibrio fluvialis strain ATCC 33809 chromosome 2, complete sequence.
142. CP014033_5	Vibrio fluvialis strain FDAARGOS_100 chromosome 1, complete sequence.
143. NZ_BATL01000055_0	Vibrio azureus NBRC 104587, whole genome shotgun sequence.
144. CP033577_10	Vibrio mediterranei strain 117-T6 chromosome 1, complete sequence.
145. FNVG01000013_0	Vibrio hangzhouensis strain CGMCC 1.7062 genome assembly, contig: Ga0070180_113, whole genome shotgun sequence.
146. Vas1_13	No definition line found.
147. FNVG01000001_1	Vibrio hangzhouensis strain CGMCC 1.7062 genome assembly, contig: Ga0070180_101, whole genome shotgun sequence.
148. NZ_CP014039_11	Vibrio harveyi strain FDAARGOS_107 chromosome 2, complete sequence.
149. NC_004605_6	Vibrio parahaemolyticus RIMD 2210633 chromosome 2, complete sequence.
150. CP018681_7	Vibrio harveyi isolate QT520 chromosome 2, complete sequence.
151. NZ_FLQZ01000087_0	Vibrio celticus strain CECT 7224, whole genome shotgun sequence.
152. NZ_JRWM01000006_1	Vibrio variabilis strain T01 Contig6, whole genome shotgun sequence.
153. POWH01000074_0	Vibrio agarivorans strain CAIM 1911 contig_74, whole genome shotgun sequence.
154. NZ_CP009354_8	Vibrio tubiashii ATCC 19109 chromosome 1, complete sequence.
155. NZ_CP009618_14	Vibrio coralliilyticus strain RE98 chromosome 2, complete sequence.
156. NZ_BATJ01000003_0	Vibrio proteolyticus NBRC 13287, whole genome shotgun sequence.
157. NZ_CP014038_14	Vibrio harveyi strain FDAARGOS_107 chromosome 1, complete sequence.
158. CP018680_0	Vibrio harveyi isolate QT520 chromosome 1, complete sequence.
159. CP005973_11	Photobacterium gaetbulicola Gung47 chromosome 1, complete sequence.
160. NZ_JYJP01000001_0	Vibrio mexicanus strain CAIM 1540 contig00001, whole genome shotgun sequence.
161. NZ_AEVS01000035_0	Vibrio brasiliensis LMG 20546 VIBR0546_16, whole genome shotgun sequence.
162. NC_022349_15	Vibrio alginolyticus NBRC 15630 = ATCC 17749 chromosome 1, complete sequence.
163. CP003241_16	Vibrio sp. EJY3 chromosome 1, complete sequence.
164. Vas2_4	No definition line found.
165. NZ_AEVT01000083_0	Vibrio sinaloensis DSM 21326 VISI1226_47, whole genome shotgun sequence.
166. CP014034_2	Vibrio fluvialis strain ATCC 33809 chromosome 1, complete sequence.
167. CP014032_4	Vibrio fluvialis strain FDAARGOS_100 chromosome 2, complete sequence.
168. CP033577_1	Vibrio mediterranei strain 117-T6 chromosome 1, complete sequence.
169. NZ_JRWM01000028_1	Vibrio variabilis strain T01 Contig28, whole genome shotgun sequence.
170. BARX01000045_0	Agarivorans albus MKT 106 DNA, contig: contig00045, whole genome shotgun sequence.
171. NZ_AEVT01000006_0	Vibrio sinaloensis DSM 21326 VISI1226_104, whole genome shotgun sequence.
172. CP014035_9	Vibrio fluvialis strain ATCC 33809 chromosome 2, complete sequence.
173. CP014033_1	Vibrio fluvialis strain FDAARGOS_100 chromosome 1, complete sequence.
174. NZ_CP013021_30	Agarivorans gilvus strain WH0801, complete genome.
175. NC_022349_6	Vibrio alginolyticus NBRC 15630 = ATCC 17749 chromosome 1, complete sequence.
176. CP003241_10	Vibrio sp. EJY3 chromosome 1, complete sequence.
177. NZ_KE386907_1	Aliagarivorans marinus DSM 23064 G461DRAFT_scaffold00001.1, whole genome shotgun sequence.
178. BBSC01000015_0	Vibrio ishigakensis DNA, contig00015, strain: JCM19241, whole genome shotgun sequence.
179. FNVG01000004_2	Vibrio hangzhouensis strain CGMCC 1.7062 genome assembly, contig: Ga0070180_104, whole genome shotgun sequence.
180. NZ_JRWM01000019_0	Vibrio variabilis strain T01 Contig19, whole genome shotgun sequence.
181. NZ_AEVT01000048_0	Vibrio sinaloensis DSM 21326 VISI1226_174, whole genome shotgun sequence.
182. CP033577_5	Vibrio mediterranei strain 117-T6 chromosome 1, complete sequence.
183. NZ_CP014038_10	Vibrio harveyi strain FDAARGOS_107 chromosome 1, complete sequence.
184. AFWH01000023_0	Vibrio orientalis CIP 102891 = ATCC 33934 strain CIP 102891 VIOR3934_24, whole genome shotgun sequence.
185. NZ_FLQZ01000059_1	Vibrio celticus strain CECT 7224, whole genome shotgun sequence.
186. NC_009783_1	Vibrio campbellii ATCC BAA-1116 chromosome I, complete sequence.
187. CP014033_11	Vibrio fluvialis strain FDAARGOS_100 chromosome 1, complete sequence.
188. NZ_LHPI01000002_0	Vibrio hepatarius strain DSM 19134 contig0002, whole genome shotgun sequence.
189. CP003242_6	Vibrio sp. EJY3 chromosome 2, complete sequence.
190. NZ_JYJP01000119_0	Vibrio mexicanus strain CAIM 1540 contig00153, whole genome shotgun sequence.
191. NZ_FLQZ01000117_0	Vibrio celticus strain CECT 7224, whole genome shotgun sequence.
192. NC_009784_9	Vibrio campbellii ATCC BAA-1116 chromosome II, complete sequence.
193. NZ_LNQX01000027_0	Vibrio splendidus strain NCCB 53037 NODE_27, whole genome shotgun sequence.
194. FNVG01000021_0	Vibrio hangzhouensis strain CGMCC 1.7062 genome assembly, contig: Ga0070180_121, whole genome shotgun sequence.
195. Vas2_0	No definition line found.
196. NZ_CP014038_1	Vibrio harveyi strain FDAARGOS_107 chromosome 1, complete sequence.
197. CP018680_5	Vibrio harveyi isolate QT520 chromosome 1, complete sequence.
198. NZ_MUZU01000004_0	Colwellia agarivorans strain QM50 contig4, whole genome shotgun sequence.
199. NZ_CP009354_17	Vibrio tubiashii ATCC 19109 chromosome 1, complete sequence.
200. NZ_BATJ01000022_0	Vibrio proteolyticus NBRC 13287, whole genome shotgun sequence.
201. NZ_CP009354_4	Vibrio tubiashii ATCC 19109 chromosome 1, complete sequence.
202. NC_004603_4	Vibrio parahaemolyticus RIMD 2210633 chromosome 1, complete sequence.
203. NC_009783_10	Vibrio campbellii ATCC BAA-1116 chromosome I, complete sequence.
204. AFWH01000016_1	Vibrio orientalis CIP 102891 = ATCC 33934 strain CIP 102891 VIOR3934_18, whole genome shotgun sequence.
205. NZ_CP009617_5	Vibrio coralliilyticus strain RE98 chromosome 1, complete sequence.
206. NZ_AEIU01000022_0	Vibrio caribbeanicus ATCC BAA-2122 VIBC2010_132, whole genome shotgun sequence.
207. Vas1_0	No definition line found.
208. NZ_CP013926_17	Alteromonas stellipolaris strain LMG 21861, complete genome.
209. NZ_LNQX01000001_3	Vibrio splendidus strain NCCB 53037 NODE_1, whole genome shotgun sequence.
210. NC_004605_3	Vibrio parahaemolyticus RIMD 2210633 chromosome 2, complete sequence.
211. NZ_AEVS01000071_0	Vibrio brasiliensis LMG 20546 VIBR0546_43, whole genome shotgun sequence.
212. NC_022359_8	Vibrio alginolyticus NBRC 15630 = ATCC 17749 chromosome 2, complete sequence.
213. BARX01000038_0	Agarivorans albus MKT 106 DNA, contig: contig00038, whole genome shotgun sequence.
214. BARX01000010_0	Agarivorans albus MKT 106 DNA, contig: contig00010, whole genome shotgun sequence.
215. NZ_JYJP01000021_0	Vibrio mexicanus strain CAIM 1540 contig00030, whole genome shotgun sequence.
216. AFWH01000062_1	Vibrio orientalis CIP 102891 = ATCC 33934 strain CIP 102891 VIOR3934_6, whole genome shotgun sequence.
217. CP003242_2	Vibrio sp. EJY3 chromosome 2, complete sequence.
218. NZ_CP013021_2	Agarivorans gilvus strain WH0801, complete genome.
219. NZ_AUBY01000029_0	Aliagarivorans marinus DSM 23064 G461DRAFT_scaffold00024.24_C, whole genome shotgun sequence.
220. FNVG01000018_0	Vibrio hangzhouensis strain CGMCC 1.7062 genome assembly, contig: Ga0070180_118, whole genome shotgun sequence.
221. BARX01000048_0	Agarivorans albus MKT 106 DNA, contig: contig00048, whole genome shotgun sequence.
222. CP033578_17	Vibrio mediterranei strain 117-T6 chromosome 2, complete sequence.
223. NZ_LHPI01000001_4	Vibrio hepatarius strain DSM 19134 contig0001, whole genome shotgun sequence.
224. NZ_JH621258_0	Aquimarina agarilytica ZC1 Scaffold13, whole genome shotgun sequence.
225. NZ_CP013926_0	Alteromonas stellipolaris strain LMG 21861, complete genome.
226. NZ_JH621247_2	Aquimarina agarilytica ZC1 Scaffold2, whole genome shotgun sequence.
227. BBMQ01000110_0	Vibrio sp. C7 DNA, contig: contig00015, strain: JCM 19233, whole genome shotgun sequence.
228. CP033578_3	Vibrio mediterranei strain 117-T6 chromosome 2, complete sequence.
229. FNVG01000002_3	Vibrio hangzhouensis strain CGMCC 1.7062 genome assembly, contig: Ga0070180_102, whole genome shotgun sequence.
230. CP003241_12	Vibrio sp. EJY3 chromosome 1, complete sequence.
231. NZ_CP014322_0	Alteromonas addita strain R10SW13, complete genome.
232. CP026604_27	Catenovulum sp. CCB-QB4 chromosome, complete genome.
233. NZ_BATJ01000002_0	Vibrio proteolyticus NBRC 13287, whole genome shotgun sequence.
234. NZ_CP009355_5	Vibrio tubiashii ATCC 19109 chromosome 2, complete sequence.
235. NC_022349_3	Vibrio alginolyticus NBRC 15630 = ATCC 17749 chromosome 1, complete sequence.
236. NZ_LHPI01000001_5	Vibrio hepatarius strain DSM 19134 contig0001, whole genome shotgun sequence.
237. NZ_AEVS01000051_0	Vibrio brasiliensis LMG 20546 VIBR0546_24, whole genome shotgun sequence.
238. CP014035_10	Vibrio fluvialis strain ATCC 33809 chromosome 2, complete sequence.
239. NZ_FLQZ01000119_0	Vibrio celticus strain CECT 7224, whole genome shotgun sequence.
240. CP014033_2	Vibrio fluvialis strain FDAARGOS_100 chromosome 1, complete sequence.
241. FNVG01000003_0	Vibrio hangzhouensis strain CGMCC 1.7062 genome assembly, contig: Ga0070180_103, whole genome shotgun sequence.
242. CP033577_8	Vibrio mediterranei strain 117-T6 chromosome 1, complete sequence.
243. AFWH01000073_2	Vibrio orientalis CIP 102891 = ATCC 33934 strain CIP 102891 VIOR3934_7, whole genome shotgun sequence.
244. NZ_AEVS01000014_0	Vibrio brasiliensis LMG 20546 VIBR0546_115, whole genome shotgun sequence.
245. NZ_AEVS01000081_0	Vibrio brasiliensis LMG 20546 VIBR0546_52, whole genome shotgun sequence.
246. AFWH01000012_0	Vibrio orientalis CIP 102891 = ATCC 33934 strain CIP 102891 VIOR3934_14, whole genome shotgun sequence.
247. NC_004603_10	Vibrio parahaemolyticus RIMD 2210633 chromosome 1, complete sequence.
248. NZ_AUBY01000022_0	Aliagarivorans marinus DSM 23064 G461DRAFT_scaffold00017.17_C, whole genome shotgun sequence.
249. CP014032_3	Vibrio fluvialis strain FDAARGOS_100 chromosome 2, complete sequence.
250. CP014034_6	Vibrio fluvialis strain ATCC 33809 chromosome 1, complete sequence.
Details:
>>
1. Vas1_8
Source: No definition line found.
Number of proteins with BLAST hits to this cluster: 46
MultiGeneBlast score: 46.0
Cumulative Blast bit score: 49580
Table of genes, locations, strands and annotations of subject cluster:
Vas1_1302	1395567	1396820	-	protein	no_locus_tag
Vas1_1305	1398836	1400089	-	protein	no_locus_tag
Vas1_1306	1400393	1401484	+	protein	no_locus_tag
Vas1_1307	1401957	1402715	+	protein	no_locus_tag
Vas1_1308	1402890	1404332	+	protein	no_locus_tag
Vas1_1309	1404514	1406943	-	protein	no_locus_tag
Vas1_1310	1407068	1408150	-	protein	no_locus_tag
Vas1_1311	1408543	1409871	+	protein	no_locus_tag
Vas1_1312	1409962	1412820	+	protein	no_locus_tag
Vas1_1313	1412905	1415895	+	protein	no_locus_tag
Vas1_1314	1416090	1419002	+	protein	no_locus_tag
Vas1_1315	1419506	1420615	+	protein	no_locus_tag
Vas1_1316	1421693	1422724	+	protein	no_locus_tag
Vas1_1317	1423172	1425406	-	protein	no_locus_tag
Vas1_1318	1425727	1426485	+	protein	no_locus_tag
Vas1_1319	1426727	1427998	+	protein	no_locus_tag
Vas1_1320	1428028	1428498	+	protein	no_locus_tag
Vas1_1321	1428738	1430522	-	protein	no_locus_tag
Vas1_1322	1430714	1431721	-	protein	no_locus_tag
Vas1_1323	1431740	1432756	-	protein	no_locus_tag
Vas1_1324	1432779	1434239	-	protein	no_locus_tag
Vas1_1325	1434591	1435556	+	protein	no_locus_tag
Vas1_1326	1435569	1436189	+	protein	no_locus_tag
Vas1_1327	1436204	1437292	+	protein	no_locus_tag
Vas1_1328	1437485	1440685	-	protein	no_locus_tag
Vas1_1329	1440918	1441352	+	protein	no_locus_tag
Vas1_1330	1441483	1442820	+	protein	no_locus_tag
Vas1_1331	1442887	1444206	-	protein	no_locus_tag
Vas1_1332	1444387	1445241	-	protein	no_locus_tag
Vas1_1333	1445600	1446544	+	protein	no_locus_tag
Vas1_1334	1446738	1448333	+	protein	no_locus_tag
Vas1_1335	1448550	1450028	+	protein	no_locus_tag
Vas1_1336	1450038	1451012	+	protein	no_locus_tag
Vas1_1337	1451012	1452310	+	protein	no_locus_tag
Vas1_1338	1452377	1453132	-	protein	no_locus_tag
Vas1_1339	1453450	1454808	+	protein	no_locus_tag
Vas1_1340	1455206	1455997	+	protein	no_locus_tag
Vas1_1341	1456011	1456679	+	protein	no_locus_tag
Vas1_1342	1456691	1457341	+	protein	no_locus_tag
Vas1_1343	1457463	1458056	+	protein	no_locus_tag
Vas1_1344	1458095	1458907	+	protein	no_locus_tag
Vas1_1345	1458933	1460126	+	protein	no_locus_tag
Vas1_1346	1460123	1461694	+	protein	no_locus_tag
Vas1_1347	1461691	1462920	+	protein	no_locus_tag
Vas1_1348	1462939	1464192	+	protein	no_locus_tag
Vas1_1349	1464197	1465045	+	protein	no_locus_tag
Vas1_1350	1465069	1465644	+	protein	no_locus_tag
Vas1_1351	1465647	1466174	+	protein	no_locus_tag
Vas1_1356	1469840	1470586	-	protein	no_locus_tag
Vas1_1357	1470607	1471704	-	protein	no_locus_tag
Table of Blast hits (query gene, subject gene, %identity, blast score, %coverage, e-value):
Vas1_1305_1398836-14	Vas1_1305	100	861	100	0
Vas1_1305_1398836-14	Vas1_1302	68	607	99.0408	3e-173
Vas1_1306_1400393-14	Vas1_1306	100	744	100	0
Vas1_1307_1401957-14	Vas1_1307	100	517	100	9e-147
Vas1_1307_1401957-14	Vas1_1318	72	380	98.0159	2e-105
Vas1_1308_1402890-14	Vas1_1308	100	998	100	0
Vas1_1308_1402890-14	Vas1_1335	35	281	99.1667	4e-75
Vas1_1309_1404514-14	Vas1_1309	100	1684	100	0
Vas1_1310_1407068-14	Vas1_1310	100	751	100	0
Vas1_1311_1408543-14	Vas1_1311	100	920	100	0
Vas1_1312_1409962-14	Vas1_1312	100	1971	100	0
Vas1_1312_1409962-14	Vas1_1314	48	961	102.416	0
Vas1_1312_1409962-14	Vas1_1317	41	582	76.7857	2e-165
Vas1_1312_1409962-14	Vas1_1313	34	456	96.5336	1e-127
Vas1_1313_1412905-14	Vas1_1313	100	2059	100	0
Vas1_1313_1412905-14	Vas1_1312	35	455	92.3695	3e-127
Vas1_1313_1412905-14	Vas1_1314	36	441	79.9197	6e-123
Vas1_1313_1412905-14	Vas1_1317	37	384	56.4257	7e-106
Vas1_1314_1416090-14	Vas1_1314	99	2002	100	0
Vas1_1314_1416090-14	Vas1_1312	48	961	100.515	0
Vas1_1314_1416090-14	Vas1_1317	41	599	76.9072	1e-170
Vas1_1314_1416090-14	Vas1_1313	36	440	81.6495	9e-123
Vas1_1315_1419506-14	Vas1_1315	100	758	100	0
Vas1_1316_1421693-14	Vas1_1316	100	709	100	0
Vas1_1317_1423172-14	Vas1_1317	100	1564	100	0
Vas1_1317_1423172-14	Vas1_1314	41	599	100.269	7e-171
Vas1_1317_1423172-14	Vas1_1312	41	582	98.2527	2e-165
Vas1_1317_1423172-14	Vas1_1313	37	384	75.5376	5e-106
Vas1_1318_1425727-14	Vas1_1318	100	513	100	2e-145
Vas1_1318_1425727-14	Vas1_1307	72	380	98.0159	2e-105
Vas1_1319_1426727-14	Vas1_1319	100	851	100	0
Vas1_1320_1428028-14	Vas1_1320	99	320	100	8e-88
Vas1_1321_1428738-14	Vas1_1321	100	1197	100	0
Vas1_1322_1430714-14	Vas1_1322	100	687	100	0
Vas1_1323_1431740-14	Vas1_1323	100	694	100	0
Vas1_1324_1432779-14	Vas1_1324	100	1016	100	0
Vas1_1325_1434591-14	Vas1_1325	100	660	100	0
Vas1_1326_1435569-14	Vas1_1326	100	416	100	2e-116
Vas1_1327_1436204-14	Vas1_1327	100	752	100	0
Vas1_1328_1437485-14	Vas1_1328	100	2175	100	0
Vas1_1329_1440918-14	Vas1_1329	100	297	100	6e-81
Vas1_1330_1441483-14	Vas1_1330	100	899	100	0
Vas1_1331_1442887-14	Vas1_1331	100	862	100	0
Vas1_1332_1444387-14	Vas1_1332	99	590	100	1e-168
Vas1_1333_1445600-14	Vas1_1333	100	642	100	0
Vas1_1334_1446738-14	Vas1_1334	100	1061	100	0
Vas1_1335_1448550-14	Vas1_1335	100	1017	100	0
Vas1_1335_1448550-14	Vas1_1308	35	269	96.748	1e-71
Vas1_1336_1450038-14	Vas1_1336	100	676	100	0
Vas1_1337_1451012-14	Vas1_1337	100	886	100	0
Vas1_1338_1452377-14	Vas1_1338	100	521	100	6e-148
Vas1_1339_1453450-14	Vas1_1339	100	939	100	0
Vas1_1340_1455206-14	Vas1_1340	100	532	100	3e-151
Vas1_1341_1456011-14	Vas1_1341	100	443	100	1e-124
Vas1_1341_1456011-14	Vas1_1342	33	108	82.4324	8e-24
Vas1_1342_1456691-14	Vas1_1342	100	434	100	8e-122
Vas1_1342_1456691-14	Vas1_1357	31	110	92.5926	4e-24
Vas1_1342_1456691-14	Vas1_1341	33	108	84.7222	7e-24
Vas1_1343_1457463-14	Vas1_1343	99	402	100	3e-112
Vas1_1343_1457463-14	Vas1_1356	50	201	99.4924	9e-52
Vas1_1344_1458095-14	Vas1_1344	100	556	100	2e-158
Vas1_1345_1458933-14	Vas1_1345	100	813	100	0
Vas1_1346_1460123-14	Vas1_1346	100	1088	100	0
Vas1_1347_1461691-14	Vas1_1347	100	850	100	0
Vas1_1348_1462939-14	Vas1_1348	100	863	100	0
Vas1_1349_1464197-14	Vas1_1349	99	585	100	5e-167
Vas1_1350_1465069-14	Vas1_1350	100	381	100	5e-106
Vas1_1350_1465069-14	Vas1_1351	41	136	92.1466	4e-32
>>
2. CP003241_14
Source: Vibrio sp. EJY3 chromosome 1, complete sequence.
Number of proteins with BLAST hits to this cluster: 30
MultiGeneBlast score: 30.0
Cumulative Blast bit score: 34729
Table of genes, locations, strands and annotations of subject cluster:
AEX22303	2012181	2012873	+	short-chain_dehydrogenase/reductase_SDR	VEJY3_09085
AEX22304	2013342	2014493	+	S-adenosylmethionine_synthetase	VEJY3_09090
AEX22305	2014784	2015938	+	cyclopropane_fatty_acyl_phospholipid_synthase	VEJY3_09095
AEX22306	2016439	2017386	-	IS30_family_transposase	VEJY3_09100
AEX22307	2018663	2019406	-	DNA-binding_transcriptional_repressor_MngR	VEJY3_09105
AEX22308	2019718	2021652	+	PTS_system_2-O-a-mannosyl-D-glycerate_specific transporter subunit IIABC	VEJY3_09110
AEX22309	2021809	2024448	+	alpha-mannosidase	VEJY3_09115
AEX22310	2024491	2025630	+	glycerate_kinase	VEJY3_09120
AEX22311	2025644	2026837	+	mannose-6-phosphate_isomerase	VEJY3_09125
AEX22312	2027053	2028114	-	lac_repressor	lacI
AEX22313	2028346	2030448	+	alpha-galactosidase	VEJY3_09135
AEX22314	2030581	2032302	+	putative_transporter	VEJY3_09140
AEX22315	2032517	2035432	-	agarase	VEJY3_09145
AEX22316	2035623	2038673	-	agarase	VEJY3_09150
AEX22317	2038742	2041600	-	agarase	VEJY3_09155
AEX22318	2041687	2043015	-	maltoporin	VEJY3_09160
AEX22319	2043408	2044490	+	glycosyl_transferase_family_protein	VEJY3_09165
AEX22320	2044601	2047021	+	beta-galactosidase	VEJY3_09170
AEX22321	2047310	2047612	+	hypothetical_protein	VEJY3_09175
AEX22322	2047621	2048382	-	maltose_operon_periplasmic_protein	VEJY3_09180
AEX22323	2049462	2051177	+	major_facilitator_family_transporter	VEJY3_09185
AEX22324	2052537	2052731	-	IS3_family_transposase	VEJY3_09205
AEX22325	2053486	2053782	-	transposase	VEJY3_09210
AEX22326	2054565	2055182	-	transposase	VEJY3_09215
AEX22327	2055264	2055605	-	transposase	VEJY3_09220
AEX22328	2056942	2058288	+	reverse_transcriptase-like_protein	VEJY3_09230
AEX22329	2058426	2058581	+	integrase_catalytic_subunit	VEJY3_09235
AEX22330	2058672	2060114	-	Lactaldehyde_dehydrogenase	VEJY3_09240
AEX22331	2060296	2061051	-	Uxu_operon_transcriptional_regulator	VEJY3_09245
AEX22332	2061559	2062650	-	ABC_transporter_ATP-binding_protein	VEJY3_09250
AEX22333	2062954	2064207	+	ABC_sugar_transporter,_periplasmic_ligand binding protein	VEJY3_09255
AEX22334	2064372	2065142	+	ABC_sugar_transporter,_inner_membrane_subunit	VEJY3_09260
AEX22335	2065142	2066041	+	ABC_sugar_transporter,_inner_membrane_subunit	VEJY3_09265
AEX22336	2066233	2067486	+	ABC_sugar_transporter,_periplasmic_ligand binding protein	VEJY3_09270
AEX22337	2067582	2068238	-	hypothetical_protein	VEJY3_09275
AEX22338	2068265	2071453	+	Ig_domain-containing_protein_group_2 domain-containing protein	VEJY3_09280
AEX22339	2071748	2072599	-	integrase	VEJY3_09285
AEX22340	2072614	2072898	-	transposase	VEJY3_09290
AEX22341	2073217	2073417	+	hypothetical_protein	VEJY3_09295
AEX22342	2073895	2075193	-	enolase	eno
AEX22343	2075190	2076167	-	aminoglycoside_phosphotransferase	VEJY3_09305
AEX22344	2076177	2077655	-	aldehyde_dehydrogenase	VEJY3_09310
AEX22345	2077681	2078883	-	hypothetical_protein	VEJY3_09315
AEX22346	2078964	2080559	-	putative_transporter	VEJY3_09320
AEX22347	2080690	2081508	-	class_II_fructose-1,6-bisphosphate_aldolase	VEJY3_09325
AEX22348	2081492	2082436	-	PfkB_domain-containing_protein	VEJY3_09330
AEX22349	2082436	2083944	-	L-fucose_isomerase-like_protein	VEJY3_09335
AEX22350	2084132	2084986	+	AraC_family_transcriptional_regulator	VEJY3_09340
AEX22351	2085129	2086481	+	hypothetical_protein	VEJY3_09345
AEX22352	2086690	2087118	+	deaminase-reductase_domain-containing_protein	VEJY3_09350
AEX22353	2087277	2087723	+	hypothetical_protein	VEJY3_09355
AEX22354	2087776	2088696	-	hypothetical_protein	VEJY3_09360
AEX22355	2089028	2089246	-	glyoxalase	VEJY3_09365
AEX22356	2089328	2090416	-	mandelate_racemase	VEJY3_09370
AEX22357	2090431	2091051	-	keto-hydroxyglutarate-aldolase/keto-deoxy- phosphogluconate aldolase	VEJY3_09375
AEX22358	2091063	2092028	-	PfkB_domain-containing_protein	VEJY3_09380
AEX22359	2092404	2093864	+	D-mannonate_oxidoreductase	VEJY3_09385
AEX22360	2093887	2094903	+	hypothetical_protein	VEJY3_09390
AEX22361	2094922	2095929	+	ureidoglycolate_dehydrogenase	VEJY3_09395
AEX22362	2096122	2097906	+	hypothetical_protein	VEJY3_09400
AEX22363	2098721	2098834	+	IS3_family_element,_transposase_OrfB	VEJY3_09405
AEX22364	2098831	2099217	+	integrase_catalytic_subunit	VEJY3_09410
AEX22365	2099422	2099892	-	mannitol_dehydrogenase	VEJY3_09415
AEX22366	2100266	2101021	-	Uxu_operon_transcriptional_regulator	VEJY3_09420
AEX22367	2101324	2103558	+	agarase	VEJY3_09425
AEX22368	2103792	2104145	-	transposase	VEJY3_09430
AEX22369	2104387	2104662	-	hypothetical_protein	VEJY3_09435
AEX22370	2105047	2105349	+	hypothetical_protein	VEJY3_09440
AEX22371	2105477	2105605	+	integrase,_catalytic_region	VEJY3_09445
AEX22372	2106483	2106683	+	transcriptional_repressor_RbsR	VEJY3_09450
AEX22373	2106748	2107812	-	aldose_1-epimerase	VEJY3_09455
AEX22374	2107822	2108982	-	galactokinase	VEJY3_09460
AEX22375	2110214	2111224	-	UDP-glucose_4-epimerase	VEJY3_09475
AEX22376	2112040	2112441	+	transposase_IS116/IS110/IS902_family_protein	VEJY3_09480
AEX22377	2113824	2114030	+	diguanylate_cyclase_and_metal_dependent phosphohydrolase	VEJY3_09485
AEX22378	2114300	2114800	-	hypothetical_protein	VEJY3_09490
AEX22379	2115180	2115887	-	dipeptidase	VEJY3_09495
AEX22380	2115899	2116546	-	hypothetical_protein	VEJY3_09500
AEX22381	2116830	2117120	-	transcriptional_regulator	VEJY3_09505
AEX22382	2117918	2118670	+	chromosome_segregation_ATPase	VEJY3_09510
AEX22383	2118759	2120264	+	type_IV_secretory_pathway,_VirD2_component	VEJY3_09515
AEX22384	2120500	2120778	+	hypothetical_protein	VEJY3_09520
AEX22385	2120896	2121150	+	transcriptional_regulator	VEJY3_09525
AEX22386	2121516	2123285	-	putative_transporter	VEJY3_09530
AEX22387	2123401	2125503	-	alpha-galactosidase	VEJY3_09535
AEX22388	2125746	2126831	+	lac_repressor	VEJY3_09540
AEX22389	2127078	2128607	-	chromosome_segregation_ATPase	VEJY3_09545
AEX22390	2129017	2129457	-	hypothetical_protein	VEJY3_09550
AEX22391	2129685	2130017	-	ATP-dependent_carboxylate-amine_ligase domain-containing protein	VEJY3_09555
AEX22392	2130002	2130334	-	hypothetical_protein	VEJY3_09560
AEX22393	2130721	2130954	-	hypothetical_protein	VEJY3_09565
AEX22394	2130983	2133601	-	hypothetical_protein	VEJY3_09570
AEX22395	2133937	2134158	-	transposase	VEJY3_09575
AEX22396	2134386	2134580	-	transposase	VEJY3_09580
AEX22397	2135656	2136432	-	ISCps1,_transposase	VEJY3_09585
AEX22398	2137231	2139294	-	hypothetical_protein	VEJY3_09590
AEX22399	2139276	2142848	-	hypothetical_protein	VEJY3_09595
AEX22400	2142965	2143819	+	hypothetical_protein	VEJY3_09600
AEX22401	2144387	2144527	-	hypothetical_protein	VEJY3_09605
AEX22402	2145052	2146356	-	hypothetical_protein	VEJY3_09610
AEX22403	2146505	2147119	-	hypothetical_protein	VEJY3_09615
AEX22404	2147211	2147387	-	hypothetical_protein	VEJY3_09620
AEX22405	2147342	2147584	-	hypothetical_protein	VEJY3_09625
AEX22406	2147673	2147765	-	hypothetical_protein	VEJY3_09630
AEX22407	2147780	2148442	-	hypothetical_protein	VEJY3_09635
AEX22408	2148582	2149136	-	hypothetical_protein	VEJY3_09640
AEX22409	2149277	2149636	-	hypothetical_protein	VEJY3_09645
AEX22410	2149681	2149815	-	hypothetical_protein	VEJY3_09650
AEX22411	2149788	2150282	-	hypothetical_protein	VEJY3_09655
AEX22412	2150904	2151350	-	hypothetical_protein	VEJY3_09660
AEX22413	2151970	2152350	-	hypothetical_protein	VEJY3_09665
AEX22414	2152378	2152521	-	hypothetical_protein	VEJY3_09670
AEX22415	2153177	2154079	+	site-specific_recombinase_IntIA	VEJY3_09675
AEX22416	2154374	2156281	+	acyltransferase	VEJY3_09680
Table of Blast hits (query gene, subject gene, %identity, blast score, %coverage, e-value):
Vas1_1305_1398836-14	AEX22333	94	820	100	0
Vas1_1305_1398836-14	AEX22336	67	605	99.0408	5e-173
Vas1_1306_1400393-14	AEX22332	92	697	100	0
Vas1_1307_1401957-14	AEX22331	84	436	97.619	3e-122
Vas1_1307_1401957-14	AEX22366	73	383	97.2222	3e-106
Vas1_1308_1402890-14	AEX22330	94	913	99.7917	0
Vas1_1308_1402890-14	AEX22344	35	271	99.1667	2e-72
Vas1_1309_1404514-14	AEX22320	58	993	100	0
Vas1_1310_1407068-14	AEX22319	93	706	100	0
Vas1_1311_1408543-14	AEX22318	95	892	100	0
Vas1_1312_1409962-14	AEX22317	92	1855	100	0
Vas1_1312_1409962-14	AEX22315	49	966	102.101	0
Vas1_1312_1409962-14	AEX22367	41	559	76.8908	1e-158
Vas1_1312_1409962-14	AEX22316	35	466	97.2689	1e-130
Vas1_1313_1412905-14	AEX22316	76	1554	102.51	0
Vas1_1313_1412905-14	AEX22317	35	467	95.4819	8e-131
Vas1_1313_1412905-14	AEX22315	36	435	79.2169	3e-121
Vas1_1313_1412905-14	AEX22367	37	377	56.5261	7e-104
Vas1_1314_1416090-14	AEX22315	90	1853	100	0
Vas1_1314_1416090-14	AEX22317	48	965	100.928	0
Vas1_1314_1416090-14	AEX22367	40	592	76.9072	1e-168
Vas1_1314_1416090-14	AEX22316	37	441	81.6495	6e-123
Vas1_1316_1421693-14	AEX22397	40	162	74.9271	9e-40
Vas1_1316_1421693-14	AEX22376	61	149	39.0671	2e-35
Vas1_1316_1421693-14	AEX22327	40	74	27.6968	3e-13
Vas1_1317_1423172-14	AEX22367	86	1377	100	0
Vas1_1317_1423172-14	AEX22315	40	592	100.269	2e-168
Vas1_1317_1423172-14	AEX22317	42	587	98.6559	5e-167
Vas1_1317_1423172-14	AEX22316	33	378	94.8925	4e-104
Vas1_1318_1425727-14	AEX22366	90	466	99.2063	2e-131
Vas1_1318_1425727-14	AEX22331	70	377	98.8095	2e-104
Vas1_1320_1428028-14	AEX22365	70	229	100	2e-60
Vas1_1321_1428738-14	AEX22362	82	988	99.8316	0
Vas1_1322_1430714-14	AEX22361	94	660	100	0
Vas1_1323_1431740-14	AEX22360	94	633	100	0
Vas1_1324_1432779-14	AEX22359	88	917	100	0
Vas1_1325_1434591-14	AEX22358	89	597	100	1e-170
Vas1_1326_1435569-14	AEX22357	93	391	100	7e-109
Vas1_1327_1436204-14	AEX22356	97	700	100	0
Vas1_1328_1437485-14	AEX22338	77	1714	99.4371	0
Vas1_1329_1440918-14	AEX22337	59	183	98.6111	1e-46
Vas1_1331_1442887-14	AEX22351	85	759	99.7722	0
Vas1_1332_1444387-14	AEX22350	84	515	100	6e-146
Vas1_1333_1445600-14	AEX22348	77	486	100	4e-137
Vas1_1334_1446738-14	AEX22346	95	1020	100	0
Vas1_1334_1446738-14	AEX22314	51	547	98.6817	3e-155
Vas1_1334_1446738-14	AEX22386	45	481	100.188	2e-135
Vas1_1335_1448550-14	AEX22344	89	933	100	0
Vas1_1335_1448550-14	AEX22330	35	270	96.748	7e-72
Vas1_1336_1450038-14	AEX22343	78	534	100	1e-151
Vas1_1337_1451012-14	AEX22342	85	764	99.537	0
>>
3. BBMQ01000089_0
Source: Vibrio sp. C7 DNA, contig: contig00048, strain: JCM 19233, whole genome shotgun sequence.
Number of proteins with BLAST hits to this cluster: 24
MultiGeneBlast score: 24.0
Cumulative Blast bit score: 16982
Table of genes, locations, strands and annotations of subject cluster:
GAL11177	930	2201	-	aldehyde_dehydrogenase	JCM19233_2163
GAL11178	2162	2302	-	hypothetical_protein	JCM19233_2164
GAL11179	2619	2957	-	predicted_sodium-dependent_galactose transporter	JCM19233_2165
GAL11180	2927	3436	-	sodium/myo-inositol_cotransporter	JCM19233_2166
GAL11181	3453	4211	-	predicted_sodium-dependent_galactose transporter	JCM19233_2167
GAL11182	4405	4614	-	hypothetical_protein	JCM19233_2168
GAL11183	4682	5347	-	uncharacterized_sugar_kinase_YdjH	JCM19233_2169
GAL11184	5681	6559	+	transcriptional_regulator_AraC_family	JCM19233_2170
GAL11185	6862	7134	+	Na+_driven_multidrug_efflux_pump	JCM19233_2171
GAL11186	7196	8059	+	Na+_driven_multidrug_efflux_pump	JCM19233_2172
GAL11187	8126	8281	-	hypothetical_protein	JCM19233_2173
GAL11188	8275	8436	-	hypothetical_protein	JCM19233_2174
GAL11189	8417	8950	-	MATE_family_of_MDR_efflux_pumps	JCM19233_2175
GAL11190	9015	9461	-	MATE_family_of_MDR_efflux_pumps	JCM19233_2176
GAL11191	9592	9897	-	hypothetical_protein	JCM19233_2177
GAL11192	10082	10198	-	hypothetical_protein	JCM19233_2178
GAL11193	10259	11011	+	integrins_alpha_chain:ASPIC/UnbV_precursor	JCM19233_2179
GAL11194	10971	11861	+	hypothetical_protein	JCM19233_2180
GAL11195	11858	13459	+	hypothetical_protein	JCM19233_2181
GAL11196	13529	13657	+	hypothetical_protein	JCM19233_2182
GAL11197	13654	14742	-	muconolactone_isomerase_putative	JCM19233_2183
GAL11198	14757	15377	-	4-hydroxy-2-oxoglutarate_aldolase	JCM19233_2184
GAL11199	15390	16355	-	2-dehydro-3-deoxygluconate_kinase	JCM19233_2185
GAL11200	16707	18104	+	D-mannonate_oxidoreductase	JCM19233_2186
GAL11201	18189	18947	+	sorbitol_dehydrogenase	JCM19233_2187
GAL11202	18910	19203	+	sorbitol_dehydrogenase	JCM19233_2188
GAL11203	19222	20229	+	malate_dehydrogenase	JCM19233_2189
GAL11204	20421	21098	+	methyl-accepting_chemotaxis_protein_II	JCM19233_2190
GAL11205	21116	22204	+	methyl-accepting_chemotaxis_protein	JCM19233_2191
GAL11206	22437	22907	-	protein_yjgK	JCM19233_2192
GAL11207	22937	23488	-	lactose_permease	JCM19233_2193
GAL11208	23527	24207	-	sucrose_permease_major_facilitator_superfamily	JCM19233_2194
GAL11209	24445	25203	-	hexuronate_utilization_operon_transcriptional repressor ExuR	JCM19233_2195
GAL11210	25748	26761	+	agarase	JCM19233_2196
GAL11211	26725	27759	+	agarase	JCM19233_2197
GAL11212	28755	29333	-	transcriptional_regulator_LysR_family	JCM19233_2198
GAL11213	29511	29642	-	hypothetical_protein	JCM19233_2199
GAL11214	29768	30661	+	metabolite_transporter_(DMT)_superfamily	JCM19233_2200
Table of Blast hits (query gene, subject gene, %identity, blast score, %coverage, e-value):
Vas1_1307_1401957-14	GAL11209	72	380	98.0159	2e-105
Vas1_1308_1402890-14	GAL11177	36	253	86.875	9e-67
Vas1_1312_1409962-14	GAL11211	49	370	36.8697	8e-102
Vas1_1312_1409962-14	GAL11210	32	159	30.9874	3e-38
Vas1_1313_1412905-14	GAL11211	43	305	35.743	6e-82
Vas1_1313_1412905-14	GAL11210	33	67	10.6426	3e-10
Vas1_1314_1416090-14	GAL11211	50	388	35.6701	4e-107
Vas1_1314_1416090-14	GAL11210	31	154	31.7526	1e-36
Vas1_1317_1423172-14	GAL11211	98	713	45.9677	0
Vas1_1317_1423172-14	GAL11210	98	597	38.5753	3e-170
Vas1_1318_1425727-14	GAL11209	100	513	100	2e-145
Vas1_1319_1426727-14	GAL11208	95	422	51.773	1e-117
Vas1_1319_1426727-14	GAL11207	98	363	43.2624	4e-100
Vas1_1320_1428028-14	GAL11206	98	319	100	2e-87
Vas1_1321_1428738-14	GAL11205	98	705	60.9428	0
Vas1_1321_1428738-14	GAL11204	99	351	28.7879	3e-96
Vas1_1322_1430714-14	GAL11203	99	685	100	0
Vas1_1323_1431740-14	GAL11201	96	485	72.1893	7e-137
Vas1_1323_1431740-14	GAL11202	100	204	28.6982	3e-52
Vas1_1324_1432779-14	GAL11200	99	936	92.7984	0
Vas1_1325_1434591-14	GAL11199	99	658	100	0
Vas1_1326_1435569-14	GAL11198	99	412	100	2e-115
Vas1_1327_1436204-14	GAL11197	99	749	100	0
Vas1_1328_1437485-14	GAL11195	98	1076	50	0
Vas1_1328_1437485-14	GAL11194	99	556	25.3283	1e-157
Vas1_1328_1437485-14	GAL11193	98	508	23.3583	3e-143
Vas1_1329_1440918-14	GAL11191	98	201	70.1389	4e-52
Vas1_1330_1441483-14	GAL11189	96	334	38.427	3e-91
Vas1_1330_1441483-14	GAL11190	97	290	32.3596	5e-78
Vas1_1330_1441483-14	GAL11187	92	102	11.4607	2e-21
Vas1_1330_1441483-14	GAL11188	97	89	9.88764	2e-17
Vas1_1331_1442887-14	GAL11186	97	559	65.3759	4e-159
Vas1_1331_1442887-14	GAL11185	94	160	20.0456	4e-39
Vas1_1332_1444387-14	GAL11184	100	592	100	4e-169
Vas1_1333_1445600-14	GAL11183	91	329	61.1465	7e-90
Vas1_1333_1445600-14	GAL11182	95	135	21.9745	1e-31
Vas1_1334_1446738-14	GAL11181	99	492	46.7043	9e-139
Vas1_1334_1446738-14	GAL11180	99	285	26.9303	3e-76
Vas1_1334_1446738-14	GAL11179	100	226	21.0923	1e-58
Vas1_1335_1448550-14	GAL11177	99	860	85.3659	0
>>
4. NZ_CP013021_17
Source: Agarivorans gilvus strain WH0801, complete genome.
Number of proteins with BLAST hits to this cluster: 21
MultiGeneBlast score: 21.0
Cumulative Blast bit score: 15874
Table of genes, locations, strands and annotations of subject cluster:
WP_055733215	2396924	2397160	-	hypothetical_protein	AR383_RS11180
WP_055733216	2397172	2397561	-	SirB2_family_protein	AR383_RS11185
WP_055733217	2398212	2398523	+	DUF1820_family_protein	AR383_RS11190
WP_055733218	2398520	2398834	+	hypothetical_protein	AR383_RS11195
WP_083481576	2398912	2399235	-	YdbL_family_protein	AR383_RS11200
WP_055733220	2399245	2399433	-	YnbE_family_lipoprotein	AR383_RS11205
WP_055733221	2399397	2401157	-	hypothetical_protein	AR383_RS11210
WP_055733222	2401341	2401709	+	DUF2500_family_protein	AR383_RS11215
WP_083481577	2401656	2402639	-	DMT_family_transporter	AR383_RS11220
WP_055733224	2402714	2403169	+	DUF2214_family_protein	AR383_RS11225
WP_055733225	2403218	2404237	+	alpha/beta_fold_hydrolase	AR383_RS11230
WP_055733226	2404271	2405065	+	Cof-type_HAD-IIB_family_hydrolase	AR383_RS11235
WP_055733227	2405083	2406612	+	hypothetical_protein	AR383_RS11240
WP_055733228	2406683	2407870	+	NAD(P)/FAD-dependent_oxidoreductase	AR383_RS11245
WP_055733229	2407993	2408817	+	heteromeric_transposase_endonuclease_subunit TnsA	AR383_RS11250
WP_055733230	2408807	2410966	+	DDE-type_integrase/transposase/recombinase	AR383_RS11255
WP_055733231	2410956	2412407	+	ATP-binding_protein	AR383_RS11260
WP_055733232	2412442	2413836	+	transposase	AR383_RS11265
WP_055733233	2414403	2415581	+	hypothetical_protein	AR383_RS11270
AR383_RS11275	2415725	2416561	+	DDE-type_integrase/transposase/recombinase	no_locus_tag
WP_055733235	2416819	2420166	+	hypothetical_protein	AR383_RS11280
WP_055733236	2420358	2421275	+	hypothetical_protein	AR383_RS11285
WP_055733237	2421686	2422156	-	YhcH/YjgK/YiaL_family_protein	AR383_RS11290
WP_083481578	2422177	2423667	-	methyl-accepting_chemotaxis_protein	AR383_RS11295
WP_157051711	2423673	2424077	-	hypothetical_protein	AR383_RS11300
WP_157051712	2424163	2424528	-	hypothetical_protein	AR383_RS11305
WP_055733241	2424555	2424956	-	hypothetical_protein	AR383_RS11310
WP_157051713	2425015	2426244	-	hypothetical_protein	AR383_RS21525
WP_157051714	2426163	2428127	-	hypothetical_protein	AR383_RS21530
WP_055733242	2428182	2431049	-	beta-agarase	AR383_RS11320
WP_055733243	2431116	2432501	-	hypothetical_protein	AR383_RS11325
WP_055733244	2432541	2433806	-	oligosaccharide_MFS_transporter	AR383_RS11330
WP_055733245	2434187	2435272	+	family_43_glycosylhydrolase	AR383_RS11335
WP_083481579	2435367	2437775	+	glycoside_hydrolase_family_2_protein	AR383_RS11340
WP_055733246	2437955	2439328	+	beta-agarase	AR383_RS11345
AR383_RS11350	2439383	2441604	-	agarase	no_locus_tag
WP_055733247	2441854	2443386	+	MFS_transporter	AR383_RS11355
WP_083481580	2443797	2444441	-	AbiV_family_abortive_infection_protein	AR383_RS11360
WP_055733249	2444565	2445596	+	hypothetical_protein	AR383_RS11365
WP_055733250	2445598	2446062	+	hypothetical_protein	AR383_RS11370
WP_055733251	2447110	2448372	-	Y-family_DNA_polymerase	AR383_RS11375
WP_055733252	2448372	2448779	-	DNA_polymerase_V	AR383_RS11380
WP_055733253	2449033	2449770	+	DNA/RNA_non-specific_endonuclease	AR383_RS11385
WP_055733254	2449995	2451275	-	HNH_endonuclease	AR383_RS11390
WP_055733255	2451909	2452214	-	hypothetical_protein	AR383_RS11395
WP_055733256	2452768	2453076	-	hypothetical_protein	AR383_RS11400
WP_055733257	2453127	2453441	-	hypothetical_protein	AR383_RS11405
WP_055733258	2453858	2454880	-	tryptophan--tRNA_ligase	trpS
WP_055733259	2455720	2456727	-	Ldh_family_oxidoreductase	AR383_RS11415
WP_055733260	2456744	2457760	-	zinc-binding_alcohol_dehydrogenase_family protein	AR383_RS11420
WP_055733261	2457771	2459240	-	mannitol_dehydrogenase_family_protein	AR383_RS11425
WP_055733263	2459575	2460513	+	sugar_kinase	AR383_RS11435
WP_055733264	2460526	2461152	+	bifunctional_4-hydroxy-2-oxoglutarate	eda
AR383_RS11445	2461164	2462254	+	uroporphyrinogen_decarboxylase	no_locus_tag
WP_157051715	2462512	2464962	+	beta-agarase	AR383_RS11450
WP_157051716	2464959	2465339	+	hypothetical_protein	AR383_RS21535
WP_055733265	2465820	2467268	-	aldehyde_dehydrogenase	aldA
WP_055735027	2467581	2468360	+	GntR_family_transcriptional_regulator	AR383_RS11460
WP_055735028	2469037	2470410	-	PLP-dependent_aminotransferase_family_protein	AR383_RS11465
WP_055733266	2470512	2471414	+	EamA_family_transporter	AR383_RS11470
WP_055733267	2471718	2473355	+	hypothetical_protein	AR383_RS11475
WP_055733268	2473689	2473937	+	hypothetical_protein	AR383_RS11480
WP_055733269	2473974	2474477	+	hypothetical_protein	AR383_RS11485
AR383_RS11490	2474428	2474739	+	hypothetical_protein	no_locus_tag
WP_055735029	2474847	2475848	+	AI-2E_family_transporter	AR383_RS11495
WP_055733271	2475923	2476450	-	NAD(P)H-dependent_oxidoreductase	AR383_RS11500
WP_055733272	2476605	2477084	-	hypothetical_protein	AR383_RS11505
WP_083481581	2477640	2477984	+	DUF3316_domain-containing_protein	AR383_RS11510
WP_055733274	2478036	2478374	+	DUF3316_domain-containing_protein	AR383_RS11515
WP_055733275	2478565	2478981	-	hypothetical_protein	AR383_RS11520
WP_083481582	2478991	2479353	-	DUF882_domain-containing_protein	AR383_RS11525
AR383_RS11530	2479379	2479621	-	hypothetical_protein	no_locus_tag
AR383_RS21265	2479662	2480579	-	IS5_family_transposase	no_locus_tag
WP_157051717	2480856	2481281	-	hypothetical_protein	AR383_RS11540
WP_083481583	2481329	2482567	-	RHS_repeat-associated_core_domain-containing protein	AR383_RS11545
WP_055733280	2482845	2483294	-	DUF1311_domain-containing_protein	AR383_RS11550
WP_083481584	2483296	2483619	-	lysozyme	AR383_RS11555
AR383_RS21270	2483695	2484613	-	IS5_family_transposase	no_locus_tag
WP_083481585	2484679	2484867	-	hypothetical_protein	AR383_RS21275
WP_055733282	2485179	2485676	-	hypothetical_protein	AR383_RS11565
WP_157051835	2485673	2486248	-	peptidoglycan_DD-metalloendopeptidase_family protein	AR383_RS11570
WP_055733284	2486577	2486963	-	hypothetical_protein	AR383_RS11575
WP_157051836	2486973	2487860	-	hypothetical_protein	AR383_RS21280
WP_055733286	2488321	2489238	+	IS5_family_transposase	AR383_RS11585
Table of Blast hits (query gene, subject gene, %identity, blast score, %coverage, e-value):
Vas1_1307_1401957-14	WP_055735027	70	369	98.8095	3e-102
Vas1_1308_1402890-14	WP_055733265	46	461	99.375	2e-129
Vas1_1309_1404514-14	WP_083481579	48	793	98.7639	0
Vas1_1310_1407068-14	WP_055733245	81	631	100.278	0
Vas1_1311_1408543-14	WP_055733243	35	253	106.561	5e-67
Vas1_1312_1409962-14	WP_055733242	65	1332	100.21	0
Vas1_1312_1409962-14	WP_157051715	49	823	85.5042	0
Vas1_1312_1409962-14	WP_157051713	44	220	30.4622	1e-56
Vas1_1312_1409962-14	WP_157051716	57	166	13.7605	4e-40
Vas1_1312_1409962-14	AR383_RS11350	36	162	27.7311	3e-39
Vas1_1313_1412905-14	WP_055733242	38	496	89.257	1e-139
Vas1_1313_1412905-14	WP_157051714	39	393	64.8594	1e-108
Vas1_1313_1412905-14	WP_157051713	49	310	36.3454	2e-83
Vas1_1313_1412905-14	WP_157051716	54	143	12.5502	2e-33
Vas1_1313_1412905-14	AR383_RS11350	32	56	11.6466	5e-07
Vas1_1314_1416090-14	WP_055733242	49	996	100.928	0
Vas1_1314_1416090-14	WP_157051715	40	656	86.4948	0
Vas1_1314_1416090-14	WP_157051713	44	220	28.7629	1e-56
Vas1_1314_1416090-14	WP_157051716	56	168	12.8866	7e-41
Vas1_1314_1416090-14	AR383_RS11350	32	138	25.6701	6e-32
Vas1_1317_1423172-14	WP_055733242	41	584	94.8925	2e-166
Vas1_1317_1423172-14	WP_157051715	37	376	76.7473	1e-103
Vas1_1317_1423172-14	AR383_RS11350	58	358	40.9946	2e-98
Vas1_1317_1423172-14	WP_157051713	45	241	42.0699	6e-63
Vas1_1317_1423172-14	WP_157051716	47	142	16.9355	3e-33
Vas1_1318_1425727-14	WP_055735027	69	378	100	8e-105
Vas1_1319_1426727-14	WP_055733244	81	707	100	0
Vas1_1320_1428028-14	WP_055733237	38	120	98.0769	9e-28
Vas1_1322_1430714-14	WP_055733259	74	527	100	2e-149
Vas1_1323_1431740-14	WP_055733260	76	525	100	5e-149
Vas1_1324_1432779-14	WP_055733261	62	637	98.1481	0
Vas1_1325_1434591-14	WP_055733263	73	469	95.6386	5e-132
Vas1_1326_1435569-14	WP_055733264	72	307	96.6019	1e-83
Vas1_1327_1436204-14	AR383_RS11445	79	139	27.3481	8e-33
Vas1_1328_1437485-14	WP_055733235	38	667	103.94	0
Vas1_1335_1448550-14	WP_055733265	33	238	96.3415	3e-62
Vas1_1339_1453450-14	WP_055733246	72	673	97.1239	0
>>
5. BARX01000027_0
Source: Agarivorans albus MKT 106 DNA, contig: contig00027, whole genome shotgun sequence.
Number of proteins with BLAST hits to this cluster: 20
MultiGeneBlast score: 20.0
Cumulative Blast bit score: 19095
Table of genes, locations, strands and annotations of subject cluster:
GAD03397	1385	2116	-	hypothetical_protein	AALB_3477
GAD03398	2338	2790	-	hypothetical_protein	AALB_3478
GAD03399	3423	6308	-	glycine_dehydrogenase	AALB_3479
GAD03400	6420	6812	-	glycine_cleavage_system_H_protein	AALB_3480
GAD03401	6891	7982	-	aminomethyltransferase	AALB_3481
GAD03402	8794	9432	+	hypothetical_protein	AALB_3482
GAD03403	10115	11323	-	2-octaprenyl-3-methyl-6-methoxy-1,4-benzoquinol hydroxylase	AALB_3483
GAD03404	11343	12563	-	2-octaprenyl-6-methoxyphenol_hydroxylase	AALB_3484
GAD03405	12565	13860	-	xaa-Pro_aminopeptidase	AALB_3485
GAD03406	13885	14451	-	putative_conserved_exported_protein_precursor	AALB_3486
GAD03407	14544	15149	-	hypothetical_protein	AALB_3487
GAD03408	15419	15733	+	Z-ring-associated_protein_ZapA	AALB_3488
GAD03409	16242	16355	-	hypothetical_protein	AALB_3489
GAD03410	17146	17382	-	hypothetical_protein	AALB_3490
GAD03411	17492	17644	-	hypothetical_protein	AALB_3491
GAD03412	17956	19137	+	hypothetical_protein	AALB_3492
GAD03413	19170	20156	+	autolysin_sensor_kinase	AALB_3493
GAD03414	20144	20893	+	response_regulator	AALB_3494
GAD03415	20966	22669	-	sodium-Choline_Symporter	AALB_3495
GAD03416	22738	24840	-	alpha-galactosidase	AALB_3496
GAD03417	25106	26164	+	transcriptional_repressor_of_the_lac_operon	AALB_3497
GAD03418	26179	26499	-	hypothetical_protein	AALB_3498
GAD03419	26717	27520	+	hypothetical_protein	AALB_3499
GAD03420	27987	28103	-	hypothetical_protein	AALB_3500
GAD03421	28214	28870	-	hypothetical_protein	AALB_3501
GAD03422	29032	29496	+	predicted_redox_protein	AALB_3502
GAD03423	29975	30130	-	hypothetical_protein	AALB_3503
GAD03424	30513	31133	-	hypothetical_protein	AALB_3504
GAD03425	31639	32268	+	hypothetical_protein	AALB_3505
GAD03426	32278	32964	+	ATP-binding_protein	AALB_3506
GAD03427	32952	34166	+	lipoprotein_releasing_system_transmembrane protein LolC	AALB_3507
GAD03428	34159	34902	+	hypothetical_protein	AALB_3508
GAD03429	35104	35823	+	hypothetical_protein	AALB_3509
GAD03430	35983	36567	+	5-formyltetrahydrofolate_cyclo-ligase	AALB_3510
GAD03431	36545	36658	-	hypothetical_protein	AALB_3511
GAD03432	36704	37357	+	ribose_5-phosphate_isomerase_A	AALB_3512
GAD03433	37613	38842	+	D-3-phosphoglycerate_dehydrogenase	AALB_3513
GAD03434	38914	39204	-	hypothetical_protein	AALB_3514
GAD03435	39338	40273	+	transcriptional_regulator	AALB_3515
GAD03436	40519	40647	+	hypothetical_protein	AALB_3516
GAD03437	40836	41624	+	hypothetical_protein	AALB_3517
GAD03438	42051	44324	-	agarase	AALB_3518
GAD03439	44807	45268	-	putative_mannitol_dehydrogenase	AALB_3519
GAD03440	45299	46777	-	hypothetical_protein	AALB_3520
GAD03441	46796	47647	-	hypothetical_protein	AALB_3521
GAD03442	47682	48083	-	hypothetical_protein	AALB_3522
GAD03443	48148	51135	-	hypothetical_protein	AALB_3523
GAD03444	51210	54065	-	agarase	AALB_3524
GAD03445	54146	55555	-	hypothetical_maltoporin	AALB_3525
GAD03446	55599	56867	-	lactose_permease	AALB_3526
GAD03447	57038	57163	+	hypothetical_protein	AALB_3527
GAD03448	57307	58389	+	hypothetical_protein	AALB_3528
GAD03449	58477	60948	+	beta-galactosidase	AALB_3529
GAD03450	61001	61978	-	galR-LacI_family_of_transcriptional_regulators	AALB_3530
GAD03451	62074	65007	-	agarase	AALB_3531
GAD03452	65320	66327	-	malate_dehydrogenase	AALB_3532
GAD03453	66342	67358	-	sorbitol_dehydrogenase	AALB_3533
GAD03454	67368	68840	-	D-mannonate_oxidoreductase	AALB_3534
GAD03455	69182	70111	+	2-dehydro-3-deoxygluconate_kinase	AALB_3535
GAD03456	70140	70769	+	4-Hydroxy-2-oxoglutarate_aldolase_/ 2-dehydro-3-deoxyphosphogluconate aldolase	AALB_3536
GAD03457	70780	71871	+	muconolactone_isomerase,putative	AALB_3537
GAD03458	72125	73744	+	D-xylose_proton-symporter_XylE	AALB_3538
GAD03459	73818	74597	-	hexuronate_utilization_operon_transcriptional repressor ExuR	AALB_3539
GAD03460	74941	76410	+	aldehyde_dehydrogenase_A	AALB_3540
Table of Blast hits (query gene, subject gene, %identity, blast score, %coverage, e-value):
Vas1_1307_1401957-14	GAD03459	73	388	98.0159	9e-108
Vas1_1308_1402890-14	GAD03460	44	478	99.1667	2e-134
Vas1_1309_1404514-14	GAD03449	50	848	99.8764	0
Vas1_1310_1407068-14	GAD03448	80	620	100	1e-177
Vas1_1311_1408543-14	GAD03445	34	248	108.824	3e-65
Vas1_1312_1409962-14	GAD03444	65	1301	100.105	0
Vas1_1312_1409962-14	GAD03451	50	1003	102.731	0
Vas1_1312_1409962-14	GAD03438	41	568	74.3697	3e-161
Vas1_1312_1409962-14	GAD03443	34	437	98.1092	9e-122
Vas1_1313_1412905-14	GAD03443	48	822	94.6787	0
Vas1_1313_1412905-14	GAD03444	36	474	93.6747	7e-133
Vas1_1313_1412905-14	GAD03451	35	457	91.9679	6e-128
Vas1_1313_1412905-14	GAD03438	33	386	77.8112	1e-106
Vas1_1314_1416090-14	GAD03451	58	1236	100.722	0
Vas1_1314_1416090-14	GAD03444	49	977	100.825	0
Vas1_1314_1416090-14	GAD03438	41	589	78.9691	1e-167
Vas1_1314_1416090-14	GAD03443	33	414	93.7113	9e-115
Vas1_1317_1423172-14	GAD03438	67	1081	100	0
Vas1_1317_1423172-14	GAD03444	41	594	101.747	2e-169
Vas1_1317_1423172-14	GAD03451	41	587	95.9677	4e-167
Vas1_1317_1423172-14	GAD03443	36	364	94.2204	5e-100
Vas1_1318_1425727-14	GAD03459	78	418	99.2063	6e-117
Vas1_1319_1426727-14	GAD03446	82	720	100	0
Vas1_1320_1428028-14	GAD03439	55	173	99.359	1e-43
Vas1_1322_1430714-14	GAD03452	79	561	100	9e-160
Vas1_1323_1431740-14	GAD03453	75	516	100	4e-146
Vas1_1324_1432779-14	GAD03454	66	662	97.3251	0
Vas1_1325_1434591-14	GAD03455	73	473	95.9502	3e-133
Vas1_1326_1435569-14	GAD03456	78	332	98.5437	4e-91
Vas1_1327_1436204-14	GAD03457	79	579	100.276	5e-165
Vas1_1334_1446738-14	GAD03415	50	529	98.8701	8e-150
Vas1_1335_1448550-14	GAD03460	33	260	97.1545	7e-69
>>
6. NZ_KE386908_1
Source: Aliagarivorans marinus DSM 23064 G461DRAFT_scaffold00002.2, whole genome shotgun sequence.
Number of proteins with BLAST hits to this cluster: 19
MultiGeneBlast score: 19.0
Cumulative Blast bit score: 14186
Table of genes, locations, strands and annotations of subject cluster:
WP_026959704	397762	398415	-	pyridoxamine_5'-phosphate_oxidase	pdxH
WP_157360367	398523	399623	+	substrate-binding_domain-containing_protein	G461_RS0119335
WP_026973071	399951	400775	+	SDR_family_oxidoreductase	G461_RS0119340
WP_026973072	400797	401810	+	low-specificity_L-threonine_aldolase	ltaE
WP_026973073	401810	403111	+	CinA_family_nicotinamide_mononucleotide deamidase-related protein	G461_RS0119350
WP_026973074	403201	404205	+	protein-methionine-sulfoxide_reductase_catalytic subunit MsrP	msrP
WP_051333700	404223	404843	+	iron_reductase	G461_RS0119360
WP_051333701	405379	406509	+	hypothetical_protein	G461_RS0119365
WP_026973077	406545	406748	-	DUF2897_family_protein	G461_RS0119370
WP_026973078	406948	407649	-	hypothetical_protein	G461_RS0119380
WP_026973079	407643	408335	-	M15_family_metallopeptidase	G461_RS0119385
WP_035480744	408335	409477	-	succinyl-diaminopimelate_desuccinylase	dapE
WP_026973081	409470	409835	-	ArsC_family_reductase	G461_RS0119395
WP_026973082	409953	410984	-	AbrB_family_transcriptional_regulator	G461_RS0119400
WP_026973083	411273	411908	+	outer_membrane_protein_OmpW	ompW
WP_026973084	412083	412469	-	hypothetical_protein	G461_RS0119410
WP_026973085	412752	413705	-	serine_protease	G461_RS0119415
WP_026973086	414335	414706	+	hypothetical_protein	G461_RS0119420
WP_026973087	414775	415902	-	acyl-CoA_desaturase	G461_RS0119425
WP_035480746	416201	416983	-	FCD_domain-containing_protein	G461_RS24905
WP_026973088	417510	420407	-	beta-agarase	G461_RS0119435
WP_084429396	420626	421486	-	helix-turn-helix_transcriptional_regulator	G461_RS0119440
WP_157360368	421673	422578	+	ribokinase	G461_RS24910
WP_026973090	422589	424103	+	hypothetical_protein	G461_RS0119450
WP_051326773	424131	424970	+	hypothetical_protein	G461_RS24915
WP_035480747	425468	427735	+	agarase	G461_RS0119460
WP_026973092	428004	428480	+	hypothetical_protein	G461_RS0119465
WP_051333703	428504	429424	-	GntR_family_transcriptional_regulator	G461_RS24920
WP_026973093	429778	430431	+	hypothetical_protein	G461_RS0119475
WP_026973094	430471	431544	+	isocitrate/isopropylmalate_dehydrogenase_family protein	G461_RS0119480
WP_026973095	431620	432585	+	tripartite_tricarboxylate_transporter_substrate binding protein	G461_RS0119485
WP_026973096	432631	433119	+	tripartite_tricarboxylate_transporter_TctB family protein	G461_RS0119490
WP_035480748	433151	434698	+	transporter	G461_RS24925
WP_026973097	434738	435997	+	four-carbon_acid_sugar_kinase_family_protein	G461_RS0119500
WP_026973098	435994	436626	+	aldolase	G461_RS0119505
WP_026973099	436683	437615	-	hypothetical_protein	G461_RS0119510
WP_026973100	437773	438342	-	YceI_family_protein	G461_RS0119515
WP_026973101	438339	438878	-	cytochrome_b	G461_RS0119520
WP_026973102	439133	439360	-	hypothetical_protein	G461_RS0119525
WP_157360369	439615	439764	-	hypothetical_protein	G461_RS26175
WP_026973103	439937	440605	-	hypothetical_protein	G461_RS0119535
WP_026973104	440996	442216	+	extracellular_solute-binding_protein	G461_RS0119540
WP_026973105	442270	443139	+	sugar_ABC_transporter_permease	G461_RS0119545
WP_026973106	443136	443948	+	carbohydrate_ABC_transporter_permease	G461_RS0119550
WP_026973107	443957	445033	+	sn-glycerol-3-phosphate_ABC_transporter ATP-binding protein UgpC	ugpC
WP_051333704	445023	445820	+	ribonuclease_Z	G461_RS24930
WP_084429397	445816	446829	+	substrate-binding_domain-containing_protein	G461_RS0119565
WP_026973109	446851	447627	-	GntR_family_transcriptional_regulator	G461_RS0119570
WP_157360370	447669	447878	+	hypothetical_protein	G461_RS26180
WP_026960083	447875	448882	-	Ldh_family_oxidoreductase	G461_RS0119575
WP_026960084	448893	449909	-	zinc-binding_alcohol_dehydrogenase_family protein	G461_RS0119580
WP_157360373	449920	451320	-	fructuronate_reductase	G461_RS0119585
WP_026973111	451727	452662	+	sugar_kinase	G461_RS0119590
WP_026960087	452704	453345	+	bifunctional_4-hydroxy-2-oxoglutarate	eda
WP_026973112	453352	454461	+	mandelate_racemase/muconate_lactonizing_enzyme family protein	G461_RS0119600
WP_026973113	454747	455400	+	hypothetical_protein	G461_RS0119605
WP_026973114	455719	457161	-	aldehyde_dehydrogenase	aldA
WP_026973115	457247	458335	-	family_43_glycosylhydrolase	G461_RS0119615
WP_026960092	458781	459875	-	sn-glycerol-3-phosphate_ABC_transporter ATP-binding protein UgpC	ugpC
WP_051326829	460494	461285	+	sugar_ABC_transporter_permease	G461_RS0119625
WP_026973116	461285	462181	+	carbohydrate_ABC_transporter_permease	G461_RS0119630
WP_026973117	462455	463702	+	extracellular_solute-binding_protein	G461_RS0119635
WP_157360371	463939	465732	+	HAMP_domain-containing_protein	G461_RS24935
WP_026973119	466250	467581	+	hypothetical_protein	G461_RS0119645
WP_157360324	467767	467979	+	IS200/IS605_family_transposase	tnpA
Table of Blast hits (query gene, subject gene, %identity, blast score, %coverage, e-value):
Vas1_1305_1398836-14	WP_026973117	65	570	97.3621	2e-162
Vas1_1306_1400393-14	WP_026960092	78	593	100	2e-169
Vas1_1306_1400393-14	WP_026973107	52	348	101.653	1e-95
Vas1_1307_1401957-14	WP_035480746	70	367	98.0159	1e-101
Vas1_1307_1401957-14	WP_026973109	67	358	97.619	6e-99
Vas1_1308_1402890-14	WP_026973114	80	816	99.7917	0
Vas1_1310_1407068-14	WP_026973115	84	626	98.8889	2e-179
Vas1_1311_1408543-14	WP_026973119	44	353	102.715	6e-97
Vas1_1312_1409962-14	WP_026973088	49	912	94.5378	0
Vas1_1312_1409962-14	WP_035480747	41	556	74.5798	7e-158
Vas1_1313_1412905-14	WP_026973088	33	391	92.1687	5e-108
Vas1_1313_1412905-14	WP_035480747	33	384	76.004	6e-106
Vas1_1314_1416090-14	WP_026973088	56	1165	99.7938	0
Vas1_1314_1416090-14	WP_035480747	40	585	78.6598	2e-166
Vas1_1317_1423172-14	WP_035480747	67	1083	100	0
Vas1_1317_1423172-14	WP_026973088	40	568	96.371	2e-161
Vas1_1318_1425727-14	WP_035480746	73	387	99.2063	2e-107
Vas1_1318_1425727-14	WP_026973109	68	365	98.0159	5e-101
Vas1_1321_1428738-14	WP_157360371	41	430	100.168	6e-120
Vas1_1322_1430714-14	WP_026960083	76	535	100	6e-152
Vas1_1323_1431740-14	WP_026960084	79	533	100	3e-151
Vas1_1324_1432779-14	WP_157360373	66	665	94.2387	0
Vas1_1325_1434591-14	WP_026973111	71	446	95.0156	4e-125
Vas1_1326_1435569-14	WP_026960087	74	315	98.0583	3e-86
Vas1_1327_1436204-14	WP_026973112	74	547	100.276	1e-155
Vas1_1335_1448550-14	WP_026973114	37	288	96.748	3e-77
>>
7. NZ_FLQZ01000063_0
Source: Vibrio celticus strain CECT 7224, whole genome shotgun sequence.
Number of proteins with BLAST hits to this cluster: 12
MultiGeneBlast score: 12.0
Cumulative Blast bit score: 14544
Table of genes, locations, strands and annotations of subject cluster:
VCE7224_RS24820	2	178	+	IS4_family_transposase	no_locus_tag
VCE7224_RS24110	354	533	-	transposase_domain-containing_protein	no_locus_tag
VCE7224_RS14350	543	1668	-	ISL3_family_transposase	no_locus_tag
WP_065676848	1857	4751	-	beta-agarase	VCE7224_RS14355
WP_065676849	5123	7384	+	agarase	VCE7224_RS14360
WP_065676850	7449	7937	+	hypothetical_protein	VCE7224_RS14365
WP_083994335	8373	11477	+	hypothetical_protein	VCE7224_RS14370
VCE7224_RS14375	11616	13207	-	solute:sodium_symporter_family_transporter	no_locus_tag
WP_086738345	13286	14407	-	zinc-binding_dehydrogenase	VCE7224_RS14380
WP_065676852	14545	15384	-	class_II_fructose-bisphosphate_aldolase	VCE7224_RS14385
WP_065676853	15412	16926	-	hypothetical_protein	VCE7224_RS14390
WP_065676854	16939	17844	-	hypothetical_protein	VCE7224_RS14395
WP_065676855	18014	18892	+	AraC_family_transcriptional_regulator	VCE7224_RS14400
WP_065676856	18893	20137	-	hypothetical_protein	VCE7224_RS14405
WP_065676857	20227	21489	-	hypothetical_protein	VCE7224_RS14410
WP_065676858	21681	23270	-	sugar_porter_family_MFS_transporter	VCE7224_RS14415
VCE7224_RS14420	23576	24129	+	IS5_family_transposase	no_locus_tag
WP_065676859	24339	25787	-	aldehyde_dehydrogenase	aldA
WP_065676860	26101	26874	+	GntR_family_transcriptional_regulator	VCE7224_RS14430
WP_065676861	27101	30373	-	hypothetical_protein	VCE7224_RS14435
WP_065676862	30633	32075	+	aldehyde_dehydrogenase	aldA
WP_065676863	32623	34074	+	hypothetical_protein	VCE7224_RS14445
WP_065676864	34135	36999	+	beta-agarase	VCE7224_RS14450
WP_065676865	37059	38234	+	hypothetical_protein	VCE7224_RS14455
WP_065676866	38383	39234	+	transporter_substrate-binding_domain-containing protein	VCE7224_RS14460
WP_065676867	39250	40728	+	methyl-accepting_chemotaxis_protein	VCE7224_RS14465
WP_065676868	40906	42249	-	beta-agarase	VCE7224_RS14470
Table of Blast hits (query gene, subject gene, %identity, blast score, %coverage, e-value):
Vas1_1307_1401957-14	WP_065676860	77	408	98.8095	6e-114
Vas1_1308_1402890-14	WP_065676862	79	810	99.7917	0
Vas1_1308_1402890-14	WP_065676859	45	461	98.9583	2e-129
Vas1_1311_1408543-14	WP_065676863	33	239	110.633	1e-62
Vas1_1312_1409962-14	WP_065676864	73	1489	99.7899	0
Vas1_1312_1409962-14	WP_065676848	45	887	102.311	0
Vas1_1312_1409962-14	WP_065676849	40	566	78.2563	9e-161
Vas1_1313_1412905-14	WP_065676864	32	442	99.498	3e-123
Vas1_1313_1412905-14	WP_065676848	32	409	92.8715	2e-113
Vas1_1313_1412905-14	WP_065676849	32	377	75.6024	6e-104
Vas1_1314_1416090-14	WP_065676848	54	1127	99.0722	0
Vas1_1314_1416090-14	WP_065676864	47	948	100.825	0
Vas1_1314_1416090-14	WP_065676849	40	609	77.8351	1e-173
Vas1_1317_1423172-14	WP_065676849	71	1160	101.075	0
Vas1_1317_1423172-14	WP_065676848	41	587	96.1022	3e-167
Vas1_1317_1423172-14	WP_065676864	39	571	101.075	3e-162
Vas1_1318_1425727-14	WP_065676860	76	403	98.8095	3e-112
Vas1_1321_1428738-14	WP_065676867	35	179	57.4074	3e-44
Vas1_1328_1437485-14	WP_065676861	43	861	102.72	0
Vas1_1328_1437485-14	WP_083994335	36	647	97.1857	0
Vas1_1335_1448550-14	WP_065676862	35	264	96.748	5e-70
Vas1_1335_1448550-14	WP_065676859	32	245	96.3415	2e-64
Vas1_1339_1453450-14	WP_065676868	77	731	98.6726	0
Vas1_1339_1453450-14	WP_065676856	34	124	49.3363	4e-28
>>
8. NZ_JXCJ01000001_4
Source: Gilvimarinus agarilyticus strain JEA5 scaffold1, whole genome shotgun sequence.
Number of proteins with BLAST hits to this cluster: 12
MultiGeneBlast score: 12.0
Cumulative Blast bit score: 12955
Table of genes, locations, strands and annotations of subject cluster:
WP_041522653	1637159	1637965	+	nucleoside_triphosphate_pyrophosphohydrolase	mazG
WP_041522654	1637966	1638736	+	RES_family_NAD+_phosphorylase	SD69_RS07115
WP_041522655	1638753	1639847	-	hypothetical_protein	SD69_RS07120
WP_041522656	1639851	1642808	-	lysine-epsilon_oxidase	SD69_RS07125
WP_041522657	1643491	1645020	+	cellulase_family_glycosylhydrolase	SD69_RS07130
WP_084591507	1645355	1647223	+	cellulase_family_glycosylhydrolase	SD69_RS07135
WP_041522658	1647462	1647902	+	cyanase	cynS
WP_041522659	1647922	1648830	-	histone_deacetylase	SD69_RS07145
WP_041522660	1648876	1649115	+	hypothetical_protein	SD69_RS07150
WP_041522661	1649163	1649651	+	transcription_elongation_factor_GreB	greB
WP_041522662	1649697	1650947	-	SidA/IucD/PvdA_family_monooxygenase	SD69_RS07160
WP_041522663	1650964	1651272	-	2Fe-2S_iron-sulfur_cluster_binding domain-containing protein	SD69_RS07165
WP_041522664	1651318	1652475	-	cytochrome_P450	SD69_RS07170
WP_041522665	1652595	1652831	-	hypothetical_protein	SD69_RS07175
WP_041524547	1652887	1654830	-	hypothetical_protein	SD69_RS07180
WP_041522666	1655271	1656836	+	MFS_transporter	SD69_RS07185
WP_041524548	1656942	1658057	+	mandelate_racemase/muconate_lactonizing_enzyme family protein	SD69_RS07190
WP_041522667	1658066	1659091	+	(R,R)-butanediol_dehydrogenase	SD69_RS07195
WP_041522668	1659088	1659852	+	SDR_family_oxidoreductase	SD69_RS07200
WP_041522669	1659858	1661300	+	aldehyde_dehydrogenase	aldA
WP_041522670	1661467	1663830	+	agarase	SD69_RS07210
WP_041522671	1663831	1666170	+	hypothetical_protein	SD69_RS07215
WP_084591508	1666609	1670610	+	carbohydrate-binding_protein	SD69_RS07220
WP_041522673	1670667	1671137	-	HPP_family_protein	SD69_RS07225
WP_041522674	1671237	1671779	+	TetR/AcrR_family_transcriptional_regulator	SD69_RS07230
WP_041522675	1671848	1672453	-	GntR_family_transcriptional_regulator	SD69_RS07235
WP_041522676	1672674	1673480	-	ATPase	SD69_RS07240
WP_041522677	1673490	1674605	-	Zn-dependent_alcohol_dehydrogenase	SD69_RS07245
WP_041522678	1674751	1675611	+	AraC_family_transcriptional_regulator	SD69_RS07250
WP_041522679	1675743	1676786	+	UDP-glucose_4-epimerase_GalE	galE
WP_041522680	1676807	1677838	+	UDP-glucose--hexose-1-phosphate uridylyltransferase	SD69_RS07260
WP_041522681	1677843	1678991	+	galactokinase	galK
WP_084591668	1679092	1680189	-	family_43_glycosylhydrolase	SD69_RS07270
WP_041522683	1680270	1681199	-	sugar_kinase	SD69_RS07275
WP_041522684	1681563	1682621	+	galactose_mutarotase	SD69_RS07280
WP_041522685	1682648	1683676	-	SMP-30/gluconolactonase/LRE_family_protein	SD69_RS07285
WP_041522686	1683673	1684395	-	SapC_family_protein	SD69_RS07290
WP_041522687	1684444	1685997	-	tryptophan_7-halogenase	SD69_RS07295
WP_041522688	1686159	1688963	-	TonB-dependent_receptor	SD69_RS07300
WP_041522689	1689237	1692038	-	TonB-dependent_receptor	SD69_RS07305
WP_157471777	1692192	1694444	-	agarase	SD69_RS07310
WP_041522691	1694477	1695133	-	bifunctional_4-hydroxy-2-oxoglutarate	SD69_RS07315
WP_041522692	1695138	1696142	-	sugar_kinase	SD69_RS07320
WP_041522693	1696139	1697410	-	MFS_transporter	SD69_RS07325
WP_041522694	1697424	1698578	-	mandelate_racemase/muconate_lactonizing_enzyme family protein	SD69_RS07330
WP_041522695	1698580	1699242	-	GntR_family_transcriptional_regulator	SD69_RS07335
WP_084591669	1699563	1701422	+	sulfatase-like_hydrolase/transferase	SD69_RS07340
WP_041522697	1701645	1703693	-	methyl-accepting_chemotaxis_protein	SD69_RS07345
WP_041522698	1703875	1704561	-	SDR_family_NAD(P)-dependent_oxidoreductase	SD69_RS07350
WP_041522699	1704558	1705748	-	hypothetical_protein	SD69_RS07355
WP_041522700	1705748	1706530	-	IclR_family_transcriptional_regulator	SD69_RS07360
WP_041522701	1706723	1707883	+	extracellular_solute-binding_protein	SD69_RS07365
WP_041522702	1707880	1709022	+	CoA_transferase	SD69_RS07370
WP_084591509	1709019	1710173	+	CoA_transferase	SD69_RS07375
WP_041522703	1710166	1710936	+	enoyl-CoA_hydratase	SD69_RS07380
WP_041522704	1710967	1712418	+	aldehyde_dehydrogenase_family_protein	SD69_RS07385
WP_041522705	1712430	1714796	+	glycoside_hydrolase_family_2	SD69_RS07390
WP_041522706	1714856	1715236	+	hypothetical_protein	SD69_RS07395
WP_084591510	1715276	1716337	-	hypothetical_protein	SD69_RS07400
WP_041522707	1716838	1719588	+	TonB-dependent_receptor	SD69_RS07405
WP_157471629	1719677	1720894	+	family_16_glycosylhydrolase	SD69_RS07410
WP_041522708	1720956	1722635	+	Na+:solute_symporter	SD69_RS07415
WP_041522709	1722635	1723855	+	family_43_glycosylhydrolase	SD69_RS07420
WP_041524552	1723866	1726175	+	FAD-dependent_oxidoreductase	SD69_RS07425
WP_041522710	1726175	1726744	+	sigma-70_family_RNA_polymerase_sigma_factor	SD69_RS07430
WP_041522711	1726749	1728287	+	hypothetical_protein	SD69_RS07435
WP_052480967	1728329	1730617	+	agarase	SD69_RS07440
WP_041522712	1730626	1731516	-	LysR_family_transcriptional_regulator	SD69_RS07445
WP_041522713	1731603	1732586	+	putative_sulfate_exporter_family_transporter	SD69_RS07450
WP_084591511	1733327	1734928	-	family_43_glycosylhydrolase	SD69_RS18035
WP_041522715	1734849	1736174	-	hypothetical_protein	SD69_RS07465
WP_041522716	1736362	1737801	-	carbohydrate-binding_protein	SD69_RS07470
WP_041522717	1738126	1739511	-	sulfatase	SD69_RS07475
WP_041522718	1739544	1741076	-	tryptophan_7-halogenase	SD69_RS07480
WP_041522719	1741212	1743200	-	hypothetical_protein	SD69_RS07485
WP_041522720	1743274	1746957	-	TonB-dependent_receptor	SD69_RS07490
SD69_RS07495	1747504	1750740	+	heme-binding_protein	no_locus_tag
WP_041522721	1750759	1751415	+	hypothetical_protein	SD69_RS07500
WP_041522722	1751437	1752135	+	DUF1080_domain-containing_protein	SD69_RS07505
WP_041522723	1752137	1754506	+	c-type_cytochrome	SD69_RS07510
WP_041522724	1754567	1756885	-	agarase	SD69_RS07515
WP_041522725	1757055	1759244	+	FdhF/YdeP_family_oxidoreductase	SD69_RS07520
WP_041522726	1759283	1761085	-	carbohydrate-binding_protein	SD69_RS07525
WP_041522727	1761316	1763259	-	S9_family_peptidase	SD69_RS07530
WP_052480969	1763287	1764774	+	tRNA_lysidine(34)_synthetase_TilS	tilS
WP_041522728	1764979	1766601	+	CTP_synthase	SD69_RS07540
WP_041522729	1766658	1767524	+	3-deoxy-8-phosphooctulonate_synthase	kdsA
WP_041522730	1767629	1768918	+	phosphopyruvate_hydratase	SD69_RS07550
WP_084591513	1770008	1770325	+	DUF3630_family_protein	SD69_RS07555
WP_041522732	1770419	1771447	+	hypothetical_protein	SD69_RS07560
WP_041522734	1772348	1772749	+	hypothetical_protein	SD69_RS07570
WP_041522735	1772800	1773312	+	hypothetical_protein	SD69_RS07575
WP_157471630	1774397	1774993	+	hypothetical_protein	SD69_RS07585
WP_157471631	1775048	1775497	+	hypothetical_protein	SD69_RS07590
WP_041522739	1775622	1775978	+	hypothetical_protein	SD69_RS07595
WP_041522740	1776077	1776415	+	DUF3630_family_protein	SD69_RS07600
WP_157471632	1776517	1776888	+	hypothetical_protein	SD69_RS18735
WP_041524557	1777014	1777454	+	hypothetical_protein	SD69_RS07605
WP_041522741	1777599	1777877	+	hypothetical_protein	SD69_RS07610
WP_052481359	1779469	1780668	+	cytochrome_c	SD69_RS07620
WP_041522743	1780837	1781820	-	GGDEF_domain-containing_protein	SD69_RS07625
WP_041522744	1782630	1784966	+	hypothetical_protein	SD69_RS07630
WP_052480970	1785219	1785533	+	hypothetical_protein	SD69_RS07635
WP_041522745	1785552	1785821	-	hypothetical_protein	SD69_RS07640
WP_041522746	1785977	1786435	+	hypothetical_protein	SD69_RS07645
WP_041522747	1786483	1787328	+	MOSC_domain-containing_protein	SD69_RS07650
WP_157471633	1787721	1788314	+	hypothetical_protein	SD69_RS07655
WP_041524560	1788346	1788846	+	DUF2271_domain-containing_protein	SD69_RS07660
WP_041522749	1788865	1789686	+	DUF4198_domain-containing_protein	SD69_RS07665
Table of Blast hits (query gene, subject gene, %identity, blast score, %coverage, e-value):
Vas1_1308_1402890-14	WP_041522669	58	593	99.375	4e-169
Vas1_1308_1402890-14	WP_041522704	42	426	99.7917	1e-118
Vas1_1310_1407068-14	WP_084591668	68	529	99.1667	4e-150
Vas1_1310_1407068-14	WP_041522709	32	157	93.6111	5e-38
Vas1_1312_1409962-14	WP_157471777	42	612	75.4202	1e-174
Vas1_1312_1409962-14	WP_041522670	42	610	78.2563	7e-174
Vas1_1312_1409962-14	WP_052480967	41	595	80.6723	1e-169
Vas1_1312_1409962-14	WP_041522724	40	540	75.2101	8e-153
Vas1_1313_1412905-14	WP_052480967	38	420	70.5823	8e-117
Vas1_1313_1412905-14	WP_157471777	35	394	70.3815	5e-109
Vas1_1313_1412905-14	WP_041522670	32	384	82.5301	1e-105
Vas1_1313_1412905-14	WP_041522724	35	375	70.9839	4e-103
Vas1_1314_1416090-14	WP_041522670	42	625	78.0412	2e-178
Vas1_1314_1416090-14	WP_157471777	41	608	77.1134	2e-173
Vas1_1314_1416090-14	WP_052480967	43	590	72.0619	8e-168
Vas1_1314_1416090-14	WP_041522724	40	548	74.0206	3e-155
Vas1_1317_1423172-14	WP_041522670	50	788	100.806	0
Vas1_1317_1423172-14	WP_157471777	47	733	98.5215	0
Vas1_1317_1423172-14	WP_052480967	45	701	101.613	0
Vas1_1317_1423172-14	WP_041522724	42	645	98.2527	0
Vas1_1323_1431740-14	WP_041522667	35	177	84.0237	3e-44
Vas1_1326_1435569-14	WP_041522691	31	80	83.0097	2e-15
Vas1_1327_1436204-14	WP_041524548	61	441	99.1713	1e-123
Vas1_1335_1448550-14	WP_041522669	35	268	95.935	2e-71
Vas1_1335_1448550-14	WP_041522704	31	212	96.5447	2e-54
Vas1_1337_1451012-14	WP_041522730	47	387	97.4537	4e-107
Vas1_1339_1453450-14	WP_041522715	38	305	101.549	2e-82
Vas1_1339_1453450-14	WP_041522726	39	212	68.1416	2e-54
>>
9. BBMQ01000118_0
Source: Vibrio sp. C7 DNA, contig: contig00027, strain: JCM 19233, whole genome shotgun sequence.
Number of proteins with BLAST hits to this cluster: 12
MultiGeneBlast score: 12.0
Cumulative Blast bit score: 12950
Table of genes, locations, strands and annotations of subject cluster:
GAL11951	17177	17875	-	hypothetical_protein	JCM19233_2941
GAL11952	17997	18962	+	transcriptional_regulator_LysR_family	JCM19233_2942
GAL11953	19163	19477	+	hypothetical_protein	JCM19233_2943
GAL11954	19583	20629	+	hypothetical_protein	JCM19233_2944
GAL11955	20677	21465	-	Bll1341_protein	JCM19233_2945
GAL11956	21512	21745	-	hypothetical_protein	JCM19233_2946
GAL11957	22069	22332	+	sodium/bile_acid_symporter_family	JCM19233_2947
GAL11958	22326	22958	+	sodium/bile_acid_symporter_family	JCM19233_2948
GAL11959	23089	23232	-	hypothetical_protein	JCM19233_2949
GAL11960	23190	23546	-	hypothetical_protein	JCM19233_2950
GAL11961	23621	24571	-	transcriptional_regulators_LysR_family	JCM19233_2951
GAL11962	24850	25002	-	Ca2+/H+_antiporter	JCM19233_2952
GAL11963	25044	25781	-	Ca2+/H+_antiporter	JCM19233_2953
GAL11964	26380	27003	+	DedA_protein	JCM19233_2954
GAL11965	26990	27106	-	hypothetical_protein	JCM19233_2955
GAL11966	27135	27659	+	putative_exported_protein	JCM19233_2956
GAL11967	27733	28161	-	bifunctional_protein:_zinc-containing_alcohol dehydrogenase	JCM19233_2957
GAL11968	28161	28715	-	bifunctional_protein:_zinc-containing_alcohol dehydrogenase; quinone oxidoreductase	JCM19233_2958
GAL11969	28933	29286	+	zinc_uptake_regulation_protein_ZUR	JCM19233_2959
GAL11970	29289	29408	+	zinc_uptake_regulation_protein_ZUR	JCM19233_2960
GAL11971	29414	29761	+	putative_metal_chaperone	JCM19233_2961
GAL11972	29791	30300	+	putative_metal_chaperone	JCM19233_2962
GAL11973	30297	30416	+	hypothetical_protein	JCM19233_2963
GAL11974	30509	30901	-	probable_aspartoacylase	JCM19233_2964
GAL11975	30960	31376	-	probable_aspartoacylase	JCM19233_2965
GAL11976	31727	32065	+	iron-regulated_protein_A_precursor	JCM19233_2966
GAL11977	32098	32985	+	iron-regulated_protein_A_precursor	JCM19233_2967
GAL11978	33064	33261	+	hypothetical_protein	JCM19233_2968
GAL11979	33251	34495	+	probable_thiol_oxidoreductase	JCM19233_2969
GAL11980	34993	35535	+	iron-regulated_protein_A_precursor	JCM19233_2970
GAL11981	36271	36723	+	putative_exported_protein	JCM19233_2971
GAL11982	37072	38073	-	N-acetyl-D-glucosamine_ABC_transport_system	JCM19233_2972
GAL11983	38253	39119	-	ABC-type_sugar_transport_system_permease component	JCM19233_2973
GAL11984	39152	39922	-	sugar_ABC_transporter_permease	JCM19233_2974
GAL11985	40089	41342	-	ABC-type_sugar_transport_system_periplasmic component	JCM19233_2975
GAL11986	41853	42428	+	maltose/maltodextrin_transport_ATP-binding protein MalK	JCM19233_2976
GAL11987	42425	42802	+	maltose/maltodextrin_transport_ATP-binding protein MalK	JCM19233_2977
GAL11988	43279	43587	+	hexuronate_utilization_operon_transcriptional repressor ExuR	JCM19233_2978
GAL11989	43644	44036	+	Uxu_operon_transcriptional_regulator	JCM19233_2979
GAL11990	44211	45143	+	aldehyde_dehydrogenase_A	JCM19233_2980
GAL11991	45152	45652	+	aldehyde_dehydrogenase_A	JCM19233_2981
GAL11992	45830	46171	-	hypothetical_protein	JCM19233_2982
GAL11993	46245	47063	-	beta-galactosidase	JCM19233_2983
GAL11994	47093	47374	-	beta-galactosidase	JCM19233_2984
GAL11995	47329	47988	-	beta-galactosidase	JCM19233_2985
GAL11996	47970	48257	-	beta-galactosidase	JCM19233_2986
GAL11997	48491	49462	-	hypothetical_protein	JCM19233_2987
GAL11998	49854	51128	+	maltoporin	JCM19233_2988
GAL11999	51214	54072	+	agarase	JCM19233_2989
GAL12000	54173	54301	+	hypothetical_protein	JCM19233_2990
GAL12001	54285	54848	+	hypothetical_protein	JCM19233_2991
GAL12002	54920	56320	+	putative_hydrolase	JCM19233_2992
GAL12003	56353	57162	+	putative_hydrolase	JCM19233_2993
Table of Blast hits (query gene, subject gene, %identity, blast score, %coverage, e-value):
Vas1_1305_1398836-14	GAL11985	99	856	100	0
Vas1_1305_1398836-14	GAL11982	69	502	78.6571	9e-142
Vas1_1306_1400393-14	GAL11986	95	375	52.6171	1e-103
Vas1_1306_1400393-14	GAL11987	100	259	34.4353	6e-69
Vas1_1307_1401957-14	GAL11989	99	266	51.5873	4e-71
Vas1_1307_1401957-14	GAL11988	100	197	36.9048	2e-50
Vas1_1308_1402890-14	GAL11990	91	560	63.75	3e-159
Vas1_1308_1402890-14	GAL11991	99	349	34.5833	8e-96
Vas1_1309_1404514-14	GAL11993	94	447	27.6885	8e-125
Vas1_1309_1404514-14	GAL11995	94	387	24.7219	7e-107
Vas1_1309_1404514-14	GAL11992	95	225	13.9679	4e-58
Vas1_1309_1404514-14	GAL11996	98	147	8.15822	1e-34
Vas1_1309_1404514-14	GAL11994	92	147	8.77627	1e-34
Vas1_1310_1407068-14	GAL11997	99	655	87.7778	0
Vas1_1311_1408543-14	GAL11998	48	414	100.452	3e-115
Vas1_1312_1409962-14	GAL11999	99	1954	100	0
Vas1_1312_1409962-14	GAL12002	35	224	49.0546	7e-58
Vas1_1312_1409962-14	GAL12003	51	192	18.1723	5e-48
Vas1_1313_1412905-14	GAL12002	97	879	43.4739	0
Vas1_1313_1412905-14	GAL12003	99	560	27.008	1e-158
Vas1_1313_1412905-14	GAL11999	35	459	92.5703	2e-128
Vas1_1313_1412905-14	GAL12001	95	322	17.9719	4e-87
Vas1_1313_1412905-14	GAL12000	100	85	4.11647	8e-16
Vas1_1314_1416090-14	GAL11999	48	961	100.515	0
Vas1_1314_1416090-14	GAL12002	32	206	50.2062	2e-52
Vas1_1314_1416090-14	GAL12003	52	202	19.3814	4e-51
Vas1_1317_1423172-14	GAL11999	41	582	98.2527	1e-165
Vas1_1317_1423172-14	GAL12003	52	205	22.9839	4e-52
Vas1_1318_1425727-14	GAL11989	64	186	51.5873	7e-47
Vas1_1318_1425727-14	GAL11988	80	148	34.127	1e-35
>>
10. NZ_MUZU01000002_0
Source: Colwellia agarivorans strain QM50 contig2, whole genome shotgun sequence.
Number of proteins with BLAST hits to this cluster: 11
MultiGeneBlast score: 11.0
Cumulative Blast bit score: 9396
Table of genes, locations, strands and annotations of subject cluster:
WP_077338406	47201	48880	-	SufS_family_cysteine_desulfurase	sufS
WP_077338407	49041	49220	+	hypothetical_protein	B0X80_RS03325
WP_139345286	49255	50697	-	hypothetical_protein	B0X80_RS03330
WP_077338829	50785	51714	-	lipoprotein_NlpI	nlpI
WP_077338409	51789	53909	-	polyribonucleotide_nucleotidyltransferase	pnp
WP_077338410	54218	54889	+	carboxylesterase	B0X80_RS03345
WP_077338411	54958	57213	-	arginine/lysine/ornithine_decarboxylase	B0X80_RS03350
WP_077338412	57269	58594	-	HlyC/CorC_family_transporter	B0X80_RS03355
WP_077338413	58707	59759	-	peptidase_M42	B0X80_RS03360
WP_077338414	59815	61722	-	bifunctional_glutathionylspermidine	B0X80_RS03365
WP_077338415	62019	62552	-	DUF962_domain-containing_protein	B0X80_RS03370
WP_076419170	62769	63374	-	peroxiredoxin_C	B0X80_RS03375
WP_076419171	63485	63823	-	Grx4_family_monothiol_glutaredoxin	B0X80_RS03380
WP_077338416	64148	64729	+	superoxide_dismutase_[Fe]	sodB
WP_077338417	64854	66428	-	MFS_transporter	B0X80_RS03390
WP_076419174	66502	67581	-	family_43_glycosylhydrolase	B0X80_RS03395
WP_077338418	67898	70231	+	agarase	B0X80_RS03400
WP_077338419	70629	71243	+	GntR_family_transcriptional_regulator	B0X80_RS03405
WP_077338420	71623	72714	+	6-bladed_beta-propeller	B0X80_RS03410
WP_077338421	72801	74759	-	CRTAC1_family_protein	B0X80_RS03415
WP_077338422	74804	75541	-	SapC_family_protein	B0X80_RS03420
WP_077338423	75557	77110	-	tryptophan_7-halogenase	B0X80_RS03425
WP_077338424	77200	79983	-	TonB-dependent_receptor	B0X80_RS03430
WP_077338425	80322	81785	-	aldehyde_dehydrogenase	aldA
WP_077338830	81790	82554	-	2,5-didehydro-3-deoxy-L-galactonate_5-reductase	B0X80_RS03440
WP_077338426	82591	83613	-	alcohol_dehydrogenase_catalytic domain-containing protein	B0X80_RS03445
WP_077338427	83624	84736	-	mandelate_racemase/muconate_lactonizing_enzyme family protein	B0X80_RS03450
WP_077338428	85098	85859	-	phytanoyl-CoA_dioxygenase_family_protein	B0X80_RS03455
WP_077338429	86223	87254	+	SMP-30/gluconolactonase/LRE_family_protein	B0X80_RS03460
WP_077338430	87442	88212	+	IclR_family_transcriptional_regulator	B0X80_RS03465
WP_077338431	88214	89074	-	helix-turn-helix_transcriptional_regulator	B0X80_RS03470
WP_077338432	89233	90345	+	Zn-dependent_alcohol_dehydrogenase	B0X80_RS03475
WP_077338433	90405	91208	+	prolyl_oligopeptidase_family_serine_peptidase	B0X80_RS03480
WP_139345287	91342	91659	+	hypothetical_protein	B0X80_RS03485
WP_077338435	92280	92537	+	hypothetical_protein	B0X80_RS03490
WP_077338436	92640	93026	+	hypothetical_protein	B0X80_RS03495
WP_077338437	93130	93345	+	hypothetical_protein	B0X80_RS03500
WP_077338438	93482	93928	+	hypothetical_protein	B0X80_RS03505
WP_077338439	94155	95570	-	Rieske_2Fe-2S_domain-containing_protein	B0X80_RS03510
WP_077338440	95630	96724	-	ferredoxin--NADP_reductase	B0X80_RS03515
WP_089024837	96980	99361	-	agarase	B0X80_RS03520
WP_077338441	99513	101819	-	agarase	B0X80_RS03525
WP_077338442	102291	104567	+	marine_proteobacterial_sortase_target_protein	B0X80_RS03530
WP_077338443	104554	105171	+	class_GN_sortase	B0X80_RS03535
WP_077338444	105291	105728	-	DoxX_family_protein	B0X80_RS03540
WP_077338445	105775	106623	-	DUF2063_domain-containing_protein	B0X80_RS03545
WP_077338446	106589	107560	-	DUF692_domain-containing_protein	B0X80_RS03550
WP_077338447	107590	107877	-	DUF2282_domain-containing_protein	B0X80_RS03555
WP_076419203	107966	108433	-	YHS_domain-containing_protein	B0X80_RS03560
WP_077338448	108557	109393	+	helix-turn-helix_domain-containing_protein	B0X80_RS03565
WP_077338449	109404	109985	-	DJ-1/PfpI_family_protein	B0X80_RS03570
WP_077338450	110081	110698	-	LysE_family_transporter	B0X80_RS03575
WP_089024830	110827	111720	+	LysR_family_transcriptional_regulator_ArgP	B0X80_RS03580
WP_077338833	111798	112412	+	alpha-ketoglutarate-dependent_dioxygenase_AlkB	B0X80_RS03585
WP_077338451	112642	114939	+	YgiQ_family_radical_SAM_protein	B0X80_RS03590
WP_077338452	115046	116638	+	ABC-F_family_ATPase	B0X80_RS03595
WP_077338453	116736	117554	-	mechanosensitive_ion_channel	B0X80_RS03600
WP_077338454	117733	118572	+	23S_rRNA_(adenine(2030)-N(6))-methyltransferase RlmJ	B0X80_RS03605
WP_077338455	118594	119010	-	GFA_family_protein	B0X80_RS03610
WP_077338456	119033	120364	-	DEAD/DEAH_box_helicase	B0X80_RS03615
WP_077338457	120576	121487	+	MipA/OmpV_family_protein	B0X80_RS03620
WP_077338458	121548	122966	-	glutamate--tRNA_ligase	gltX
WP_076417906	124118	125173	-	3-deoxy-7-phosphoheptulonate_synthase_AroG	aroG
WP_077338459	125395	126396	+	adenosine_deaminase	B0X80_RS03650
WP_077338460	126572	127276	+	purine-nucleoside_phosphorylase	deoD
WP_077338461	127353	129620	-	TonB-dependent_receptor	B0X80_RS03660
Table of Blast hits (query gene, subject gene, %identity, blast score, %coverage, e-value):
Vas1_1308_1402890-14	WP_077338425	55	547	98.3333	2e-155
Vas1_1310_1407068-14	WP_076419174	74	568	98.6111	1e-161
Vas1_1312_1409962-14	WP_077338441	43	614	75.105	3e-175
Vas1_1312_1409962-14	WP_077338418	40	602	79.0966	2e-171
Vas1_1312_1409962-14	WP_089024837	40	579	79.2017	1e-164
Vas1_1313_1412905-14	WP_077338441	36	414	77.7108	9e-115
Vas1_1313_1412905-14	WP_077338418	33	382	79.6185	2e-105
Vas1_1313_1412905-14	WP_089024837	32	347	71.5863	8e-95
Vas1_1314_1416090-14	WP_077338418	41	628	78.9691	3e-179
Vas1_1314_1416090-14	WP_077338441	41	610	77.3196	4e-174
Vas1_1314_1416090-14	WP_089024837	39	543	71.3402	7e-154
Vas1_1317_1423172-14	WP_077338418	51	813	100.806	0
Vas1_1317_1423172-14	WP_077338441	48	770	100.134	0
Vas1_1317_1423172-14	WP_089024837	42	635	96.2366	0
Vas1_1323_1431740-14	WP_077338426	34	167	82.5444	3e-41
Vas1_1327_1436204-14	WP_077338427	63	463	98.895	4e-130
Vas1_1328_1437485-14	WP_077338421	39	389	58.9118	2e-107
Vas1_1332_1444387-14	WP_077338448	31	57	31.6901	3e-08
Vas1_1335_1448550-14	WP_077338425	34	268	96.748	3e-71
>>
11. NZ_CP020472_10
Source: Shewanella japonica strain KCTC 22435 chromosome, complete genome.
Number of proteins with BLAST hits to this cluster: 11
MultiGeneBlast score: 11.0
Cumulative Blast bit score: 5215
Table of genes, locations, strands and annotations of subject cluster:
WP_055024512	2457385	2457561	-	cbb3-type_cytochrome_c_oxidase_subunit_3	SJ2017_RS10495
WP_055024513	2457572	2458186	-	cytochrome-c_oxidase,_cbb3-type_subunit_II	ccoO
WP_055024514	2458198	2459631	-	cytochrome-c_oxidase,_cbb3-type_subunit_I	ccoN
WP_156003226	2459903	2460355	+	hypothetical_protein	SJ2017_RS10510
WP_055024516	2460484	2460723	+	hypothetical_protein	SJ2017_RS10515
WP_080915718	2461530	2462813	-	tyrosine-type_recombinase/integrase	SJ2017_RS10520
WP_080915719	2462928	2464013	-	response_regulator	SJ2017_RS10525
WP_156003229	2464067	2468854	-	PAS_domain_S-box_protein	SJ2017_RS10530
WP_080915721	2468851	2470065	-	EAL_domain-containing_response_regulator	SJ2017_RS10535
WP_080915722	2470260	2473718	-	TonB-dependent_receptor	SJ2017_RS10540
WP_080915723	2474260	2476623	-	hypothetical_protein	SJ2017_RS10545
WP_080915724	2476706	2477782	-	family_43_glycosylhydrolase	SJ2017_RS10550
WP_080915725	2477859	2478809	-	sugar_kinase	SJ2017_RS10555
WP_080915726	2478812	2480425	-	sugar_porter_family_MFS_transporter	SJ2017_RS10560
WP_080915727	2480867	2483233	+	agarase	SJ2017_RS10565
WP_080915728	2483549	2484166	+	GntR_family_transcriptional_regulator	SJ2017_RS10570
WP_080915729	2484832	2485161	+	hypothetical_protein	SJ2017_RS10575
WP_119969269	2485402	2486736	+	beta-agarase	SJ2017_RS10580
WP_080915730	2486873	2487448	-	hypothetical_protein	SJ2017_RS10585
WP_080915731	2487508	2487828	-	YkgJ_family_cysteine_cluster_protein	SJ2017_RS10590
WP_080915732	2487938	2488642	-	pseudouridine_synthase	SJ2017_RS10595
WP_080915733	2488739	2489485	-	hypothetical_protein	SJ2017_RS10600
WP_080915734	2489850	2490278	+	hypothetical_protein	SJ2017_RS10605
WP_080915735	2490381	2491139	-	SapC_family_protein	SJ2017_RS10610
WP_080915736	2491158	2492759	-	tryptophan_7-halogenase	SJ2017_RS10615
WP_080915737	2492967	2495741	-	TonB-dependent_receptor	SJ2017_RS10620
WP_080915738	2496207	2498564	+	CRTAC1_family_protein	SJ2017_RS10625
WP_080915739	2498649	2499284	-	HAD_family_phosphatase	SJ2017_RS10630
WP_119969220	2499617	2501065	-	aldehyde_dehydrogenase	aldA
WP_055024540	2501070	2501846	-	SDR_family_oxidoreductase	SJ2017_RS10640
WP_080915741	2501857	2502879	-	alcohol_dehydrogenase_catalytic domain-containing protein	SJ2017_RS10645
WP_055024542	2502890	2503999	-	mandelate_racemase/muconate_lactonizing_enzyme family protein	SJ2017_RS10650
WP_080915742	2504239	2505108	-	helix-turn-helix_transcriptional_regulator	SJ2017_RS10655
WP_080915743	2505264	2506346	+	6-bladed_beta-propeller	SJ2017_RS10660
WP_080915744	2506517	2507431	-	LysR_family_transcriptional_regulator	SJ2017_RS10665
WP_080915745	2507700	2508548	+	enoyl-CoA_hydratase/isomerase_family_protein	SJ2017_RS10670
WP_080915746	2508632	2510626	-	TonB-dependent_copper_receptor	SJ2017_RS10675
WP_055024548	2510979	2511299	+	glutaredoxin_family_protein	SJ2017_RS10680
WP_055024549	2511426	2511845	-	hypothetical_protein	SJ2017_RS10685
WP_065108052	2512277	2512684	+	DNA_polymerase_V	SJ2017_RS10690
WP_080915747	2512688	2513944	+	Y-family_DNA_polymerase	SJ2017_RS10695
WP_156003454	2514286	2514810	+	hypothetical_protein	SJ2017_RS10700
WP_055024553	2514935	2516008	-	biotin/lipoyl-binding_protein	SJ2017_RS10705
SJ2017_RS10710	2516009	2516419	-	magnesium_transporter	no_locus_tag
WP_055024555	2516659	2517465	+	LysR_family_transcriptional_regulator	SJ2017_RS10715
WP_080915750	2517526	2520234	+	bifunctional_acetate--CoA_ligase_family	SJ2017_RS10720
WP_080917459	2520412	2521386	-	GGDEF_domain-containing_protein	SJ2017_RS10725
WP_080915751	2521737	2522303	+	serine_protease_inhibitor_ecotin	eco
WP_055024558	2522396	2522674	-	hypothetical_protein	SJ2017_RS10735
WP_080917460	2522692	2524662	-	RecQ_family_ATP-dependent_DNA_helicase	SJ2017_RS10740
Table of Blast hits (query gene, subject gene, %identity, blast score, %coverage, e-value):
Vas1_1308_1402890-14	WP_119969220	57	561	98.3333	1e-159
Vas1_1310_1407068-14	WP_080915724	77	583	99.1667	3e-166
Vas1_1312_1409962-14	WP_080915727	41	600	78.3613	6e-171
Vas1_1313_1412905-14	WP_080915727	34	383	75.4016	1e-105
Vas1_1314_1416090-14	WP_080915727	42	600	78.2474	7e-171
Vas1_1317_1423172-14	WP_080915727	52	781	95.8333	0
Vas1_1323_1431740-14	WP_080915741	31	169	86.6864	9e-42
Vas1_1327_1436204-14	WP_055024542	61	433	96.6851	4e-121
Vas1_1328_1437485-14	WP_080915738	32	301	64.9156	9e-81
Vas1_1335_1448550-14	WP_119969220	33	249	98.1707	8e-66
Vas1_1339_1453450-14	WP_119969269	62	555	97.3451	7e-158
>>
12. BBSC01000005_1
Source: Vibrio ishigakensis DNA, contig00005, strain: JCM19241, whole genome shotgun sequence.
Number of proteins with BLAST hits to this cluster: 11
MultiGeneBlast score: 11.0
Cumulative Blast bit score: 4837
Table of genes, locations, strands and annotations of subject cluster:
GAM76084	218466	218579	-	hypothetical_protein	JCM19241_382
GAM76085	218564	219043	-	hypothetical_protein	JCM19241_383
GAM76086	219118	219531	-	protein_export_cytoplasm_protein_secA_ATPase_RNA helicase	JCM19241_384
GAM76087	219748	220257	+	transcriptional_regulator	JCM19241_385
GAM76088	220254	220613	+	transcriptional_regulator	JCM19241_386
GAM76089	220610	220789	-	ubiquinone/menaquinone_biosynthesis methyltransferase ubiE	JCM19241_387
GAM76090	220951	221190	-	ubiquinone/menaquinone_biosynthesis methyltransferase ubiE	JCM19241_388
GAM76091	221306	222178	-	transcriptional_regulator	JCM19241_389
GAM76092	222289	223263	+	oxidoreductase	JCM19241_390
GAM76093	223265	223663	+	hypothetical_protein	JCM19241_391
GAM76094	224430	224744	+	putative_cytoplasmic_protein	JCM19241_392
GAM76095	224747	225109	-	mcbG-like_protein	JCM19241_393
GAM76096	225448	225732	-	hypothetical_protein	JCM19241_394
GAM76097	226033	226542	+	hypothetical_protein	JCM19241_395
GAM76098	226724	226906	-	protein_yeeX	JCM19241_396
GAM76099	227126	227782	+	hypothetical_protein	JCM19241_397
GAM76100	227782	228057	+	putative_endonuclease	JCM19241_398
GAM76101	228054	228266	+	hypothetical_protein	JCM19241_399
GAM76102	228269	228745	+	autoinducer_2-binding_periplasmic_protein_luxP precursor	JCM19241_400
GAM76103	228696	229154	+	autoinducer_2-binding_periplasmic_protein_luxP precursor	JCM19241_401
GAM76104	229238	230170	+	autoinducer_2_sensor_kinase	JCM19241_402
GAM76105	230257	231162	+	sensory_box_histidine_kinase	JCM19241_403
GAM76106	231240	231665	+	autoinducer_2_sensor_kinase	JCM19241_404
GAM76107	232322	232495	+	hypothetical_protein	JCM19241_405
GAM76108	232640	233155	+	arginine/ornithine_antiporter_arcD	JCM19241_406
GAM76109	233169	233879	-	urate_oxidase	JCM19241_407
GAM76110	233891	234097	-	urate_oxidase	JCM19241_408
GAM76111	234134	234865	-	hydantoin_racemase	JCM19241_409
GAM76112	234866	235285	-	transcriptional_regulator	JCM19241_410
GAM76113	235345	235539	-	transcriptional_regulator	JCM19241_411
GAM76114	235850	237289	+	hydantoin_permease	JCM19241_412
GAM76115	237402	237518	+	hypothetical_protein	JCM19241_413
GAM76116	237773	238564	+	ABC-type_amino_acid_transport/signal transduction systems	JCM19241_414
GAM76117	238582	239250	+	amino_acid_ABC_transporter	JCM19241_415
GAM76118	239263	239763	+	putative_amino_acid_ABC_transporter	JCM19241_416
GAM76119	239784	239912	+	putative_amino_acid_ABC_transporter	JCM19241_417
GAM76120	239899	240627	+	glutamate_transport_ATP-binding_protein	JCM19241_418
GAM76121	240640	241449	+	rpiR-family_transcriptional_regulatory_protein	JCM19241_419
GAM76122	241797	242618	+	amidase	JCM19241_420
GAM76123	242656	243063	+	gamma-glutamyltranspeptidase	JCM19241_421
GAM76124	243261	243746	+	gamma-glutamyltranspeptidase	JCM19241_422
GAM76125	243786	244220	+	gamma-glutamyltranspeptidase	JCM19241_423
GAM76126	244220	244366	+	serine-pyruvate_aminotransferase	JCM19241_424
GAM76127	244363	244680	+	serine-pyruvate_aminotransferase	JCM19241_425
GAM76128	244677	245447	+	serine-pyruvate_aminotransferase	JCM19241_426
GAM76129	245485	246690	+	N-carbamoyl-L-amino_acid_hydrolase	JCM19241_427
GAM76130	246683	247114	+	hypothetical_protein	JCM19241_428
GAM76131	247212	247508	+	hypothetical_protein	JCM19241_429
GAM76132	247565	247861	+	chromate_transporter	JCM19241_430
GAM76133	247858	248118	+	hypothetical_protein	JCM19241_431
GAM76134	248151	248375	+	chromate_transporter	JCM19241_432
GAM76135	248336	248515	+	chromate_transporter	JCM19241_433
GAM76136	248487	248675	+	hypothetical_protein	JCM19241_434
GAM76137	249199	249327	+	hypothetical_protein	JCM19241_435
GAM76138	249750	250610	+	hypothetical_protein	JCM19241_436
GAM76139	250813	251907	+	hypothetical_protein	JCM19241_437
GAM76140	253054	254055	+	hypothetical_protein	JCM19241_438
GAM76141	254445	255299	+	hypothetical_protein	JCM19241_439
GAM76142	255478	255771	+	hypothetical_protein	JCM19241_440
GAM76143	255794	256795	-	transcriptional_regulator	JCM19241_441
GAM76144	256833	257507	-	2,4-dihydroxyhept-2-ene-1,7-dioic_acid_aldolase	JCM19241_442
GAM76145	257632	258192	-	histidinol_dehydrogenase	JCM19241_443
GAM76146	258225	258917	-	histidinol_dehydrogenase	JCM19241_444
GAM76147	259088	259492	-	TRAP-type_transport_system	JCM19241_445
GAM76148	259521	259934	-	TRAP-type_transport_system	JCM19241_446
GAM76149	260131	260466	-	TRAP-type_transport_system	JCM19241_447
GAM76150	260451	260636	-	hypothetical_protein	JCM19241_448
GAM76151	260869	261690	-	TRAP_transporter_solute_receptor	JCM19241_449
GAM76152	262122	262784	+	3-oxoacyl-(acyl-carrier_protein)_reductase	JCM19241_450
GAM76153	263281	263814	-	oxidoreductase_component_of_anaerobic dehydrogenases	JCM19241_451
GAM76154	263895	264740	-	anaerobic_dimethyl_sulfoxide_reductase_chain_C	JCM19241_452
GAM76155	264817	264948	-	anaerobic_dimethyl_sulfoxide_reductase_chain_B	JCM19241_453
GAM76156	264948	265367	-	anaerobic_dimethyl_sulfoxide_reductase_chain_B	JCM19241_454
GAM76157	265367	266926	-	anaerobic_dimethyl_sulfoxide_reductase_chain_A	JCM19241_455
GAM76158	266944	267639	-	anaerobic_dimethyl_sulfoxide_reductase_chain_A	JCM19241_456
GAM76159	268040	269893	+	hypothetical_protein	JCM19241_457
Table of Blast hits (query gene, subject gene, %identity, blast score, %coverage, e-value):
Vas1_1340_1455206-14	GAM76116	78	424	100	1e-118
Vas1_1341_1456011-14	GAM76117	86	394	100	8e-110
Vas1_1341_1456011-14	GAM76118	39	97	63.5135	3e-20
Vas1_1342_1456691-14	GAM76118	85	291	75.463	9e-79
Vas1_1342_1456691-14	GAM76117	33	105	81.4815	8e-23
Vas1_1342_1456691-14	GAM76119	88	81	19.4444	2e-15
Vas1_1343_1457463-14	GAM76120	89	369	100	2e-102
Vas1_1344_1458095-14	GAM76121	63	370	100	2e-102
Vas1_1345_1458933-14	GAM76122	54	289	68.262	1e-77
Vas1_1346_1460123-14	GAM76125	71	231	27.3423	3e-60
Vas1_1346_1460123-14	GAM76124	64	179	24.6654	1e-44
Vas1_1346_1460123-14	GAM76123	78	132	17.0172	2e-30
Vas1_1347_1461691-14	GAM76128	86	469	62.3472	4e-132
Vas1_1347_1461691-14	GAM76127	80	155	21.7604	2e-37
Vas1_1347_1461691-14	GAM76126	89	94	11.4914	4e-19
Vas1_1348_1462939-14	GAM76129	69	572	94.2446	7e-163
Vas1_1349_1464197-14	GAM76130	53	134	46.0993	4e-31
Vas1_1349_1464197-14	GAM76131	46	64	23.7589	2e-10
Vas1_1350_1465069-14	GAM76132	85	173	50.2618	2e-43
Vas1_1350_1465069-14	GAM76133	65	99	36.1257	7e-21
Vas1_1350_1465069-14	GAM76134	48	61	28.2723	1e-09
Vas1_1350_1465069-14	GAM76135	50	54	27.2251	2e-07
>>
13. NZ_CP013926_4
Source: Alteromonas stellipolaris strain LMG 21861, complete genome.
Number of proteins with BLAST hits to this cluster: 10
MultiGeneBlast score: 10.0
Cumulative Blast bit score: 7775
Table of genes, locations, strands and annotations of subject cluster:
WP_057794082	683653	684486	+	thymidylate_synthase	AVL57_RS02900
WP_057794080	684496	685521	+	response_regulator	AVL57_RS02905
WP_057794078	685521	686480	+	sensor_domain-containing_diguanylate_cyclase	AVL57_RS02910
WP_057794075	686592	688778	-	response_regulator	AVL57_RS02915
WP_057794073	689027	690364	-	MFS_transporter	AVL57_RS02920
WP_013785507	690483	690806	-	hypothetical_protein	AVL57_RS02925
WP_057794071	690943	691815	-	DUF3530_family_protein	AVL57_RS02930
WP_057794069	691945	692730	-	hypothetical_protein	AVL57_RS02935
WP_057794067	692730	695558	-	RNA_polymerase-associated_protein_RapA	rapA
WP_057794064	695930	697327	+	PhoH_family_protein	AVL57_RS02945
WP_057794062	697451	700198	-	TonB-dependent_receptor	AVL57_RS02950
WP_057794060	700692	701294	-	GntR_family_transcriptional_regulator	AVL57_RS02955
WP_138118139	701617	703482	-	sulfatase-like_hydrolase/transferase	AVL57_RS02960
WP_057794058	703624	705075	-	aldehyde_dehydrogenase	aldA
WP_057794056	705078	705842	-	SDR_family_oxidoreductase	AVL57_RS02970
WP_057794054	705844	706869	-	alcohol_dehydrogenase_catalytic domain-containing protein	AVL57_RS02975
WP_082605065	706881	707996	-	mandelate_racemase/muconate_lactonizing_enzyme family protein	AVL57_RS02980
WP_057794050	708476	710053	+	MFS_transporter	AVL57_RS02985
WP_082604975	710058	711044	+	sugar_kinase	AVL57_RS02990
WP_057794047	711037	712113	+	family_43_glycosylhydrolase	AVL57_RS02995
WP_061093570	712245	713102	+	AraC_family_transcriptional_regulator	AVL57_RS03000
WP_057796377	713333	714547	+	cytochrome_P450	AVL57_RS03005
WP_057794043	714602	714913	+	2Fe-2S_iron-sulfur_cluster_binding domain-containing protein	AVL57_RS03010
WP_138118129	714914	716302	+	oxidoreductase	AVL57_RS03015
WP_082605064	716662	719217	+	CRTAC1_family_protein	AVL57_RS03025
WP_057794034	719240	720244	+	hypothetical_protein	AVL57_RS03030
WP_057794032	720357	721130	-	phytanoyl-CoA_dioxygenase_family_protein	AVL57_RS03035
WP_057794030	721314	722072	+	helix-turn-helix_domain-containing_protein	AVL57_RS03040
WP_082605063	722129	722740	-	GntR_family_transcriptional_regulator	AVL57_RS03045
WP_057794026	722953	725277	+	family_14_glycosylhydrolase	AVL57_RS03050
WP_057796375	725626	727860	-	CRTAC1_family_protein	AVL57_RS03055
WP_057794024	728101	729006	+	family_16_glycosylhydrolase	AVL57_RS03060
WP_057794022	729124	731289	+	hypothetical_protein	AVL57_RS03065
WP_057794020	731331	733649	-	hypothetical_protein	AVL57_RS03070
WP_082604974	733952	735661	-	sulfatase-like_hydrolase/transferase	AVL57_RS03075
WP_138118127	735713	736702	-	glycosyl_hydrolase	AVL57_RS03080
WP_057794018	736692	738209	-	tryptophan_7-halogenase	AVL57_RS03085
WP_057794016	738272	740812	-	hypothetical_protein	AVL57_RS03090
WP_063457212	740824	744369	-	TonB-dependent_receptor	AVL57_RS03095
WP_057794012	745103	747460	+	twin-arginine_translocation_pathway_signal	AVL57_RS03100
WP_057794011	747486	749264	+	sulfatase-like_hydrolase/transferase	AVL57_RS03105
WP_057794008	749493	751346	+	TonB-dependent_receptor	AVL57_RS03110
WP_061093571	751363	752700	+	cytochrome_c	AVL57_RS03115
WP_138118125	752727	754202	+	hypothetical_protein	AVL57_RS03120
Table of Blast hits (query gene, subject gene, %identity, blast score, %coverage, e-value):
Vas1_1308_1402890-14	WP_057794058	55	546	98.3333	5e-155
Vas1_1310_1407068-14	WP_057794047	73	559	98.3333	4e-159
Vas1_1312_1409962-14	WP_057794026	44	610	76.7857	5e-174
Vas1_1312_1409962-14	WP_057794020	42	604	76.6807	3e-172
Vas1_1313_1412905-14	WP_057794020	36	407	72.6908	6e-113
Vas1_1313_1412905-14	WP_057794026	34	404	79.9197	8e-112
Vas1_1314_1416090-14	WP_057794026	42	607	77.6289	5e-173
Vas1_1314_1416090-14	WP_057794020	40	572	75.7732	2e-162
Vas1_1317_1423172-14	WP_057794026	51	793	98.5215	0
Vas1_1317_1423172-14	WP_057794020	46	679	91.9355	0
Vas1_1323_1431740-14	WP_057794054	34	169	82.2485	1e-41
Vas1_1327_1436204-14	WP_082605065	56	404	100	2e-112
Vas1_1328_1437485-14	WP_057796375	44	642	70.5441	0
Vas1_1328_1437485-14	WP_082605064	43	523	66.6979	8e-148
Vas1_1335_1448550-14	WP_057794058	32	256	96.1382	1e-67
>>
14. BBMQ01000064_0
Source: Vibrio sp. C7 DNA, contig: contig00095, strain: JCM 19233, whole genome shotgun sequence.
Number of proteins with BLAST hits to this cluster: 10
MultiGeneBlast score: 10.0
Cumulative Blast bit score: 5651
Table of genes, locations, strands and annotations of subject cluster:
GAL10867	71	571	+	enolase	JCM19233_1852
GAL10868	574	1368	+	enolase	JCM19233_1853
GAL10869	1434	2192	-	hypothetical_protein	JCM19233_1854
GAL10870	2477	2596	-	hypothetical_protein	JCM19233_1855
GAL10871	2568	3323	+	agarase	JCM19233_1856
GAL10872	3476	3865	+	hypothetical_protein	JCM19233_1857
GAL10873	4264	5055	+	ABC-type_amino_acid_transport/signal	JCM19233_1858
GAL10874	5069	5737	+	amino_acid_ABC_transporter_permease_protein	JCM19233_1859
GAL10875	5749	6150	+	putative_amino_acid_ABC_transporter_permease protein	JCM19233_1860
GAL10876	6201	6398	+	putative_amino_acid_ABC_transporter_permease protein	JCM19233_1861
GAL10877	6385	7113	+	putative_amino_acid_ABC_transporter_ATP-binding protein	JCM19233_1862
GAL10878	7152	7964	+	putative_rpiR-family_transcriptional_regulatory protein	JCM19233_1863
GAL10879	7989	8480	+	amidase	JCM19233_1864
GAL10880	8459	9181	+	amidase	JCM19233_1865
GAL10881	9178	9642	+	gamma-glutamyltranspeptidase	JCM19233_1866
Table of Blast hits (query gene, subject gene, %identity, blast score, %coverage, e-value):
Vas1_1337_1451012-14	GAL10868	99	543	61.1111	4e-154
Vas1_1337_1451012-14	GAL10867	98	305	35.4167	1e-82
Vas1_1338_1452377-14	GAL10869	99	515	100	5e-146
Vas1_1339_1453450-14	GAL10871	99	517	55.0885	2e-146
Vas1_1339_1453450-14	GAL10872	99	268	28.5398	2e-71
Vas1_1340_1455206-14	GAL10873	98	525	100	3e-149
Vas1_1341_1456011-14	GAL10874	98	439	100	2e-123
Vas1_1341_1456011-14	GAL10875	39	85	50.4505	9e-17
Vas1_1342_1456691-14	GAL10875	97	263	61.1111	3e-70
Vas1_1342_1456691-14	GAL10876	98	131	30.0926	1e-30
Vas1_1342_1456691-14	GAL10874	33	108	84.7222	7e-24
Vas1_1343_1457463-14	GAL10877	100	405	100	4e-113
Vas1_1344_1458095-14	GAL10878	96	541	100	6e-154
Vas1_1345_1458933-14	GAL10880	92	456	59.9496	5e-128
Vas1_1345_1458933-14	GAL10879	94	295	37.7834	2e-79
Vas1_1346_1460123-14	GAL10881	86	255	29.2543	2e-67
>>
15. CP014034_5
Source: Vibrio fluvialis strain ATCC 33809 chromosome 1, complete sequence.
Number of proteins with BLAST hits to this cluster: 10
MultiGeneBlast score: 10.0
Cumulative Blast bit score: 4519
Table of genes, locations, strands and annotations of subject cluster:
AMF92538	725978	727435	+	PTS_N-acetylmuramic_acid_transporter_subunits IIBC	AL536_03395
AMF93365	727502	728650	-	MFS_transporter	AL536_03400
AMF92539	729109	729828	+	4-carboxymuconolactone_decarboxylase	AL536_03405
AMF93366	729877	730359	+	cupin_domain-containing_protein	AL536_03410
AMF92540	730570	731679	+	alpha/beta_hydrolase	AL536_03415
AMF92541	731900	732508	+	transcriptional_regulator	AL536_03420
AMF92542	732587	733105	-	23S_rRNA_methyltransferase	AL536_03425
AMF92543	733337	734437	+	DUF4172_domain-containing_protein	AL536_03430
AMF92544	734722	735180	+	N-acetyltransferase	AL536_03435
AMF92545	735264	735707	+	DUF2000_domain-containing_protein	AL536_03440
AMF93367	736020	736433	+	GNAT_family_N-acetyltransferase	AL536_03445
AMF92546	736510	737658	-	PLP-dependent_aminotransferase_family_protein	AL536_03450
AMF92547	737770	738639	+	AraC_family_transcriptional_regulator	AL536_03455
AMF92548	738856	739335	-	peptide-methionine_(S)-S-oxide_reductase	AL536_03460
AMF92549	739462	740847	-	purine_permease	AL536_03465
AMF92550	741082	742008	-	allantoinase_PuuE	AL536_03470
AMF92551	742031	742762	-	Asp/Glu/hydantoin_racemase	AL536_03475
AMF92552	742766	743437	-	GntR_family_transcriptional_regulator	AL536_03480
AMF93368	743717	745159	+	amino_acid_transporter	AL536_03485
AMF92553	745433	746224	+	amino_acid_ABC_transporter_substrate-binding protein	AL536_03490
AMF92554	746240	746908	+	amino_acid_ABC_transporter_permease	AL536_03495
AMF92555	746921	747571	+	amino_acid_ABC_transporter_permease	AL536_03500
AMF92556	747558	748286	+	amino_acid_ABC_transporter_ATP-binding_protein	AL536_03505
AMF92557	748306	749124	+	MurR/RpiR_family_transcriptional_regulator	AL536_03510
AMF92558	749167	750165	+	bile_acid:sodium_symporter	AL536_03515
AMF92559	750256	751431	+	amidase	AL536_03520
AMF92560	751449	753014	+	gamma-glutamyltransferase_family_protein	AL536_03525
AMF92561	753016	754248	+	alanine--glyoxylate_aminotransferase_family protein	AL536_03530
AMF92562	754312	755550	+	allantoate_amidohydrolase	AL536_03535
AMF92563	755628	755912	-	hypothetical_protein	AL536_03540
AMF93369	756654	757889	-	hypothetical_protein	AL536_03545
AMF92564	757835	759217	-	guanine_deaminase	guaD
AMF92565	759219	759542	-	hydroxyisourate_hydrolase	uraH
AMF92566	759539	760030	-	2-oxo-4-hydroxy-4-carboxy-5-ureidoimidazoline decarboxylase	AL536_03560
AMF92567	760027	760908	-	xanthine_dehydrogenase_accessory_protein_XdhC	xdhC
AMF92568	760892	763270	-	xanthine_dehydrogenase_molybdopterin_binding subunit	xdhB
AMF92569	763263	764675	-	xanthine_dehydrogenase_small_subunit	xdhA
AMF92570	764773	765849	-	BMP_family_ABC_transporter_substrate-binding protein	AL536_03580
AMF92571	766226	767155	-	ABC_transporter_permease	AL536_03585
AMF92572	767155	768261	-	ABC_transporter_permease	AL536_03590
AMF92573	768254	769783	-	ABC_transporter_ATP-binding_protein	AL536_03595
AMF92574	770000	770641	+	TetR_family_transcriptional_regulator	AL536_03600
AMF92575	770710	771519	+	hypothetical_protein	AL536_03605
AMF93370	771564	772970	-	sensor_domain-containing_diguanylate_cyclase	AL536_03610
AMF92576	773283	774263	+	hypothetical_protein	AL536_03615
AMF92577	774254	775417	-	GGDEF_domain-containing_protein	AL536_03620
AMF92578	775737	776108	+	competence_protein_ComFB	AL536_03625
AMF92579	776133	776411	+	transcriptional_regulator	AL536_03630
AMF92580	776708	778255	+	NAD(P)(+)_transhydrogenase_(Re/Si-specific) subunit alpha	AL536_03635
AMF92581	778267	779643	+	NAD(P)(+)_transhydrogenase_(Re/Si-specific) subunit beta	AL536_03640
AMF92582	779774	781249	+	DUF3404_domain-containing_protein	AL536_03645
AMF92583	781224	781883	+	DNA-binding_response_regulator	AL536_03650
AMF92584	781887	782765	+	DUF2861_domain-containing_protein	AL536_03655
AMF92585	782826	783998	+	type_IX_secretion_system_membrane_protein	AL536_03660
AUV47397	784040	784198	+	YoaH_family_protein	AL536_22455
AMF92586	785285	785596	-	stress_response_translation_initiation_inhibitor YciH	yciH
AMF93371	785605	785979	-	DUF3319_domain-containing_protein	AL536_03670
AMF92587	786081	787049	+	integrase	AL536_03675
AMF92588	787033	788037	-	D-alanine--D-alanine_ligase	AL536_03680
AMF92589	788198	788782	-	cytochrome_C_biogenesis_protein_CcdA	AL536_03685
AMF92590	788999	791683	+	GNAT_family_N-acetyltransferase	AL536_03690
Table of Blast hits (query gene, subject gene, %identity, blast score, %coverage, e-value):
Vas1_1340_1455206-14	AMF92553	68	386	100	3e-107
Vas1_1341_1456011-14	AMF92554	76	354	100	9e-98
Vas1_1341_1456011-14	AMF92555	34	103	78.8288	4e-22
Vas1_1342_1456691-14	AMF92555	77	354	99.0741	1e-97
Vas1_1343_1457463-14	AMF92556	84	349	100	2e-96
Vas1_1344_1458095-14	AMF92557	53	308	101.111	1e-83
Vas1_1345_1458933-14	AMF92559	54	435	97.733	8e-122
Vas1_1346_1460123-14	AMF92560	70	761	99.6176	0
Vas1_1347_1461691-14	AMF92561	85	742	100.244	0
Vas1_1348_1462939-14	AMF92562	66	547	94.964	2e-155
Vas1_1349_1464197-14	AMF92575	39	180	82.6241	4e-45
>>
16. CP014032_7
Source: Vibrio fluvialis strain FDAARGOS_100 chromosome 2, complete sequence.
Number of proteins with BLAST hits to this cluster: 10
MultiGeneBlast score: 10.0
Cumulative Blast bit score: 4512
Table of genes, locations, strands and annotations of subject cluster:
AVH34753	1126909	1128057	-	MFS_transporter	AL475_20140
AVH34192	1128516	1129235	+	4-carboxymuconolactone_decarboxylase	AL475_20145
AVH34754	1129284	1129778	+	cupin_domain-containing_protein	AL475_20150
AVH34193	1129988	1131097	+	hypothetical_protein	AL475_20155
AVH34194	1131318	1131926	+	transcriptional_regulator	AL475_20160
AVH34195	1132004	1132522	-	23S_rRNA_methyltransferase	AL475_20165
AVH34196	1132754	1133854	+	DUF4172_domain-containing_protein	AL475_20170
AVH34197	1133965	1134744	+	PhzF_family_phenazine_biosynthesis_protein	AL475_20175
AVH34198	1134790	1135260	+	N-acetyltransferase	AL475_20180
AVH34199	1135298	1135756	+	GNAT_family_N-acetyltransferase	AL475_20185
AVH34200	1135841	1136284	+	DUF2000_domain-containing_protein	AL475_20190
AVH34201	1136577	1136990	+	GNAT_family_N-acetyltransferase	AL475_20195
AVH34202	1137068	1138216	-	PLP-dependent_aminotransferase_family_protein	AL475_20200
AVH34203	1138328	1139197	+	AraC_family_transcriptional_regulator	AL475_20205
AVH34204	1139413	1139892	-	methionine_sulfoxide_reductase_A	AL475_20210
AVH34205	1140020	1141405	-	xanthine_permease_XanP	AL475_20215
AVH34206	1141640	1142566	-	allantoinase_PuuE	AL475_20220
AVH34207	1142589	1143320	-	Asp/Glu/hydantoin_racemase	AL475_20225
AVH34208	1143324	1143995	-	GntR_family_transcriptional_regulator	AL475_20230
AVH34755	1144265	1145707	+	amino_acid_transporter	AL475_20235
AVH34209	1145981	1146772	+	amino_acid_ABC_transporter_substrate-binding protein	AL475_20240
AVH34210	1146788	1147456	+	amino_acid_ABC_transporter_permease	AL475_20245
AVH34211	1147469	1148119	+	amino_acid_ABC_transporter_permease	AL475_20250
AVH34212	1148106	1148834	+	amino_acid_ABC_transporter_ATP-binding_protein	AL475_20255
AVH34213	1148854	1149672	+	MurR/RpiR_family_transcriptional_regulator	AL475_20260
AVH34214	1149714	1150712	+	bile_acid:sodium_symporter	AL475_20265
AVH34215	1150803	1151978	+	amidase	AL475_20270
AVH34216	1151996	1153561	+	gamma-glutamyltransferase	AL475_20275
AVH34217	1153563	1154795	+	aminotransferase	AL475_20280
AVH34218	1154859	1156097	+	allantoate_amidohydrolase	AL475_20285
AVH34219	1156175	1156459	-	hypothetical_protein	AL475_20290
AVH34220	1157200	1158435	-	hypothetical_protein	AL475_20295
AVH34221	1158381	1159763	-	guanine_deaminase	guaD
AVH34222	1159765	1160088	-	hydroxyisourate_hydrolase	uraH
AVH34223	1160085	1160576	-	decarboxylase	AL475_20310
AVH34224	1160573	1161454	-	xanthine_dehydrogenase_accessory_protein_XdhC	xdhC
AVH34225	1161438	1163816	-	xanthine_dehydrogenase_molybdopterin_binding subunit	xdhB
AVH34226	1163809	1165221	-	xanthine_dehydrogenase_small_subunit	xdhA
AVH34227	1165318	1166394	-	BMP_family_ABC_transporter_substrate-binding protein	AL475_20330
AVH34228	1166813	1167742	-	ABC_transporter_permease	AL475_20335
AVH34229	1167742	1168848	-	sugar_ABC_transporter_permease	AL475_20340
AVH34230	1168841	1170370	-	ABC_transporter	AL475_20345
AVH34231	1170588	1171229	+	TetR_family_transcriptional_regulator	AL475_20350
AVH34232	1171253	1172107	+	hypothetical_protein	AL475_20355
AVH34756	1172152	1173558	-	sensor_domain-containing_diguanylate_cyclase	AL475_20360
AVH34233	1173871	1174851	+	hypothetical_protein	AL475_20365
AVH34757	1174842	1176005	-	GGDEF_domain-containing_protein	AL475_20370
AVH34234	1176325	1176696	+	competence_protein_ComFB	AL475_20375
AVH34235	1176721	1176999	+	transcriptional_regulator	AL475_20380
AVH34236	1177296	1178843	+	NAD(P)(+)_transhydrogenase_(Re/Si-specific) subunit alpha	AL475_20385
AVH34237	1178855	1180231	+	NAD(P)(+)_transhydrogenase_(Re/Si-specific) subunit beta	AL475_20390
AVH34238	1180362	1181837	+	DUF3404_domain-containing_protein	AL475_20395
AVH34239	1181812	1182471	+	DNA-binding_response_regulator	AL475_20400
AVH34240	1182475	1183353	+	DUF2861_domain-containing_protein	AL475_20405
AVH34241	1183414	1184586	+	conjugal_transfer_protein_TraF	AL475_20410
AVH34242	1184629	1184787	+	YoaH_family_protein	AL475_20415
AVH34243	1185907	1186218	-	stress_response_translation_initiation_inhibitor YciH	yciH
AVH34758	1186227	1186601	-	DUF3319_domain-containing_protein	AL475_20425
AVH34244	1186703	1187671	+	integrase	AL475_20430
AVH34245	1187655	1188659	-	D-alanine--D-alanine_ligase	AL475_20435
AVH34246	1188820	1189404	-	cytochrome_C_biogenesis_protein_CcdA	AL475_20440
AVH34247	1189621	1192305	+	protein_acetyltransferase	AL475_20445
Table of Blast hits (query gene, subject gene, %identity, blast score, %coverage, e-value):
Vas1_1340_1455206-14	AVH34209	68	385	100	5e-107
Vas1_1341_1456011-14	AVH34210	76	355	100	3e-98
Vas1_1341_1456011-14	AVH34211	34	103	78.8288	4e-22
Vas1_1342_1456691-14	AVH34211	77	351	99.0741	8e-97
Vas1_1343_1457463-14	AVH34212	83	345	100	3e-95
Vas1_1344_1458095-14	AVH34213	53	308	101.111	6e-84
Vas1_1345_1458933-14	AVH34215	54	434	97.733	2e-121
Vas1_1346_1460123-14	AVH34216	70	763	99.6176	0
Vas1_1347_1461691-14	AVH34217	85	740	100.244	0
Vas1_1348_1462939-14	AVH34218	65	547	94.964	2e-155
Vas1_1349_1464197-14	AVH34232	40	181	83.3333	2e-45
>>
17. NZ_AMRX01000008_2
Source: Gayadomonas joobiniege G7 plasmid pG7, whole genome shotgun sequence.
Number of proteins with BLAST hits to this cluster: 10
MultiGeneBlast score: 10.0
Cumulative Blast bit score: 4463
Table of genes, locations, strands and annotations of subject cluster:
WP_017446538	129735	130997	+	HAMP_domain-containing_histidine_kinase	C727_RS18700
WP_017446539	130990	131523	+	response_regulator	C727_RS0115355
WP_017446540	131584	133422	+	hypothetical_protein	C727_RS0115360
WP_017446541	133489	134673	+	DUF3095_domain-containing_protein	C727_RS0115365
WP_017446542	134762	135910	+	hypothetical_protein	C727_RS0115370
WP_017446544	136165	136683	+	hypothetical_protein	C727_RS0115380
WP_017446545	136836	137111	+	HU_family_DNA-binding_protein	C727_RS0115385
WP_017446546	137163	137528	+	hypothetical_protein	C727_RS0115390
WP_017446547	137604	138497	+	hypothetical_protein	C727_RS0115395
WP_017446548	138503	139438	-	hypothetical_protein	C727_RS0115400
WP_017446549	139442	140671	-	ParA_family_protein	C727_RS0115405
WP_017446550	141317	142810	+	RepB_family_plasmid_replication_initiator protein	C727_RS0115410
WP_017446551	142928	144100	+	helix-turn-helix_domain-containing_protein	C727_RS0115415
WP_017446552	144165	145052	+	hypothetical_protein	C727_RS0115420
WP_017446553	145060	145797	+	hypothetical_protein	C727_RS19180
WP_017446554	145814	146692	+	hypothetical_protein	C727_RS0115430
WP_017446555	146689	147894	+	metabolite_traffic_protein_EboE	eboE
WP_017446556	147904	149310	+	alkaline_phosphatase_family_protein	C727_RS0115440
WP_017446557	149398	151812	-	hypothetical_protein	C727_RS0115445
WP_017446558	152140	153219	+	family_43_glycosylhydrolase	C727_RS0115450
WP_017446559	153245	154177	+	sugar_kinase	C727_RS0115455
WP_017446560	154186	155652	+	decarboxylating_NADP(+)-dependent phosphogluconate dehydrogenase	gnd
WP_017446561	155772	159389	-	hypothetical_protein	C727_RS19185
WP_017446562	159454	160065	-	hypothetical_protein	C727_RS0115475
WP_017446563	160283	161095	-	hypothetical_protein	C727_RS0115480
WP_017446564	161099	162211	-	alcohol_dehydrogenase_catalytic domain-containing protein	C727_RS0115485
WP_017446565	162353	163228	+	AraC_family_transcriptional_regulator	C727_RS0115490
C727_RS19410	164038	164831	-	transposase	no_locus_tag
WP_081579241	164911	165081	+	transposase	C727_RS19415
WP_017446567	165104	165241	-	IS66_family_insertion_sequence_hypothetical protein	C727_RS19595
WP_017446568	165238	165546	-	IS66_family_insertion_sequence_hypothetical protein	C727_RS0115510
WP_017446570	165973	166221	-	hypothetical_protein	C727_RS0115520
WP_017446571	166523	168088	+	IS1182_family_transposase	C727_RS0115525
WP_155949284	168334	169080	+	hypothetical_protein	C727_RS0115530
WP_081579242	169304	169621	+	hypothetical_protein	C727_RS19420
WP_017446573	169557	170102	-	redoxin_family_protein	C727_RS0115535
WP_017446574	170115	170696	-	flavodoxin	C727_RS0115540
WP_017446575	170821	171183	+	helix-turn-helix_transcriptional_regulator	C727_RS0115545
WP_017446576	171457	171843	-	energy_transducer_TonB	C727_RS18725
WP_017446578	172100	172759	-	HAD_family_phosphatase	C727_RS0115560
C727_RS0115565	172825	175074	-	FdhF/YdeP_family_oxidoreductase	no_locus_tag
fdhD	175085	175813	-	formate_dehydrogenase_accessory sulfurtransferase FdhD	no_locus_tag
WP_017446581	175944	176825	+	LysR_family_transcriptional_regulator	C727_RS0115575
WP_017446582	176829	177437	-	GntR_family_transcriptional_regulator	C727_RS0115580
WP_017446583	177800	178951	+	mandelate_racemase/muconate_lactonizing_enzyme family protein	C727_RS0115585
WP_017446584	178963	179991	+	alcohol_dehydrogenase_catalytic domain-containing protein	C727_RS0115590
WP_040459372	179995	180765	+	SDR_family_oxidoreductase	C727_RS0115595
WP_017446586	180770	182221	+	aldehyde_dehydrogenase	aldA
WP_017446587	182349	183221	+	hypothetical_protein	C727_RS0115605
WP_017446589	183592	187239	+	TonB-dependent_receptor	C727_RS0115615
WP_017446590	187302	189368	+	hypothetical_protein	C727_RS0115620
WP_017446591	189465	191021	+	tryptophan_7-halogenase	C727_RS0115625
WP_017446592	191058	191774	+	SapC_family_protein	C727_RS0115630
WP_017446593	191746	192462	-	hypothetical_protein	C727_RS0115635
WP_017446594	192707	193771	+	efflux_RND_transporter_periplasmic_adaptor subunit	C727_RS18730
WP_017446595	193775	196873	+	efflux_RND_transporter_permease_subunit	C727_RS0115645
WP_017446596	196969	197403	+	ferritin-like_domain-containing_protein	C727_RS0115650
WP_017446597	197400	198428	-	LacI_family_transcriptional_regulator	C727_RS0115655
WP_017446598	198645	199130	+	gluconokinase	C727_RS0115660
WP_017446599	199127	200416	+	DUF2088_domain-containing_protein	C727_RS0115665
WP_017446600	200406	201674	+	LarC_family_nickel_insertion_protein	C727_RS18735
WP_017446601	201658	202479	+	hypothetical_protein	C727_RS0115675
Table of Blast hits (query gene, subject gene, %identity, blast score, %coverage, e-value):
Vas1_1308_1402890-14	WP_017446586	57	566	97.9167	3e-161
Vas1_1310_1407068-14	WP_017446558	82	610	99.4444	2e-174
Vas1_1312_1409962-14	WP_017446557	40	604	83.5084	4e-172
Vas1_1313_1412905-14	WP_017446557	32	375	78.9157	2e-103
Vas1_1314_1416090-14	WP_017446557	40	593	80.6186	1e-168
Vas1_1317_1423172-14	WP_017446557	48	756	100.806	0
Vas1_1323_1431740-14	WP_017446584	34	181	84.0237	2e-45
Vas1_1327_1436204-14	WP_017446583	56	418	100.829	1e-116
Vas1_1328_1437485-14	WP_017446561	32	102	17.2608	5e-21
Vas1_1335_1448550-14	WP_017446586	33	258	95.935	2e-68
>>
18. CP026604_2
Source: Catenovulum sp. CCB-QB4 chromosome, complete genome.
Number of proteins with BLAST hits to this cluster: 9
MultiGeneBlast score: 9.0
Cumulative Blast bit score: 4356
Table of genes, locations, strands and annotations of subject cluster:
AWB65058	211368	213899	+	chemotaxis_protein_CheR	C2869_00755
AWB65059	213899	214903	+	hypothetical_protein	C2869_00760
AWB65060	215208	215618	+	hypothetical_protein	C2869_00765
AWB65061	215622	216893	+	hypothetical_protein	C2869_00770
AWB65062	216936	219650	+	hypothetical_protein	C2869_00775
AWB65063	219652	223491	+	hypothetical_protein	C2869_00780
AWB65064	223497	224711	+	diguanylate_phosphodiesterase	C2869_00785
AWB65065	224718	225137	+	hypothetical_protein	C2869_00790
AWB65066	225275	225556	-	hypothetical_protein	C2869_00795
AWB65067	225754	226593	-	LysR_family_transcriptional_regulator	C2869_00800
AWB65068	226711	227613	+	30S_ribosomal_protein_S6--L-glutamate_ligase	C2869_00805
AWB65069	227636	228670	+	succinylglutamate_desuccinylase	C2869_00810
AWB65070	228661	229110	+	ATP-dependent_zinc_protease	C2869_00815
AWB65071	229178	229984	+	hypothetical_protein	C2869_00820
AWB65072	230001	230915	+	hypothetical_protein	C2869_00825
AWB65073	231098	233146	-	hypothetical_protein	C2869_00830
AWB65074	233314	235731	-	agarase	C2869_00835
AWB65075	236060	237142	+	glycosyl_hydrolase	C2869_00840
AWB65076	237427	238539	+	rhamnose/proton_symporter_RhaT	C2869_00845
AWB65077	238559	239608	+	galactose-1-epimerase	C2869_00850
AWB65078	239814	240953	+	uroporphyrinogen_decarboxylase	C2869_00855
AWB65079	240967	241989	+	Zn-dependent_alcohol_dehydrogenase	C2869_00860
AWB65080	242067	242831	+	2-deoxy-D-gluconate_3-dehydrogenase	C2869_00865
AWB65081	242837	244300	+	aldehyde_dehydrogenase	C2869_00870
AWB65082	244429	245598	-	MFS_transporter	C2869_00875
AWB68864	245903	248359	+	glycoside_hydrolase_family_42	C2869_00880
AWB68865	248644	249339	+	phosphoglycolate_phosphatase	C2869_00885
AWB65083	249363	250877	+	FAD-dependent_oxidoreductase	C2869_00890
AWB65084	250892	251692	-	hypothetical_protein	C2869_00895
AWB65085	252169	253974	+	hypothetical_protein	C2869_00900
AWB65086	253990	257217	+	peptide_chain_release_factor_2	C2869_00905
AWB65087	257235	258464	+	hypothetical_protein	C2869_00910
AWB65088	258531	259469	-	hypothetical_protein	C2869_00915
AWB65089	259788	262616	+	excinuclease_ABC_subunit_UvrA	C2869_00920
AWB65090	262849	265065	-	NADP-dependent_isocitrate_dehydrogenase	C2869_00925
Table of Blast hits (query gene, subject gene, %identity, blast score, %coverage, e-value):
Vas1_1308_1402890-14	AWB65081	55	553	98.125	3e-157
Vas1_1310_1407068-14	AWB65075	83	623	99.7222	2e-178
Vas1_1312_1409962-14	AWB65074	41	590	76.0504	5e-168
Vas1_1313_1412905-14	AWB65074	32	360	76.8072	1e-98
Vas1_1314_1416090-14	AWB65074	42	588	73.5052	3e-167
Vas1_1317_1423172-14	AWB65074	48	756	100.672	0
Vas1_1323_1431740-14	AWB65079	34	168	82.5444	2e-41
Vas1_1327_1436204-14	AWB65078	63	458	98.6188	1e-128
Vas1_1335_1448550-14	AWB65081	33	260	95.935	6e-69
>>
19. CP018681_8
Source: Vibrio harveyi isolate QT520 chromosome 2, complete sequence.
Number of proteins with BLAST hits to this cluster: 9
MultiGeneBlast score: 9.0
Cumulative Blast bit score: 3843
Table of genes, locations, strands and annotations of subject cluster:
APP08070	1258050	1258796	-	outer_membrane_lipoprotein-sorting_protein	BG259_22665
APP08071	1258914	1260356	-	sensor_domain-containing_diguanylate_cyclase	BG259_22670
APP08072	1260720	1261883	+	hypothetical_protein	BG259_22675
APP08073	1261880	1262146	-	alternative_ribosome-rescue_factor_A	BG259_22680
APP08074	1262515	1262724	+	cold-shock_protein	BG259_22685
APP08075	1262798	1263343	+	hypothetical_protein	BG259_22690
APP08076	1263330	1263872	+	hypothetical_protein	BG259_22695
APP08077	1264832	1265014	+	conjugal_transfer_protein_TraY	BG259_22700
APP08078	1265062	1265421	+	conjugal_transfer_protein_TraY	BG259_22705
APP08079	1265411	1266013	+	hypothetical_protein	BG259_22710
APP08080	1266028	1266345	+	conjugal_transfer_protein	BG259_22715
APP08081	1266348	1266719	+	conjugal_transfer_protein_TraD	BG259_22720
APP08082	1266682	1269012	+	conjugal_transfer_protein_TraE	BG259_22725
APP08083	1269015	1269683	+	conjugal_transfer_protein_TrbJ	BG259_22730
[truncated: 12,302 more rows]

## Sheet: Vas2_3GHs
Related to Figure.3C Bottom panel# The output of MultiGeneBLAST v1.1.14 concerning the comparions of β-agarases containing regions on Vas2 (Three GH16s) among the investigated 46 genomes.
Table of genes, locations, strands and annotations of query cluster:
Vas2_910_1027312-102	0	1719	+	Vas2_910_1027312-102	Vas2_910_1027312-102
Vas2_911_1029067-103	1819	2791	+	Vas2_911_1029067-103	Vas2_911_1029067-103
Vas2_912_1030046-103	2891	4025	+	Vas2_912_1030046-103	Vas2_912_1030046-103
Vas2_913_1031504-103	4125	5103	+	Vas2_913_1031504-103	Vas2_913_1031504-103
Vas2_914_1032803-103	5203	5962	+	Vas2_914_1032803-103	Vas2_914_1032803-103
Vas2_915_1033643-103	6062	8057	+	Vas2_915_1033643-103	Vas2_915_1033643-103
Vas2_916_1035799-103	8157	9090	+	Vas2_916_1035799-103	Vas2_916_1035799-103
Vas2_917_1036862-103	9190	10105	+	Vas2_917_1036862-103	Vas2_917_1036862-103
Vas2_918_1037832-103	10205	11162	+	Vas2_918_1037832-103	Vas2_918_1037832-103
Vas2_919_1038919-103	11262	12084	+	Vas2_919_1038919-103	Vas2_919_1038919-103
Vas2_920_1039748-104	12184	12943	+	Vas2_920_1039748-104	Vas2_920_1039748-104
Vas2_921_1040588-104	13043	13799	+	Vas2_921_1040588-104	Vas2_921_1040588-104
Vas2_922_1041835-104	13899	14814	+	Vas2_922_1041835-104	Vas2_922_1041835-104
Vas2_923_1042887-104	14914	15586	+	Vas2_923_1042887-104	Vas2_923_1042887-104
Vas2_924_1043819-104	15686	16889	+	Vas2_924_1043819-104	Vas2_924_1043819-104
Vas2_925_1045421-104	16989	18570	+	Vas2_925_1045421-104	Vas2_925_1045421-104
Vas2_926_1047056-104	18670	20200	+	Vas2_926_1047056-104	Vas2_926_1047056-104
Vas2_927_1048861-104	20300	21209	+	Vas2_927_1048861-104	Vas2_927_1048861-104
Vas2_928_1050076-105	21309	23184	+	Vas2_928_1050076-105	Vas2_928_1050076-105
Vas2_929_1052442-105	23284	25165	+	Vas2_929_1052442-105	Vas2_929_1052442-105
Vas2_930_1054963-105	25265	25631	+	Vas2_930_1054963-105	Vas2_930_1054963-105
Vas2_931_1055328-105	25731	25998	+	Vas2_931_1055328-105	Vas2_931_1055328-105
Vas2_932_1055651-105	26098	26908	+	Vas2_932_1055651-105	Vas2_932_1055651-105
Vas2_933_1056609-105	27008	27626	+	Vas2_933_1056609-105	Vas2_933_1056609-105
Vas2_934_1057289-105	27726	28947	+	Vas2_934_1057289-105	Vas2_934_1057289-105
Vas2_935_1058702-105	29047	29770	+	Vas2_935_1058702-105	Vas2_935_1058702-105
Vas2_936_1059499-106	29870	30440	+	Vas2_936_1059499-106	Vas2_936_1059499-106
Vas2_937_1060170-106	30540	31080	+	Vas2_937_1060170-106	Vas2_937_1060170-106
Vas2_938_1060783-106	31180	31780	+	Vas2_938_1060783-106	Vas2_938_1060783-106
Vas2_939_1061396-106	31880	32828	+	Vas2_939_1061396-106	Vas2_939_1061396-106
Vas2_940_1062366-106	32928	34071	+	Vas2_940_1062366-106	Vas2_940_1062366-106
Significant hits:
1. Vas2_4	No definition line found.
2. BBMQ01000292_0	Vibrio sp. C7 DNA, contig: contig00008, strain: JCM 19233, whole genome shotgun sequence.
3. NZ_KE386909_1	Aliagarivorans marinus DSM 23064 G461DRAFT_scaffold00003.3, whole genome shotgun sequence.
4. NZ_AUBY01000022_0	Aliagarivorans marinus DSM 23064 G461DRAFT_scaffold00017.17_C, whole genome shotgun sequence.
5. BBSC01000003_1	Vibrio ishigakensis DNA, contig00003, strain: JCM19241, whole genome shotgun sequence.
6. NZ_KB890423_0	Lewinella persica DSM 23188 B036DRAFT_scaffold_18.19, whole genome shotgun sequence.
7. NZ_MUZU01000010_1	Colwellia agarivorans strain QM50 contig10, whole genome shotgun sequence.
8. CP018681_13	Vibrio harveyi isolate QT520 chromosome 2, complete sequence.
9. NZ_CP014039_5	Vibrio harveyi strain FDAARGOS_107 chromosome 2, complete sequence.
10. CP003242_5	Vibrio sp. EJY3 chromosome 2, complete sequence.
11. BBSC01000006_0	Vibrio ishigakensis DNA, contig00006, strain: JCM19241, whole genome shotgun sequence.
12. NZ_AUBY01000008_1	Aliagarivorans marinus DSM 23064 G461DRAFT_scaffold00004.4_C, whole genome shotgun sequence.
13. CP005973_4	Photobacterium gaetbulicola Gung47 chromosome 1, complete sequence.
14. NZ_FLQZ01000176_0	Vibrio celticus strain CECT 7224, whole genome shotgun sequence.
15. BBMQ01000229_0	Vibrio sp. C7 DNA, contig: contig00052, strain: JCM 19233, whole genome shotgun sequence.
16. NZ_CP009618_2	Vibrio coralliilyticus strain RE98 chromosome 2, complete sequence.
17. CP026604_1	Catenovulum sp. CCB-QB4 chromosome, complete genome.
18. CP005973_9	Photobacterium gaetbulicola Gung47 chromosome 1, complete sequence.
19. NZ_BBMR01000001_2	Vibrio maritimus strain JCM 19235, whole genome shotgun sequence.
20. Vas2_2	No definition line found.
21. CP005974_8	Photobacterium gaetbulicola Gung47 chromosome 2, complete sequence.
22. NZ_CP014039_13	Vibrio harveyi strain FDAARGOS_107 chromosome 2, complete sequence.
23. CP018681_4	Vibrio harveyi isolate QT520 chromosome 2, complete sequence.
24. NC_022359_6	Vibrio alginolyticus NBRC 15630 = ATCC 17749 chromosome 2, complete sequence.
25. NC_009784_3	Vibrio campbellii ATCC BAA-1116 chromosome II, complete sequence.
26. NC_004605_7	Vibrio parahaemolyticus RIMD 2210633 chromosome 2, complete sequence.
27. NC_022359_8	Vibrio alginolyticus NBRC 15630 = ATCC 17749 chromosome 2, complete sequence.
28. CP018681_6	Vibrio harveyi isolate QT520 chromosome 2, complete sequence.
29. CP003242_3	Vibrio sp. EJY3 chromosome 2, complete sequence.
30. NC_009784_1	Vibrio campbellii ATCC BAA-1116 chromosome II, complete sequence.
31. NZ_CP014039_11	Vibrio harveyi strain FDAARGOS_107 chromosome 2, complete sequence.
32. NZ_CP009355_4	Vibrio tubiashii ATCC 19109 chromosome 2, complete sequence.
33. NZ_AEVS01000076_0	Vibrio brasiliensis LMG 20546 VIBR0546_48, whole genome shotgun sequence.
34. NZ_AEVT01000056_0	Vibrio sinaloensis DSM 21326 VISI1226_20, whole genome shotgun sequence.
35. NZ_JRWM01000026_0	Vibrio variabilis strain T01 Contig26, whole genome shotgun sequence.
36. NZ_LHPI01000001_5	Vibrio hepatarius strain DSM 19134 contig0001, whole genome shotgun sequence.
37. NZ_CP014637_5	Vibrio vulnificus strain CECT 4999 chromosome II, complete sequence.
38. AFWH01000011_0	Vibrio orientalis CIP 102891 = ATCC 33934 strain CIP 102891 VIOR3934_13, whole genome shotgun sequence.
39. NZ_FLQZ01000118_0	Vibrio celticus strain CECT 7224, whole genome shotgun sequence.
40. NZ_LNQX01000035_0	Vibrio splendidus strain NCCB 53037 NODE_35, whole genome shotgun sequence.
41. CP014034_3	Vibrio fluvialis strain ATCC 33809 chromosome 1, complete sequence.
42. CP014032_6	Vibrio fluvialis strain FDAARGOS_100 chromosome 2, complete sequence.
43. CP033578_0	Vibrio mediterranei strain 117-T6 chromosome 2, complete sequence.
44. NZ_BATJ01000007_0	Vibrio proteolyticus NBRC 13287, whole genome shotgun sequence.
45. FNVG01000001_2	Vibrio hangzhouensis strain CGMCC 1.7062 genome assembly, contig: Ga0070180_101, whole genome shotgun sequence.
46. CP005974_6	Photobacterium gaetbulicola Gung47 chromosome 2, complete sequence.
47. NC_015844_8	Zobellia galactanivorans strain DsiJT chromosome, complete genome.
48. NZ_AEIU01000088_0	Vibrio caribbeanicus ATCC BAA-2122 VIBC2010_57, whole genome shotgun sequence.
49. NZ_CP013021_0	Agarivorans gilvus strain WH0801, complete genome.
50. NZ_FOFB01000021_0	Lewinella agarilytica strain DSM 24740, whole genome shotgun sequence.
51. CP033578_4	Vibrio mediterranei strain 117-T6 chromosome 2, complete sequence.
52. NZ_CP009618_1	Vibrio coralliilyticus strain RE98 chromosome 2, complete sequence.
53. NZ_LNQX01000003_0	Vibrio splendidus strain NCCB 53037 NODE_3, whole genome shotgun sequence.
54. NZ_FLQZ01000034_0	Vibrio celticus strain CECT 7224, whole genome shotgun sequence.
55. NZ_BATJ01000005_0	Vibrio proteolyticus NBRC 13287, whole genome shotgun sequence.
56. CP014032_8	Vibrio fluvialis strain FDAARGOS_100 chromosome 2, complete sequence.
57. CP014034_5	Vibrio fluvialis strain ATCC 33809 chromosome 1, complete sequence.
58. NZ_AEVS01000101_0	Vibrio brasiliensis LMG 20546 VIBR0546_78, whole genome shotgun sequence.
59. NC_004605_5	Vibrio parahaemolyticus RIMD 2210633 chromosome 2, complete sequence.
60. AFWH01000040_0	Vibrio orientalis CIP 102891 = ATCC 33934 strain CIP 102891 VIOR3934_4, whole genome shotgun sequence.
61. NZ_CP009355_5	Vibrio tubiashii ATCC 19109 chromosome 2, complete sequence.
62. NZ_LHPI01000001_8	Vibrio hepatarius strain DSM 19134 contig0001, whole genome shotgun sequence.
63. NZ_AEVT01000003_0	Vibrio sinaloensis DSM 21326 VISI1226_101, whole genome shotgun sequence.
64. NZ_JRWM01000033_0	Vibrio variabilis strain T01 Contig33, whole genome shotgun sequence.
65. NZ_JYJP01000054_0	Vibrio mexicanus strain CAIM 1540 contig00064, whole genome shotgun sequence.
66. NZ_CP020472_5	Shewanella japonica strain KCTC 22435 chromosome, complete genome.
67. BBSC01000005_0	Vibrio ishigakensis DNA, contig00005, strain: JCM19241, whole genome shotgun sequence.
68. NZ_CP020472_9	Shewanella japonica strain KCTC 22435 chromosome, complete genome.
69. CP005973_13	Photobacterium gaetbulicola Gung47 chromosome 1, complete sequence.
70. CP026604_2	Catenovulum sp. CCB-QB4 chromosome, complete genome.
71. CP026604_0	Catenovulum sp. CCB-QB4 chromosome, complete genome.
72. CP033578_9	Vibrio mediterranei strain 117-T6 chromosome 2, complete sequence.
73. NZ_BATL01000055_0	Vibrio azureus NBRC 104587, whole genome shotgun sequence.
74. POWH01000136_0	Vibrio agarivorans strain CAIM 1911 contig_136, whole genome shotgun sequence.
75. NZ_JYJP01000016_1	Vibrio mexicanus strain CAIM 1540 contig00025, whole genome shotgun sequence.
76. NZ_CP014637_3	Vibrio vulnificus strain CECT 4999 chromosome II, complete sequence.
77. NZ_AMRX01000008_4	Gayadomonas joobiniege G7 plasmid pG7, whole genome shotgun sequence.
78. CP003241_6	Vibrio sp. EJY3 chromosome 1, complete sequence.
79. AFWH01000010_1	Vibrio orientalis CIP 102891 = ATCC 33934 strain CIP 102891 VIOR3934_12, whole genome shotgun sequence.
80. NZ_AEVT01000093_0	Vibrio sinaloensis DSM 21326 VISI1226_56, whole genome shotgun sequence.
81. NZ_CP013021_5	Agarivorans gilvus strain WH0801, complete genome.
82. NZ_CP009355_6	Vibrio tubiashii ATCC 19109 chromosome 2, complete sequence.
83. NZ_BBMR01000001_3	Vibrio maritimus strain JCM 19235, whole genome shotgun sequence.
84. NZ_CP014039_4	Vibrio harveyi strain FDAARGOS_107 chromosome 2, complete sequence.
85. NC_022359_0	Vibrio alginolyticus NBRC 15630 = ATCC 17749 chromosome 2, complete sequence.
86. NC_015844_1	Zobellia galactanivorans strain DsiJT chromosome, complete genome.
87. CP033578_11	Vibrio mediterranei strain 117-T6 chromosome 2, complete sequence.
88. NZ_LHPI01000006_0	Vibrio hepatarius strain DSM 19134 contig0006, whole genome shotgun sequence.
89. CP033578_10	Vibrio mediterranei strain 117-T6 chromosome 2, complete sequence.
90. NC_004605_11	Vibrio parahaemolyticus RIMD 2210633 chromosome 2, complete sequence.
91. NZ_BATJ01000013_1	Vibrio proteolyticus NBRC 13287, whole genome shotgun sequence.
92. NZ_LNQX01000015_1	Vibrio splendidus strain NCCB 53037 NODE_15, whole genome shotgun sequence.
93. NZ_FLQZ01000002_0	Vibrio celticus strain CECT 7224, whole genome shotgun sequence.
94. BBSC01000004_1	Vibrio ishigakensis DNA, contig00004, strain: JCM19241, whole genome shotgun sequence.
95. NC_004605_10	Vibrio parahaemolyticus RIMD 2210633 chromosome 2, complete sequence.
96. CP033577_0	Vibrio mediterranei strain 117-T6 chromosome 1, complete sequence.
97. CP005973_6	Photobacterium gaetbulicola Gung47 chromosome 1, complete sequence.
98. NZ_AMRX01000008_6	Gayadomonas joobiniege G7 plasmid pG7, whole genome shotgun sequence.
99. NZ_AMRX01000008_3	Gayadomonas joobiniege G7 plasmid pG7, whole genome shotgun sequence.
100. NC_022359_5	Vibrio alginolyticus NBRC 15630 = ATCC 17749 chromosome 2, complete sequence.
101. BARX01000027_0	Agarivorans albus MKT 106 DNA, contig: contig00027, whole genome shotgun sequence.
102. CP018681_1	Vibrio harveyi isolate QT520 chromosome 2, complete sequence.
103. NZ_CP014039_15	Vibrio harveyi strain FDAARGOS_107 chromosome 2, complete sequence.
104. NC_004605_9	Vibrio parahaemolyticus RIMD 2210633 chromosome 2, complete sequence.
105. NZ_JYJP01000060_0	Vibrio mexicanus strain CAIM 1540 contig00071, whole genome shotgun sequence.
106. NZ_CP013926_1	Alteromonas stellipolaris strain LMG 21861, complete genome.
107. CP005973_3	Photobacterium gaetbulicola Gung47 chromosome 1, complete sequence.
108. NZ_FLQZ01000063_0	Vibrio celticus strain CECT 7224, whole genome shotgun sequence.
109. CP033577_1	Vibrio mediterranei strain 117-T6 chromosome 1, complete sequence.
110. BBSC01000004_0	Vibrio ishigakensis DNA, contig00004, strain: JCM19241, whole genome shotgun sequence.
111. Vas2_1	No definition line found.
112. NZ_CP009618_3	Vibrio coralliilyticus strain RE98 chromosome 2, complete sequence.
113. CP003241_3	Vibrio sp. EJY3 chromosome 1, complete sequence.
114. NZ_LNQX01000003_4	Vibrio splendidus strain NCCB 53037 NODE_3, whole genome shotgun sequence.
115. CP033578_3	Vibrio mediterranei strain 117-T6 chromosome 2, complete sequence.
116. CP033578_13	Vibrio mediterranei strain 117-T6 chromosome 2, complete sequence.
117. NZ_BBMR01000001_5	Vibrio maritimus strain JCM 19235, whole genome shotgun sequence.
118. NZ_AUBY01000010_1	Aliagarivorans marinus DSM 23064 G461DRAFT_scaffold00006.6_C, whole genome shotgun sequence.
119. NZ_MUZU01000012_0	Colwellia agarivorans strain QM50 contig12, whole genome shotgun sequence.
120. NZ_AEVS01000077_2	Vibrio brasiliensis LMG 20546 VIBR0546_49, whole genome shotgun sequence.
121. FNVG01000002_0	Vibrio hangzhouensis strain CGMCC 1.7062 genome assembly, contig: Ga0070180_102, whole genome shotgun sequence.
122. NZ_BBMR01000002_2	Vibrio maritimus strain JCM 19235, whole genome shotgun sequence.
123. NC_009783_7	Vibrio campbellii ATCC BAA-1116 chromosome I, complete sequence.
124. NZ_CP009618_0	Vibrio coralliilyticus strain RE98 chromosome 2, complete sequence.
125. BBMQ01000287_0	Vibrio sp. C7 DNA, contig: contig00025, strain: JCM 19233, whole genome shotgun sequence.
126. NZ_JRWM01000016_1	Vibrio variabilis strain T01 Contig16, whole genome shotgun sequence.
127. NZ_LHPI01000019_0	Vibrio hepatarius strain DSM 19134 contig0019, whole genome shotgun sequence.
128. FNVG01000004_1	Vibrio hangzhouensis strain CGMCC 1.7062 genome assembly, contig: Ga0070180_104, whole genome shotgun sequence.
129. CP033578_2	Vibrio mediterranei strain 117-T6 chromosome 2, complete sequence.
130. NZ_CP020472_0	Shewanella japonica strain KCTC 22435 chromosome, complete genome.
131. NZ_CP014039_10	Vibrio harveyi strain FDAARGOS_107 chromosome 2, complete sequence.
132. CP018681_7	Vibrio harveyi isolate QT520 chromosome 2, complete sequence.
133. NZ_CP014039_14	Vibrio harveyi strain FDAARGOS_107 chromosome 2, complete sequence.
134. CP018681_3	Vibrio harveyi isolate QT520 chromosome 2, complete sequence.
135. CP014032_0	Vibrio fluvialis strain FDAARGOS_100 chromosome 2, complete sequence.
136. CP014034_6	Vibrio fluvialis strain ATCC 33809 chromosome 1, complete sequence.
137. CP003241_7	Vibrio sp. EJY3 chromosome 1, complete sequence.
138. NZ_KB890444_0	Lewinella persica DSM 23188 B036DRAFT_scaffold_37.38, whole genome shotgun sequence.
139. NC_022359_2	Vibrio alginolyticus NBRC 15630 = ATCC 17749 chromosome 2, complete sequence.
140. NC_009784_8	Vibrio campbellii ATCC BAA-1116 chromosome II, complete sequence.
141. CP003241_9	Vibrio sp. EJY3 chromosome 1, complete sequence.
142. AFWH01000073_0	Vibrio orientalis CIP 102891 = ATCC 33934 strain CIP 102891 VIOR3934_7, whole genome shotgun sequence.
143. NZ_LNQX01000015_0	Vibrio splendidus strain NCCB 53037 NODE_15, whole genome shotgun sequence.
144. BBSC01000002_0	Vibrio ishigakensis DNA, contig00002, strain: JCM19241, whole genome shotgun sequence.
145. NZ_AEVT01000058_0	Vibrio sinaloensis DSM 21326 VISI1226_22, whole genome shotgun sequence.
146. CP003242_0	Vibrio sp. EJY3 chromosome 2, complete sequence.
147. NZ_BBMR01000002_1	Vibrio maritimus strain JCM 19235, whole genome shotgun sequence.
148. NC_009783_6	Vibrio campbellii ATCC BAA-1116 chromosome I, complete sequence.
149. NC_015844_2	Zobellia galactanivorans strain DsiJT chromosome, complete genome.
150. NZ_CP014039_3	Vibrio harveyi strain FDAARGOS_107 chromosome 2, complete sequence.
151. BARX01000029_0	Agarivorans albus MKT 106 DNA, contig: contig00029, whole genome shotgun sequence.
152. BARX01000020_0	Agarivorans albus MKT 106 DNA, contig: contig00020, whole genome shotgun sequence.
153. NC_015844_9	Zobellia galactanivorans strain DsiJT chromosome, complete genome.
154. CP014035_0	Vibrio fluvialis strain ATCC 33809 chromosome 2, complete sequence.
155. NZ_BBMR01000005_0	Vibrio maritimus strain JCM 19235, whole genome shotgun sequence.
156. CP014033_6	Vibrio fluvialis strain FDAARGOS_100 chromosome 1, complete sequence.
157. NZ_CP013021_3	Agarivorans gilvus strain WH0801, complete genome.
158. NZ_KE386908_0	Aliagarivorans marinus DSM 23064 G461DRAFT_scaffold00002.2, whole genome shotgun sequence.
159. AFWH01000010_0	Vibrio orientalis CIP 102891 = ATCC 33934 strain CIP 102891 VIOR3934_12, whole genome shotgun sequence.
160. NZ_BBMR01000015_0	Vibrio maritimus strain JCM 19235, whole genome shotgun sequence.
161. NZ_BBMR01000002_5	Vibrio maritimus strain JCM 19235, whole genome shotgun sequence.
162. NZ_CP009355_0	Vibrio tubiashii ATCC 19109 chromosome 2, complete sequence.
163. NZ_JYJP01000027_0	Vibrio mexicanus strain CAIM 1540 contig00036, whole genome shotgun sequence.
164. NZ_BBMR01000002_0	Vibrio maritimus strain JCM 19235, whole genome shotgun sequence.
165. NC_004603_0	Vibrio parahaemolyticus RIMD 2210633 chromosome 1, complete sequence.
166. NC_009783_1	Vibrio campbellii ATCC BAA-1116 chromosome I, complete sequence.
167. CP018680_5	Vibrio harveyi isolate QT520 chromosome 1, complete sequence.
168. NZ_CP014038_3	Vibrio harveyi strain FDAARGOS_107 chromosome 1, complete sequence.
169. NC_022349_5	Vibrio alginolyticus NBRC 15630 = ATCC 17749 chromosome 1, complete sequence.
170. NZ_JXCJ01000001_1	Gilvimarinus agarilyticus strain JEA5 scaffold1, whole genome shotgun sequence.
171. CP026604_5	Catenovulum sp. CCB-QB4 chromosome, complete genome.
172. NZ_CP014637_0	Vibrio vulnificus strain CECT 4999 chromosome II, complete sequence.
173. NZ_MUZU01000001_1	Colwellia agarivorans strain QM50 contig1, whole genome shotgun sequence.
174. NZ_LHPI01000001_3	Vibrio hepatarius strain DSM 19134 contig0001, whole genome shotgun sequence.
175. NZ_CP009354_1	Vibrio tubiashii ATCC 19109 chromosome 1, complete sequence.
176. NZ_AEVS01000019_0	Vibrio brasiliensis LMG 20546 VIBR0546_121, whole genome shotgun sequence.
177. NZ_JRWM01000016_0	Vibrio variabilis strain T01 Contig16, whole genome shotgun sequence.
178. AFWH01000002_0	Vibrio orientalis CIP 102891 = ATCC 33934 strain CIP 102891 VIOR3934_10, whole genome shotgun sequence.
179. CP014032_7	Vibrio fluvialis strain FDAARGOS_100 chromosome 2, complete sequence.
180. NZ_FLQZ01000004_1	Vibrio celticus strain CECT 7224, whole genome shotgun sequence.
181. CP014034_4	Vibrio fluvialis strain ATCC 33809 chromosome 1, complete sequence.
182. NZ_LNQX01000001_5	Vibrio splendidus strain NCCB 53037 NODE_1, whole genome shotgun sequence.
183. NC_004605_6	Vibrio parahaemolyticus RIMD 2210633 chromosome 2, complete sequence.
184. NZ_CP014637_4	Vibrio vulnificus strain CECT 4999 chromosome II, complete sequence.
185. CP018681_11	Vibrio harveyi isolate QT520 chromosome 2, complete sequence.
186. NZ_CP014039_7	Vibrio harveyi strain FDAARGOS_107 chromosome 2, complete sequence.
187. NC_009784_0	Vibrio campbellii ATCC BAA-1116 chromosome II, complete sequence.
188. NZ_AEIU01000002_0	Vibrio caribbeanicus ATCC BAA-2122 VIBC2010_10, whole genome shotgun sequence.
189. NZ_BBMR01000003_0	Vibrio maritimus strain JCM 19235, whole genome shotgun sequence.
190. NZ_AEVT01000023_0	Vibrio sinaloensis DSM 21326 VISI1226_129, whole genome shotgun sequence.
191. CP003241_8	Vibrio sp. EJY3 chromosome 1, complete sequence.
192. NZ_AUBY01000010_0	Aliagarivorans marinus DSM 23064 G461DRAFT_scaffold00006.6_C, whole genome shotgun sequence.
193. BBMQ01000019_0	Vibrio sp. C7 DNA, contig: contig00024, strain: JCM 19233, whole genome shotgun sequence.
194. CP005973_8	Photobacterium gaetbulicola Gung47 chromosome 1, complete sequence.
195. NZ_CP009617_0	Vibrio coralliilyticus strain RE98 chromosome 1, complete sequence.
196. CP026604_3	Catenovulum sp. CCB-QB4 chromosome, complete genome.
197. NZ_BBMR01000006_1	Vibrio maritimus strain JCM 19235, whole genome shotgun sequence.
198. NZ_CP020472_7	Shewanella japonica strain KCTC 22435 chromosome, complete genome.
199. FNVG01000003_0	Vibrio hangzhouensis strain CGMCC 1.7062 genome assembly, contig: Ga0070180_103, whole genome shotgun sequence.
200. NZ_BATJ01000005_1	Vibrio proteolyticus NBRC 13287, whole genome shotgun sequence.
201. CP005973_1	Photobacterium gaetbulicola Gung47 chromosome 1, complete sequence.
202. CP005973_2	Photobacterium gaetbulicola Gung47 chromosome 1, complete sequence.
203. NZ_AMRX01000008_1	Gayadomonas joobiniege G7 plasmid pG7, whole genome shotgun sequence.
204. NZ_JXCJ01000001_0	Gilvimarinus agarilyticus strain JEA5 scaffold1, whole genome shotgun sequence.
205. NZ_CP014038_7	Vibrio harveyi strain FDAARGOS_107 chromosome 1, complete sequence.
206. CP018680_1	Vibrio harveyi isolate QT520 chromosome 1, complete sequence.
207. NZ_MUZU01000002_0	Colwellia agarivorans strain QM50 contig2, whole genome shotgun sequence.
208. NC_009783_5	Vibrio campbellii ATCC BAA-1116 chromosome I, complete sequence.
209. CP018680_0	Vibrio harveyi isolate QT520 chromosome 1, complete sequence.
210. NZ_CP014038_6	Vibrio harveyi strain FDAARGOS_107 chromosome 1, complete sequence.
211. Vas2_5	No definition line found.
212. NZ_JH767523_0	Catenovulum agarivorans YM01 Scaffold2, whole genome shotgun sequence.
213. CP018681_8	Vibrio harveyi isolate QT520 chromosome 2, complete sequence.
214. NZ_CP014039_9	Vibrio harveyi strain FDAARGOS_107 chromosome 2, complete sequence.
215. NZ_AUBY01000016_0	Aliagarivorans marinus DSM 23064 G461DRAFT_scaffold00011.11_C, whole genome shotgun sequence.
216. CP005974_4	Photobacterium gaetbulicola Gung47 chromosome 2, complete sequence.
217. NZ_CP014038_8	Vibrio harveyi strain FDAARGOS_107 chromosome 1, complete sequence.
218. NC_015844_11	Zobellia galactanivorans strain DsiJT chromosome, complete genome.
219. CP018680_2	Vibrio harveyi isolate QT520 chromosome 1, complete sequence.
220. NZ_LNQX01000006_1	Vibrio splendidus strain NCCB 53037 NODE_6, whole genome shotgun sequence.
221. CP005974_2	Photobacterium gaetbulicola Gung47 chromosome 2, complete sequence.
222. NZ_BBMR01000003_2	Vibrio maritimus strain JCM 19235, whole genome shotgun sequence.
223. NZ_CP014038_0	Vibrio harveyi strain FDAARGOS_107 chromosome 1, complete sequence.
224. BBSC01000001_2	Vibrio ishigakensis DNA, contig00001, strain: JCM19241, whole genome shotgun sequence.
225. NZ_CP013021_7	Agarivorans gilvus strain WH0801, complete genome.
226. BBSC01000003_3	Vibrio ishigakensis DNA, contig00003, strain: JCM19241, whole genome shotgun sequence.
227. NC_022359_7	Vibrio alginolyticus NBRC 15630 = ATCC 17749 chromosome 2, complete sequence.
228. NC_022349_0	Vibrio alginolyticus NBRC 15630 = ATCC 17749 chromosome 1, complete sequence.
229. NZ_LNQX01000001_1	Vibrio splendidus strain NCCB 53037 NODE_1, whole genome shotgun sequence.
230. NZ_CP014039_8	Vibrio harveyi strain FDAARGOS_107 chromosome 2, complete sequence.
231. CP033577_4	Vibrio mediterranei strain 117-T6 chromosome 1, complete sequence.
232. NZ_LHPI01000003_1	Vibrio hepatarius strain DSM 19134 contig0003, whole genome shotgun sequence.
233. CP018681_9	Vibrio harveyi isolate QT520 chromosome 2, complete sequence.
234. CP003242_2	Vibrio sp. EJY3 chromosome 2, complete sequence.
235. CP014033_7	Vibrio fluvialis strain FDAARGOS_100 chromosome 1, complete sequence.
236. CP014035_1	Vibrio fluvialis strain ATCC 33809 chromosome 2, complete sequence.
237. NZ_AEIU01000112_0	Vibrio caribbeanicus ATCC BAA-2122 VIBC2010_81, whole genome shotgun sequence.
238. NZ_LHPI01000001_1	Vibrio hepatarius strain DSM 19134 contig0001, whole genome shotgun sequence.
239. NZ_JYJP01000016_0	Vibrio mexicanus strain CAIM 1540 contig00025, whole genome shotgun sequence.
240. FNVG01000006_1	Vibrio hangzhouensis strain CGMCC 1.7062 genome assembly, contig: Ga0070180_106, whole genome shotgun sequence.
241. FNVG01000004_3	Vibrio hangzhouensis strain CGMCC 1.7062 genome assembly, contig: Ga0070180_104, whole genome shotgun sequence.
242. BBMQ01000185_0	Vibrio sp. C7 DNA, contig: contig00020, strain: JCM 19233, whole genome shotgun sequence.
243. BBMQ01000322_0	Vibrio sp. C7 DNA, contig: contig00057, strain: JCM 19233, whole genome shotgun sequence.
244. NZ_AEVT01000060_0	Vibrio sinaloensis DSM 21326 VISI1226_24, whole genome shotgun sequence.
245. NC_004605_4	Vibrio parahaemolyticus RIMD 2210633 chromosome 2, complete sequence.
246. CP003242_6	Vibrio sp. EJY3 chromosome 2, complete sequence.
247. NZ_BBMR01000006_0	Vibrio maritimus strain JCM 19235, whole genome shotgun sequence.
248. NZ_LNQX01000005_1	Vibrio splendidus strain NCCB 53037 NODE_5, whole genome shotgun sequence.
249. Vas2_6	No definition line found.
250. CP014035_4	Vibrio fluvialis strain ATCC 33809 chromosome 2, complete sequence.
Details:
>>
1. Vas2_4
Source: No definition line found.
Number of proteins with BLAST hits to this cluster: 31
MultiGeneBlast score: 31.0
Cumulative Blast bit score: 22803
Table of genes, locations, strands and annotations of subject cluster:
Vas2_910	1027312	1029033	-	protein	no_locus_tag
Vas2_911	1029067	1030041	-	protein	no_locus_tag
Vas2_912	1030046	1031182	-	protein	no_locus_tag
Vas2_913	1031504	1032484	+	protein	no_locus_tag
Vas2_914	1032803	1033564	+	protein	no_locus_tag
Vas2_915	1033643	1035640	-	protein	no_locus_tag
Vas2_916	1035799	1036734	-	protein	no_locus_tag
Vas2_917	1036862	1037779	+	protein	no_locus_tag
Vas2_918	1037832	1038791	+	protein	no_locus_tag
Vas2_919	1038919	1039743	+	protein	no_locus_tag
Vas2_920	1039748	1040509	+	protein	no_locus_tag
Vas2_921	1040588	1041346	-	protein	no_locus_tag
Vas2_922	1041835	1042752	-	protein	no_locus_tag
Vas2_923	1042887	1043561	-	protein	no_locus_tag
Vas2_924	1043819	1045024	+	protein	no_locus_tag
Vas2_925	1045421	1047004	+	protein	no_locus_tag
Vas2_926	1047056	1048588	+	protein	no_locus_tag
Vas2_927	1048861	1049772	+	protein	no_locus_tag
Vas2_928	1050076	1051953	+	protein	no_locus_tag
Vas2_929	1052442	1054325	-	protein	no_locus_tag
Vas2_930	1054963	1055331	+	protein	no_locus_tag
Vas2_931	1055328	1055597	+	protein	no_locus_tag
Vas2_932	1055651	1056463	-	protein	no_locus_tag
Vas2_933	1056609	1057229	+	protein	no_locus_tag
Vas2_934	1057289	1058512	+	protein	no_locus_tag
Vas2_935	1058702	1059427	+	protein	no_locus_tag
Vas2_936	1059499	1060071	-	protein	no_locus_tag
Vas2_937	1060170	1060712	+	protein	no_locus_tag
Vas2_938	1060783	1061385	-	protein	no_locus_tag
Vas2_939	1061396	1062346	-	protein	no_locus_tag
Vas2_940	1062366	1063511	-	protein	no_locus_tag
Table of Blast hits (query gene, subject gene, %identity, blast score, %coverage, e-value):
Vas2_910_1027312-102	Vas2_910	100	1144	100	0
Vas2_911_1029067-103	Vas2_911	100	659	100	0
Vas2_912_1030046-103	Vas2_912	100	766	100	0
Vas2_913_1031504-103	Vas2_913	100	671	100	0
Vas2_914_1032803-103	Vas2_914	100	512	100	4e-145
Vas2_915_1033643-103	Vas2_915	99	1364	100	0
Vas2_916_1035799-103	Vas2_916	100	640	100	0
Vas2_917_1036862-103	Vas2_917	100	632	100	0
Vas2_918_1037832-103	Vas2_918	100	626	100	2e-179
Vas2_919_1038919-103	Vas2_919	100	530	99.635	1e-150
Vas2_920_1039748-104	Vas2_920	100	522	100	4e-148
Vas2_921_1040588-104	Vas2_921	100	511	100	7e-145
Vas2_922_1041835-104	Vas2_922	100	639	100	0
Vas2_922_1041835-104	Vas2_927	66	430	98.6885	3e-120
Vas2_922_1041835-104	Vas2_928	40	196	104.59	9e-50
Vas2_923_1042887-104	Vas2_923	100	453	100	1e-127
Vas2_924_1043819-104	Vas2_924	100	823	100	0
Vas2_925_1045421-104	Vas2_925	100	1062	100	0
Vas2_926_1047056-104	Vas2_926	100	1071	100	0
Vas2_927_1048861-104	Vas2_927	100	632	100	0
Vas2_927_1048861-104	Vas2_922	66	430	99.3399	3e-120
Vas2_927_1048861-104	Vas2_928	37	189	103.63	1e-47
Vas2_928_1050076-105	Vas2_928	100	1278	100	0
Vas2_928_1050076-105	Vas2_922	40	195	51.04	2e-49
Vas2_928_1050076-105	Vas2_927	37	189	50.24	3e-47
Vas2_929_1052442-105	Vas2_929	100	1312	100	0
Vas2_930_1054963-105	Vas2_930	99	246	100	8e-66
Vas2_931_1055328-105	Vas2_931	100	177	100	5e-45
Vas2_932_1055651-105	Vas2_932	100	523	100	2e-148
Vas2_933_1056609-105	Vas2_933	100	426	100	3e-119
Vas2_934_1057289-105	Vas2_934	100	862	100	0
Vas2_935_1058702-105	Vas2_935	100	494	100	8e-140
Vas2_936_1059499-106	Vas2_936	100	398	100	5e-111
Vas2_937_1060170-106	Vas2_937	100	362	100	2e-100
Vas2_938_1060783-106	Vas2_938	99	402	100	2e-112
Vas2_939_1061396-106	Vas2_939	100	654	100	0
Vas2_940_1062366-106	Vas2_940	100	783	100	0
>>
2. BBMQ01000292_0
Source: Vibrio sp. C7 DNA, contig: contig00008, strain: JCM 19233, whole genome shotgun sequence.
Number of proteins with BLAST hits to this cluster: 24
MultiGeneBlast score: 24.0
Cumulative Blast bit score: 16028
Table of genes, locations, strands and annotations of subject cluster:
GAL15474	63	350	+	ferrichrome-iron_receptor	JCM19233_6496
GAL15475	405	836	-	hypothetical_protein	JCM19233_6497
GAL15476	921	1436	-	TonB-dependent_receptor	JCM19233_6498
GAL15477	1439	2704	-	colicin_I_receptor_precursor	JCM19233_6499
GAL15478	3052	3990	-	transcriptional_regulator_LysR_family	JCM19233_6500
GAL15479	4169	5086	+	iron_compound_ABC_uptake_transporter substrate-binding protein	JCM19233_6501
GAL15480	5109	5558	+	iron_compound_ABC_transporter_permease_protein	JCM19233_6502
GAL15481	5525	6097	+	catechol_siderophore_ABC_transporter_permease component	JCM19233_6503
GAL15482	6090	6380	+	iron_compound_ABC_uptake_transporter_permease protein	JCM19233_6504
GAL15483	6377	6733	+	iron_compound_ABC_uptake_transporter_permease protein PiuC	JCM19233_6505
GAL15484	6726	7037	+	uncharacterized_iron_compound_ABC_uptake transporter permease protein	JCM19233_6506
GAL15485	7049	7495	+	catechol_siderophore_ABC_transporter_ATP-binding component	JCM19233_6507
GAL15486	7489	7809	+	catechol_siderophore_ABC_transporter_ATP-binding component	JCM19233_6508
GAL15487	7888	8397	-	phosphatidylglycerophosphatase_B	JCM19233_6509
GAL15488	9132	9920	-	sugar_glucoside_polyol_and_carboxylate catabolism	JCM19233_6510
GAL15489	10199	10558	-	hypothetical_protein	JCM19233_6511
GAL15490	10605	10805	-	hypothetical_protein	JCM19233_6512
GAL15491	11115	11369	+	hypothetical_outer_membrane_protein	JCM19233_6513
GAL15492	11396	12232	+	maltoporin	JCM19233_6514
GAL15493	12715	14298	+	D-xylose_proton-symporter_XylE	JCM19233_6515
GAL15494	14350	14523	+	hypothetical_protein	JCM19233_6516
GAL15495	14523	15884	+	putative_sulfatase	JCM19233_6517
GAL15496	16196	17062	+	sugar_glucoside_polyol_and_carboxylate catabolism	JCM19233_6518
GAL15497	17363	17530	+	hypothetical_protein	JCM19233_6519
GAL15498	17811	19238	+	phage_major_tail_protein	JCM19233_6520
GAL15499	19742	19858	-	hypothetical_protein	JCM19233_6521
GAL15500	19843	21624	-	secreted_protein	JCM19233_6522
GAL15501	22130	22942	-	hypothetical_protein	JCM19233_6523
GAL15502	23329	23706	+	cAMP-binding_proteins_-_catabolite_gene	JCM19233_6524
GAL15503	23766	24092	+	putative_arylsulfatase_regulatory_protein	JCM19233_6525
GAL15504	24082	24195	-	hypothetical_protein	JCM19233_6526
GAL15505	24217	24399	+	putative_arylsulfatase_regulatory_protein	JCM19233_6527
GAL15506	24390	24989	+	putative_arylsulfatase_regulatory_protein	JCM19233_6528
GAL15507	25180	25905	+	transcriptional_regulator_IclR_family	JCM19233_6529
GAL15508	25977	26549	-	transcriptional_regulator_TetR_family	JCM19233_6530
GAL15509	26648	26923	+	dihydrofolate_reductase_homolog	JCM19233_6531
GAL15510	26995	27180	+	dihydrofolate_reductase_homolog	JCM19233_6532
GAL15511	27260	27862	-	2-dehydro-3-deoxyphosphogalactonate_aldolase	JCM19233_6533
GAL15512	27953	28822	-	2-dehydro-3-deoxygalactonokinase	JCM19233_6534
GAL15513	28842	29780	-	mandelate_racemase/muconate_lactonizing_enzyme family protein	JCM19233_6535
GAL15514	29774	29986	-	hypothetical_protein	JCM19233_6536
GAL15515	30410	31816	+	aldehyde_dehydrogenase	JCM19233_6537
GAL15516	31951	32175	+	hypothetical_protein	JCM19233_6538
GAL15517	32271	32504	-	hypothetical_protein	JCM19233_6539
GAL15518	32870	33019	+	hypothetical_protein	JCM19233_6540
GAL15519	33029	34240	+	probable_MFS_transporter	JCM19233_6541
GAL15520	34598	34864	+	integral_membrane_protein_TerC	JCM19233_6542
GAL15521	34993	35583	+	integral_membrane_protein_TerC	JCM19233_6543
GAL15522	35630	35917	-	6-phospho-beta-glucosidase	JCM19233_6544
GAL15523	35944	36783	-	6-phospho-beta-glucosidase	JCM19233_6545
GAL15524	36732	37019	-	beta-glucosidase_protein	JCM19233_6546
GAL15525	37149	37682	+	cytochrome_B561	JCM19233_6547
GAL15526	37789	37959	-	hypothetical_protein	JCM19233_6548
GAL15527	38147	38536	-	hypothetical_protein	JCM19233_6549
GAL15528	38533	39105	-	hypothetical_protein	JCM19233_6550
GAL15529	39142	39324	-	hypothetical_protein	JCM19233_6551
GAL15530	39555	39893	-	polymyxin_resistance_protein_ArnC_glycosyl transferase	JCM19233_6552
GAL15531	39905	40453	-	polymyxin_resistance_protein_ArnC_glycosyl transferase	JCM19233_6553
GAL15532	40683	41195	-	hypothetical_protein	JCM19233_6554
GAL15533	41205	41390	-	hypothetical_protein	JCM19233_6555
GAL15534	41659	42333	+	putaive_two-component_response_regulator	JCM19233_6556
GAL15535	42426	43610	+	two-component_system_sensor_protein	JCM19233_6557
GAL15536	43607	43894	-	hypothetical_protein	JCM19233_6558
GAL15537	43897	44082	-	hypothetical_protein	JCM19233_6559
GAL15538	44138	44977	-	hypothetical_protein	JCM19233_6560
GAL15539	44969	45187	+	uncharacterized_conserved_protein	JCM19233_6561
GAL15540	45269	46021	+	uncharacterized_conserved_protein	JCM19233_6562
GAL15541	46039	46326	-	predicted_esterase_of_the_alpha-beta_hydrolase superfamily	JCM19233_6563
GAL15542	46418	46888	-	serine_protease	JCM19233_6564
GAL15543	46960	47136	-	predicted_esterase_of_the_alpha-beta_hydrolase superfamily	JCM19233_6565
GAL15544	47645	47905	+	oxalate/formate_antiporter	JCM19233_6566
GAL15545	47902	48330	+	oxalate/formate_antiporter	JCM19233_6567
GAL15546	48330	48890	+	oxalate/formate_antiporter	JCM19233_6568
GAL15547	48947	50551	+	hypothetical_protein_restriction endonuclease-like VRR-NUC domain	JCM19233_6569
Table of Blast hits (query gene, subject gene, %identity, blast score, %coverage, e-value):
Vas2_915_1033643-103	GAL15477	75	667	61.9549	0
Vas2_915_1033643-103	GAL15476	71	265	26.6165	3e-70
Vas2_916_1035799-103	GAL15478	66	456	99.3569	4e-128
Vas2_917_1036862-103	GAL15479	78	516	100	4e-146
Vas2_918_1037832-103	GAL15481	97	372	59.5611	1e-102
Vas2_918_1037832-103	GAL15480	83	197	36.0502	4e-50
Vas2_919_1038919-103	GAL15483	99	234	43.0657	1e-61
Vas2_919_1038919-103	GAL15484	100	193	36.4964	4e-49
Vas2_919_1038919-103	GAL15482	100	93	17.8832	5e-19
Vas2_920_1039748-104	GAL15485	98	286	55.336	5e-77
Vas2_920_1039748-104	GAL15486	100	218	41.8972	9e-57
Vas2_921_1040588-104	GAL15487	97	343	67.0635	2e-94
Vas2_922_1041835-104	GAL15488	99	550	85.9016	2e-156
Vas2_922_1041835-104	GAL15496	68	428	93.7705	1e-119
Vas2_922_1041835-104	GAL15498	43	108	49.5082	1e-23
Vas2_923_1042887-104	GAL15489	93	222	52.2321	5e-58
Vas2_923_1042887-104	GAL15490	84	116	29.0179	6e-26
Vas2_924_1043819-104	GAL15492	98	550	66.8329	3e-156
Vas2_924_1043819-104	GAL15491	97	145	20.4489	2e-34
Vas2_925_1045421-104	GAL15493	99	1056	100	0
Vas2_926_1047056-104	GAL15495	99	879	82.3529	0
Vas2_926_1047056-104	GAL15494	100	92	8.03922	2e-18
Vas2_927_1048861-104	GAL15496	99	600	95.0495	1e-171
Vas2_927_1048861-104	GAL15488	70	399	85.1485	5e-111
Vas2_927_1048861-104	GAL15498	40	105	49.505	2e-22
Vas2_928_1050076-105	GAL15498	99	959	76	0
Vas2_928_1050076-105	GAL15488	42	186	44.48	1e-46
Vas2_928_1050076-105	GAL15496	37	184	49.92	8e-46
Vas2_928_1050076-105	GAL15497	98	104	8.16	8e-22
Vas2_929_1052442-105	GAL15500	96	1192	94.2584	0
Vas2_932_1055651-105	GAL15501	91	431	100	1e-120
Vas2_933_1056609-105	GAL15502	100	261	60.6796	6e-70
Vas2_934_1057289-105	GAL15506	98	416	48.6486	5e-116
Vas2_934_1057289-105	GAL15503	95	207	24.3243	5e-53
Vas2_934_1057289-105	GAL15505	100	120	14.2506	7e-27
Vas2_935_1058702-105	GAL15507	99	490	100	1e-138
Vas2_936_1059499-106	GAL15508	94	373	100	2e-103
Vas2_937_1060170-106	GAL15509	92	175	50.5556	5e-44
Vas2_937_1060170-106	GAL15510	96	119	33.8889	4e-27
Vas2_938_1060783-106	GAL15511	98	396	100	2e-110
Vas2_939_1061396-106	GAL15512	97	587	91.4557	1e-167
Vas2_940_1062366-106	GAL15513	99	639	81.8898	0
Vas2_940_1062366-106	GAL15514	93	99	12.5984	1e-20
>>
3. NZ_KE386909_1
Source: Aliagarivorans marinus DSM 23064 G461DRAFT_scaffold00003.3, whole genome shotgun sequence.
Number of proteins with BLAST hits to this cluster: 10
MultiGeneBlast score: 10.0
Cumulative Blast bit score: 4835
Table of genes, locations, strands and annotations of subject cluster:
WP_035480995	396284	397663	+	membrane_protein	G461_RS0121435
WP_026973387	397762	398766	+	glycosyltransferase	G461_RS25730
WP_051333753	398766	399716	+	glycosyltransferase_family_2_protein	G461_RS25735
WP_026973388	399713	401200	+	hypothetical_protein	G461_RS0121450
WP_026973389	401304	402023	+	acyltransferase	G461_RS0121455
WP_026973390	402027	403196	+	glycosyltransferase	G461_RS0121460
WP_026973391	403203	404027	-	Cof-type_HAD-IIB_family_hydrolase	G461_RS0121465
WP_026973392	404410	405900	+	sodium-dependent_transporter	G461_RS0121470
WP_157360391	405902	406000	+	MetS_family_NSS_transporter_small_subunit	G461_RS26190
WP_026973393	406049	406939	-	LysR_family_transcriptional_regulator	G461_RS0121480
WP_026973394	407080	407685	+	short_chain_dehydrogenase	G461_RS0121485
WP_026973395	407961	408929	-	hypothetical_protein	G461_RS0121490
WP_026973396	409024	410697	-	VRR-NUC_domain-containing_protein	G461_RS0121495
WP_026973397	411160	412464	+	anaerobic_C4-dicarboxylate_transporter	G461_RS0121500
WP_035480997	412647	413162	+	hypothetical_protein	G461_RS0121505
WP_026973399	413306	414070	+	exodeoxyribonuclease_III	xth
WP_084429450	414126	415394	-	MFS_transporter	G461_RS0121515
WP_035480999	416237	416560	-	DUF202_domain-containing_protein	G461_RS25150
WP_026973401	416557	416919	-	DUF202_domain-containing_protein	G461_RS0121535
WP_026973402	417036	417851	-	sulfite_exporter_TauE/SafE_family_protein	G461_RS0121540
WP_084429452	418018	418641	+	Crp/Fnr_family_transcriptional_regulator	G461_RS25995
WP_026973403	418662	419990	+	anaerobic_sulfatase_maturase	G461_RS0121550
WP_026973404	420379	421800	+	aldehyde_dehydrogenase_family_protein	G461_RS0121555
WP_026973405	422056	423933	+	hypothetical_protein	G461_RS0121560
WP_051333755	424041	425390	+	family_16_glycosylhydrolase	G461_RS25745
WP_084429454	425983	426897	-	family_16_glycosylhydrolase	G461_RS25165
WP_084429456	427034	427738	-	hypothetical_protein	G461_RS0121575
WP_084429458	428031	429254	+	hypothetical_protein	G461_RS25170
WP_051333758	429404	430324	-	DMT_family_transporter	G461_RS0121585
WP_026973409	431536	431826	+	hypothetical_protein	G461_RS0121595
WP_026973411	432353	432700	+	hypothetical_protein	G461_RS0121605
WP_026973412	432832	433272	+	hypothetical_protein	G461_RS0121610
WP_026973413	434070	434540	+	hypothetical_protein	G461_RS0121615
WP_026973414	435090	435560	+	hypothetical_protein	G461_RS0121620
WP_157360392	435572	435865	+	hypothetical_protein	G461_RS26195
G461_RS0121625	436241	436498	+	IS5/IS1182_family_transposase	no_locus_tag
Table of Blast hits (query gene, subject gene, %identity, blast score, %coverage, e-value):
Vas2_922_1041835-104	WP_084429454	76	489	99.0164	4e-138
Vas2_922_1041835-104	WP_051333755	40	204	106.23	3e-52
Vas2_924_1043819-104	WP_084429458	64	532	100.998	6e-151
Vas2_927_1048861-104	WP_084429454	66	443	100.33	3e-124
Vas2_927_1048861-104	WP_051333755	36	183	99.0099	6e-46
Vas2_928_1050076-105	WP_051333755	64	605	71.68	1e-172
Vas2_928_1050076-105	WP_084429454	41	201	49.28	4e-51
Vas2_929_1052442-105	WP_026973405	66	901	99.8405	0
Vas2_930_1054963-105	WP_026973401	57	139	95.082	2e-33
Vas2_931_1055328-105	WP_035480999	31	49	112.36	2e-06
Vas2_932_1055651-105	WP_026973402	58	275	97.4074	8e-74
Vas2_933_1056609-105	WP_084429452	62	263	90.7767	3e-70
Vas2_934_1057289-105	WP_026973403	64	551	96.8059	1e-156
>>
4. NZ_AUBY01000022_0
Source: Aliagarivorans marinus DSM 23064 G461DRAFT_scaffold00017.17_C, whole genome shotgun sequence.
Number of proteins with BLAST hits to this cluster: 9
MultiGeneBlast score: 9.0
Cumulative Blast bit score: 4433
Table of genes, locations, strands and annotations of subject cluster:
G461_RS0110400	2	298	+	IS5/IS1182_family_transposase	no_locus_tag
WP_035480024	1547	2461	-	family_16_glycosylhydrolase	G461_RS0110410
WP_026971793	2798	4324	-	sulfatase-like_hydrolase/transferase	G461_RS0110415
WP_051333494	4359	5966	-	MFS_transporter	G461_RS23905
WP_026971794	6399	7826	-	aldehyde_dehydrogenase_family_protein	G461_RS0110425
WP_051333495	8150	8875	+	IclR_family_transcriptional_regulator	G461_RS23910
WP_026971795	8940	9995	+	TRAP_transporter_substrate-binding_protein	G461_RS0110435
WP_026971796	10031	10516	+	TRAP_transporter_small_permease	G461_RS0110440
WP_026971797	10516	11784	+	TRAP_transporter_large_permease	G461_RS0110445
WP_026971798	11803	12948	+	mandelate_racemase/muconate_lactonizing_enzyme family protein	G461_RS0110450
WP_026971799	13012	13914	+	2-dehydro-3-deoxygalactonokinase	G461_RS0110455
WP_026971800	13904	14542	+	2-dehydro-3-deoxy-6-phosphogalactonate_aldolase	G461_RS0110460
WP_157360283	15369	15563	+	hypothetical_protein	G461_RS26075
WP_026971801	15990	16169	+	hypothetical_protein	G461_RS0110470
WP_026971802	16229	16996	-	HAD-IIB_family_hydrolase	G461_RS0110475
WP_026971803	17014	17814	-	hypothetical_protein	G461_RS25510
WP_084429145	17814	18677	-	carbohydrate_ABC_transporter_permease	G461_RS0110485
WP_026971805	18674	19543	-	sugar_ABC_transporter_permease	G461_RS0110490
WP_026971806	19640	20929	-	ABC_transporter_substrate-binding_protein	G461_RS0110495
WP_026971807	20956	21981	-	ABC_transporter_ATP-binding_protein	G461_RS0110500
WP_051333496	21978	22745	-	DeoR/GlpR_transcriptional_regulator	G461_RS23925
WP_026971808	22982	24001	+	hypothetical_protein	G461_RS0110510
WP_026971809	24042	24791	+	TSUP_family_transporter	G461_RS0110515
WP_026971810	24810	25133	+	hypothetical_protein	G461_RS0110520
WP_026971811	25369	26097	+	transporter_substrate-binding_domain-containing protein	G461_RS0110525
WP_157360287	26173	27012	+	alpha/beta_fold_hydrolase	G461_RS0110530
WP_051333497	27147	27875	+	transporter_substrate-binding_domain-containing protein	G461_RS23930
WP_026971813	28129	28731	+	hypothetical_protein	G461_RS0110540
WP_026971814	28741	29640	-	LysR_family_transcriptional_regulator	G461_RS0110545
WP_026971815	29735	30745	+	zinc-binding_dehydrogenase	G461_RS0110550
WP_026971816	30873	31628	-	SDR_family_oxidoreductase	G461_RS0110555
WP_035480030	31836	32720	+	LysR_family_transcriptional_regulator	G461_RS23935
WP_026971817	32727	34502	-	hypothetical_protein	G461_RS0110565
Table of Blast hits (query gene, subject gene, %identity, blast score, %coverage, e-value):
Vas2_922_1041835-104	WP_035480024	68	450	98.6885	2e-126
Vas2_925_1045421-104	WP_051333494	78	830	97.5332	0
Vas2_926_1047056-104	WP_026971793	82	907	100	0
Vas2_927_1048861-104	WP_035480024	82	538	100.33	5e-153
Vas2_928_1050076-105	WP_035480024	40	204	51.04	8e-52
Vas2_935_1058702-105	WP_051333495	68	353	100	2e-97
Vas2_938_1060783-106	WP_026971800	61	238	99.5	8e-63
Vas2_939_1061396-106	WP_026971799	50	306	93.9873	5e-83
Vas2_940_1062366-106	WP_026971798	76	607	100	2e-173
>>
5. BBSC01000003_1
Source: Vibrio ishigakensis DNA, contig00003, strain: JCM19241, whole genome shotgun sequence.
Number of proteins with BLAST hits to this cluster: 7
MultiGeneBlast score: 7.0
Cumulative Blast bit score: 3231
Table of genes, locations, strands and annotations of subject cluster:
GAM74908	329102	330112	-	ornithine_carbamoyltransferase	JCM19241_1251
GAM74909	330238	331152	-	carbamate_kinase	JCM19241_1252
GAM74910	331204	332424	-	arginine_deiminase	JCM19241_1253
GAM74911	333540	333725	-	arginine/ornithine_antiporter_arcD	JCM19241_1254
GAM74912	333755	334528	-	arginine/ornithine_antiporter_arcD	JCM19241_1255
GAM74913	334492	334764	-	arginine/ornithine_antiporter_arcD	JCM19241_1256
GAM74914	334757	334984	-	arginine/ornithine_antiporter_arcD	JCM19241_1257
GAM74915	335826	336224	+	ATP_synthase_protein_I2	JCM19241_1258
GAM74916	336227	336997	+	ATP_synthase_F0_sector_subunit_a	JCM19241_1259
GAM74917	337049	337285	+	ATP_synthase_F0_sector_subunit_c	JCM19241_1260
GAM74918	337335	337718	+	ATP_synthase_F0_sector_subunit_b	JCM19241_1261
GAM74919	337817	338035	+	ATP_synthase_delta_chain	JCM19241_1262
GAM74920	338032	338367	+	ATP_synthase_delta_chain	JCM19241_1263
GAM74921	338377	338754	+	ATP_synthase_alpha_chain	JCM19241_1264
GAM74922	338841	338993	+	ATP_synthase_alpha_chain	JCM19241_1265
GAM74923	338950	339915	+	ATP_synthase_alpha_chain	JCM19241_1266
GAM74924	339963	340823	+	ATP_synthase_gamma_chain	JCM19241_1267
GAM74925	340854	341615	+	ATP_synthase_beta_chain	JCM19241_1268
GAM74926	341638	342237	+	ATP_synthase_beta_chain	JCM19241_1269
GAM74927	342252	342698	+	ATP_synthase_epsilon_chain	JCM19241_1270
GAM74928	343152	343556	+	hypothetical_protein	JCM19241_1271
GAM74929	343698	344153	-	hypothetical_protein	JCM19241_1272
GAM74930	344164	344631	-	hypothetical_protein	JCM19241_1273
GAM74931	344640	344807	-	hypothetical_protein	JCM19241_1274
GAM74932	344798	344953	-	hypothetical_protein	JCM19241_1275
GAM74933	345195	346085	-	hypothetical_protein	JCM19241_1276
GAM74934	346158	346646	-	hypothetical_protein	JCM19241_1277
GAM74935	346652	347023	-	hypothetical_protein	JCM19241_1278
GAM74936	347246	347476	-	hypothetical_protein	JCM19241_1279
GAM74937	348571	349602	-	GALNS_arylsulfatase_regulator	JCM19241_1280
GAM74938	349658	350842	-	choline-sulfatase	JCM19241_1281
GAM74939	350920	351036	-	hypothetical_protein	JCM19241_1282
GAM74940	351253	352287	-	hypothetical_protein	JCM19241_1283
GAM74941	352522	353643	-	maltose/maltodextrin_transport_ATP-binding protein malK	JCM19241_1284
GAM74942	353665	354309	-	UDP-3-O-(3-hydroxymyristoyl)_glucosamine N-acyltransferase	JCM19241_1285
GAM74943	354306	354527	-	UDP-3-O-(3-hydroxymyristoyl)_glucosamine N-acyltransferase	JCM19241_1286
GAM74944	354509	354682	-	hypothetical_protein	JCM19241_1287
GAM74945	354698	354928	-	hypothetical_protein	JCM19241_1288
GAM74946	354925	355716	-	cymA_protein_precursor	JCM19241_1289
GAM74947	356125	356808	+	maltose/maltodextrin_ABC_transporter	JCM19241_1290
GAM74948	356796	357350	+	maltose/maltodextrin_ABC_transporter	JCM19241_1291
GAM74949	357603	358652	+	maltose/maltodextrin_ABC_transporter	JCM19241_1292
GAM74950	358655	359494	+	maltose/maltodextrin_ABC_transporter	JCM19241_1293
GAM74951	359564	361339	+	neopullulanase	JCM19241_1294
GAM74952	361513	362340	+	cymJ_protein	JCM19241_1295
GAM74953	362349	363170	+	putative_alpha-dextrin_endo-1	JCM19241_1296
GAM74954	363364	363531	+	hypothetical_protein	JCM19241_1297
GAM74955	363536	363820	+	alpha-mannosidase	JCM19241_1298
GAM74956	363850	364128	+	alpha-mannosidase	JCM19241_1299
GAM74957	364125	364541	+	alpha-mannosidase	JCM19241_1300
GAM74958	364526	364945	+	alpha-mannosidase	JCM19241_1301
GAM74959	364977	365735	+	alpha-mannosidase	JCM19241_1302
GAM74960	365771	366601	+	alpha-mannosidase	JCM19241_1303
GAM74961	366745	367152	-	hypothetical_protein	JCM19241_1304
GAM74962	367182	368612	-	putative_glycosyl_hydrolase	JCM19241_1305
GAM74963	368613	369125	-	membrane_protein	JCM19241_1306
GAM74964	369122	369238	-	hypothetical_protein	JCM19241_1307
GAM74965	369238	369387	-	hypothetical_protein	JCM19241_1308
GAM74966	369573	370196	+	cAMP-binding_proteins	JCM19241_1309
GAM74967	370233	371519	-	enolase	JCM19241_1310
GAM74968	371780	372031	-	hypothetical_protein	JCM19241_1311
GAM74969	372217	372435	-	hypothetical_protein	JCM19241_1312
GAM74970	372653	373012	-	glutaredoxin	JCM19241_1313
GAM74971	373367	373993	-	membrane_protein	JCM19241_1314
GAM74972	374238	374762	+	metal-dependent_phosphohydrolase	JCM19241_1315
GAM74973	375073	376053	-	fructose_repressor_fruR	JCM19241_1316
GAM74974	376347	377465	+	fructose-specific_phosphocarrier_protein_HPr/PTS system	JCM19241_1317
GAM74975	377486	378448	+	1-phosphofructokinase	JCM19241_1318
GAM74976	378450	379124	+	PTS_system	JCM19241_1319
GAM74977	379087	380172	+	PTS_system	JCM19241_1320
GAM74978	380297	381520	+	aspartate_aminotransferase	JCM19241_1321
GAM74979	381554	381760	-	dodecin_flavin-binding	JCM19241_1322
GAM74980	381879	382013	-	transaldolase	JCM19241_1323
GAM74981	382091	382834	-	transaldolase	JCM19241_1324
GAM74982	382995	383744	-	molybdopterin_biosynthesis_protein_moeB	JCM19241_1325
GAM74983	383744	384988	-	molybdopterin_biosynthesis_protein_moeA	JCM19241_1326
GAM74984	385164	385817	+	GTP_cyclohydrolase_I_type_1	JCM19241_1327
GAM74985	385852	386202	-	tellurite_resistance_protein	JCM19241_1328
GAM74986	386199	386810	-	tellurite_resistance_protein	JCM19241_1329
GAM74987	387380	387499	+	hypothetical_protein	JCM19241_1330
GAM74988	387606	388583	+	putative_metal_chaperone	JCM19241_1331
GAM74989	388591	389418	-	putative_NAD(P)-dependent_oxidoreductase	JCM19241_1332
GAM74990	389510	389785	-	hypothetical_protein	JCM19241_1333
GAM74991	390087	390215	-	hypothetical_protein	JCM19241_1334
GAM74992	390202	391005	+	bll1341_protein	JCM19241_1335
GAM74993	391159	391848	-	hypothetical_protein	JCM19241_1336
GAM74994	391854	392303	-	hypothetical_protein	JCM19241_1337
GAM74995	392321	392902	-	cation-transporting_ATPase	JCM19241_1338
GAM74996	392914	393912	-	hypothetical_protein	JCM19241_1339
GAM74997	393982	394311	-	spermidine_export_protein_mdtI	JCM19241_1340
GAM74998	394323	394496	-	hypothetical_protein	JCM19241_1341
GAM74999	394493	394705	-	spermidine_export_protein_mdtJ	JCM19241_1342
GAM75000	395010	395123	+	hypothetical_protein	JCM19241_1343
GAM75001	395370	395537	-	hypothetical_protein	JCM19241_1344
GAM75002	395603	395719	-	hypothetical_protein	JCM19241_1345
GAM75003	395947	396618	+	hypothetical_protein	JCM19241_1346
GAM75004	396867	397949	+	hypothetical_protein	JCM19241_1347
GAM75005	398184	398615	+	Mg/Co/Ni_transporter_mgtE	JCM19241_1348
GAM75006	398600	399028	+	Mg/Co/Ni_transporter_mgtE	JCM19241_1349
GAM75007	399025	399186	-	hypothetical_protein	JCM19241_1350
GAM75008	399300	400244	-	50S_ribosomal_subunit_maturation_GTPase_rbgA	JCM19241_1351
Table of Blast hits (query gene, subject gene, %identity, blast score, %coverage, e-value):
Vas2_910_1027312-102	GAM74977	88	630	62.6527	3e-180
Vas2_910_1027312-102	GAM74976	72	330	37.8709	8e-90
Vas2_911_1029067-103	GAM74975	75	470	91.6667	2e-132
Vas2_912_1030046-103	GAM74974	73	559	98.9418	5e-159
Vas2_913_1031504-103	GAM74973	78	546	99.6933	3e-155
Vas2_932_1055651-105	GAM74963	43	136	60.3704	6e-32
Vas2_933_1056609-105	GAM74966	56	230	90.7767	2e-60
Vas2_934_1057289-105	GAM74937	45	330	83.7838	5e-90
>>
6. NZ_KB890423_0
Source: Lewinella persica DSM 23188 B036DRAFT_scaffold_18.19, whole genome shotgun sequence.
Number of proteins with BLAST hits to this cluster: 7
MultiGeneBlast score: 7.0
Cumulative Blast bit score: 2715
Table of genes, locations, strands and annotations of subject cluster:
WP_020568195	39663	40712	-	type_IX_secretion_system_membrane_protein	B036_RS0108100
WP_020568196	40860	45656	-	PKD_domain-containing_protein	B036_RS0108105
WP_020568197	45867	47351	-	hypothetical_protein	B036_RS0108110
WP_020568198	47785	49323	-	acyl-CoA_carboxylase_subunit_beta	B036_RS0108115
WP_020568199	49854	50678	-	rhomboid_family_intramembrane_serine_protease	B036_RS0108120
WP_020568200	50786	52909	-	methylmalonyl-CoA_mutase	scpA
WP_020568201	52909	54387	-	acetyl-CoA_carboxylase_biotin_carboxylase subunit	B036_RS0108130
WP_020568202	54480	55406	-	hypothetical_protein	B036_RS0108135
WP_020568203	55478	55957	-	biotin/lipoyl-binding_protein	B036_RS0108140
WP_020568204	56401	56835	+	hypothetical_protein	B036_RS0108145
WP_020568205	56965	58299	-	GntP_family_permease	B036_RS0108150
WP_020568206	58462	59337	+	AraC_family_transcriptional_regulator	B036_RS28525
WP_026231797	59530	60684	+	mandelate_racemase/muconate_lactonizing_enzyme family protein	B036_RS0108160
WP_020568208	60789	61787	+	hypothetical_protein	B036_RS0108165
WP_020568209	61938	63374	+	aldehyde_dehydrogenase_family_protein	B036_RS0108170
WP_020568210	63379	64329	+	2-dehydro-3-deoxygalactonokinase	B036_RS0108175
WP_020568211	64400	65032	+	bifunctional_4-hydroxy-2-oxoglutarate	eda
WP_157472085	65289	68438	+	SusC/RagA_family_TonB-linked_outer_membrane protein	B036_RS28530
WP_026231798	68499	70211	+	RagB/SusD_family_nutrient_uptake_outer_membrane protein	B036_RS0108190
WP_020568214	70575	72614	+	glycoside_hydrolase_family_127_protein	B036_RS0108195
WP_020568215	72669	74774	+	glycoside_hydrolase_family_127_protein	B036_RS0108200
WP_020568216	74783	76372	+	MFS_transporter	B036_RS0108205
WP_020568217	76535	78505	+	hypothetical_protein	B036_RS0108210
WP_020568218	78549	79955	+	sulfatase	B036_RS0108215
WP_020568219	80009	80986	+	family_16_glycosylhydrolase	B036_RS28535
WP_020568220	81007	81219	+	hypothetical_protein	B036_RS0108225
WP_157472086	81323	82918	+	sulfatase-like_hydrolase/transferase	B036_RS0108230
WP_020568222	83283	84866	-	arylsulfatase	B036_RS0108235
WP_044102145	84914	86392	-	sulfatase	B036_RS0108240
WP_026231802	86734	90753	-	response_regulator	B036_RS0108245
WP_020568225	91362	94472	+	TonB-dependent_receptor	B036_RS28540
WP_020568226	94494	96275	+	RagB/SusD_family_nutrient_uptake_outer_membrane protein	B036_RS28545
WP_020568227	97195	98604	+	sulfatase-like_hydrolase/transferase	B036_RS0108265
WP_083926163	98608	100479	+	T9SS_type_A_sorting_domain-containing_protein	B036_RS0108270
WP_020568229	100596	103871	-	hypothetical_protein	B036_RS0108275
Table of Blast hits (query gene, subject gene, %identity, blast score, %coverage, e-value):
Vas2_922_1041835-104	WP_020568219	38	191	91.1475	2e-48
Vas2_925_1045421-104	WP_020568216	41	405	98.6717	2e-112
Vas2_927_1048861-104	WP_020568219	39	187	95.3795	3e-47
Vas2_928_1050076-105	WP_020568219	38	183	48	1e-45
Vas2_929_1052442-105	WP_020568215	39	484	102.552	3e-136
Vas2_929_1052442-105	WP_020568217	38	452	102.233	1e-126
Vas2_929_1052442-105	WP_020568214	38	447	102.711	4e-125
Vas2_938_1060783-106	WP_020568211	37	110	91	3e-24
Vas2_940_1062366-106	WP_026231797	35	256	97.3753	6e-68
>>
7. NZ_MUZU01000010_1
Source: Colwellia agarivorans strain QM50 contig10, whole genome shotgun sequence.
Number of proteins with BLAST hits to this cluster: 7
MultiGeneBlast score: 7.0
Cumulative Blast bit score: 2686
Table of genes, locations, strands and annotations of subject cluster:
WP_077341777	81187	82200	+	zinc-binding_alcohol_dehydrogenase_family protein	B0X80_RS15180
WP_077341779	82211	83041	+	amidohydrolase_family_protein	B0X80_RS15185
WP_077341781	83051	83986	+	aldo/keto_reductase	B0X80_RS15190
WP_076419114	84462	85436	-	cytochrome-c_oxidase,_cbb3-type_subunit_III	ccoP
WP_077341783	85436	85633	-	CcoQ/FixQ_family_Cbb3-type_cytochrome_c_oxidase assembly chaperone	B0X80_RS15200
WP_076419112	85638	86282	-	cytochrome-c_oxidase,_cbb3-type_subunit_II	ccoO
WP_077341785	86293	87717	-	cytochrome-c_oxidase,_cbb3-type_subunit_I	ccoN
WP_077341787	87991	88491	+	hypothetical_protein	B0X80_RS15215
WP_077342004	88621	89475	+	FAD:protein_FMN_transferase	B0X80_RS15220
WP_076419108	89545	90657	-	DUF3083_family_protein	B0X80_RS15225
WP_077341789	91120	92226	-	hypothetical_protein	B0X80_RS15230
WP_077341791	92236	93123	-	DMT_family_transporter	B0X80_RS15235
WP_077341793	93126	93875	-	tRNA	tsaA
WP_077341795	93877	94275	-	hypothetical_protein	B0X80_RS15245
WP_077341797	94394	96514	-	methionine--tRNA_ligase	metG
WP_077341799	96651	97748	+	iron-sulfur_cluster_carrier_protein_ApbC	apbC
WP_077341801	97798	98391	+	dCTP_deaminase	B0X80_RS15260
WP_077341803	98435	99778	+	hypothetical_protein	B0X80_RS15265
WP_077341805	99855	100631	-	glucose_1-dehydrogenase	B0X80_RS15270
WP_077341807	100904	102469	+	MFS_transporter	B0X80_RS15275
WP_077341809	102560	103471	+	2-dehydro-3-deoxygalactonokinase	B0X80_RS15280
WP_077341811	103476	104114	+	2-dehydro-3-deoxy-6-phosphogalactonate_aldolase	B0X80_RS15285
WP_077341813	104196	105365	+	mandelate_racemase/muconate_lactonizing_enzyme family protein	B0X80_RS15290
WP_077341815	105539	106288	+	FadR_family_transcriptional_regulator	B0X80_RS15295
WP_077341817	106349	107845	-	tryptophan_7-halogenase	B0X80_RS15300
WP_077341819	107942	111100	-	TonB-dependent_receptor	B0X80_RS15305
WP_077341821	112186	113154	-	hypothetical_protein	B0X80_RS15310
WP_077341823	113267	113746	-	hypothetical_protein	B0X80_RS15315
WP_077341825	113785	114540	-	thioredoxin_fold_domain-containing_protein	B0X80_RS15320
WP_077341827	114606	115631	-	rhamnose/proton_symporter_RhaT	B0X80_RS15325
WP_139345331	116180	116425	+	hypothetical_protein	B0X80_RS15330
WP_077341831	116527	118068	+	sulfatase-like_hydrolase/transferase	B0X80_RS15335
WP_077341833	118139	119290	+	mandelate_racemase/muconate_lactonizing_enzyme family protein	B0X80_RS15340
WP_077341835	119287	120717	+	aldehyde_dehydrogenase_family_protein	B0X80_RS15345
WP_077341837	120778	122235	+	sulfatase-like_hydrolase/transferase	B0X80_RS15350
WP_077341839	122291	123754	+	sulfatase-like_hydrolase/transferase	B0X80_RS15355
WP_077341841	123960	127670	+	TonB-dependent_receptor	B0X80_RS15360
WP_077341843	127749	129530	+	Ig-like_domain-containing_protein	B0X80_RS15365
WP_077341845	129600	130643	+	family_16_glycosylhydrolase	B0X80_RS15370
WP_077341847	130659	131990	+	family_16_glycosylhydrolase	B0X80_RS15375
WP_089024899	132196	134025	+	SLC13_family_permease	B0X80_RS15380
WP_076420060	134033	134740	-	hypothetical_protein	B0X80_RS15385
WP_077341849	135224	135739	+	sigma-70_family_RNA_polymerase_sigma_factor	B0X80_RS15390
WP_077341851	135754	136803	+	DUF4974_domain-containing_protein	B0X80_RS15395
WP_077341853	136854	139829	+	TonB-dependent_receptor	B0X80_RS15400
WP_077341855	139983	140912	-	hypothetical_protein	B0X80_RS15405
WP_077341857	141005	142114	-	hypothetical_protein	B0X80_RS15410
WP_077341859	142221	144926	-	TonB-dependent_receptor	B0X80_RS15415
WP_077341861	145611	146492	-	SMP-30/gluconolactonase/LRE_family_protein	B0X80_RS15420
WP_077341863	146593	149949	-	glycoside_hydrolase_family_2	B0X80_RS15425
WP_077341865	150388	151410	+	LacI_family_transcriptional_regulator	B0X80_RS15430
WP_077341866	151431	152204	+	hydratase	B0X80_RS15435
Table of Blast hits (query gene, subject gene, %identity, blast score, %coverage, e-value):
Vas2_922_1041835-104	WP_077341847	42	209	101.967	1e-53
Vas2_922_1041835-104	WP_077341845	38	196	97.0492	8e-50
Vas2_925_1045421-104	WP_077341807	42	419	98.2922	1e-116
Vas2_927_1048861-104	WP_077341847	40	214	102.64	3e-55
Vas2_927_1048861-104	WP_077341845	37	190	97.6898	4e-48
Vas2_928_1050076-105	WP_077341847	53	480	72	5e-135
Vas2_928_1050076-105	WP_077341845	40	198	48	4e-50
Vas2_938_1060783-106	WP_077341811	61	258	99.5	5e-69
Vas2_939_1061396-106	WP_077341809	47	281	93.038	2e-75
Vas2_940_1062366-106	WP_077341833	34	241	101.312	2e-63
>>
8. CP018681_13
Source: Vibrio harveyi isolate QT520 chromosome 2, complete sequence.
Number of proteins with BLAST hits to this cluster: 6
MultiGeneBlast score: 6.0
Cumulative Blast bit score: 2641
Table of genes, locations, strands and annotations of subject cluster:
APP08630	1877553	1878344	+	uroporphyrinogen-III_C-methyltransferase	BG259_25725
APP08631	1878370	1879398	+	anaerobic_sulfite_reductase_subunit_A	BG259_25730
APP08632	1879398	1880198	+	anaerobic_sulfite_reductase_subunit_B	BG259_25735
APP08633	1880211	1881212	+	sulfite_reductase_subunit_C	BG259_25740
APP08634	1881220	1882365	+	cyclopropane-fatty-acyl-phospholipid_synthase	BG259_25745
APP08635	1882680	1882916	+	hypothetical_protein	BG259_25750
APP08636	1883011	1884381	-	L-serine_ammonia-lyase	BG259_25755
APP08637	1884393	1885934	-	sodium:solute_symporter	BG259_25760
APP08638	1886273	1887568	+	MFS_transporter	BG259_25765
APP08639	1887670	1888686	+	polyketide_cyclase	BG259_25770
APP08640	1888864	1889949	+	porin	BG259_25775
APP08641	1890207	1891214	+	LacI_family_transcriptional_regulator	BG259_25780
APP08642	1891407	1892036	+	recombinase	BG259_25785
APP08643	1892033	1893217	+	MFS_transporter	BG259_25790
APP08644	1893290	1894060	-	hypothetical_protein	BG259_25795
APP08645	1894083	1895024	-	hypothetical_protein	BG259_25800
APP08646	1895301	1895735	-	transporter	BG259_25805
APP08647	1895824	1897854	-	ligand-gated_channel_protein	BG259_25810
APP08648	1897990	1898931	-	LysR_family_transcriptional_regulator	BG259_25815
APP08649	1899135	1900055	+	ferric_anguibactin-binding_protein	BG259_25820
BG259_25825	1900131	1900346	+	hypothetical_protein	no_locus_tag
APP08650	1900413	1901369	+	iron_ABC_transporter	BG259_25830
APP08651	1901362	1902312	+	ABC_transporter_permease	BG259_25835
APP08652	1902324	1903085	+	iron_ABC_transporter_ATP-binding_protein	BG259_25840
APP08653	1903229	1903831	+	transcriptional_regulator	BG259_25845
APP08654	1903932	1905464	-	MFS_transporter	BG259_25850
APP08655	1905470	1906483	-	multidrug_transporter	BG259_25855
APP08656	1906731	1908464	-	hypothetical_protein	BG259_25860
APP08657	1908922	1909875	+	peptidase_M23	BG259_25865
APP08658	1909779	1910219	+	polymer-forming_cytoskeletal_family_protein	BG259_25870
APP08659	1910467	1910853	+	DUF2541_domain-containing_protein	BG259_25875
APP08660	1910951	1911379	-	hypothetical_protein	BG259_25880
APP08661	1911737	1912063	+	(2Fe-2S)-binding_protein	BG259_25885
APP08662	1912121	1914871	-	peptidase_M16	BG259_25890
APP08663	1915192	1917078	+	chemotaxis_protein	BG259_25895
APP08664	1917304	1918260	+	hypothetical_protein	BG259_25900
APP08665	1918463	1919560	+	transporter	BG259_25905
APP08666	1919639	1920061	-	organic_hydroperoxide_resistance_protein	BG259_25910
APP08667	1920199	1920657	+	MarR_family_transcriptional_regulator	BG259_25915
APP08668	1921232	1921789	+	peroxiredoxin	BG259_25920
APP08669	1921962	1923530	+	alkyl_hydroperoxide_reductase_subunit_F	BG259_25925
Table of Blast hits (query gene, subject gene, %identity, blast score, %coverage, e-value):
Vas2_915_1033643-103	APP08647	46	596	102.256	6e-170
Vas2_916_1035799-103	APP08648	62	409	98.3923	5e-114
Vas2_917_1036862-103	APP08649	57	359	92.459	6e-99
Vas2_918_1037832-103	APP08650	74	468	94.3574	7e-132
Vas2_919_1038919-103	APP08651	72	395	98.1752	4e-110
Vas2_920_1039748-104	APP08652	77	414	99.2095	8e-116
>>
9. NZ_CP014039_5
Source: Vibrio harveyi strain FDAARGOS_107 chromosome 2, complete sequence.
Number of proteins with BLAST hits to this cluster: 6
MultiGeneBlast score: 6.0
Cumulative Blast bit score: 2639
Table of genes, locations, strands and annotations of subject cluster:
WP_005374632	621728	622285	-	alkyl_hydroperoxide_reductase_subunit_C	ahpC
WP_005449646	622588	622725	-	YHYH_domain-containing_protein	AL538_RS21025
WP_005449645	622860	623318	-	MarR_family_transcriptional_regulator	AL538_RS21030
WP_005449644	623456	623878	+	organic_hydroperoxide_resistance_protein	AL538_RS21035
WP_061066123	623957	625054	-	YdcF_family_protein	AL538_RS21040
WP_033007529	625257	626213	-	hypothetical_protein	AL538_RS21045
WP_005449641	626439	628325	-	methyl-accepting_chemotaxis_protein	AL538_RS21050
WP_061066124	628645	631395	+	insulinase_family_protein	AL538_RS21055
WP_017818257	631453	631779	-	2Fe-2S_iron-sulfur_cluster_binding domain-containing protein	AL538_RS21060
WP_005449638	632133	632561	+	hypothetical_protein	AL538_RS21065
WP_061066125	632660	633046	-	DUF2541_family_protein	AL538_RS21070
WP_080628684	633294	633734	-	polymer-forming_cytoskeletal_protein	AL538_RS21075
WP_005449635	633638	634591	-	peptidoglycan_DD-metalloendopeptidase_family protein	AL538_RS21080
WP_061066126	635049	636782	+	hypothetical_protein	AL538_RS21085
WP_061066127	637030	638043	+	HlyD_family_secretion_protein	AL538_RS21090
WP_061066128	638049	639581	+	hypothetical_protein	AL538_RS21095
WP_029788701	639687	640289	-	TetR/AcrR_family_transcriptional_regulator	AL538_RS21100
WP_005449633	640433	641194	-	ATP-binding_cassette_domain-containing_protein	AL538_RS21105
WP_061066129	641206	642156	-	iron_chelate_uptake_ABC_transporter_family permease subunit	AL538_RS21110
WP_050922456	642149	643105	-	iron_chelate_uptake_ABC_transporter_family permease subunit	AL538_RS21115
WP_005449630	643197	644117	-	siderophore_ABC_transporter_substrate-binding protein	AL538_RS21120
WP_005429183	644321	645262	+	LysR_family_transcriptional_regulator	AL538_RS21125
WP_061066130	645398	647428	+	TonB-dependent_receptor	AL538_RS21130
WP_005449610	647517	647951	+	EamA_family_transporter	AL538_RS21135
WP_061066131	648228	649169	+	hypothetical_protein	AL538_RS21140
WP_017189873	649192	649962	+	hypothetical_protein	AL538_RS21145
WP_005449604	650035	651219	-	multidrug_effflux_MFS_transporter	AL538_RS21150
WP_005449602	651216	651845	-	recombinase_family_protein	AL538_RS21155
WP_009702792	652034	652270	-	hypothetical_protein	AL538_RS21160
WP_061066132	652585	653730	-	cyclopropane_fatty_acyl_phospholipid_synthase	AL538_RS21165
asrC	653738	655552	-	sulfite_reductase_subunit_C	no_locus_tag
WP_061066134	655552	656580	-	anaerobic_sulfite_reductase_subunit_AsrA	asrA
WP_038890465	656606	657397	-	uroporphyrinogen-III_C-methyltransferase	cobA
WP_081097998	657807	659528	-	GGDEF_domain-containing_protein	AL538_RS21185
WP_061066136	659781	661748	-	glycogen_debranching_protein_GlgX	glgX
WP_047514779	662195	663520	+	maltoporin	lamB
WP_005449574	663621	664430	+	maltose_operon_protein	AL538_RS21200
WP_029788722	664759	665265	+	glycosidase	AL538_RS21205
WP_061066137	665352	666974	+	glycosidase	AL538_RS21210
Table of Blast hits (query gene, subject gene, %identity, blast score, %coverage, e-value):
Vas2_915_1033643-103	WP_061066130	46	598	102.556	1e-170
Vas2_916_1035799-103	WP_005429183	62	409	98.3923	5e-114
Vas2_917_1036862-103	WP_005449630	57	358	92.459	1e-98
Vas2_918_1037832-103	WP_050922456	74	467	94.0439	2e-131
Vas2_919_1038919-103	WP_061066129	72	390	98.1752	1e-108
Vas2_920_1039748-104	WP_005449633	78	417	99.2095	2e-116
>>
10. CP003242_5
Source: Vibrio sp. EJY3 chromosome 2, complete sequence.
Number of proteins with BLAST hits to this cluster: 6
MultiGeneBlast score: 6.0
Cumulative Blast bit score: 2618
Table of genes, locations, strands and annotations of subject cluster:
AEX25159	1803833	1804702	-	pyridoxamine_kinase	VEJY3_23751
AEX25160	1804936	1806129	-	hypothetical_protein	VEJY3_23756
AEX25161	1806672	1810652	+	pullulanase_precursor	VEJY3_23761
AEX25162	1810830	1812425	-	glycosidase	VEJY3_23766
AEX25163	1812515	1813021	-	glycosidase	VEJY3_23771
AEX25164	1813319	1814128	-	maltose_operon_periplasmic_protein	VEJY3_23776
AEX25165	1814230	1815507	-	maltoporin	lamB
AEX25166	1815964	1817946	+	glycogen_debranching_enzyme	VEJY3_23786
AEX25167	1818051	1819037	-	LacI_family_transcriptional_regulator,_sucrose operon repressor	VEJY3_23791
AEX25168	1819425	1820864	+	PTS_system,_sucrose-specific_IIBC_component	VEJY3_23796
AEX25169	1821121	1821765	+	resolvase	VEJY3_23801
AEX25170	1821762	1822973	+	multidrug_resistance_protein_D	VEJY3_23806
AEX25171	1823045	1825075	-	hypothetical_protein	VEJY3_23811
AEX25172	1825213	1826151	-	LysR_family_transcriptional_regulator	VEJY3_23816
AEX25173	1826348	1827268	+	periplasmic_binding_protein	VEJY3_23821
AEX25174	1827357	1828313	+	transport_system_permease	VEJY3_23826
AEX25175	1828306	1829256	+	transport_system_permease	VEJY3_23831
AEX25176	1829268	1830029	+	ABC_transporter	VEJY3_23836
AEX25177	1830152	1830763	+	transcriptional_regulator	VEJY3_23841
AEX25178	1830830	1832368	-	hypothetical_protein	VEJY3_23846
AEX25179	1832375	1833388	-	multidrug_resistance_efflux_pump	VEJY3_23851
AEX25180	1834246	1835706	+	tryptophanase/L-cysteine_desulfhydrase, PLP-dependent	tnaA
AEX25181	1835774	1836988	+	tryptophan-specific_transport_protein	VEJY3_23861
AEX25182	1837238	1837585	+	endoribonuclease_L-PSP	VEJY3_23866
AEX25183	1837636	1838388	-	hydrolase	VEJY3_23871
AEX25184	1838410	1838742	-	hypothetical_protein	VEJY3_23876
AEX25185	1838986	1839411	-	DoxX_family_protein	VEJY3_23881
AEX25186	1839579	1840442	-	LysR_family_transcriptional_regulator	VEJY3_23886
AEX25187	1840561	1840875	+	small_multidrug_resistance_protein	VEJY3_23891
AEX25188	1840964	1841797	-	transcriptional_regulator	VEJY3_23896
AEX25189	1841916	1842563	+	glutathione_S-transferase	VEJY3_23901
AEX25190	1842636	1844132	-	methylmalonate-semialdehyde_dehydrogenase	VEJY3_23906
AEX25191	1844158	1845498	-	beta_alanine--pyruvate_transaminase	VEJY3_23911
AEX25192	1845848	1846762	+	regulatory_protein_LysR	VEJY3_23916
AEX25193	1847026	1848225	+	ornithine_decarboxylase	VEJY3_23921
AEX25194	1848351	1849238	-	LysR_family_transcriptional_regulator	VEJY3_23926
AEX25195	1849376	1849762	+	L-ectoine_synthase	ectC
AEX25196	1849812	1851263	+	sodium/proline_symporter	VEJY3_23936
Table of Blast hits (query gene, subject gene, %identity, blast score, %coverage, e-value):
Vas2_915_1033643-103	AEX25171	47	609	101.504	7e-174
Vas2_916_1035799-103	AEX25172	61	399	98.3923	6e-111
Vas2_917_1036862-103	AEX25173	54	343	92.459	4e-94
Vas2_918_1037832-103	AEX25174	72	470	100	2e-132
Vas2_919_1038919-103	AEX25175	72	380	95.2555	2e-105
Vas2_920_1039748-104	AEX25176	78	417	99.2095	2e-116
>>
11. BBSC01000006_0
Source: Vibrio ishigakensis DNA, contig00006, strain: JCM19241, whole genome shotgun sequence.
Number of proteins with BLAST hits to this cluster: 6
MultiGeneBlast score: 6.0
Cumulative Blast bit score: 2549
Table of genes, locations, strands and annotations of subject cluster:
GAM76400	92532	93296	+	membrane_fusion_protein	JCM19241_3937
GAM76401	94139	94522	+	membrane_protein	JCM19241_3938
GAM76402	95062	95469	+	signal_peptide_protein	JCM19241_3939
GAM76403	95697	95822	+	hypothetical_protein	JCM19241_3940
GAM76404	95857	97218	-	von_willebrand_factor_type_A_domain_protein	JCM19241_3941
GAM76405	97229	97738	-	hypothetical_protein	JCM19241_3942
GAM76406	97802	98143	-	hypothetical_protein	JCM19241_3943
GAM76407	98607	99209	-	5-methyltetrahydropteroyltriglutamate- homocysteine methyltransferase	JCM19241_3944
GAM76408	99206	99433	-	5-methyltetrahydropteroyltriglutamate- homocysteine methyltransferase	JCM19241_3945
GAM76409	99789	100865	-	5-methyltetrahydropteroyltriglutamate- homocysteine methyltransferase	JCM19241_3946
GAM76410	101052	101480	+	transcriptional_activator_metR	JCM19241_3947
GAM76411	101477	101935	+	transcriptional_activator_metR	JCM19241_3948
GAM76412	102076	102633	+	N-acetylglutamate_synthase	JCM19241_3949
GAM76413	102620	105400	-	D-lactate_dehydrogenase	JCM19241_3950
GAM76414	105435	106598	-	multidrug_resistance_protein_D	JCM19241_3951
GAM76415	106739	107989	-	sensor_histidine_kinase	JCM19241_3952
GAM76416	108086	108343	-	response_regulator_in_two-component_regulatory system	JCM19241_3953
GAM76417	108334	108771	-	response_regulator_in_two-component_regulatory system	JCM19241_3954
GAM76418	108784	109344	-	lipoprotein	JCM19241_3955
GAM76419	109558	109896	-	naphthoate_synthase	JCM19241_3956
GAM76420	109893	110243	-	naphthoate_synthase	JCM19241_3957
GAM76421	110276	110446	-	naphthoate_synthase	JCM19241_3958
GAM76422	110647	112053	+	exported_zinc_metalloprotease_yfgC_precursor	JCM19241_3959
GAM76423	112115	112309	-	iron_compound_ABC_uptake_transporter	JCM19241_3960
GAM76424	112303	112425	-	catechol_siderophore_ABC_transporter	JCM19241_3961
GAM76425	112383	112871	-	catechol_siderophore_ABC_transporter	JCM19241_3962
GAM76426	112874	113824	-	catechol_siderophore_ABC_transporter	JCM19241_3963
GAM76427	113817	113951	-	catechol_siderophore_ABC_transporter	JCM19241_3964
GAM76428	113945	114694	-	catechol_siderophore_ABC_transporter	JCM19241_3965
GAM76429	114791	115159	-	catechol_siderophore_ABC_transporter	JCM19241_3966
GAM76430	115165	115368	-	hypothetical_protein	JCM19241_3967
GAM76431	115374	115712	-	catechol_siderophore_ABC_transporter	JCM19241_3968
GAM76432	115812	116174	+	transcriptional_regulator	JCM19241_3969
GAM76433	116198	116464	+	transcriptional_regulator	JCM19241_3970
GAM76434	116499	116747	+	transcriptional_regulator	JCM19241_3971
GAM76435	116898	118877	+	colicin_I_receptor_precursor	JCM19241_3972
GAM76436	119130	119555	+	hypothetical_protein	JCM19241_3973
GAM76437	119572	120615	-	membrane_protein	JCM19241_3974
GAM76438	120605	121735	-	membrane_fusion_protein	JCM19241_3975
GAM76439	121810	122340	-	hypothetical_protein	JCM19241_3976
GAM76440	122567	122809	-	hypothetical_protein	JCM19241_3977
GAM76441	123132	123548	+	inosine_monophosphate_dehydrogenase-related protein	JCM19241_3978
GAM76442	123723	124490	+	uridine_phosphorylase	JCM19241_3979
GAM76443	124544	124699	-	hypothetical_protein	JCM19241_3980
GAM76444	124720	125709	-	hypothetical_protein	JCM19241_3981
GAM76445	125974	126324	+	ycfF/hinT_protein	JCM19241_3982
GAM76446	126324	126743	+	hypothetical_protein	JCM19241_3983
GAM76447	126728	127690	+	hypothetical_protein	JCM19241_3984
GAM76448	127722	128114	+	ycfL_protein	JCM19241_3985
GAM76449	128124	128714	+	lipoprotein_ycfM	JCM19241_3986
GAM76450	128929	129468	+	ycfP_protein	JCM19241_3987
GAM76451	129777	131066	+	NADH_dehydrogenase	JCM19241_3988
GAM76452	131126	131380	-	hypothetical_protein	JCM19241_3989
GAM76453	131500	131928	-	hypothetical_protein	JCM19241_3990
GAM76454	132004	132711	-	transcription-repair_coupling_factor	JCM19241_3991
GAM76455	132705	135458	-	transcription-repair_coupling_factor	JCM19241_3992
GAM76456	135788	136720	+	lipoprotein_releasing_system_transmembrane protein lolC	JCM19241_3993
GAM76457	136717	136911	+	lipoprotein_releasing_system_transmembrane protein lolC	JCM19241_3994
GAM76458	136904	137266	+	lipoprotein_releasing_system_ATP-binding_protein lolD	JCM19241_3995
GAM76459	137244	137600	+	lipoprotein_releasing_system_ATP-binding_protein lolD	JCM19241_3996
GAM76460	137836	137961	+	lipoprotein_releasing_system_transmembrane protein lolE	JCM19241_3997
GAM76461	137991	138839	+	lipoprotein_releasing_system_transmembrane protein lolE	JCM19241_3998
Table of Blast hits (query gene, subject gene, %identity, blast score, %coverage, e-value):
Vas2_915_1033643-103	GAM76435	66	919	100	0
Vas2_916_1035799-103	GAM76432	58	134	36.0129	3e-31
Vas2_916_1035799-103	GAM76434	52	101	25.0804	2e-21
Vas2_917_1036862-103	GAM76429	54	150	40	5e-36
Vas2_917_1036862-103	GAM76431	54	118	35.4098	2e-26
Vas2_917_1036862-103	GAM76430	60	68	15.082	2e-11
Vas2_918_1037832-103	GAM76428	76	374	74.6082	1e-103
Vas2_918_1037832-103	GAM76427	70	73	13.7931	9e-13
Vas2_919_1038919-103	GAM76426	66	362	98.1752	7e-100
Vas2_920_1039748-104	GAM76425	82	250	58.1028	2e-66
>>
12. NZ_AUBY01000008_1
Source: Aliagarivorans marinus DSM 23064 G461DRAFT_scaffold00004.4_C, whole genome shotgun sequence.
Number of proteins with BLAST hits to this cluster: 6
MultiGeneBlast score: 6.0
Cumulative Blast bit score: 2398
Table of genes, locations, strands and annotations of subject cluster:
WP_026970487	323672	324109	-	GNAT_family_N-acetyltransferase	G461_RS0101510
WP_026970488	324131	324625	-	N-acetyltransferase	G461_RS0101515
WP_026970489	324693	325439	-	metallophosphoesterase_family_protein	G461_RS0101520
WP_084428909	325666	328152	-	carbohydrate-binding_protein	G461_RS0101525
WP_026970491	328615	329223	-	HAD-IA_family_hydrolase	G461_RS0101530
WP_026970492	329292	329897	-	class_I_SAM-dependent_methyltransferase	G461_RS0101535
WP_026970493	330096	332099	-	bifunctional_metallophosphatase/5'-nucleotidase	G461_RS0101540
WP_026970494	332320	332799	-	NUDIX_domain-containing_protein	G461_RS0101545
WP_157360201	332973	334199	+	hypothetical_protein	G461_RS0101550
WP_026970496	334221	335120	-	LysR_family_transcriptional_regulator	G461_RS0101555
WP_026970497	335244	336383	+	FMN-dependent_L-lactate_dehydrogenase_LldD	lldD
WP_026970498	336417	337028	-	sugar_O-acetyltransferase	G461_RS0101565
WP_026970499	337182	337562	-	hypothetical_protein	G461_RS0101570
WP_026970500	337679	338032	-	hypothetical_protein	G461_RS0101575
WP_157360203	338579	341125	-	DUF5110_domain-containing_protein	G461_RS22950
WP_051333281	341433	341900	-	hypothetical_protein	G461_RS0101590
WP_026970503	341956	343197	-	hypothetical_protein	G461_RS0101595
WP_026970504	343494	345473	-	TonB-dependent_receptor	G461_RS0101600
WP_051333282	345592	346545	-	LysR_family_transcriptional_regulator	G461_RS0101605
WP_026970506	346701	347618	+	ABC_transporter_substrate-binding_protein	G461_RS0101610
WP_035478797	347672	348631	+	iron_chelate_uptake_ABC_transporter_family permease subunit	G461_RS0101615
WP_026970508	348624	349574	+	iron_chelate_uptake_ABC_transporter_family permease subunit	G461_RS0101620
WP_026970509	349577	350347	+	ATP-binding_cassette_domain-containing_protein	G461_RS0101625
WP_026970510	350536	351468	-	sel1_repeat_family_protein	G461_RS0101630
WP_026970511	351519	351926	-	hypothetical_protein	G461_RS0101635
WP_157360204	352331	354256	+	hypothetical_protein	G461_RS0101640
WP_026970513	354328	356139	-	methyltransferase_domain-containing_protein	G461_RS0101645
WP_157360206	356143	357042	-	hypothetical_protein	G461_RS25760
WP_157360207	357227	359113	-	methyltransferase_domain-containing_protein	G461_RS25315
WP_084428913	359317	359928	-	YbjN_domain-containing_protein	G461_RS0101665
WP_084428915	360312	360902	-	YbjN_domain-containing_protein	G461_RS0101670
WP_026970517	361074	361589	-	GNAT_family_N-acetyltransferase	G461_RS25320
WP_026970518	361738	362136	-	fosfomycin_resistance_glutathione_transferase	fos
WP_051333284	362138	363376	-	multidrug_effflux_MFS_transporter	G461_RS22970
WP_026970519	363376	364203	-	siderophore-interacting_protein	G461_RS0101690
WP_026970520	364225	364851	-	hypothetical_protein	G461_RS0101695
WP_026970521	365062	366504	-	DUF5107_domain-containing_protein	G461_RS0101700
WP_035478804	366861	368972	+	methyl-accepting_chemotaxis_protein	G461_RS0101705
WP_026970523	369086	370138	+	aldo/keto_reductase	G461_RS0101710
WP_035478807	370194	371777	-	cellulase_family_glycosylhydrolase	G461_RS0101715
Table of Blast hits (query gene, subject gene, %identity, blast score, %coverage, e-value):
Vas2_915_1033643-103	WP_026970504	48	603	98.9474	5e-172
Vas2_916_1035799-103	WP_051333282	41	268	100	9e-72
Vas2_917_1036862-103	WP_026970506	47	306	96.7213	5e-83
Vas2_918_1037832-103	WP_035478797	76	477	93.1034	2e-134
Vas2_919_1038919-103	WP_026970508	66	346	98.1752	3e-95
Vas2_920_1039748-104	WP_026970509	74	398	99.6047	6e-111
>>
13. CP005973_4
Source: Photobacterium gaetbulicola Gung47 chromosome 1, complete sequence.
Number of proteins with BLAST hits to this cluster: 6
MultiGeneBlast score: 6.0
Cumulative Blast bit score: 2168
Table of genes, locations, strands and annotations of subject cluster:
AJR05300	316916	317653	+	glycerophosphoryl_diester_phosphodiesterase	H744_1c0275
AJR05301	317693	318988	+	MFS_transporter	H744_1c0276
AJR05302	319872	321437	-	deoxyribodipyrimidine_photolyase-related protein	H744_1c0277
AJR05303	321459	322772	-	deoxyribodipyrimidine_photolyase	H744_1c0278
AJR05304	322884	323537	-	hexapeptide-repeat_containing-acetyltransferase	H744_1c0279
AJR05305	323449	324171	-	DNA-binding_transcriptional_repressor_MngR	H744_1c0280
AJR05306	325200	326354	+	putative_aminotransferase_class_V	H744_1c0281
AJR05307	326407	327306	+	putative_dihydrodipicolinate_synthase	H744_1c0282
AJR05308	328109	328978	+	hypothetical_protein	H744_1c0283
AJR05309	328975	329412	+	hypothetical_protein	H744_1c0284
AJR05310	329476	330648	+	hypothetical_protein	H744_1c0285
AJR05311	330652	331734	+	putative_dehydrogenase	H744_1c0286
AJR05312	331878	333578	+	2-isopropylmalate_synthase	H744_1c0287
AJR05313	333668	335881	-	hypothetical_protein	H744_1c0288
AJR05314	336216	337766	+	sugar_transporter	H744_1c0289
AJR05315	337951	339033	+	hypothetical_protein	H744_1c0290
AJR05316	339044	340207	+	NADH-dependent_alcohol_dehydrogenase	H744_1c0291
AJR05317	340575	341591	+	transcriptional_regulator,_periplasmic_binding protein of LacI family protein	H744_1c0292
AJR05318	341682	344549	-	putative_agarase	H744_1c0293
AJR05319	344603	345892	-	putative_maltoporin	H744_1c0294
AJR05320	346004	348259	-	GTPase_EngC	H744_1c0295
AJR05321	348344	349612	-	hypothetical_protein	H744_1c0296
AJR05322	350021	351037	+	transcriptional_regulator,_periplasmic_binding protein of LacI family protein	H744_1c0297
AJR05323	351112	351987	-	putative_MTA/SAH_nucleosidase	H744_1c0298
AJR05324	352310	352765	-	hypothetical_protein	H744_1c0299
AJR05325	353172	353897	+	putative_IclR_family_transcriptional_regulator	H744_1c0300
AJR05326	353951	355006	+	putative_C4-dicarboxylate_transport_system (C4-dicarboxylate-binding protein)	H744_1c0301
AJR05327	355074	355571	+	putative_Tripartite_ATP-independent_periplasmic transporter DctQ component	H744_1c0302
AJR05328	355583	356851	+	C4-dicarboxylate_transport_system_(permease large protein)	H744_1c0303
AJR05329	356864	358009	+	putative_mandelate_racemase/muconate lactonizing-like protein	H744_1c0304
AJR05330	358071	358994	+	putative_2-keto-3-deoxy-galactonokinase	H744_1c0305
AJR05331	358984	359619	+	2-dehydro-3-deoxy-6-phosphogalactonate_aldolase	H744_1c0306
AJR05332	359708	361096	-	putative_aminooxidase	H744_1c0307
AJR05333	360940	362556	-	putative_FAD_dependent_oxidoreductase	H744_1c0308
AJR05334	362667	362978	-	hypothetical_protein	H744_1c0309
AJR05335	363405	366461	+	beta-D-galactosidase	H744_1c0310
AJR05336	366531	367883	+	melibiose:sodium_symporter	H744_1c0311
AJR05337	367906	368868	+	hypothetical_protein	H744_1c0312
AJR05338	368914	370491	+	putative_xylanase	H744_1c0313
AJR05339	370544	371545	-	LacI_family_transcriptional_regulator	H744_1c0314
AJR05340	371834	372700	+	putative_glutathione_S-transferase_YghU	H744_1c0315
AJR05341	372854	373225	-	hypothetical_protein	H744_1c0316
AJR05342	373233	373541	-	hypothetical_protein	H744_1c0317
AJR05343	373670	374569	+	putative_transcriptional_regulator	H744_1c0318
AJR05344	374637	375134	-	hypothetical_protein	H744_1c0319
AJR05345	375225	376031	-	putative_transcriptional_regulator,_AraC_family	H744_1c0320
AJR05346	376230	377249	+	bile_acid:sodium_symporter	H744_1c0321
AJR05347	377296	378210	-	hypothetical_protein	H744_1c0322
AJR05348	378391	379287	+	putative_glycine_cleavage_operon_activator	H744_1c0323
AJR05349	379470	379847	+	translation_initiation_inhibitor	H744_1c0324
Table of Blast hits (query gene, subject gene, %identity, blast score, %coverage, e-value):
Vas2_924_1043819-104	AJR05319	32	178	107.481	2e-44
Vas2_925_1045421-104	AJR05314	44	445	98.1025	1e-124
Vas2_935_1058702-105	AJR05325	74	379	100	4e-105
Vas2_938_1060783-106	AJR05331	60	231	99	7e-61
Vas2_939_1061396-106	AJR05330	48	316	95.2532	6e-86
Vas2_940_1062366-106	AJR05329	76	619	100	5e-177
>>
14. NZ_FLQZ01000176_0
Source: Vibrio celticus strain CECT 7224, whole genome shotgun sequence.
Number of proteins with BLAST hits to this cluster: 6
MultiGeneBlast score: 6.0
Cumulative Blast bit score: 1344
Table of genes, locations, strands and annotations of subject cluster:
WP_065677799	47016	49238	+	hypothetical_protein	VCE7224_RS22420
WP_065677800	49238	49762	+	hypothetical_protein	VCE7224_RS22425
VCE7224_RS22430	49952	50668	+	iron-containing_alcohol_dehydrogenase	no_locus_tag
WP_065677801	50844	51767	+	hypothetical_protein	VCE7224_RS22435
WP_004730224	51882	52316	-	YccF_domain-containing_protein	VCE7224_RS22440
WP_065677802	52792	53868	-	threonine_aldolase	VCE7224_RS22445
WP_065677803	54172	54789	+	potassium_transporter_KefG	VCE7224_RS22450
WP_048608770	54789	56714	+	potassium_transporter	VCE7224_RS22455
WP_065677804	57255	58478	+	DUF819_family_protein	VCE7224_RS22460
WP_065677805	58565	59425	-	hypothetical_protein	VCE7224_RS22465
WP_083994427	59622	59777	-	L-threonine_3-dehydrogenase	VCE7224_RS24465
VCE7224_RS22475	61185	61312	-	IS3_family_transposase	no_locus_tag
WP_065677807	61669	62676	-	Ldh_family_oxidoreductase	VCE7224_RS22480
WP_065677808	62688	63704	-	zinc-binding_alcohol_dehydrogenase_family protein	VCE7224_RS22485
WP_065677809	63715	65181	-	mannitol_dehydrogenase_family_protein	VCE7224_RS22490
WP_065677810	65550	66497	+	sugar_kinase	VCE7224_RS22495
WP_065677811	66514	67140	+	bifunctional_4-hydroxy-2-oxoglutarate	VCE7224_RS22500
WP_065677812	67166	68254	+	mandelate_racemase/muconate_lactonizing_enzyme family protein	VCE7224_RS22505
VCE7224_RS25195	68510	68647	-	IS5/IS1182_family_transposase	no_locus_tag
WP_065677813	68981	70141	-	galactokinase	galK
WP_065677814	71117	71518	-	hypothetical_protein	VCE7224_RS22515
WP_065677815	71541	72815	-	oligosaccharide_MFS_transporter	VCE7224_RS22520
WP_065677816	73172	74179	-	Ldh_family_oxidoreductase	VCE7224_RS22525
WP_065677817	74627	75709	+	family_43_glycosylhydrolase	VCE7224_RS22530
VCE7224_RS24470	76375	76902	+	IS3_family_transposase	no_locus_tag
WP_065677818	77036	77221	+	hypothetical_protein	VCE7224_RS22535
WP_065677819	77623	78405	+	DNA-binding_transcriptional_regulator_KdgR	kdgR
WP_065677820	78494	79690	-	right-handed_parallel_beta-helix repeat-containing protein	VCE7224_RS22545
WP_065677821	79948	81732	-	transporter	VCE7224_RS22550
WP_065677822	82168	83319	-	iron-containing_alcohol_dehydrogenase	VCE7224_RS22555
WP_065677823	83450	84268	-	sulfite_exporter_TauE/SafE_family_protein	VCE7224_RS22560
WP_065677824	84419	85048	+	Crp/Fnr_family_transcriptional_regulator	VCE7224_RS22565
WP_065677825	85045	85410	+	DUF202_domain-containing_protein	VCE7224_RS22570
WP_065677826	85407	85688	+	DUF202_domain-containing_protein	VCE7224_RS22575
WP_065677827	85685	86971	+	anaerobic_sulfatase_maturase	VCE7224_RS22580
WP_065677828	87358	88731	-	sulfatase-like_hydrolase/transferase	VCE7224_RS22585
WP_065677829	88779	89093	-	L-rhamnose_mutarotase	rhaM
WP_065677830	89105	89917	-	rhamnulose-1-phosphate_aldolase	rhaD
WP_065677831	89917	91182	-	L-rhamnose_isomerase	VCE7224_RS22600
WP_065677832	91195	92568	-	rhamnulokinase	rhaB
VCE7224_RS22610	93225	93584	-	transposase	no_locus_tag
VCE7224_RS22615	93597	94350	-	IS5_family_transposase	no_locus_tag
WP_065677836	94703	96115	+	hypothetical_protein	VCE7224_RS22620
WP_065677833	96192	96449	-	hypothetical_protein	VCE7224_RS22625
VCE7224_RS25200	96690	96866	-	IS4_family_transposase	no_locus_tag
Table of Blast hits (query gene, subject gene, %identity, blast score, %coverage, e-value):
Vas2_930_1054963-105	WP_065677825	73	142	98.3607	3e-34
Vas2_931_1055328-105	WP_065677826	50	87	98.8764	1e-17
Vas2_932_1055651-105	WP_065677823	63	246	95.9259	4e-65
Vas2_933_1056609-105	WP_065677824	60	233	86.4078	2e-61
Vas2_934_1057289-105	WP_065677827	63	544	98.7715	2e-154
Vas2_938_1060783-106	WP_065677811	38	92	78	9e-19
>>
15. BBMQ01000229_0
Source: Vibrio sp. C7 DNA, contig: contig00052, strain: JCM 19233, whole genome shotgun sequence.
Number of proteins with BLAST hits to this cluster: 5
MultiGeneBlast score: 5.0
Cumulative Blast bit score: 3420
Table of genes, locations, strands and annotations of subject cluster:
GAL14398	1935	2450	+	putative_membrane_protein	JCM19233_5410
GAL14399	2492	3013	+	putative_exported_protein	JCM19233_5411
GAL14400	3032	3850	+	nikel_transport_family_protein_NikM	JCM19233_5412
GAL14401	3919	4167	+	hypothetical_protein	JCM19233_5413
GAL14402	4187	4723	+	hypothetical_protein	JCM19233_5414
GAL14403	4736	4990	+	hypothetical_protein	JCM19233_5415
GAL14404	4956	5636	+	cation_ABC_transporter_periplasmic cation-binding protein	JCM19233_5416
GAL14405	5636	6103	+	ABC_transporter_in_pyoverdin_gene_cluster ATP-binding component	JCM19233_5417
GAL14406	6121	6357	+	manganese_transport_system_ATP-binding_protein mntA	JCM19233_5418
GAL14407	6357	7238	+	ABC_transporter_in_pyoverdin_gene_cluster permease component	JCM19233_5419
GAL14408	7244	7621	+	ABC-type_metal_ion_transport_system_periplasmic	JCM19233_5420
GAL14409	7591	8118	+	ABC-type_metal_ion_transport_system_periplasmic	JCM19233_5421
GAL14410	8350	8721	-	hypothetical_protein	JCM19233_5422
GAL14411	8831	8989	-	hypothetical_protein	JCM19233_5423
GAL14412	9306	9497	-	fructose_repressor_FruR_LacI_family	JCM19233_5424
GAL14413	9466	10284	-	fructose_repressor_FruR_LacI_family	JCM19233_5425
GAL14414	10608	10946	+	fructose-specific_phosphocarrier_protein_HPr	JCM19233_5426
GAL14415	10925	11305	+	fructose-specific_phosphocarrier_protein_HPr	JCM19233_5427
GAL14416	11341	11742	+	fructose-specific_phosphocarrier_protein_HPr	JCM19233_5428
GAL14417	11747	12757	+	1-phosphofructokinase	JCM19233_5429
GAL14418	12754	14475	+	PTS_systemfructose-specific_IIB_/IIC_component	JCM19233_5430
GAL14419	15245	15580	+	crossover_junction_endodeoxyribonuclease_RuvC	JCM19233_5431
GAL14420	15715	16326	+	Holliday_junction_DNA_helicase_RuvA	JCM19233_5432
GAL14421	16465	16758	+	Holliday_junction_DNA_helicase_RuvB	JCM19233_5433
GAL14422	16796	17341	+	Holliday_junction_DNA_helicase_RuvB	JCM19233_5434
GAL14423	17783	17911	+	cytochrome_d_ubiquinol_oxidase_subunit_I	JCM19233_5435
GAL14424	17911	18504	+	cytochrome_d_ubiquinol_oxidase_subunit_I	JCM19233_5436
GAL14425	18470	18829	+	cytochrome_d_ubiquinol_oxidase_subunit_I	JCM19233_5437
GAL14426	18808	19374	+	cytochrome_d_ubiquinol_oxidase_subunit_I	JCM19233_5438
GAL14427	19390	19836	+	cytochrome_d_ubiquinol_oxidase_subunit_II	JCM19233_5439
GAL14428	19809	20327	+	cytochrome_d_ubiquinol_oxidase_subunit_II	JCM19233_5440
GAL14429	20327	20524	+	cytochrome_d_ubiquinol_oxidase_subunit_II	JCM19233_5441
GAL14430	20636	20938	+	protein_YbgE	JCM19233_5442
GAL14431	21122	21541	+	4-hydroxybenzoyl-CoA_thioesterase_family_active site	JCM19233_5443
GAL14432	21531	22220	+	MotA/TolQ/ExbB_proton_channel_family_protein	JCM19233_5444
GAL14433	22243	22686	+	Tol_biopolymer_transport_system	JCM19233_5445
GAL14434	22687	23004	+	hypothetical_protein	JCM19233_5446
GAL14435	23147	23740	+	TolA_protein	JCM19233_5447
GAL14436	23927	25207	+	tolB_protein_precursor	JCM19233_5448
GAL14437	25226	25777	+	OmpA/MotB_precursor	JCM19233_5449
GAL14438	25834	26616	+	TPR_repeat_containing_exported_protein	JCM19233_5450
Table of Blast hits (query gene, subject gene, %identity, blast score, %coverage, e-value):
Vas2_910_1027312-102	GAL14418	99	1136	100	0
Vas2_911_1029067-103	GAL14417	96	634	99.6914	0
Vas2_912_1030046-103	GAL14416	98	260	35.1852	5e-69
Vas2_912_1030046-103	GAL14415	97	224	30.1587	4e-58
Vas2_912_1030046-103	GAL14414	100	212	26.7196	1e-54
Vas2_913_1031504-103	GAL14413	98	514	77.6074	1e-145
Vas2_913_1031504-103	GAL14412	98	126	19.3252	7e-29
Vas2_914_1032803-103	GAL14410	89	212	47.0356	6e-55
Vas2_914_1032803-103	GAL14411	93	102	19.3676	1e-21
>>
16. NZ_CP009618_2
Source: Vibrio coralliilyticus strain RE98 chromosome 2, complete sequence.
Number of proteins with BLAST hits to this cluster: 5
MultiGeneBlast score: 5.0
Cumulative Blast bit score: 2519
Table of genes, locations, strands and annotations of subject cluster:
WP_043010356	975997	976305	+	hypothetical_protein	IX92_RS20520
WP_052126587	976339	976779	-	S-adenosylhomocysteine_hydrolase	IX92_RS20525
WP_043011060	977237	977671	+	hypothetical_protein	IX92_RS20530
IX92_RS20535	977705	978177	-	GNAT_family_N-acetyltransferase	no_locus_tag
WP_019274602	978734	978883	-	YoaH_family_protein	IX92_RS29010
WP_043010357	978951	980165	-	conjugal_transfer_protein_TraF	IX92_RS20540
WP_043010358	980225	981097	-	DUF2861_family_protein	IX92_RS20545
WP_006960996	981097	981756	-	response_regulator_transcription_factor	IX92_RS20550
WP_021455470	981731	983230	-	DUF3404_domain-containing_protein	IX92_RS20555
WP_038164611	983334	984710	-	Re/Si-specific_NAD(P)(+)_transhydrogenase subunit beta	pntB
WP_043010359	984723	986258	-	Re/Si-specific_NAD(P)(+)_transhydrogenase subunit alpha	pntA
WP_043010361	986554	986835	-	transcriptional_regulator	IX92_RS20570
WP_006960991	986847	987218	-	late_competence_development_ComFB_family protein	IX92_RS20575
WP_043010362	987440	988675	+	GGDEF_domain-containing_protein	IX92_RS20580
WP_043010363	988742	989674	-	diguanylate_cyclase	IX92_RS20585
WP_043010364	989850	990287	+	DUF3069_domain-containing_protein	IX92_RS20590
WP_043010365	990327	991433	-	molybdenum_ABC_transporter_ATP-binding_protein ModC	modC
WP_043010366	991430	992122	-	molybdate_ABC_transporter_permease_subunit	modB
WP_043010367	992134	992880	-	molybdate_ABC_transporter_substrate-binding protein	modA
WP_080748896	992886	994349	-	cobyric_acid_synthase	IX92_RS20610
WP_043010369	994520	994888	+	NirD/YgiW/YdeI_family_stress_tolerance_protein	IX92_RS20615
WP_006960975	994986	995504	+	hypothetical_protein	IX92_RS20620
WP_043010370	995548	996528	-	catabolite_repressor/activator	cra
WP_043010372	996793	997929	+	fused_PTS_fructose_transporter_subunit_IIA/HPr protein	IX92_RS20635
WP_043010373	997939	998889	+	1-phosphofructokinase	pfkB
WP_043010375	998907	1000643	+	PTS_fructose_transporter_subunit_IIBC	fruA
WP_043010376	1000870	1002771	+	sensor_domain-containing_diguanylate_cyclase	IX92_RS20650
WP_006960969	1002927	1004144	+	glucose-1-phosphate_adenylyltransferase	glgC
WP_040121606	1004331	1005218	-	AraC_family_transcriptional_regulator	IX92_RS20660
WP_038163731	1005406	1006554	+	iron-containing_alcohol_dehydrogenase	IX92_RS20665
WP_038163734	1006622	1007251	+	lysoplasmalogenase	IX92_RS20670
WP_043010377	1007255	1007779	-	GNAT_family_N-acetyltransferase	IX92_RS20675
WP_043010378	1007788	1010664	-	TMAO_reductase_system_sensor_histidine	torS
WP_043010379	1010745	1011746	+	TMAO_reductase_system_periplasmic_protein_TorT	torT
WP_006960955	1011769	1012224	+	methylglyoxal_synthase	IX92_RS20690
WP_043010380	1012337	1013050	+	GntR_family_transcriptional_regulator	IX92_RS20695
WP_038163740	1013063	1014262	-	2-dehydro-3-deoxy-6-phosphogalactonate_aldolase	IX92_RS20700
WP_043010381	1014527	1015966	+	PTS_transporter_subunit_EIIC	IX92_RS20705
WP_043010382	1016039	1016989	+	sugar_kinase	IX92_RS20710
WP_043010383	1017002	1017628	+	bifunctional_4-hydroxy-2-oxoglutarate	IX92_RS20715
WP_006960949	1017906	1018103	+	hypothetical_protein	IX92_RS20720
WP_021455493	1018107	1018754	-	HAD-IA_family_hydrolase	IX92_RS20725
WP_043010384	1019011	1019511	-	hypothetical_protein	IX92_RS20730
WP_021455494	1019659	1020129	+	CreA_family_protein	IX92_RS20735
WP_006960945	1020241	1021545	+	inosine/guanosine_kinase	IX92_RS20740
WP_043011062	1021588	1022187	-	beta-phosphoglucomutase_family_hydrolase	IX92_RS20745
WP_040121598	1022327	1024090	+	methyl-accepting_chemotaxis_protein	IX92_RS20750
WP_043010386	1024134	1025075	-	DNA-binding_transcriptional_regulator_DsdC	dsdC
WP_043010387	1025249	1026556	+	D-serine_ammonia-lyase	IX92_RS20760
WP_043010388	1026591	1026809	-	hypothetical_protein	IX92_RS20765
WP_006960939	1026819	1027214	-	VOC_family_protein	IX92_RS20770
WP_021455500	1027276	1030428	-	multidrug_efflux_RND_transporter_permease subunit	IX92_RS20775
WP_043010389	1030439	1031557	-	efflux_RND_transporter_periplasmic_adaptor subunit	IX92_RS20780
WP_006960936	1031660	1032220	-	GNAT_family_N-acetyltransferase	IX92_RS20785
WP_043010391	1032487	1033614	+	acyl-CoA_desaturase	IX92_RS20790
WP_006960933	1034220	1034993	-	transporter_substrate-binding_domain-containing protein	IX92_RS20795
WP_043010392	1035204	1035617	-	GFA_family_protein	IX92_RS20800
WP_019277657	1035637	1036032	-	GFA_family_protein	IX92_RS20805
WP_019277658	1036044	1036550	-	GNAT_family_N-acetyltransferase	IX92_RS20810
WP_043010393	1036682	1037944	-	DEAD/DEAH_box_helicase	IX92_RS20815
Table of Blast hits (query gene, subject gene, %identity, blast score, %coverage, e-value):
Vas2_910_1027312-102	WP_043010375	80	939	100.524	0
Vas2_911_1029067-103	WP_043010373	68	451	95.9877	1e-126
Vas2_912_1030046-103	WP_043010372	71	558	99.7354	1e-158
Vas2_913_1031504-103	WP_043010370	74	493	99.6933	3e-139
Vas2_938_1060783-106	WP_043010383	34	78	77	9e-15
>>
17. CP026604_1
Source: Catenovulum sp. CCB-QB4 chromosome, complete genome.
Number of proteins with BLAST hits to this cluster: 5
MultiGeneBlast score: 5.0
Cumulative Blast bit score: 2070
Table of genes, locations, strands and annotations of subject cluster:
AWB65032	162730	163914	+	hypothetical_protein	C2869_00605
AWB65033	164343	166472	+	GGDEF_domain-containing_response_regulator	C2869_00610
AWB65034	166557	170945	+	two-component_system_sensor_histidine	C2869_00615
AWB65035	170938	171786	+	chemotaxis_protein_CheR	C2869_00620
AWB68860	171776	172348	+	chemotaxis_protein_CheB	C2869_00625
AWB65036	172338	174905	+	hypothetical_protein	C2869_00630
AWB65037	175099	175458	-	hypothetical_protein	C2869_00635
AWB65038	175470	175787	-	hypothetical_protein	C2869_00640
AWB65039	176173	178266	-	hypothetical_protein	C2869_00645
AWB65040	178418	179245	+	LysR_family_transcriptional_regulator	C2869_00650
AWB65041	179396	181297	+	N-acetylgalactosamine-4-sulfatase	C2869_00655
AWB65042	182021	184120	+	hypothetical_protein	C2869_00660
AWB65043	184328	185479	+	mandelate_racemase/muconate_lactonizing_enzyme family protein	C2869_00665
AWB65044	185476	186906	+	NAD-dependent_succinate-semialdehyde dehydrogenase	C2869_00670
AWB68861	187368	188786	+	sulfatase	C2869_00675
AWB65045	188949	189281	+	alkylphosphonate_utilization_protein	C2869_00680
AWB68862	189644	190510	+	AraC_family_transcriptional_regulator	C2869_00685
AWB68863	190600	191475	-	DNA_alkylation_repair_protein	C2869_00690
AWB65046	191708	192454	+	GntR_family_transcriptional_regulator	C2869_00695
AWB65047	192644	194209	+	MFS_transporter	C2869_00700
AWB65048	194253	195173	+	hypothetical_protein	C2869_00705
AWB65049	195166	195801	+	2-dehydro-3-deoxy-6-phosphogalactonate_aldolase	C2869_00710
AWB65050	196593	198587	+	hypothetical_protein	C2869_00715
AWB65051	199671	202697	+	TonB-dependent_receptor	C2869_00720
AWB65052	202871	204106	-	group_II_intron_reverse_transcriptase/maturase	ltrA
AWB65053	205062	206597	+	sel1_repeat_family_protein	C2869_00730
AWB65054	206777	207286	-	hypothetical_protein	C2869_00735
AWB65055	207688	209358	+	hypothetical_protein	C2869_00740
AWB65056	209502	210764	-	hypothetical_protein	C2869_00745
AWB65057	211028	211363	+	hypothetical_protein	C2869_00750
AWB65058	211368	213899	+	chemotaxis_protein_CheR	C2869_00755
AWB65059	213899	214903	+	hypothetical_protein	C2869_00760
AWB65060	215208	215618	+	hypothetical_protein	C2869_00765
AWB65061	215622	216893	+	hypothetical_protein	C2869_00770
AWB65062	216936	219650	+	hypothetical_protein	C2869_00775
Table of Blast hits (query gene, subject gene, %identity, blast score, %coverage, e-value):
Vas2_925_1045421-104	AWB65047	41	419	98.482	7e-117
Vas2_929_1052442-105	AWB65050	39	447	100.957	3e-125
Vas2_929_1052442-105	AWB65042	38	431	102.711	4e-120
Vas2_938_1060783-106	AWB65049	59	253	99	3e-67
Vas2_939_1061396-106	AWB65048	47	287	95.5696	2e-77
Vas2_940_1062366-106	AWB65043	34	233	101.312	7e-61
>>
18. CP005973_9
Source: Photobacterium gaetbulicola Gung47 chromosome 1, complete sequence.
Number of proteins with BLAST hits to this cluster: 5
MultiGeneBlast score: 5.0
Cumulative Blast bit score: 1629
Table of genes, locations, strands and annotations of subject cluster:
AJR06123	1259976	1260374	+	putative_flavocytochrome_c_heme_subunit	H744_1c1098
AJR06124	1260383	1260865	+	putative_acetyl-coenzyme_A_carboxylase_carboxyl transferase subunit alpha	H744_1c1099
AJR06125	1260895	1262118	-	transposase	H744_1c1100
AJR06126	1262573	1264099	+	hypothetical_protein	H744_1c1101
AJR06127	1264174	1265070	-	hypothetical_protein	H744_1c1102
AJR06128	1265158	1265898	-	hypothetical_protein	H744_1c1103
AJR06129	1265955	1266218	-	hypothetical_protein	H744_1c1104
AJR06130	1266491	1267270	+	AraC/XylS_family_transcriptional_regulator	H744_1c1105
AJR06131	1267264	1267527	-	hypothetical_protein	H744_1c1106
AJR06132	1267761	1268069	-	hypothetical_protein	H744_1c1107
AJR06133	1268139	1268402	+	transposase_IS3/IS911_family_protein	H744_1c1108
AJR06134	1268435	1269271	+	IS407a_transposase	H744_1c1109
AJR06135	1269599	1270105	+	metal_dependent_hydrolase	H744_1c1110
AJR06136	1270185	1270607	+	hypothetical_protein	H744_1c1111
AJR06137	1270648	1270860	-	hypothetical_protein	H744_1c1112
AJR06138	1271199	1272458	+	hypothetical_protein	H744_1c1113
AJR06139	1272834	1273715	+	hypothetical_protein	H744_1c1114
AJR06140	1274300	1274929	-	hypothetical_protein	H744_1c1115
AJR06141	1275396	1277783	+	putative_anaerobic_dimethyl_sulfoxide_reductase, subunit A	H744_1c1116
AJR06142	1277794	1278411	+	oxidoreductase,_Fe-S_subunit	H744_1c1117
AJR06143	1278413	1279258	+	putative_anaerobic_dimethyl_sulfoxide_reductase subunit C	H744_1c1118
AJR06144	1279461	1280384	+	periplasmic_binding_protein	H744_1c1119
AJR06145	1280421	1281380	+	transport_system_permease_protein	H744_1c1120
AJR06146	1281373	1282320	+	transport_system_permease_protein	H744_1c1121
AJR06147	1282327	1283088	+	ABC_transporter,_ATP-binding_protein; Enterobactin uptake	H744_1c1122
AJR06148	1283134	1283961	-	putative_siderophore_utilization_protein	H744_1c1123
AJR06149	1284017	1285756	-	putative_methyl-accepting_chemotaxis_protein	H744_1c1124
AJR06150	1285939	1287123	-	mannonate_dehydratase	H744_1c1125
AJR06151	1287267	1288055	-	transcriptional_regulator	H744_1c1126
AJR06152	1288161	1289144	-	putative_dicarboxylate-binding_periplasmic protein	H744_1c1127
AJR06153	1289451	1289963	+	putative_small_integral_C4-dicarboxylate membrane transport protein	H744_1c1128
AJR06154	1290036	1291337	+	TRAP-type_C4-dicarboxylate_transport_system, large permease component	H744_1c1129
AJR06155	1291432	1292895	+	putative_mannonate_oxidoreductase	H744_1c1130
AJR06156	1292950	1294374	+	glucuronate_isomerase	H744_1c1131
AJR06157	1294371	1295333	+	carbohydrate_kinase	H744_1c1132
AJR06158	1295351	1295977	+	keto-hydroxyglutarate-aldolase/keto-deoxy- phosphogluconate aldolase	H744_1c1133
AJR06159	1296088	1296747	+	hypothetical_protein	H744_1c1134
AJR06160	1296757	1297257	+	hypothetical_protein	H744_1c1135
AJR06161	1297420	1297812	-	hypothetical_protein	H744_1c1136
AJR06162	1297813	1298295	-	hypothetical_protein	H744_1c1137
AJR06163	1298447	1300732	-	glycoside_hydrolase_family_3_protein	H744_1c1138
AJR06164	1301008	1301535	+	putative_acetyltransferase	H744_1c1139
AJR06165	1301538	1301969	-	putative_UspA_domain-containing_protein	H744_1c1140
AJR06166	1302144	1302965	+	hypothetical_protein	H744_1c1141
AJR06167	1302955	1303794	-	hypothetical_protein	H744_1c1142
AJR06168	1304286	1304600	-	hypothetical_protein	H744_1c1143
AJR06169	1304823	1306697	-	putative_Acyl-coenzyme_A_synthetase;AMP-(fatty) acid ligase	H744_1c1144
AJR06170	1306802	1307992	-	hypothetical_protein	H744_1c1145
AJR06171	1308005	1310590	-	aconitate_hydratase	H744_1c1146
AJR06172	1310615	1311790	-	methylcitrate_synthase	H744_1c1147
AJR06173	1311932	1312801	-	2-methylisocitrate_lyase	H744_1c1148
AJR06174	1312798	1313496	-	GntR_family_transcriptional_regulator	H744_1c1149
AJR06175	1313753	1314643	-	hypothetical_protein	H744_1c1150
AJR06176	1314894	1315196	+	phenylacetic_acid_degradation-like_protein	H744_1c1151
AJR06177	1315274	1315681	-	hypothetical_protein	H744_1c1152
AJR06178	1315919	1316458	-	hypothetical_protein	H744_1c1153
Table of Blast hits (query gene, subject gene, %identity, blast score, %coverage, e-value):
Vas2_917_1036862-103	AJR06144	44	300	100.656	4e-81
Vas2_918_1037832-103	AJR06145	70	474	99.373	2e-133
Vas2_919_1038919-103	AJR06146	69	357	98.1752	2e-98
Vas2_920_1039748-104	AJR06147	77	419	99.2095	4e-117
Vas2_938_1060783-106	AJR06158	35	80	77	4e-15
>>
19. NZ_BBMR01000001_2
Source: Vibrio maritimus strain JCM 19235, whole genome shotgun sequence.
Number of proteins with BLAST hits to this cluster: 5
MultiGeneBlast score: 5.0
Cumulative Blast bit score: 1607
Table of genes, locations, strands and annotations of subject cluster:
WP_081935687	193078	194406	+	peptidoglycan_DD-metalloendopeptidase_family protein	JCM19235_RS00925
WP_042469782	194432	194782	+	hypothetical_protein	JCM19235_RS00930
JCM19235_RS26955	194931	196304	+	DUF1800_family_protein	no_locus_tag
JCM19235_RS00940	196310	197444	+	DUF1501_domain-containing_protein	no_locus_tag
WP_052412616	197763	199334	+	ABC-F_family_ATP-binding_cassette domain-containing protein	JCM19235_RS00945
WP_042469784	199388	199852	+	DUF302_domain-containing_protein	JCM19235_RS00950
WP_042469785	199921	201081	-	MFS_transporter	JCM19235_RS00955
WP_081935745	201252	201494	-	GGDEF_domain-containing_protein	JCM19235_RS28275
WP_042469786	201485	202414	-	GGDEF_domain-containing_protein	JCM19235_RS00960
JCM19235_RS00965	202613	202947	-	cupin_domain-containing_protein	no_locus_tag
lsrK	202963	204510	-	autoinducer-2_kinase	no_locus_tag
JCM19235_RS00975	204634	205564	-	transcriptional_regulator_LsrR	no_locus_tag
lsrA	205922	207462	+	autoinducer_2_ABC_transporter_ATP-binding protein LsrA	no_locus_tag
WP_042469787	207455	208528	+	autoinducer_2_ABC_transporter_permease_LsrC	lsrC
JCM19235_RS00990	208512	209521	+	hypothetical_protein	no_locus_tag
lsrB	209561	210576	+	autoinducer_2_ABC_transporter_substrate-binding protein LsrB	no_locus_tag
WP_042469789	210637	211515	+	3-hydroxy-5-phosphonooxypentane-2,4-dione thiolase	lsrF
[truncated: 11,243 more rows]
