# Supplementary material for: Genome-Wide Identification and Functional Characterization of β-Agarases in Vibrio astriarenae Strain HN897
Source: Front Microbiol. 2020 Jun 24;11:1404. doi: 10.3389/fmicb.2020.01404 (PMC7326809; doi:10.3389/fmicb.2020.01404)
Supplement: TABLE S7 — Related to Figure 4C and Supplementary Figure S6. Top hit similar sequences (screened by coverage and identity) to Vas1_1339 aligned by BLASTp against non-redundant (nr) GenBank database. [file Table_7.XLSX]

## Sheet: Sheet1
Related to Figure.4C and Supplementary Figure.S6 Top hit similar sequences (screened by coverage and identity) to Vas1_1339 aligned by BLASTp against non-redundant (nr) GenBank database.
Description	Score	Score	cover	Evalue	Ident	Accession
beta-agarase [Vibrio vulnificus]	884	884	1	0	92.48	WP_130196491.1
beta-agarase [Vibrio celticus]	731	731	0.98	0	77.13	WP_065676868.1
beta-mannanase [Agarivorans albus]	689	689	0.99	0	74.45	WP_016403943.1
beta-agarase [Aliagarivorans marinus]	678	678	1	0	72.21	WP_026971821.1
beta-agarase [Agarivorans gilvus]	673	673	0.96	0	72.89	WP_055733246.1
hypothetical protein [Gayadomonas joobiniege]	611	611	0.95	0	68.06	WP_017445420.1
beta-agarase [Catenovulum sp. CCB-QB4]	605	605	0.99	0	67.11	WP_108601380.1
beta-agarase [Alteromonas stellipolaris]	598	598	0.98	0	66.44	WP_063456999.1
beta-agarase [Colwellia agarivorans]	597	597	0.98	0	64.8	WP_077338252.1
beta-agarase [Pseudoalteromonas telluritireducens]	574	574	0.98	0	61.83	WP_064385033.1
beta-agarase [Shewanella donghaensis]	570	570	0.95	0	64.37	WP_144207666.1
beta-agarase [Shewanella japonica]	562	562	0.98	0	61.01	ARD22373.1
beta-agarase [Agaribacterium haliotis]	533	533	0.99	0	57.36	WP_096087084.1
